# Supplementary material for: A copper-catalyzed B–H bond insertion reaction of azide–ynamide with borane adductsviaα-imino copper carbenes
Source: Royal Society of Chemistry journal article supplement (doi:10.1039/d2qo00457g), 2022-01-01

Supporting Information

**Copper-catalyzed B–H bond insertion reaction of azide-ynamide with borane  
adducts via  $\alpha$ -imino copper carbenes**

Chen-Yong Weng,<sup>‡a</sup> Guang-Yu Zhu,<sup>‡a</sup> Bo-Han Zhu,<sup>b</sup> Peng-Cheng Qian,<sup>\*b</sup> Xin-Qi  
Zhu,<sup>\*a</sup> Jin-Mei Zhou<sup>a</sup> and Long-Wu Ye<sup>\*a,c</sup>

<sup>a</sup>*Key Laboratory for Chemical Biology of Fujian Province and State Key Laboratory  
of Physical Chemistry of Solid Surfaces, College of Chemistry and Chemical  
Engineering, Xiamen University, Xiamen 361005, China.*

E-mail: longwuye@xmu.edu.cn; xinqizhu@xmu.edu.cn

<sup>b</sup>*Institute of New Materials & Industry Technology, College of Chemistry & Materials  
Engineering, Wenzhou University, Wenzhou 325035, China.*

E-mail: qpc@wzu.edu.cn

<sup>c</sup>*State Key Laboratory of Organometallic Chemistry, Shanghai Institute of Organic  
Chemistry, Chinese Academy of Sciences, Shanghai 200032, China.*

| <b>Content</b>                                              | <b>Page Number</b> |
|-------------------------------------------------------------|--------------------|
| <b>General Information.</b>                                 | 2                  |
| <b>More Reaction Condition Study</b>                        | 3                  |
| <b>General Procedures and Transformations</b>               | 4                  |
| <b>References</b>                                           | 25                 |
| <b><sup>1</sup>H, <sup>13</sup>C and <sup>19</sup>F NMR</b> | 26                 |

## General Information

All reactions were carried out with a Titan HMS-14 digital magnetic stirrer with hot plate. Ethyl acetate (ACS grade), hexanes (ACS grade), anhydrous 1,2-dichloroethane (ACS grade) and toluene (ACS grade) were obtained commercially and used without further purification. Methylene chloride, tetrahydrofuran and diethyl ether were purified according to standard methods unless otherwise noted. Commercially available reagents were used without further purification. Reactions were monitored by thin layer chromatography (TLC) using silicycle pre-coated silica gel plates. Flash column chromatography was performed over silica gel (200-300 mesh). Infrared spectra were recorded on a Nicolet AVATER FTIR330 spectrometer as thin film and are reported in reciprocal centimeter ( $\text{cm}^{-1}$ ). Mass spectra were recorded with Agilent 1290-6545XT Ultra-High performance liquid chromatography-quadrupole time-of-flight mass spectrometer using electron spray ionization.

$^1\text{H}$  NMR spectra and  $^{13}\text{C}$  NMR spectra, were recorded on a Bruker AV-400 spectrometer in chloroform- $d$ , acetone- $d_6$  and methanol- $d_4$ . For  $^1\text{H}$  NMR spectra, chemical shifts are reported in ppm with the internal TMS signal at 0.0 ppm as the standard. For  $^{13}\text{C}$  NMR spectra, chemical shifts are reported in ppm with the internal chloroform signal at 77.0 ppm as the standard, acetone at 30.0 ppm as a standard and methanol at 49.7 ppm as a standard.

## More Reaction Condition Study

Table S1. Screening of Other Lewis Base–Borane Adducts <sup>a</sup>

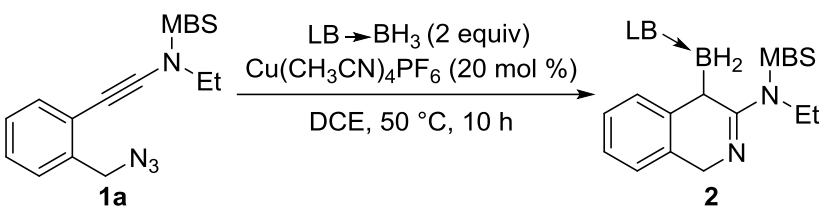

| Entry | LB                                                                                  | Yield (%) <sup>b</sup> |
|-------|-------------------------------------------------------------------------------------|------------------------|
| 1     | <i>n</i> Bu <sub>3</sub> P                                                          | n.r.                   |
| 2     | Ph <sub>3</sub> P                                                                   | n.r.                   |
| 3     | <i>n</i> Bu <sub>3</sub> N                                                          | n.r.                   |
| 4     | Et <sub>3</sub> N                                                                   | trace                  |
| 5     | Et <sub>2</sub> MeN                                                                 | trace                  |
| 6     | EtMe <sub>2</sub> N                                                                 | trace                  |
| 7     | DMAP                                                                                | n.r.                   |
| 8     | pyridine                                                                            | n.r.                   |
| 9     |  | n.r.                   |

<sup>a</sup>Reaction conditions: **1a** (0.05 mmol), Cu(CH<sub>3</sub>CN)<sub>4</sub>PF<sub>6</sub> (0.01 mmol), borane (0.1 mmol), DCE (1 mL), 50 °C, 10 h, in vials. <sup>b</sup>Measured by <sup>1</sup>H NMR using 1,3,5-trimethoxybenzene as internal reference.

Our attempts to extend the reaction to other Lewis base-borane adducts only led to the formation of complicated mixtures or no reaction.

## Representative synthetic procedure for the preparation of ynamides **1**<sup>1,2</sup>

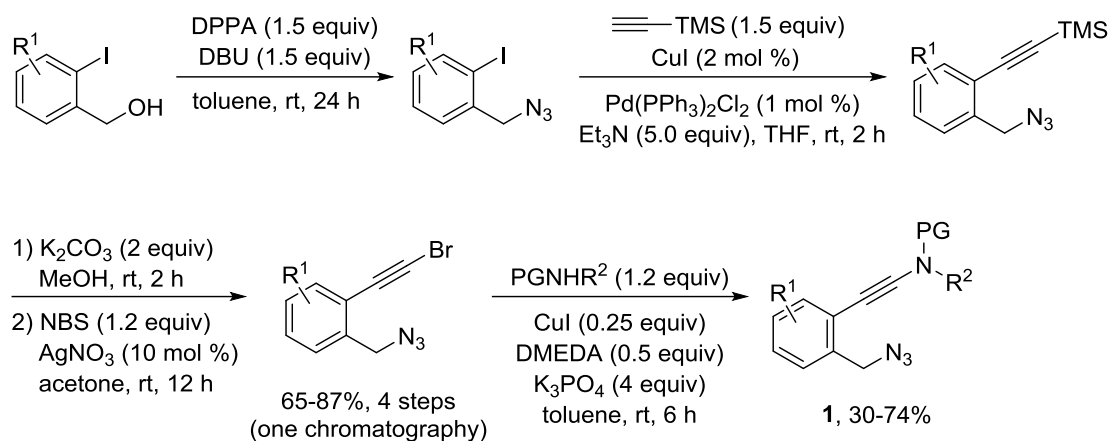

## *N*-((2-(azidomethyl)phenyl)ethynyl)-*N*-ethyl-4-methoxybenzenesulfonamide (**1a**)

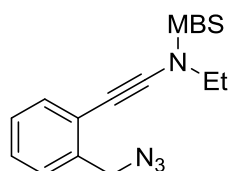

**1a**

Prepared according to typical procedure, after a flash column chromatography (PE:EA = 10:1) the product **1a** was afforded as a pale yellow oil (55%, 203.5 mg). <sup>1</sup>H NMR (400 MHz, CDCl<sub>3</sub>) δ 7.90 (d, *J* = 8.4 Hz, 2H), 7.41 – 7.27 (m, 4H), 7.02 (d, *J* = 8.8 Hz, 2H), 4.45 (s, 2H), 3.87 (s, 3H), 3.51 (q, *J* = 7.2 Hz, 2H), 1.29 (t, *J* = 7.2 Hz, 3H); <sup>13</sup>C NMR (100 MHz, CDCl<sub>3</sub>) δ 163.7, 136.3, 131.8, 129.7, 129.1, 128.5, 128.1, 127.9, 122.6, 114.4, 87.1, 68.5, 55.6, 53.1, 46.6, 13.3; IR (neat): 2936, 2203, 2083, 1589, 1362, 1262, 1158, 1092, 996, 804, 756 cm<sup>-1</sup>; HRESIMS Calcd for [C<sub>18</sub>H<sub>18</sub>N<sub>4</sub>NaO<sub>3</sub>S]<sup>+</sup> (M + Na<sup>+</sup>) 393.0992, found 393.0997.

## *N*-((2-(azidomethyl)phenyl)ethynyl)-*N*-ethyl-4-methylbenzenesulfonamide (**1b**)

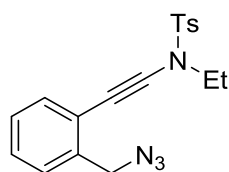

**1b**

Prepared according to typical procedure, after a flash column chromatography (PE:EA = 10:1) the product **1b** was afforded as a pale yellow oil (48%, 170.1 mg). <sup>1</sup>H NMR (400 MHz, CDCl<sub>3</sub>) δ 7.85 (d, *J* = 8.0 Hz, 2H), 7.41 – 7.25 (m, 6H), 4.40 (s, 2H), 3.51 (q, *J* = 7.2 Hz, 2H), 2.41 (s, 3H), 1.28 (t, *J* = 7.2 Hz, 3H); <sup>13</sup>C NMR (100 MHz, CDCl<sub>3</sub>) δ 144.7, 136.1, 134.5, 131.6, 129.7, 128.4, 127.9, 127.8, 127.3, 122.4, 86.8, 68.3, 52.9, 46.5, 21.3, 13.1; IR (neat): 2980, 2287, 2096, 1627, 1452, 1342, 1260, 1178, 1090, 997 cm<sup>-1</sup>; HRESIMS Calcd for [C<sub>18</sub>H<sub>18</sub>N<sub>4</sub>NaO<sub>2</sub>S]<sup>+</sup> (*M* + Na<sup>+</sup>) 377.1043, found 377.1048.

***N*-((2-(azidomethyl)phenyl)ethynyl)-4-bromo-*N*-ethylbenzenesulfonamide (1c)**

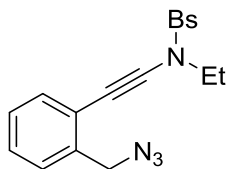

**1c**

Prepared according to typical procedure, after a flash column chromatography (PE:EA = 10:1) the product **1c** was afforded as a pale yellow oil (34%, 142.6 mg). <sup>1</sup>H NMR (400 MHz, CDCl<sub>3</sub>) δ 7.84 (d, *J* = 8.8 Hz, 2H), 7.70 (d, *J* = 8.8 Hz, 2H), 7.42 – 7.27 (m, 4H), 4.45 (s, 2H), 3.53 (q, *J* = 7.2 Hz, 2H), 1.30 (t, *J* = 7.2 Hz, 3H); <sup>13</sup>C NMR (100 MHz, CDCl<sub>3</sub>) δ 136.5, 136.3, 132.5, 131.9, 128.9, 128.8, 128.7, 128.2, 122.3, 86.2, 68.7, 53.0, 46.8, 13.3; IR (neat): 2939, 2787, 2256, 2102, 1587, 1448, 1397, 1019, 862 cm<sup>-1</sup>; HRESIMS Calcd for [C<sub>17</sub>H<sub>15</sub>N<sub>4</sub>BrNaO<sub>2</sub>S]<sup>+</sup> (*M* + Na<sup>+</sup>) 440.9991, found: 440.9997.

***N*-((2-(azidomethyl)phenyl)ethynyl)-*N*-ethylbenzenesulfonamide (1d)**

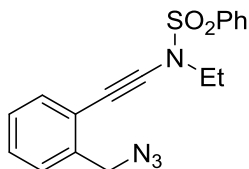

**1d**

Prepared according to typical procedure, after a flash column chromatography (PE:EA = 10:1) the product **1d** was afforded as a pale yellow oil (52%, 176.8 mg). <sup>1</sup>H NMR (400 MHz, CDCl<sub>3</sub>) δ 7.97 (d, *J* = 7.6 Hz, 2H), 7.63 (t, *J* = 7.2 Hz, 1H), 7.54 (t, *J* = 7.6

Hz, 2H), 7.41 – 7.39 (m, 1H), 7.33 – 7.24 (m, 3H), 4.43 (s, 2H), 3.52 (q,  $J = 7.2$  Hz, 2H), 1.27 (t,  $J = 7.2$  Hz, 3H);  $^{13}\text{C}$  NMR (100 MHz,  $\text{CDCl}_3$ )  $\delta$  137.3, 136.2, 133.6, 131.7, 129.1, 128.5, 128.0, 127.9, 127.2, 122.3, 86.5, 68.3, 52.8, 46.6, 13.1; IR (neat): 3057, 2829, 2787, 2153, 2122, 1379, 1097, 1019, 950, 730  $\text{cm}^{-1}$ ; HRESIMS Calcd for  $[\text{C}_{17}\text{H}_{16}\text{N}_4\text{NaO}_2\text{S}]^+$  ( $\text{M} + \text{Na}^+$ ) 363.0886, found: 363.0894.

***N*-((2-(azidomethyl)phenyl)ethynyl)-4-methoxy-*N*-methylbenzenesulfonamide**

**(1e)**

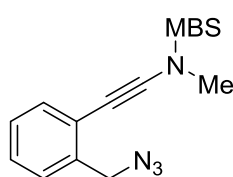

**1e**

Prepared according to typical procedure, after a flash column chromatography (PE:EA = 10:1) the product **1e** was afforded as a pale yellow oil (74%, 263.7 mg).  $^1\text{H}$  NMR (400 MHz,  $\text{CDCl}_3$ )  $\delta$  7.90 (d,  $J = 9.2$  Hz, 2H), 7.40 – 7.26 (m, 4H), 7.03 (d,  $J = 8.8$  Hz, 2H), 4.45 (s, 2H), 3.87 (s, 3H), 3.17 (s, 3H);  $^{13}\text{C}$  NMR (100 MHz,  $\text{CDCl}_3$ )  $\delta$  163.8, 136.4, 131.8, 129.9, 128.5, 128.1, 128.0, 127.6, 122.4, 114.4, 88.9, 66.6, 55.6, 53.0, 39.0; IR (neat): 2968, 2233, 2097, 1595, 1498, 1363, 1311, 1261, 1159, 805  $\text{cm}^{-1}$ ; HRESIMS Calcd for  $[\text{C}_{17}\text{H}_{16}\text{N}_4\text{NaO}_3\text{S}]^+$  ( $\text{M} + \text{Na}^+$ ) 379.0835, found: 379.0845.

***N*-((2-(azidomethyl)phenyl)ethynyl)-4-methoxy-*N*-propylbenzenesulfonamide**

**(1f)**

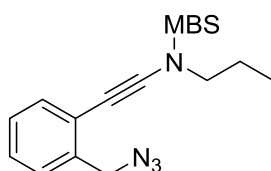

**1f**

Prepared according to typical procedure, after a flash column chromatography (PE:EA = 10:1) the product **1f** was afforded as a pale yellow oil (36%, 138.4 mg).  $^1\text{H}$  NMR (400 MHz,  $\text{CDCl}_3$ )  $\delta$  7.90 (d,  $J = 8.8$  Hz, 2H), 7.40 – 7.26 (m, 4H), 7.01 (d,  $J = 8.8$  Hz, 2H), 4.44 (s, 2H), 3.86 (s, 3H), 3.39 (t,  $J = 7.2$  Hz, 2H), 1.79 – 1.70 (m, 2H), 0.96 (t,  $J$

= 7.2 Hz, 3H);  $^{13}\text{C}$  NMR (100 MHz,  $\text{CDCl}_3$ )  $\delta$  163.7, 136.3, 131.7, 129.7, 129.0, 128.5, 128.1, 127.9, 122.6, 114.3, 87.4, 68.2, 55.6, 53.0(2), 52.9(8), 21.3, 10.8; IR (neat): 2968, 2306, 2057, 1598, 1498, 1324, 1260, 1096, 1027, 835  $\text{cm}^{-1}$ ; HRESIMS Calcd for  $[\text{C}_{19}\text{H}_{20}\text{N}_4\text{NaO}_3\text{S}]^+$  ( $\text{M} + \text{Na}^+$ ) 407.1148, found: 407.1155.

***N*-((2-(azidomethyl)phenyl)ethynyl)-*N*-butyl-4-methoxybenzenesulfonamide (**1g**)**

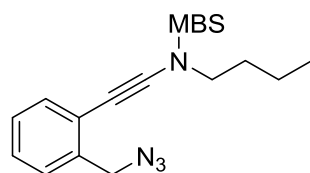

**1g**

Prepared according to typical procedure, after a flash column chromatography (PE:EA = 10:1) the product **1g** was afforded as a pale yellow oil (30%, 119.4 mg).  $^1\text{H}$  NMR (400 MHz,  $\text{CDCl}_3$ )  $\delta$  7.90 (d,  $J = 9.2$  Hz, 2H), 7.41 – 7.27 (m, 4H), 7.02 (d,  $J = 8.8$  Hz, 2H), 4.45 (s, 2H), 3.87 (s, 3H), 3.43 (t,  $J = 7.2$  Hz, 2H), 1.74 – 1.67 (m, 2H), 1.42 – 1.37 (m, 2H), 0.93 (t,  $J = 7.2$  Hz, 3H);  $^{13}\text{C}$  NMR (100 MHz,  $\text{CDCl}_3$ )  $\delta$  163.7, 136.2, 131.7, 129.7, 129.0, 128.5, 128.1, 127.9, 122.6, 114.3, 87.4, 68.3, 55.6, 53.0, 51.1, 29.9, 19.4, 13.5; IR (neat): 3040, 2306, 2057, 1597, 1462, 1231, 1027, 918, 802, 741  $\text{cm}^{-1}$ ; HRESIMS Calcd for  $[\text{C}_{20}\text{H}_{22}\text{N}_4\text{NaO}_3\text{S}]^+$  ( $\text{M} + \text{Na}^+$ ) 421.1305, found: 421.1314.

***N*-((2-(azidomethyl)phenyl)ethynyl)-*N*-cyclohexyl-4-methoxybenzenesulfonamide (**1h**)**

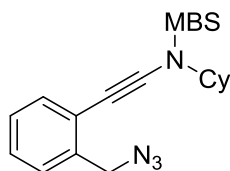

**1h**

Prepared according to typical procedure, after a flash column chromatography (PE:EA = 10:1) the product **1h** was afforded as a pale yellow oil (35%, 148.6 mg).  $^1\text{H}$  NMR (400 MHz,  $\text{CDCl}_3$ )  $\delta$  7.91 (d,  $J = 8.8$  Hz, 2H), 7.43 – 7.41 (m, 1H), 7.37 – 7.32 (m, 1H), 7.29 – 7.26 (m, 2H), 6.99 (d,  $J = 8.8$  Hz, 2H), 4.45 (s, 2H), 3.88 – 3.81 (m, 4H), 1.79 – 1.72 (m, 4H), 1.61 – 1.51 (m, 3H), 1.36 – 1.26 (m, 2H), 1.12 – 1.03 (m, 1H);  $^{13}\text{C}$  NMR

(100 MHz, CDCl<sub>3</sub>)  $\delta$  163.4, 135.9, 131.6, 130.4, 129.3, 128.5, 128.0, 127.6, 122.8, 114.2, 85.3, 69.9, 59.4, 55.5, 52.9, 31.1, 25.2, 24.7; IR (neat): 3025, 2229, 2102, 1593, 1447, 1361, 1025, 986, 810 cm<sup>-1</sup>; HRESIMS Calcd for [C<sub>22</sub>H<sub>24</sub>N<sub>4</sub>NaO<sub>3</sub>S]<sup>+</sup> (M + Na<sup>+</sup>) 447.1461, found: 447.1469.

***N*-((2-(azidomethyl)phenyl)ethynyl)-*N*-benzyl-4-methoxybenzenesulfonamide (**1i**)**

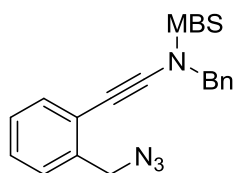

**1i**

Prepared according to typical procedure, after a flash column chromatography (PE:EA = 10:1) the product **1i** was afforded as a pale yellow oil (37%, 168.5 mg). <sup>1</sup>H NMR (400 MHz, CDCl<sub>3</sub>)  $\delta$  7.87 (d, *J* = 8.8 Hz, 2H), 7.33 (s, 5H), 7.26 – 7.19 (m, 4H), 6.99 (d, *J* = 8.8 Hz, 2H), 4.60 (s, 2H), 4.13 (s, 2H), 3.86 (s, 3H); <sup>13</sup>C NMR (100 MHz, CDCl<sub>3</sub>)  $\delta$  163.8, 136.2, 134.2, 131.5, 129.9, 129.0, 128.8, 128.6, 128.4, 128.1, 127.9, 122.2, 114.4, 87.5, 69.1, 55.7, 55.4, 52.6; IR (neat): 2980, 2230, 2094, 1635, 1454, 1339, 1188, 1339, 996, 752 cm<sup>-1</sup>; HRESIMS Calcd for [C<sub>23</sub>H<sub>20</sub>N<sub>4</sub>NaO<sub>3</sub>S]<sup>+</sup> (M + Na<sup>+</sup>) 455.1148, found: 455.1139.

***N*-((2-(azidomethyl)phenyl)ethynyl)-4-methoxy-*N*-phenylbenzenesulfonamide**

**(1j)**

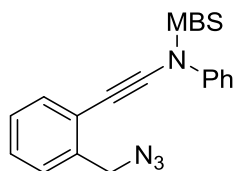

**1j**

Prepared according to typical procedure, after a flash column chromatography (PE:EA = 10:1) the product **1j** was afforded as a pale yellow oil (52%, 217.4 mg). <sup>1</sup>H NMR (400 MHz, CDCl<sub>3</sub>)  $\delta$  7.54 (d, *J* = 9.2 Hz, 2H), 7.28 – 7.11 (m, 9H), 6.79 (d, *J* = 9.2 Hz, 2H), 4.33 (s, 2H), 3.67 (s, 3H); <sup>13</sup>C NMR (100 MHz, CDCl<sub>3</sub>)  $\delta$  163.9, 138.6, 136.4, 131.8, 130.2, 129.1, 128.5, 128.2, 128.1(1), 128.0(5), 127.2, 126.1, 122.2, 114.0, 87.8,



68.0, 55.5, 52.9; IR (neat): 3066, 2237, 2091, 1576, 1456, 1263, 1113, 1090, 888, 692  $\text{cm}^{-1}$ ; HRESIMS Calcd for  $[\text{C}_{22}\text{H}_{18}\text{N}_4\text{NaO}_3\text{S}]^+$  ( $\text{M} + \text{Na}^+$ ) 441.0992, found: 441.0994.

***N*-((2-(azidomethyl)-4-fluorophenyl)ethynyl)-*N*-ethyl-4-methoxybenzenesulfonamide (1k)**

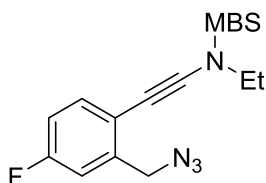

**1k**

Prepared according to typical procedure, after a flash column chromatography (PE:EA = 10:1) the product **1k** was afforded as a pale yellow oil (39%, 151.3 mg).  $^1\text{H}$  NMR (400 MHz,  $\text{CDCl}_3$ )  $\delta$  7.90 (d,  $J = 8.8$  Hz, 2H), 7.31 (dd,  $J = 8.4, 5.6$  Hz, 1H), 7.08 (dd,  $J = 8.8, 2.8$  Hz, 1H), 7.03 (d,  $J = 8.8$  Hz, 2H), 6.98 (td,  $J = 8.4, 2.8$  Hz, 1H), 4.43 (s, 2H), 3.87 (s, 3H), 3.51 (q,  $J = 7.2$  Hz, 2H), 1.29 (t,  $J = 7.2$  Hz, 3H);  $^{13}\text{C}$  NMR (100 MHz,  $\text{CDCl}_3$ )  $\delta$  163.8, 161.9 (d,  $J = 246.0$  Hz), 132.1 (d,  $J = 3.0$  Hz), 130.4 (d,  $J = 9.0$  Hz), 129.7, 129.0, 124.7 (d,  $J = 10.0$  Hz), 118.0 (d,  $J = 23.0$  Hz), 115.0, 114.6 (d,  $J = 21.0$  Hz), 114.4, 88.1, 67.9 (d,  $J = 3.0$  Hz), 55.6, 52.3, 46.5, 13.2;  $^{19}\text{F}$  NMR (376 MHz,  $\text{CDCl}_3$ )  $\delta$  -110.6; IR (neat): 3066, 2235, 2093, 1609, 1497, 1261, 1092, 916, 730, 556  $\text{cm}^{-1}$ ; HRESIMS Calcd for  $[\text{C}_{18}\text{H}_{17}\text{FN}_4\text{NaO}_3\text{S}]^+$  ( $\text{M} + \text{Na}^+$ ) 411.0898, found: 411.0905.

***N*-((2-(azidomethyl)-4-chlorophenyl)ethynyl)-*N*-ethyl-4-methoxybenzenesulfonamide (1l)**

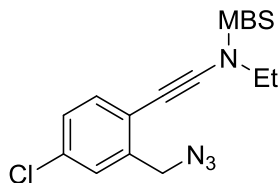

**1l**

Prepared according to typical procedure, after a flash column chromatography (PE:EA = 10:1) the product **1l** was afforded as a pale yellow oil (51%, 206.0 mg).  $^1\text{H}$  NMR (400 MHz,  $\text{CDCl}_3$ )  $\delta$  7.88 (d,  $J = 8.8$  Hz, 2H), 7.35 – 7.30 (m, 2H), 7.22 (dd,  $J = 8.4, 2.0$  Hz, 1H), 7.02 (d,  $J = 8.8$  Hz, 2H), 4.44 (s, 2H), 3.87 (s, 3H), 3.51 (q,  $J = 7.2$  Hz,

2H), 1.28 (t,  $J = 7.2$  Hz, 3H);  $^{13}\text{C}$  NMR (100 MHz,  $\text{CDCl}_3$ )  $\delta$  163.7, 138.1, 133.5, 132.7, 129.6, 128.9, 128.2, 128.1, 120.8, 114.3, 88.0, 67.5, 55.5, 52.4, 46.4, 13.2; IR (neat): 3035, 2212, 2105, 1595, 1497, 1332, 1263, 1159, 995, 834  $\text{cm}^{-1}$ ; HRESIMS Calcd for  $[\text{C}_{18}\text{H}_{17}\text{ClN}_4\text{NaO}_3\text{S}]^+$  ( $\text{M} + \text{Na}^+$ ) 427.0602, found: 427.0599.

***N*-((2-(azidomethyl)-4-bromophenyl)ethynyl)-*N*-ethyl-4-methoxybenzenesulfonamide (1m)**

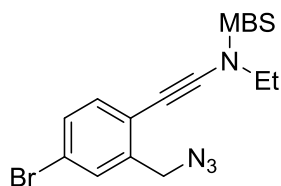

**1m**

Prepared according to typical procedure, after a flash column chromatography (PE:EA = 10:1) the product **1m** was afforded as a pale yellow oil (49%, 219.5 mg).  $^1\text{H}$  NMR (400 MHz,  $\text{CDCl}_3$ )  $\delta$  7.89 (d,  $J = 8.8$  Hz, 2H), 7.51 (d,  $J = 1.6$  Hz, 1H), 7.40 (dd,  $J = 8.4, 1.6$  Hz, 1H), 7.21 (d,  $J = 8.4$  Hz, 1H), 7.03 (d,  $J = 8.8$  Hz, 2H), 4.41 (s, 2H), 3.88 (s, 3H), 3.51 (q,  $J = 7.2$  Hz, 2H), 1.29 (t,  $J = 7.2$  Hz, 3H);  $^{13}\text{C}$  NMR (100 MHz,  $\text{CDCl}_3$ )  $\delta$  163.8, 135.1, 133.9, 130.8, 129.9, 129.7, 129.0, 124.6, 121.7, 114.4, 88.5, 67.6, 55.6, 52.5, 46.5, 13.3; IR (neat): 2937, 2231, 2097, 1597, 1497, 1363, 1259, 1158, 835, 764  $\text{cm}^{-1}$ ; HRESIMS Calcd for  $[\text{C}_{18}\text{H}_{17}\text{BrN}_4\text{NaO}_3\text{S}]^+$  ( $\text{M} + \text{Na}^+$ ) 471.0097, found: 471.0089.

***N*-((2-(azidomethyl)-4-methylphenyl)ethynyl)-*N*-ethyl-4-methoxybenzenesulfonamide (1n)**

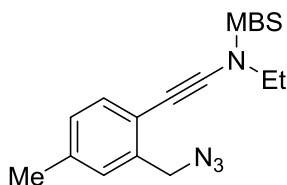

**1n**

Prepared according to typical procedure, after a flash column chromatography (PE:EA = 10:1) the product **1n** was afforded as a pale yellow oil (53%, 203.5 mg).  $^1\text{H}$  NMR (400 MHz,  $\text{CDCl}_3$ )  $\delta$  7.89 (d,  $J = 8.8$  Hz, 2H), 7.30 (d,  $J = 8.0$  Hz, 1H), 7.15 (s, 1H), 7.07 (d,  $J = 7.6$  Hz, 1H), 7.01 (d,  $J = 8.8$  Hz, 2H), 4.41 (s, 2H), 3.85 (s, 3H), 3.49 (q,  $J$

= 7.2 Hz, 2H), 2.34 (s, 3H), 1.28 (t,  $J = 7.2$  Hz, 3H);  $^{13}\text{C}$  NMR (100 MHz,  $\text{CDCl}_3$ )  $\delta$  163.6, 138.2, 136.3, 131.8, 129.6, 129.2, 129.0, 128.8, 119.4, 114.3, 86.1, 68.3, 55.5, 53.0, 46.5, 21.2, 13.2; IR (neat): 2978, 2232, 2093, 1594, 1362, 1260, 1089, 926, 834, 671  $\text{cm}^{-1}$ ; HRESIMS Calcd for  $[\text{C}_{19}\text{H}_{20}\text{N}_4\text{NaO}_3\text{S}]^+$  ( $\text{M} + \text{Na}^+$ ) 407.1148, found: 407.1152.

***N*-((2-(azidomethyl)-5-methylphenyl)ethynyl)-*N*-ethyl-4-methoxybenzenesulfonamide (1o)**

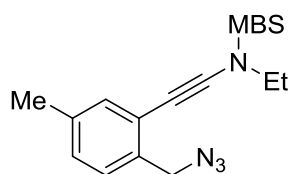

**1o**

Prepared according to typical procedure, after a flash column chromatography (PE:EA = 10:1) the product **1o** was afforded as a pale yellow oil (49%, 188.5 mg).  $^1\text{H}$  NMR (400 MHz,  $\text{CDCl}_3$ )  $\delta$  7.89 (d,  $J = 8.8$  Hz, 2H), 7.30 (d,  $J = 8.0$  Hz, 1H), 7.15 (s, 1H), 7.07 (d,  $J = 7.6$  Hz, 1H), 7.01 (d,  $J = 8.8$  Hz, 2H), 4.41 (s, 2H), 3.86 (s, 3H), 3.50 (q,  $J = 7.2$  Hz, 2H), 2.34 (s, 3H), 1.28 (t,  $J = 7.2$  Hz, 3H);  $^{13}\text{C}$  NMR (100 MHz,  $\text{CDCl}_3$ )  $\delta$  163.7, 138.3, 136.3, 131.9, 129.7, 129.3, 129.1, 128.9, 119.5, 114.3, 86.2, 68.3, 55.6, 53.0, 46.5, 21.3, 13.2; IR (neat): 3066, 2273, 2023, 1608, 1491, 1361, 1089, 883, 651, 542  $\text{cm}^{-1}$ ; HRESIMS Calcd for  $[\text{C}_{19}\text{H}_{20}\text{N}_4\text{NaO}_3\text{S}]^+$  ( $\text{M} + \text{Na}^+$ ) 407.1148, found: 407.1152.

***N*-((2-(azidomethyl)-5-methoxyphenyl)ethynyl)-*N*-ethyl-4-methoxybenzenesulfonamide (1p)**

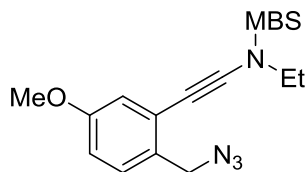

**1p**

Prepared according to typical procedure, after a flash column chromatography (PE:EA = 10:1) the product **1p** was afforded as a pale yellow oil (42%, 168.2 mg).  $^1\text{H}$  NMR

(400 MHz, CDCl<sub>3</sub>)  $\delta$  7.90 (d,  $J$  = 8.8 Hz, 2H), 7.23 (d,  $J$  = 8.4 Hz, 1H), 7.01 (d,  $J$  = 8.8 Hz, 2H), 6.92 (d,  $J$  = 2.4 Hz, 1H), 6.83 (dd,  $J$  = 8.4, 2.8 Hz, 1H), 4.38 (s, 2H), 3.86 (s, 3H), 3.78 (s, 3H), 3.51 (q,  $J$  = 7.2 Hz, 2H), 1.29 (t,  $J$  = 7.2 Hz, 3H); <sup>13</sup>C NMR (100 MHz, CDCl<sub>3</sub>)  $\delta$  163.7, 159.1, 130.2, 129.6, 129.0, 128.4, 123.9, 116.5, 114.3, 114.0, 86.7, 68.6, 55.5, 55.2, 52.5, 46.5, 13.2; IR (neat): 3100, 2242, 2087, 1593, 1193, 1089, 987, 834, 671 cm<sup>-1</sup>; HRESIMS Calcd for [C<sub>19</sub>H<sub>20</sub>N<sub>4</sub>NaO<sub>4</sub>S]<sup>+</sup> (M + Na<sup>+</sup>) 423.1097, found: 423.1099.

### General procedure for the synthesis of organoboron compound 2:

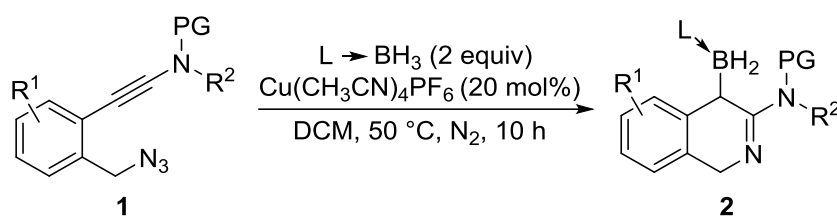

Cu(CH<sub>3</sub>CN)<sub>4</sub>PF<sub>6</sub> (0.06 mmol, 20 mol %) was added to a solution of the azide-ynamide **1** (0.3 mmol, 1 equiv) and borane adduct (0.6 mmol, 2 equiv) in DCM (0.05 M) at room temperature. The reaction mixture was stirred at 50 °C in sealed tubes under N<sub>2</sub> atmosphere, and the progress of the reaction was monitored by TLC. Upon completion, the mixture was then concentrated and the residue was purified by chromatography on silica gel (PE:EA = 3:1) to afford the desired organoboron compound **2**.

### *N*-(4-(1-methylpyrrolidine-boranyl)-1,4-dihydroisoquinolin-3-yl)-*N*-ethyl-4-methoxybenzenesulfonamide (**2a**)

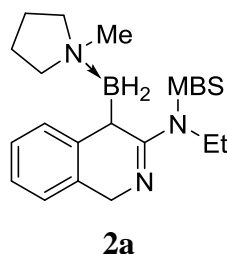

Compound **2a** was prepared in 78% yield (103.2 mg) according to the general procedure (Table 2, entry 1). The product was isolated through silica gel column chromatography (PE:EA = 3:1) as a brown solid (mp 81–83 °C). <sup>1</sup>H NMR (400 MHz,

CDCl<sub>3</sub>)  $\delta$  7.49 (d,  $J = 8.8$  Hz, 2H), 7.15 – 7.05 (m, 4H), 6.72 (d,  $J = 8.8$  Hz, 2H), 4.56 (s, 2H), 4.13 (s, 1H), 3.75 (s, 3H), 3.71 – 3.61 (m, 2H), 3.30 – 3.24 (m, 1H), 3.08 – 3.02 (m, 1H), 2.97 – 2.91 (m, 1H), 2.82 – 2.76 (m, 1H), 2.69 (s, 3H), 2.02 – 1.92 (m, 4H), 1.23 (t,  $J = 7.2$  Hz, 3H); <sup>13</sup>C NMR (100 MHz, CDCl<sub>3</sub>)  $\delta$  169.0, 162.6, 143.8, 133.4, 130.0, 129.6, 126.1, 125.1, 124.8, 123.9, 113.6, 62.0, 61.6, 55.4, 53.0, 48.3, 43.6, 22.6, 22.3, 14.4; <sup>11</sup>B NMR (128 MHz, CDCl<sub>3</sub>)  $\delta$  -5.40; IR (neat): 3447, 2382, 1628, 1596, 1340, 1150, 1088, 1025, 833, 750 cm<sup>-1</sup>; HRESIMS Calcd for [C<sub>23</sub>H<sub>32</sub>BN<sub>3</sub>NaO<sub>3</sub>S]<sup>+</sup> (M + Na<sup>+</sup>) 464.2150, found 464.2144.

***N*-(4-(1-methylpyrrolidine-boranyl)-1,4-dihydroisoquinolin-3-yl)-*N*-ethyl-4-methylbenzenesulfonamide (2b)**

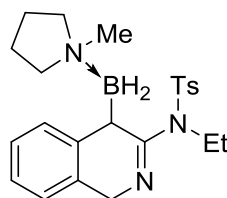

**2b**

Compound **2b** was prepared in 65% yield (82.9 mg) according to the general procedure (Table 2, entry 2). The product was isolated through silica gel column chromatography (PE:EA = 3:1) as a pale yellow oil. <sup>1</sup>H NMR (400 MHz, CDCl<sub>3</sub>)  $\delta$  7.44 (d,  $J = 8.4$  Hz, 2H), 7.14 – 7.04 (m, 6H), 4.56 (s, 2H), 4.13 (s, 1H), 3.74 – 3.63 (m, 2H), 3.27 – 3.20 (m, 1H), 3.04 – 2.97 (m, 1H), 2.92 – 2.88 (m, 1H), 2.79 – 2.72 (m, 1H), 2.65 (s, 3H), 2.27 (s, 3H), 1.99 – 1.88 (m, 4H), 1.24 (t,  $J = 7.2$  Hz, 3H); <sup>13</sup>C NMR (100 MHz, CDCl<sub>3</sub>)  $\delta$  168.7, 143.7, 143.0, 135.2, 133.4, 129.0, 127.4, 126.0, 125.0, 124.8, 123.8, 61.9, 61.5, 52.9, 48.2, 43.5, 42.7, 22.5, 22.2, 21.3, 14.4; <sup>11</sup>B NMR (128 MHz, CDCl<sub>3</sub>)  $\delta$  -5.78; IR (neat): 3340, 2381, 1633, 1340, 1260, 1150, 1090, 1024, 750 cm<sup>-1</sup>; HRESIMS Calcd for [C<sub>23</sub>H<sub>33</sub>BN<sub>3</sub>O<sub>2</sub>S]<sup>+</sup> (M + H<sup>+</sup>) 426.2381, found 426.2390.

***N*-(4-(1-methylpyrrolidine-boranyl)-1,4-dihydroisoquinolin-3-yl)-4-bromo-*N*-ethylbenzenesulfonamide (2c)**

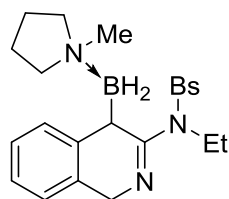

**2c**

Compound **2c** was prepared in 78% yield (114.4 mg) according to the general procedure (Table 2, entry 3). The product was isolated through silica gel column chromatography (PE:EA = 3:1) as a brown oil.  $^1\text{H}$  NMR (400 MHz,  $\text{CDCl}_3$ )  $\delta$  7.42 (dd,  $J = 15.6, 8.8$  Hz, 4H), 7.14 – 7.04 (m, 4H), 4.57 (s, 2H), 4.04 (s, 1H), 3.74 – 3.63 (m, 2H), 3.27 – 3.20 (m, 1H), 3.03 – 2.97 (m, 1H), 2.96 – 2.88 (m, 1H), 2.78 – 2.74 (m, 1H), 2.65 (s, 3H), 2.01 – 1.90 (m, 4H), 1.23 (t,  $J = 7.2$  Hz, 3H);  $^{13}\text{C}$  NMR (100 MHz,  $\text{CDCl}_3$ )  $\delta$  168.5, 143.4, 137.3, 133.3, 131.6, 129.2, 127.3, 126.2, 125.3, 124.9, 124.1, 62.1, 61.6, 53.0, 48.3, 43.8, 22.6, 22.3, 14.5;  $^{11}\text{B}$  NMR (128 MHz,  $\text{CDCl}_3$ )  $\delta$  -5.78; IR (neat): 3340, 2987, 2073, 1636, 1334, 1096, 991, 789, 595  $\text{cm}^{-1}$ ; HRESIMS Calcd for  $[\text{C}_{22}\text{H}_{29}\text{BBrN}_3\text{NaO}_2\text{S}]^+$  ( $\text{M} + \text{Na}^+$ ) 512.1149, found 512.1152.

***N*-(4-(1-methylpyrrolidine-boranyl)-1,4-dihydroisoquinolin-3-yl)-*N*-ethylbenzenesulfonamide (2d)**

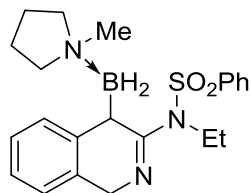

**2d**

Compound **2d** was prepared in 51% yield (62.9 mg) according to the general procedure (Table 2, entry 4). The product was isolated through silica gel column chromatography (PE:EA = 3:1) as a brown oil.  $^1\text{H}$  NMR (400 MHz,  $\text{CDCl}_3$ )  $\delta$  7.58 (d,  $J = 7.2$  Hz, 1H), 7.40 (t,  $J = 7.2$  Hz, 1H), 7.29 – 7.27 (m, 2H), 7.13 – 7.04 (m, 4H), 4.56 (s, 2H), 4.13 (s, 1H), 3.80 – 3.64 (m, 2H), 3.29 – 3.22 (m, 1H), 3.05 – 2.98 (m, 1H), 2.94 – 2.89 (m, 1H), 2.79 – 2.73 (m, 1H), 2.66 (s, 3H), 1.99 – 1.90 (m, 4H), 1.25 (t,  $J = 7.2$  Hz, 3H);  $^{13}\text{C}$  NMR (100 MHz,  $\text{CDCl}_3$ )  $\delta$  168.7, 143.6, 138.4, 133.4, 132.3, 128.4, 127.5, 126.1, 125.2, 124.9, 124.0, 62.1, 61.6, 53.0, 48.3, 43.7, 22.6, 22.3, 14.5;  $^{11}\text{B}$  NMR (128 MHz,

CDCl<sub>3</sub>)  $\delta$  -5.57; IR (neat): 3340, 3447, 1632, 1597, 1341, 1300, 1150, 1025, 833, 751 cm<sup>-1</sup>; HRESIMS Calcd for [C<sub>22</sub>H<sub>30</sub>BN<sub>3</sub>NaO<sub>2</sub>S]<sup>+</sup> (M + Na<sup>+</sup>) 434.2044, found 434.2039.

***N*-(4-(1-methylpyrrolidine-boranyl)-1,4-dihydroisoquinolin-3-yl)-4-methoxy-*N*-methylbenzenesulfonamide (2e)**

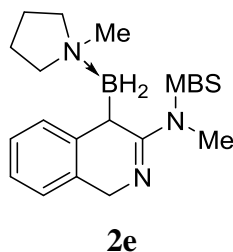

Compound **2e** was prepared in 63% yield (80.7 mg) according to the general procedure (Table 2, entry 5). The product was isolated through silica gel column chromatography (PE:EA = 3:1) as a black solid (mp 101-102 °C). <sup>1</sup>H NMR (400 MHz, CDCl<sub>3</sub>)  $\delta$  7.51 (d, *J* = 9.2 Hz, 2H), 7.19 – 7.04 (m, 4H), 6.76 (d, *J* = 9.2 Hz, 2H), 4.66 – 4.52 (m, 2H), 4.30 (s, 1H), 3.76 (s, 3H), 3.21 – 3.17 (m, 1H), 3.13 (s, 3H), 3.04 – 2.93 (m, 2H), 2.85 – 2.78 (m, 1H), 2.72 (s, 3H), 2.01 – 1.94 (m, 4H); <sup>13</sup>C NMR (100 MHz, CDCl<sub>3</sub>)  $\delta$  171.2, 163.2, 141.9, 132.2, 129.8, 127.7, 126.6, 125.4, 125.1, 124.3, 113.9, 61.9, 61.8, 55.5, 52.1, 48.1, 42.0, 36.7, 22.4(2), 22.3(9); <sup>11</sup>B NMR (128 MHz, CDCl<sub>3</sub>)  $\delta$  -5.97; IR (neat): 3340, 3374, 1635, 1558, 1260, 1151, 822, 734, 555 cm<sup>-1</sup>; HRESIMS Calcd for [C<sub>22</sub>H<sub>30</sub>BN<sub>3</sub>NaO<sub>3</sub>S]<sup>+</sup> (M + Na<sup>+</sup>) 450.1993, found 450.1995.

***N*-(4-(1-methylpyrrolidine-boranyl)-1,4-dihydroisoquinolin-3-yl)-4-methoxy-*N*-propylbenzenesulfonamide (2f)**

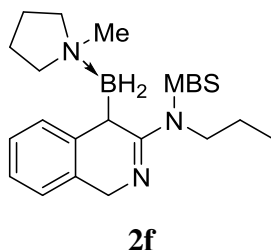

Compound **2f** was prepared in 62% yield (84.7 mg) according to the general procedure (Table 2, entry 6). The product was isolated through silica gel column chromatography (PE:EA = 3:1) as a yellow oil. <sup>1</sup>H NMR (400 MHz, CDCl<sub>3</sub>)  $\delta$  7.56 (d, *J* = 8.4 Hz, 2H),

7.17 – 7.07 (m, 4H), 6.80 (d,  $J = 8.8$  Hz, 2H), 4.60 (s, 2H), 4.11 (s, 1H), 3.78 (s, 3H), 3.72 – 3.65 (m, 1H), 3.61 – 3.56 (m, 1H), 3.23 – 3.16 (m, 1H), 2.93 – 2.86 (m, 2H), 2.74 – 2.69 (m, 1H), 2.62 (s, 3H), 1.99 – 1.87 (m, 4H), 1.74 – 1.66 (m, 2H), 0.93 (t,  $J = 7.2$  Hz, 3H);  $^{13}\text{C}$  NMR (100 MHz,  $\text{CDCl}_3$ )  $\delta$  170.7, 163.3, 144.3, 142.0, 129.8, 129.3, 126.6, 125.4, 125.1, 124.6, 114.0, 62.3, 61.6, 55.6, 51.6, 50.3, 48.2, 42.7, 22.6, 22.4, 22.1, 11.4;  $^{11}\text{B}$  NMR (128 MHz,  $\text{CDCl}_3$ )  $\delta$  -5.54; IR (neat): 3340, 2383, 1704, 1635, 1558, 1455, 1380, 1264, 1151, 1086  $\text{cm}^{-1}$ ; HRESIMS Calcd for  $[\text{C}_{24}\text{H}_{34}\text{BN}_3\text{NaO}_3\text{S}]^+$  ( $\text{M} + \text{Na}^+$ ) 478.2306, found 478.2311.

***N*-(4-(1-methylpyrrolidine-boranyl)-1,4-dihydroisoquinolin-3-yl)-*N*-butyl-4-methoxybenzenesulfonamide (2g)**

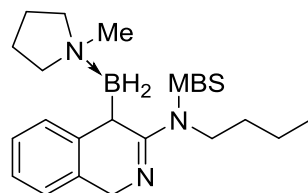

**2g**

Compound **2g** was prepared in 66% yield (92.9 mg) according to the general procedure (Table 2, entry 7). The product was isolated through silica gel column chromatography (PE:EA = 5:1) as a yellow oil.  $^1\text{H}$  NMR (400 MHz,  $\text{CDCl}_3$ )  $\delta$  7.46 (d,  $J = 9.2$  Hz, 2H), 7.12 – 7.04 (m, 4H), 6.71 (d,  $J = 8.8$  Hz, 2H), 4.54 (s, 2H), 4.15 (s, 1H), 3.74 (s, 3H), 3.70 – 3.65 (m, 1H), 3.55 – 3.48 (m, 1H), 3.31 – 3.24 (m, 1H), 3.08 – 3.01 (m, 1H), 2.95 – 2.90 (m, 1H), 2.81 – 2.75 (m, 1H), 2.68 (s, 3H), 2.00 – 1.91 (m, 4H), 1.67 – 1.60 (m, 2H), 1.39 – 1.33 (m, 2H), 0.91 (t,  $J = 7.2$  Hz, 3H);  $^{13}\text{C}$  NMR (100 MHz,  $\text{CDCl}_3$ )  $\delta$  162.6, 144.0, 133.7, 130.0, 129.6, 126.0, 125.2, 124.8, 123.9, 113.6, 62.0, 61.6, 55.4, 53.0, 48.4(2), 48.3(8), 42.9, 30.8, 22.7, 22.4, 20.3, 13.8;  $^{11}\text{B}$  NMR (128 MHz,  $\text{CDCl}_3$ )  $\delta$  -5.62; IR (neat): 3340, 2105 1704, 1635, 1518, 1339, 1259, 1149, 871, 561  $\text{cm}^{-1}$ ; HRESIMS Calcd for  $[\text{C}_{25}\text{H}_{36}\text{BN}_3\text{NaO}_3\text{S}]^+$  ( $\text{M} + \text{Na}^+$ ) 492.2463, found 492.2467.

***N*-(4-(1-methylpyrrolidine-boranyl)-1,4-dihydroisoquinolin-3-yl)-*N*-cyclohexyl-4-methoxybenzenesulfonamide (2h)**



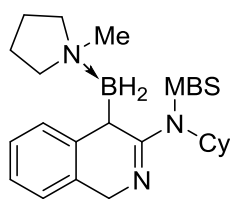

**2h**

Compound **2h** was prepared in 54% yield (80.3 mg) according to the general procedure (Table 2, entry 8). The product was isolated through silica gel column chromatography (PE:EA = 3:1) as a pale yellow oil.  $^1\text{H}$  NMR (400 MHz,  $\text{CDCl}_3$ )  $\delta$  7.84 (d,  $J = 8.8$  Hz, 2H), 7.09 – 7.01 (m, 3H), 6.95 (d,  $J = 7.2$  Hz, 1H), 6.78 (d,  $J = 9.2$  Hz, 2H), 4.68 – 4.57 (m, 2H), 3.81 – 3.73 (m, 5H), 3.25 – 3.19 (m, 1H), 3.02 – 2.95 (m, 1H), 2.90 – 2.84 (m, 1H), 2.73 – 2.68 (m, 1H), 2.61 (s, 3H), 2.15 – 2.09 (m, 2H), 1.97 – 1.88 (m, 4H), 1.68 – 1.55 (m, 6H), 1.19 – 1.06 (m, 2H);  $^{13}\text{C}$  NMR (100 MHz,  $\text{CDCl}_3$ )  $\delta$  169.4, 162.2, 143.3, 133.5, 133.1, 130.2, 125.9, 125.4, 124.9, 124.0, 113.4, 62.4, 62.2, 61.7, 55.4, 53.1, 48.3, 42.3, 34.2, 31.0, 26.9, 26.7, 25.5, 22.7, 22.3;  $^{11}\text{B}$  NMR (128 MHz,  $\text{CDCl}_3$ )  $\delta$  -4.23; IR (neat): 3340, 2388, 1682, 1622, 1397, 1260, 1076, 749  $\text{cm}^{-1}$ ; HRESIMS Calcd for  $[\text{C}_{27}\text{H}_{38}\text{BN}_3\text{NaO}_3\text{S}]^+$  ( $\text{M} + \text{Na}^+$ ) 518.2619, found 518.2614.

***N*-benzyl-*N*-(4-(1-methylpyrrolidine-boranyl)-1,4-dihydroisoquinolin-3-yl)-4-methoxybenzenesulfonamide (2i)**

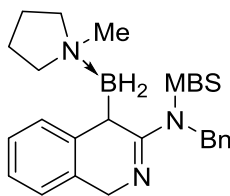

**2i**

Compound **2i** was prepared in 66% yield (99.9 mg) according to the general procedure (Table 2, entry 9). The product was isolated through silica gel column chromatography (PE:EA = 3:1) as a yellow oil.  $^1\text{H}$  NMR (400 MHz,  $\text{CDCl}_3$ )  $\delta$  7.51 – 7.46 (m, 4H), 7.28 – 7.20 (m, 3H), 7.08 – 6.96 (m, 4H), 6.69 (d,  $J = 9.2$  Hz, 2H), 5.11 (d,  $J = 14.4$  Hz, 1H), 4.75 (d,  $J = 14.4$  Hz, 1H), 4.59 – 4.50 (m, 2H), 4.06 (s, 1H), 3.72 (s, 3H), 2.90 – 2.83 (m, 2H), 2.67 – 2.58 (m, 2H), 2.42 (s, 3H), 1.80 – 1.75 (m, 4H);  $^{13}\text{C}$  NMR (100 MHz,  $\text{CDCl}_3$ )  $\delta$  168.6, 162.6, 143.7, 137.9, 133.5, 130.3, 129.7, 129.4, 127.9, 127.0, 126.0,

125.0, 124.8, 123.7, 113.5, 61.5(1), 61.4(9), 55.4, 52.7, 51.1, 47.9, 22.4, 22.3;  $^{11}\text{B}$  NMR (128 MHz,  $\text{CDCl}_3$ )  $\delta$  -3.88; IR (neat): 3340, 2970, 2381, 1704, 1632, 1558, 1340, 1153, 1091, 1024, 750  $\text{cm}^{-1}$ ; HRESIMS Calcd for  $[\text{C}_{28}\text{H}_{34}\text{BN}_3\text{NaO}_3\text{S}]^+$  ( $\text{M} + \text{Na}^+$ ) 526.2306, found 526.2302.

***N*-(4-(1-methylpyrrolidine-boranyl)-1,4-dihydroisoquinolin-3-yl)-4-methoxy-*N*-phenylbenzenesulfonamide (2j)**

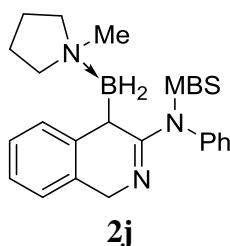

Compound **2j** was prepared in 61% yield (89.5 mg) according to the general procedure (Table 2, entry 10). The product was isolated through silica gel column chromatography (PE:EA = 3:1) as a colorless oil.  $^1\text{H}$  NMR (400 MHz,  $\text{CDCl}_3$ )  $\delta$  7.72 (d,  $J$  = 8.8 Hz, 2H), 7.43 – 7.34 (m, 3H), 7.15 – 7.12 (m, 3H), 7.07 (dd,  $J$  = 5.6, 3.2 Hz, 2H), 6.88 (d,  $J$  = 8.8 Hz, 2H), 6.74 (dd,  $J$  = 5.2, 3.2 Hz, 1H), 4.82 (s, 2H), 3.83 (s, 3H), 3.03 – 2.98 (m, 2H), 2.87 – 2.82 (m, 1H), 2.78 – 2.71 (m, 1H), 2.63 – 2.57 (m, 1H), 2.38 (s, 3H), 1.91 – 1.83 (m, 4H);  $^{13}\text{C}$  NMR (100 MHz,  $\text{CDCl}_3$ )  $\delta$  169.8, 163.9, 139.5, 136.8, 131.6, 131.0, 129.9, 129.5, 129.2, 128.8, 126.9, 125.4(1), 125.3(7), 124.9, 113.7, 62.3, 61.8, 55.7, 50.4, 47.7, 41.6, 22.4, 22.0;  $^{11}\text{B}$  NMR (128 MHz,  $\text{CDCl}_3$ )  $\delta$  -6.13; IR (neat): 3340, 2380, 1646, 1595, 1349, 1260, 1161, 1089, 750, 698  $\text{cm}^{-1}$ ; HRESIMS Calcd for  $[\text{C}_{27}\text{H}_{32}\text{BN}_3\text{NaO}_3\text{S}]^+$  ( $\text{M} + \text{Na}^+$ ) 512.2150, found 512.2158.

***N*-(4-(1-methylpyrrolidine-boranyl)-7-fluoro-1,4-dihydroisoquinolin-3-yl)-*N*-ethyl-4-methoxybenzenesulfonamide (2k)**

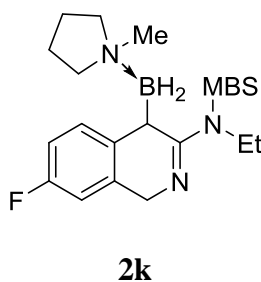

Compound **2k** was prepared in 36% yield (49.6 mg) according to the general procedure (Table 2, entry 11). The product was isolated through silica gel column chromatography (PE:EA = 3:1) as a pale red oil. <sup>1</sup>H NMR (400 MHz, CDCl<sub>3</sub>) δ 7.49 (d, *J* = 8.8 Hz, 2H), 7.00 (t, *J* = 6.4 Hz, 1H), 6.76 – 6.72 (m, 4H), 4.56 – 4.46 (m, 2H), 4.09 (s, 1H), 3.75 (s, 3H), 3.72 – 3.62 (m, 2H), 3.28 – 3.22 (m, 1H), 3.08 – 3.05 (m, 1H), 2.96 – 2.93 (m, 1H), 2.84 – 2.81 (m, 1H), 2.70 (s, 3H), 2.01 – 1.94 (m, 4H), 1.23 (t, *J* = 7.2 Hz, 3H); <sup>13</sup>C NMR (100 MHz, CDCl<sub>3</sub>) δ 168.5, 162.7, 161.7 (d, *J* = 241.0 Hz), 146.5 (d, *J* = 8.0 Hz), 129.8, 129.6, 129.1 (d, *J* = 2.0 Hz), 126.2 (d, *J* = 8.0 Hz), 113.6, 111.4 (d, *J* = 21.0 Hz), 110.4 (d, *J* = 21.0 Hz), 62.0, 61.6, 55.4, 52.3, 48.4, 43.6, 22.6, 22.3, 14.4; <sup>11</sup>B NMR (128 MHz, CDCl<sub>3</sub>) δ -6.67; <sup>19</sup>F NMR (376 MHz, CDCl<sub>3</sub>) δ -110.8; IR (neat): 3340, 2373, 1633, 1577, 1496 1341, 1152, 1089, 962, 804, 733 cm<sup>-1</sup>; HRESIMS Calcd for [C<sub>23</sub>H<sub>31</sub>BFN<sub>3</sub>NaO<sub>3</sub>S]<sup>+</sup> (M + Na<sup>+</sup>) 482.2055, found 482.2058.

***N*-(4-(1-methylpyrrolidine-boranyl)-7-chloro-1,4-dihydroisoquinolin-3-yl)-*N*-ethyl-4-methoxybenzenesulfonamide (2l)**

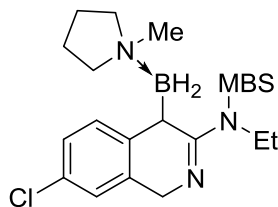

**2l**

Compound **2l** was prepared in 72% yield (102.9 mg) according to the general procedure (Table 2, entry 12). The product was isolated through silica gel column chromatography (PE:EA = 3:1) as a pale yellow oil. <sup>1</sup>H NMR (400 MHz, CDCl<sub>3</sub>) δ 7.54 (d, *J* = 8.8 Hz, 2H), 7.11 – 7.06 (m, 2H), 6.97 (d, *J* = 8.0 Hz, 1H), 6.75 (d, *J* = 9.2 Hz, 2H), 4.52 (s, 2H), 4.12 (s, 1H), 3.76 (s, 3H), 3.71 – 3.61 (m, 2H), 3.28 – 3.21 (m, 1H), 3.06 – 3.00 (m, 1H), 2.96 – 2.90 (m, 1H), 2.82 – 2.76 (m, 1H), 2.68 (s, 3H), 2.02 – 1.90 (m, 4H), 1.22 (t, *J* = 7.2 Hz, 3H); <sup>13</sup>C NMR (100 MHz, CDCl<sub>3</sub>) δ 169.1, 162.7, 142.6, 135.3, 129.7, 129.6, 129.3, 126.1, 125.9, 125.2, 113.7, 62.1, 61.6, 55.4, 52.6, 48.4, 43.6, 42.5, 22.6, 22.3, 14.4; <sup>11</sup>B NMR (128 MHz, CDCl<sub>3</sub>) δ -4.58; IR (neat): 3340, 2382, 1635,

1590 1339, 1259, 1150, 803, 749  $\text{cm}^{-1}$ ; HRESIMS Calcd for  $[\text{C}_{23}\text{H}_{31}\text{BClN}_3\text{NaO}_3\text{S}]^+$  ( $\text{M} + \text{Na}^+$ ) 498.1760, found 498.1766.

***N*-(4-(1-methylpyrrolidine-boranyl)-7-bromo-1,4-dihydroisoquinolin-3-yl)-*N*-ethyl-4-methoxybenzenesulfonamide (2m)**

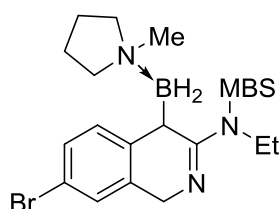

**2m**

Compound **2m** was prepared in 65% yield (101.3 mg) according to the general procedure (Table 2, entry 13). The product was isolated through silica gel column chromatography (PE:EA = 3:1) as a dark oil.  $^1\text{H}$  NMR (400 MHz,  $\text{CDCl}_3$ )  $\delta$  7.48 (d,  $J = 8.8$  Hz, 2H), 7.25 – 7.21 (m, 2H), 6.93 (d,  $J = 8.0$  Hz, 1H), 6.75 (d,  $J = 8.8$  Hz, 2H), 4.52 (s, 2H), 4.10 (s, 1H), 3.76 (s, 3H), 3.72 – 3.61 (m, 2H), 3.25 – 3.20 (m, 1H), 3.03 – 2.98 (m, 1H), 2.94 – 2.89 (m, 1H), 2.82 – 2.77 (m, 1H), 2.67 (s, 3H), 2.03 – 1.91 (m, 4H), 1.22 (t,  $J = 7.2$  Hz, 3H);  $^{13}\text{C}$  NMR (100 MHz,  $\text{CDCl}_3$ )  $\delta$  168.8, 162.6, 143.1, 135.8, 129.7, 129.5, 128.9, 128.0, 126.3, 117.2, 113.6, 62.0, 61.6, 55.4, 52.4, 48.3, 43.5, 42.4, 22.5, 22.2, 14.3;  $^{11}\text{B}$  NMR (128 MHz,  $\text{CDCl}_3$ )  $\delta$  -6.41; IR (neat): 3340, 2377, 1622, 1558, 1507, 1417, 1260, 1077, 803, 750  $\text{cm}^{-1}$ ; HRESIMS Calcd for  $[\text{C}_{23}\text{H}_{31}\text{BBrN}_3\text{NaO}_3\text{S}]^+$  ( $\text{M} + \text{Na}^+$ ) 542.1255, found 542.1259.

***N*-(4-(1-methylpyrrolidine-boranyl)-7-methyl-1,4-dihydroisoquinolin-3-yl)-*N*-ethyl-4-methoxybenzenesulfonamide (2n)**

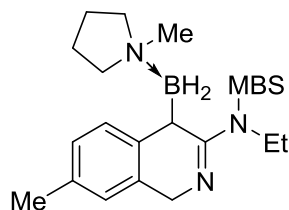

**2n**

Compound **2n** was prepared in 69% yield (94.2 mg) according to the general procedure (Table 2, entry 14). The product was isolated through silica gel column chromatography (PE:EA = 3:1) as a yellow oil.  $^1\text{H}$  NMR (400 MHz,  $\text{CDCl}_3$ )  $\delta$  7.76 (d,  $J = 9.2$  Hz, 2H), 7.57 – 6.95 (m, 5H), 4.74 – 4.63 (m, 2H), 3.94 – 3.82 (m, 6H), 3.06 – 3.01 (m, 1H), 2.93 – 2.86 (m, 1H), 2.71 – 2.59 (m, 2H), 2.53 (s, 3H), 2.29 (s, 3H), 1.92 – 1.83 (m, 4H), 1.32 (t,  $J = 7.2$  Hz, 3H);  $^{13}\text{C}$  NMR (100 MHz,  $\text{CDCl}_3$ )  $\delta$  168.7, 162.6, 158.2, 145.5, 130.0, 129.7, 126.0, 125.9, 113.6, 111.0, 108.7, 62.0, 61.7, 55.4, 55.3, 52.4, 48.5, 43.6, 43.2, 22.7, 22.4, 14.4;  $^{11}\text{B}$  NMR (128 MHz,  $\text{CDCl}_3$ )  $\delta$  -5.35; IR (neat): 3340, 2377, 1704, 1635, 1558, 1339, 1260, 1150, 749, 567  $\text{cm}^{-1}$ ; HRESIMS Calcd for  $[\text{C}_{24}\text{H}_{34}\text{BN}_3\text{NaO}_3\text{S}]^+$  ( $\text{M} + \text{Na}^+$ ) 478.2306, found 478.2311.

***N*-(4-(1-methylpyrrolidine-boranyl)-6-methyl-1,4-dihydroisoquinolin-3-yl)-*N*-ethyl-4-methoxybenzenesulfonamidee (**2o**)**

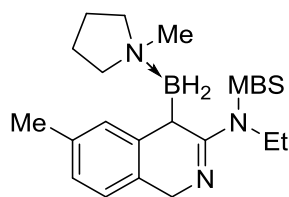

**2o**

Compound **2o** was prepared in 64% yield (87.4 mg) according to the general procedure (Table 2, entry 15). The product was isolated through silica gel column chromatography (PE:EA = 3:1) as a yellow oil.  $^1\text{H}$  NMR (400 MHz,  $\text{CDCl}_3$ )  $\delta$  7.69 (d,  $J = 8.8$  Hz, 2H), 7.03 – 6.89 (m, 5H), 4.69 – 4.58 (m, 2H), 3.98 (s, 1H), 3.82 – 3.77 (m, 5H), 3.12 – 3.07 (m, 1H), 2.91 – 2.87 (m, 1H), 2.78 – 2.73 (m, 1H), 2.66 – 2.62 (m, 1H), 2.57 (s, 3H), 2.30 (s, 3H), 1.97 – 1.86 (m, 4H), 1.29 (t,  $J = 7.2$  Hz, 3H);  $^{13}\text{C}$  NMR (100 MHz,  $\text{CDCl}_3$ )  $\delta$  171.7, 163.8, 134.6, 130.7, 130.0, 128.6, 127.9, 126.2, 125.3, 114.3, 62.5, 61.6, 55.7, 50.3, 47.9, 44.0, 22.5, 21.9, 20.9, 15.0;  $^{11}\text{B}$  NMR (128 MHz,  $\text{CDCl}_3$ )  $\delta$  -5.15; IR (neat): 3340, 2381, 1703, 1625, 1554, 1342, 1260, 1150, 750, 551  $\text{cm}^{-1}$ ; HRESIMS Calcd for  $[\text{C}_{24}\text{H}_{34}\text{BN}_3\text{NaO}_3\text{S}]^+$  ( $\text{M} + \text{Na}^+$ ) 478.2306, found 478.2302.

***N*-(4-(1-methylpyrrolidine-boranyl)-6-methoxy-1,4-dihydroisoquinolin-3-yl)-*N*-ethyl-4-methoxybenzenesulfonamide (2p)**

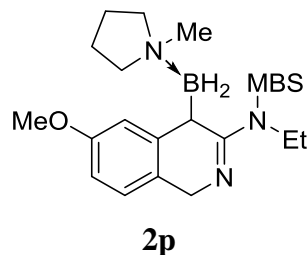

Compound **2p** was prepared in 80% yield (113.1 mg) according to the general procedure (Table 2, entry 16). The product was isolated through silica gel column chromatography (PE:EA = 3:1) as a yellow oil.  $^1\text{H}$  NMR (400 MHz,  $\text{CD}_3\text{OD}$ )  $\delta$  7.52 (d,  $J = 9.2$  Hz, 2H), 6.90 (d,  $J = 8.0$  Hz, 1H), 6.82 (d,  $J = 8.8$  Hz, 2H), 6.57 – 6.54 (m, 2H), 4.37 (dd,  $J = 28.4, 16.0$  Hz, 2H), 3.89 (s, 1H), 3.73 – 3.61 (m, 8H), 3.25 (s, 1H), 3.04 – 2.93 (m, 1H), 2.85 – 2.75 (m, 1H), 2.75 – 2.65 (m, 1H), 2.65 – 2.56 (m, 1H), 2.46 (s, 3H), 1.88 – 1.73 (m, 4H), 1.15 (t,  $J = 7.2$  Hz, 3H);  $^{13}\text{C}$  NMR (100 MHz,  $\text{CD}_3\text{OD}$ )  $\delta$  173.5, 165.7, 160.8, 145.5, 131.7, 127.8, 126.5, 115.9, 112.9, 111.6, 64.0, 63.4, 56.9, 56.0, 52.8, 45.6, 24.2, 23.7, 16.0;  $^{11}\text{B}$  NMR (128 MHz,  $\text{CD}_3\text{OD}$ )  $\delta$  -5.39; IR (neat): 2919, 2379, 1573, 1506, 1372, 1272, 1174, 1067, 744, 585  $\text{cm}^{-1}$ ; HRESIMS Calcd for  $[\text{C}_{24}\text{H}_{34}\text{BN}_3\text{NaO}_4\text{S}]^+$  ( $\text{M} + \text{Na}^+$ ) 494.2255, found 494.2247.

***N*-(4-(1-methylpiperidine-boranyl)-1,4-dihydroisoquinolin-3-yl)-*N*-ethyl-4-methoxybenzenesulfonamide (2q)**

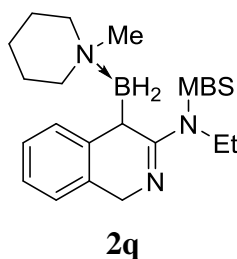

Compound **2q** was prepared in 75% yield (102.4 mg) according to the general procedure. The product was isolated through silica gel column chromatography (PE:EA = 3:1) as a pale yellow oil.  $^1\text{H}$  NMR (400 MHz,  $\text{CDCl}_3$ )  $\delta$  7.45 (d,  $J = 8.8$  Hz, 2H), 7.15 – 7.05 (m, 4H), 6.70 (d,  $J = 8.8$  Hz, 2H), 4.55 (s, 2H), 4.12 (s, 1H), 3.74 – 3.60 (m, 5H), 3.07 – 2.97 (m, 2H), 2.89 – 2.78 (m, 2H), 2.65 (s, 3H), 1.80 – 1.77 (m, 1H), 1.71 – 1.63

(m, 4H), 1.47 – 1.44 (m, 1H), 1.24 (t,  $J = 7.2$  Hz, 3H);  $^{13}\text{C}$  NMR (100 MHz, Acetone- $d_6$ )  $\delta$  170.0, 164.0, 145.2, 134.8, 132.1, 130.7, 127.0, 126.3, 126.0, 124.8, 114.7, 59.4, 59.3, 56.2, 53.4, 46.7, 44.2, 42.5, 23.4, 21.0, 20.9, 15.3;  $^{11}\text{B}$  NMR (128 MHz,  $\text{CDCl}_3$ )  $\delta$  -4.30; IR (neat): 3447, 1704, 1635, 1581, 1497, 1339, 1260, 750, 671  $\text{cm}^{-1}$ ; HRESIMS Calcd for  $[\text{C}_{24}\text{H}_{35}\text{BN}_3\text{NaO}_3\text{S}]^+$  ( $\text{M} + \text{H}^+$ ) 456.2487, found 456.2493.

***N*-(4-(trimethylamine-boranyl)-1,4-dihydroisoquinolin-3-yl)-*N*-ethyl-4-methoxybenzenesulfonamide (2r)**

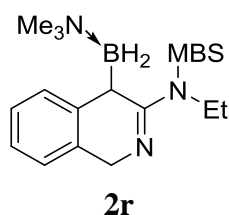

Compound **2r** was prepared in 80% yield (99.6 mg) according to the general procedure. The product was isolated through silica gel column chromatography (PE:EA = 3:1) as a pale yellow oil.  $^1\text{H}$  NMR (400 MHz,  $\text{CDCl}_3$ )  $\delta$  7.48 (d,  $J = 8.8$  Hz, 2H), 7.14 – 7.12 (m, 1H), 7.08 – 7.06 (m, 3H), 6.73 (d,  $J = 8.8$  Hz, 2H), 4.56 (s, 2H), 4.11 (s, 1H), 3.75 (s, 3H), 3.72 – 3.64 (m, 2H), 2.65 (s, 9H), 1.24 (t,  $J = 7.2$  Hz, 3H);  $^{13}\text{C}$  NMR (100 MHz,  $\text{CDCl}_3$ )  $\delta$  169.2, 162.7, 143.5, 133.3, 129.6(9), 129.6(5), 126.3, 125.2, 124.9, 124.1, 113.7, 55.4, 52.9, 52.6, 43.6, 42.5, 14.4;  $^{11}\text{B}$  NMR (128 MHz,  $\text{CDCl}_3$ )  $\delta$  -6.27; IR (neat): 3340, 2381, 1704, 1635, 1558, 1339, 1260, 1087, 749  $\text{cm}^{-1}$ ; HRESIMS Calcd for  $[\text{C}_{21}\text{H}_{30}\text{BN}_3\text{NaO}_3\text{S}]^+$  ( $\text{M} + \text{Na}^+$ ) 438.1993, found 438.1998.

**Gram-scale synthesis of 2a**

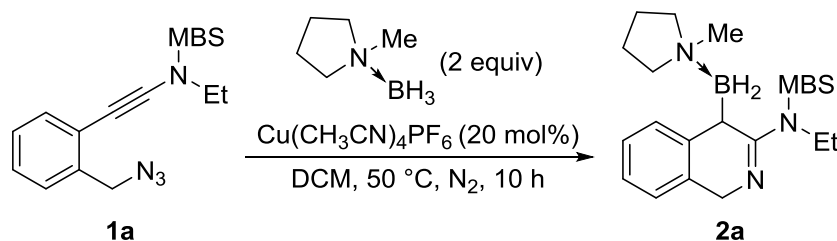

$\text{Cu}(\text{CH}_3\text{CN})_4\text{PF}_6$  (0.24 g, 0.64 mmol) was added to a solution of the azide-ynamide **1a** (1.18 g, 3.2 mmol) and borane (0.63 g, 6.4 mmol) in DCM (10 mL) in a 50 mL sealed tube under  $\text{N}_2$  atmosphere. The reaction mixture was stirred at 50  $^\circ\text{C}$  for 10 h. Upon

completion, the mixture was then concentrated and the residue was purified by chromatography on silica gel (PE:EA = 3:1) to afford the desired organoboron compound **2a** (0.96 g, 68% yield).

### *N*-(1,4-dihydroisoquinolin-3-yl)-*N*-ethyl-4-methoxybenzenesulfonamide (**3**)

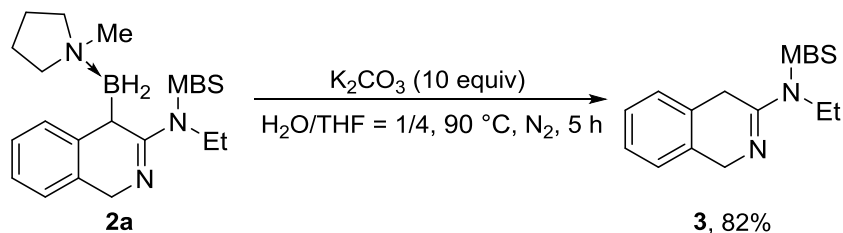

Compound **3** was prepared in 82% yield (56.5 mg) according to the following procedure. The powdered potassium carbonate (276 mg, 2.0 mmol) was introduced to a Schlenk tube under argon atmosphere, followed by a solution of **2a** (88.3 mg, 0.2 mmol) in THF (2 mL) and H<sub>2</sub>O (0.5 mL) was injected into the Schlenk tube. The reaction mixture were stirred at 90 °C for 5 hours. After completion, the mixture was concentrated and purified by flash chromatography on silica gel (PE:EA = 5:1) to give **3** as a yellow oil. <sup>1</sup>H NMR (400 MHz, CDCl<sub>3</sub>) δ 7.72 (d, *J* = 8.8 Hz, 2H), 7.24 – 7.21 (m, 2H), 7.17– 7.12 (m, 2H), 6.94 (d, *J* = 8.8 Hz, 2H), 4.73 (t, *J* = 3.2 Hz, 2H), 3.85 – 3.82 (m, 5H), 3.71 (q, *J* = 7.2 Hz, 2H), 1.16 (t, *J* = 7.2 Hz, 3H); <sup>13</sup>C NMR (100 MHz, CDCl<sub>3</sub>) δ 163.0, 156.0, 133.1, 131.3, 131.0, 129.4, 127.2, 127.0, 126.8, 125.1, 114.2, 55.6, 52.6, 43.0, 34.7, 14.2; IR (neat): 2982, 1908, 1693, 1521, 1407, 1294, 1086, 842, 711, 540 cm<sup>-1</sup>; HRESIMS Calcd for [C<sub>18</sub>H<sub>20</sub>N<sub>2</sub>NaO<sub>3</sub>S]<sup>+</sup> (M + Na<sup>+</sup>) 367.1087, found 367.1085.

### *N*-ethyl-*N*-(isoquinolin-3-yl)-4-methoxybenzenesulfonamide

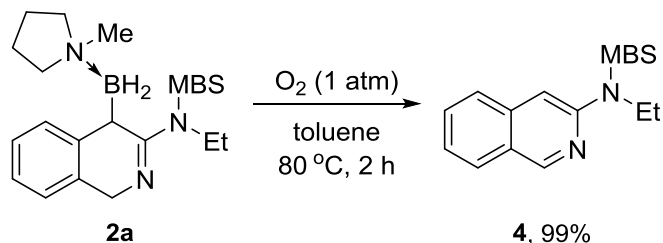

Compound **4** was prepared in 99% yield (67.8 mg) according to the following procedures. **2a** (88.3 mg, 0.2 mmol) in toluene (5 mL) was introduced to an oven-dried eggplant-shaped bottle. Then the mixture was heated to 80 °C for 2 hours with an



oxygen ball. Upon completion, the mixture was then concentrated and the residue was purified by chromatography on silica gel (PE:EA = 3:1) to afford the desired **4** as a pale yellow oil.  $^1\text{H}$  NMR (400 MHz,  $\text{CDCl}_3$ )  $\delta$  9.00 (s, 1H), 7.97 – 7.86 (m, 3H), 7.71 (t,  $J$  = 7.2 Hz, 1H), 7.60 (t,  $J$  = 7.2 Hz, 1H), 7.55 (d,  $J$  = 8.8 Hz, 2H), 6.88 (d,  $J$  = 8.8 Hz, 2H), 3.93 – 3.78 (m, 5H), 1.11 (t,  $J$  = 7.2 Hz, 3H);  $^{13}\text{C}$  NMR (100 MHz,  $\text{CDCl}_3$ )  $\delta$  162.8, 151.4, 146.6, 137.2, 130.7, 130.5, 129.7, 127.4(4), 127.3(9), 127.3, 127.0, 120.4, 113.9, 55.5, 43.3, 14.1; IR (neat): 3081, 1711, 1605, 1559, 1422, 1332, 1112, 957, 714, 517  $\text{cm}^{-1}$ ; HRESIMS Calcd for  $[\text{C}_{18}\text{H}_{18}\text{N}_2\text{NaO}_3\text{S}]^+$  ( $\text{M} + \text{Na}^+$ ) 365.0930, found 365.0921.

#### Reference:

1. W.-B. Shen, B. Zhou, Z.-X. Zhang, H. Yuan, W. Fang and L.-W. Ye, *Org. Chem. Front.*, 2018, **5**, 2468–2472.
2. Y. Pan, G.-W. Chen, C.-H. Shen, W. He, L.-W. Ye, *Org. Chem. Front.*, 2016, **3**, 491–495.

7.914  
7.893  
7.411  
7.395  
7.339  
7.298  
7.284  
7.271  
7.029  
7.007

4.454

3.871  
3.538  
3.520  
3.502  
3.485

1.310  
1.292  
1.275

| Parameter                | Value               |
|--------------------------|---------------------|
| 1 Title                  | wcy-3-model-II      |
| 2 Origin                 | Bruker BioSpin GmbH |
| 3 Solvent                | CDCl3               |
| 4 Temperature            | 298.0               |
| 5 Number of Scans        | 7                   |
| 6 Acquisition Time       | 4.0894              |
| 7 Acquisition Date       | 2021-11-27T13:53:51 |
| 8 Spectrometer Frequency | 400.13              |
| 9 Spectral Width         | 8012.8              |

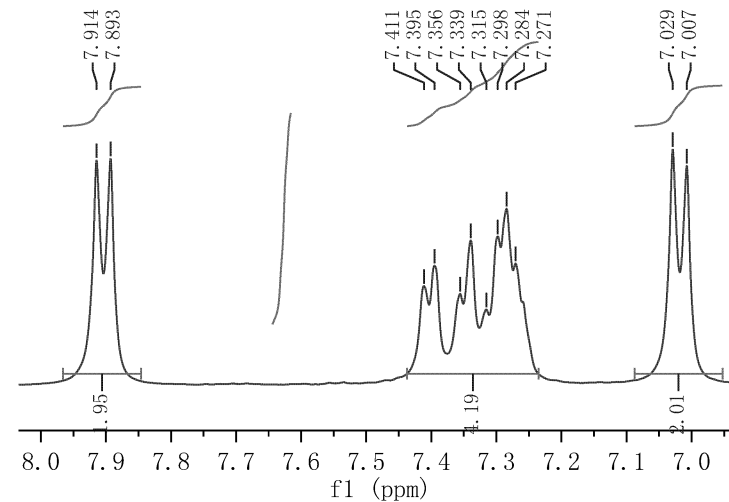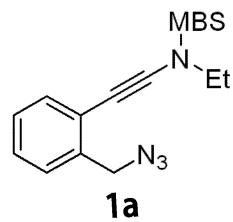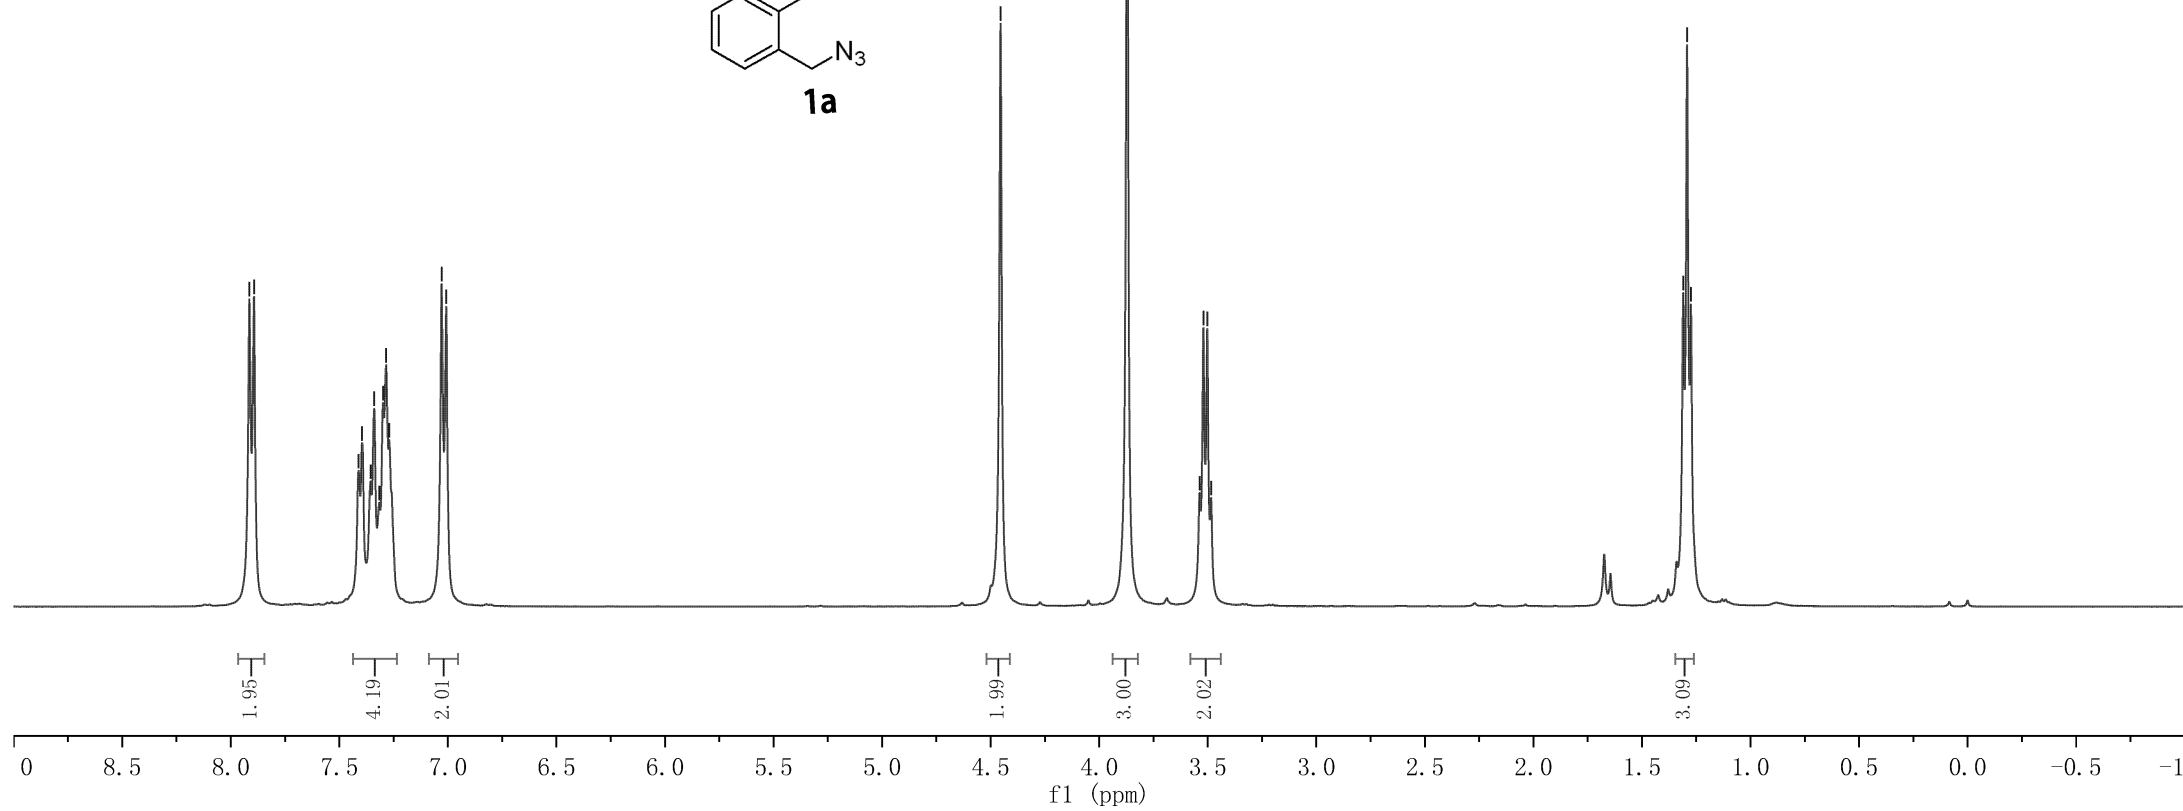

| Parameter                | Value               |
|--------------------------|---------------------|
| 1 Title                  | wcy-3-model-C       |
| 2 Origin                 | Bruker BioSpin GmbH |
| 3 Solvent                | CDC13               |
| 4 Temperature            | 300.0               |
| 5 Number of Scans        | 18                  |
| 6 Acquisition Time       | 1.3631              |
| 7 Acquisition Date       | 2021-11-27T13:54:55 |
| 8 Spectrometer Frequency | 100.61              |
| 9 Spectral Width         | 24038.5             |

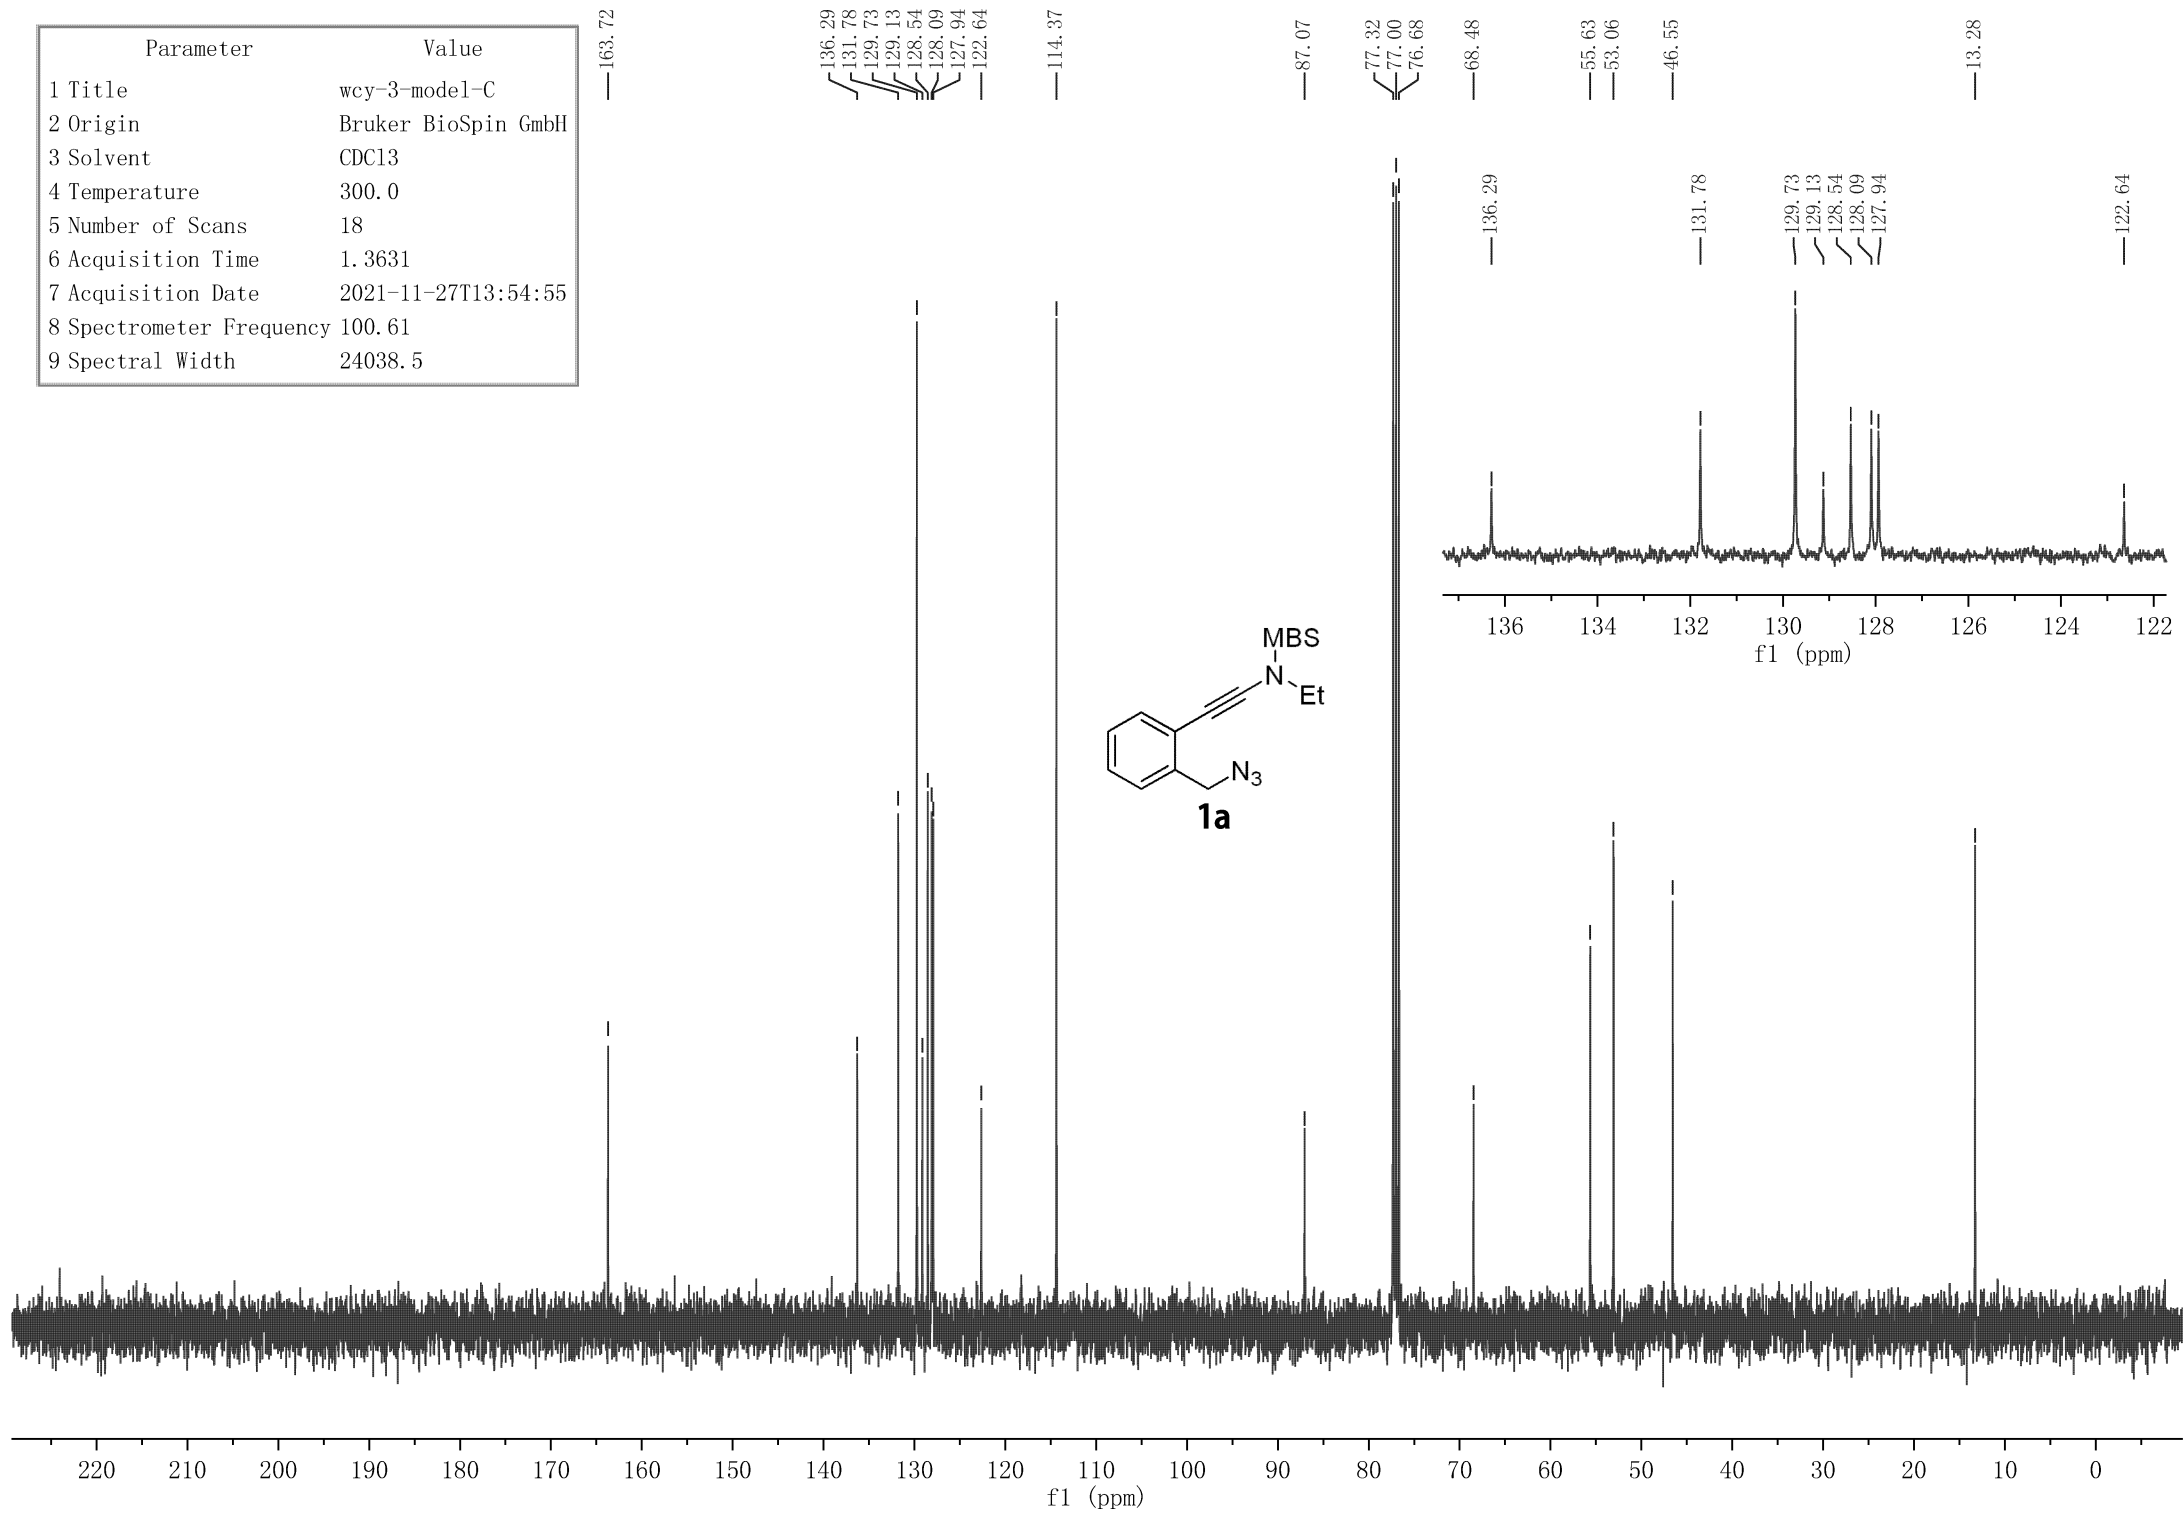

7.861  
7.841  
7.405  
7.389  
7.384  
7.371  
7.349  
7.329  
7.291  
7.277  
7.272  
7.268  
7.261  
7.249

4.439

3.535  
3.517  
3.499  
3.481

2.411

1.294  
1.276  
1.258

| Parameter                | Value               |
|--------------------------|---------------------|
| 1 Title                  | TsEt-Sub-III        |
| 2 Origin                 | Bruker BioSpin GmbH |
| 3 Solvent                | CDC13               |
| 4 Temperature            | 298.0               |
| 5 Number of Scans        | 11                  |
| 6 Acquisition Time       | 4.0894              |
| 7 Acquisition Date       | 2021-09-13T18:12:02 |
| 8 Spectrometer Frequency | 400.13              |
| 9 Spectral Width         | 8012.8              |

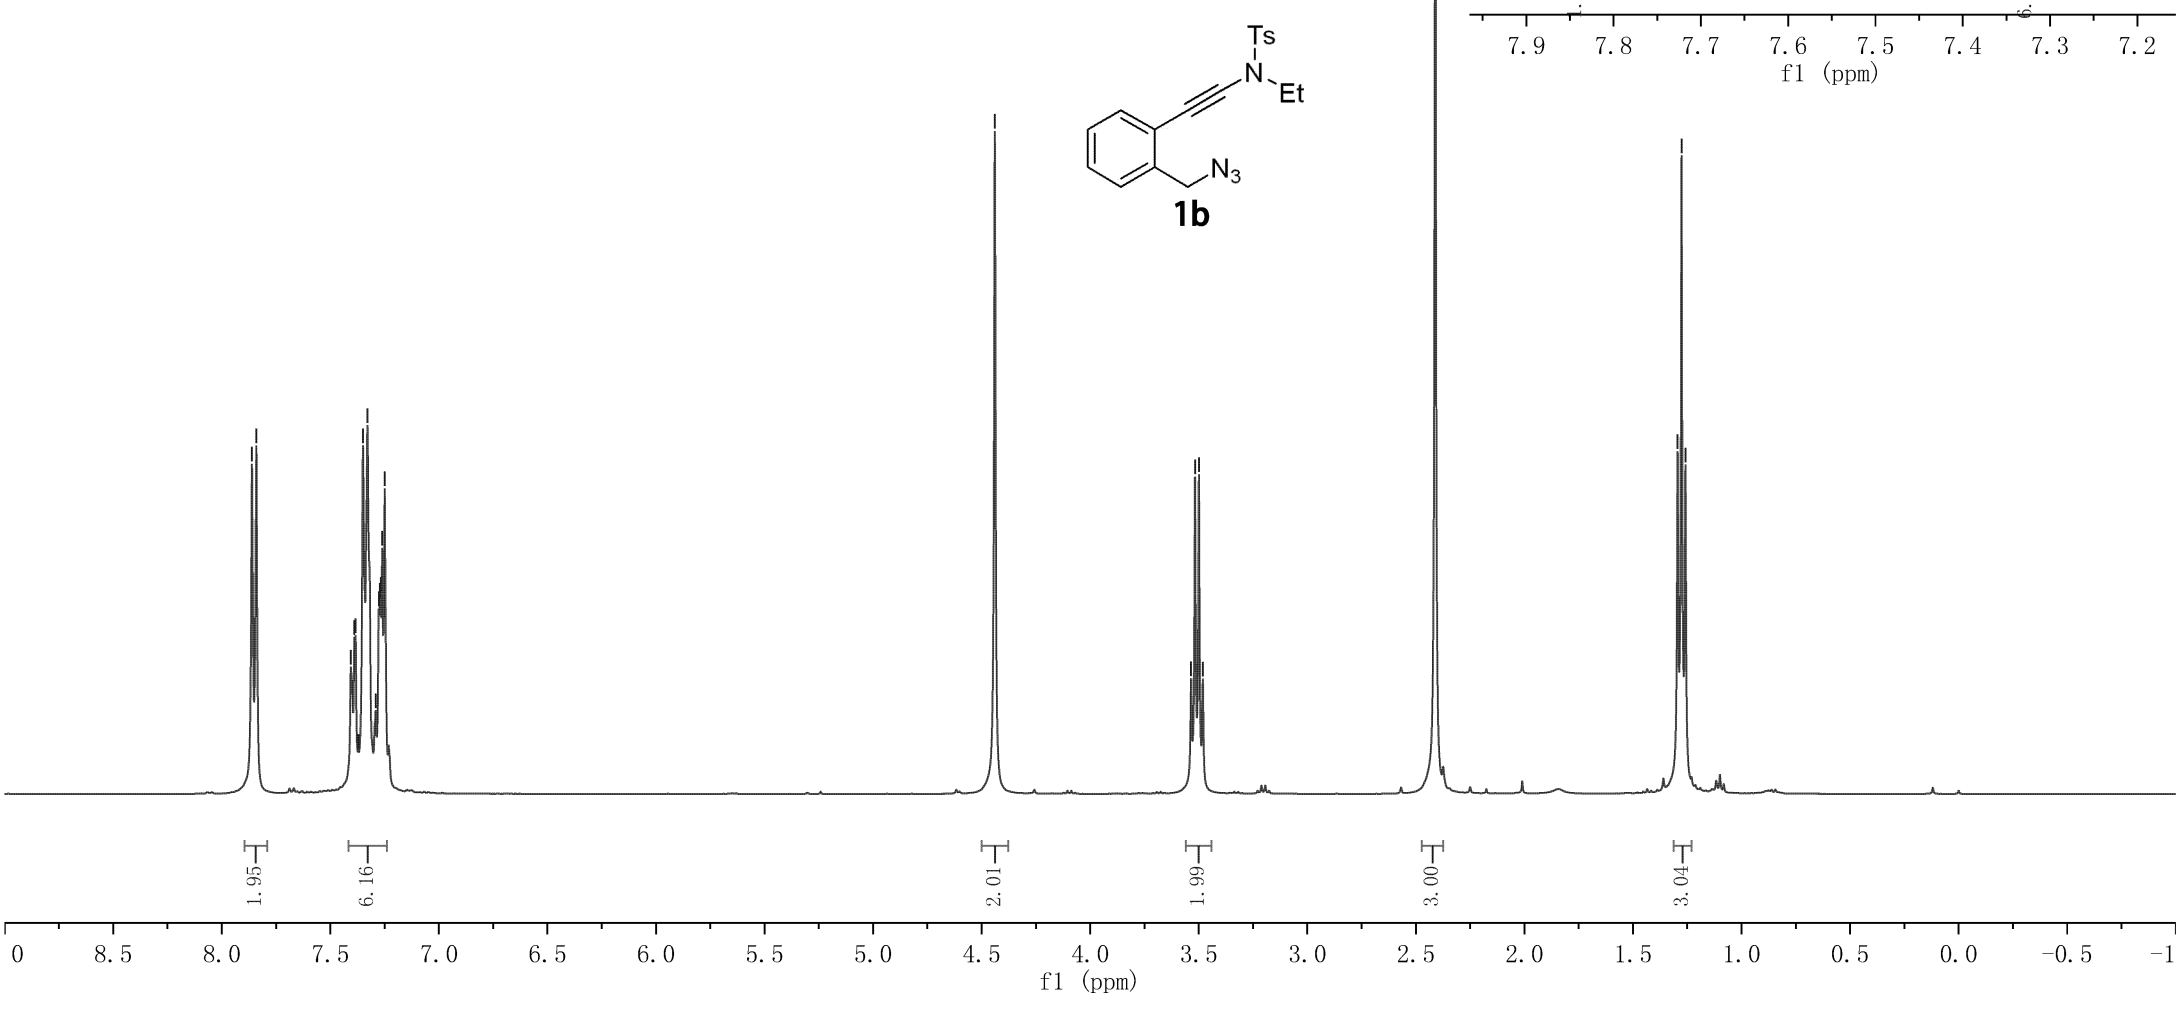

| Parameter                | Value               |
|--------------------------|---------------------|
| 1 Title                  | TsEt-Sub-C          |
| 2 Origin                 | Bruker BioSpin GmbH |
| 3 Solvent                | CDCl3               |
| 4 Temperature            | 300.0               |
| 5 Number of Scans        | 19                  |
| 6 Acquisition Time       | 1.3631              |
| 7 Acquisition Date       | 2021-09-13T18:13:56 |
| 8 Spectrometer Frequency | 100.61              |
| 9 Spectral Width         | 24038.5             |

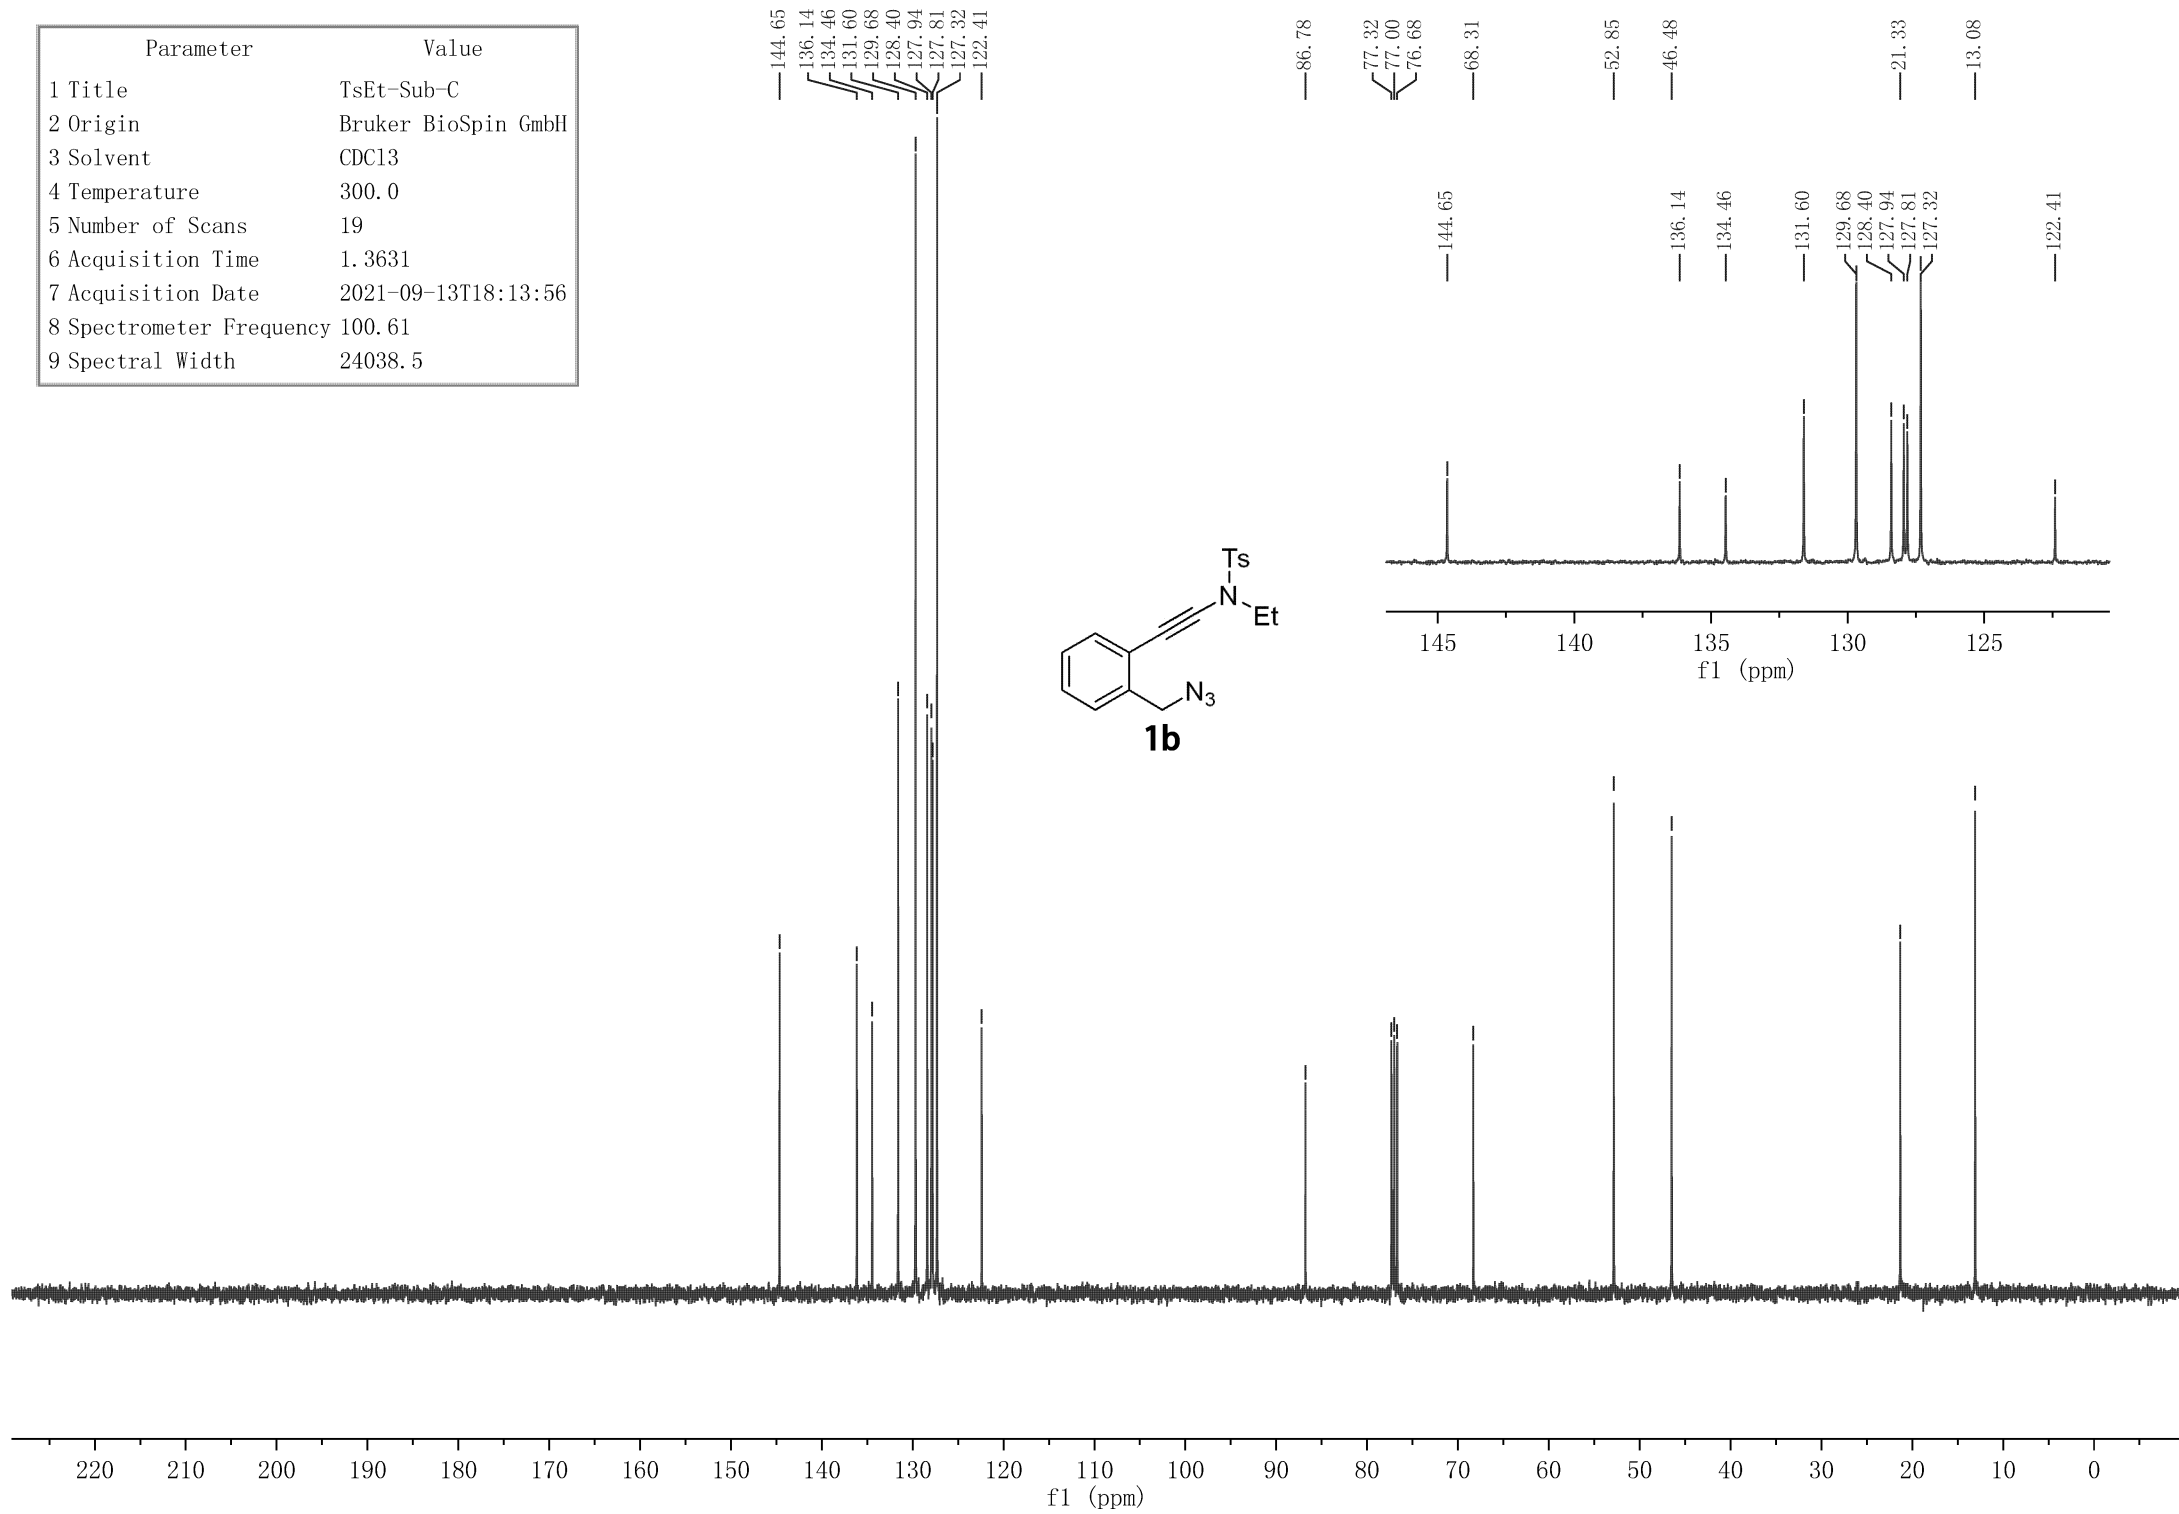

| Parameter                | Value               |
|--------------------------|---------------------|
| 1 Title                  | BsEt-Sub-III        |
| 2 Origin                 | Bruker BioSpin GmbH |
| 3 Solvent                | CDCl3               |
| 4 Temperature            | 298.0               |
| 5 Number of Scans        | 4                   |
| 6 Acquisition Time       | 4.0894              |
| 7 Acquisition Date       | 2021-10-09T08:15:20 |
| 8 Spectrometer Frequency | 400.13              |
| 9 Spectral Width         | 8012.8              |

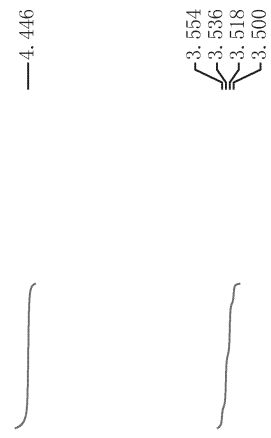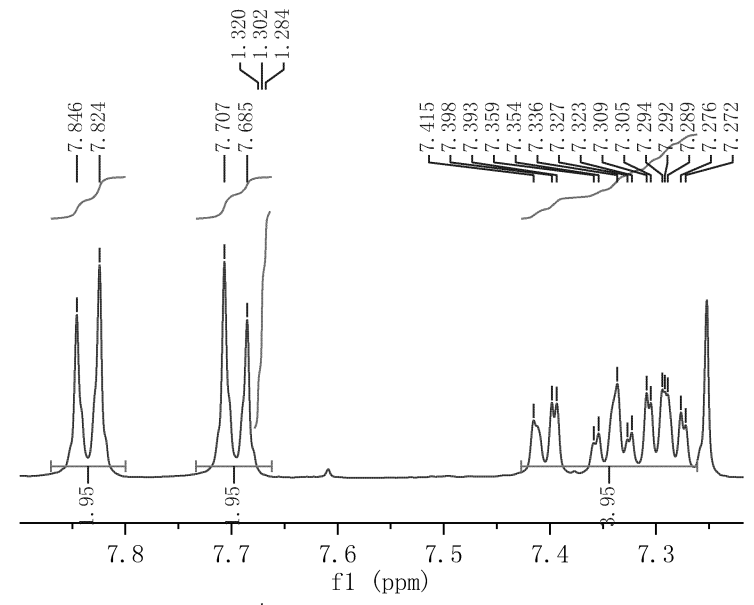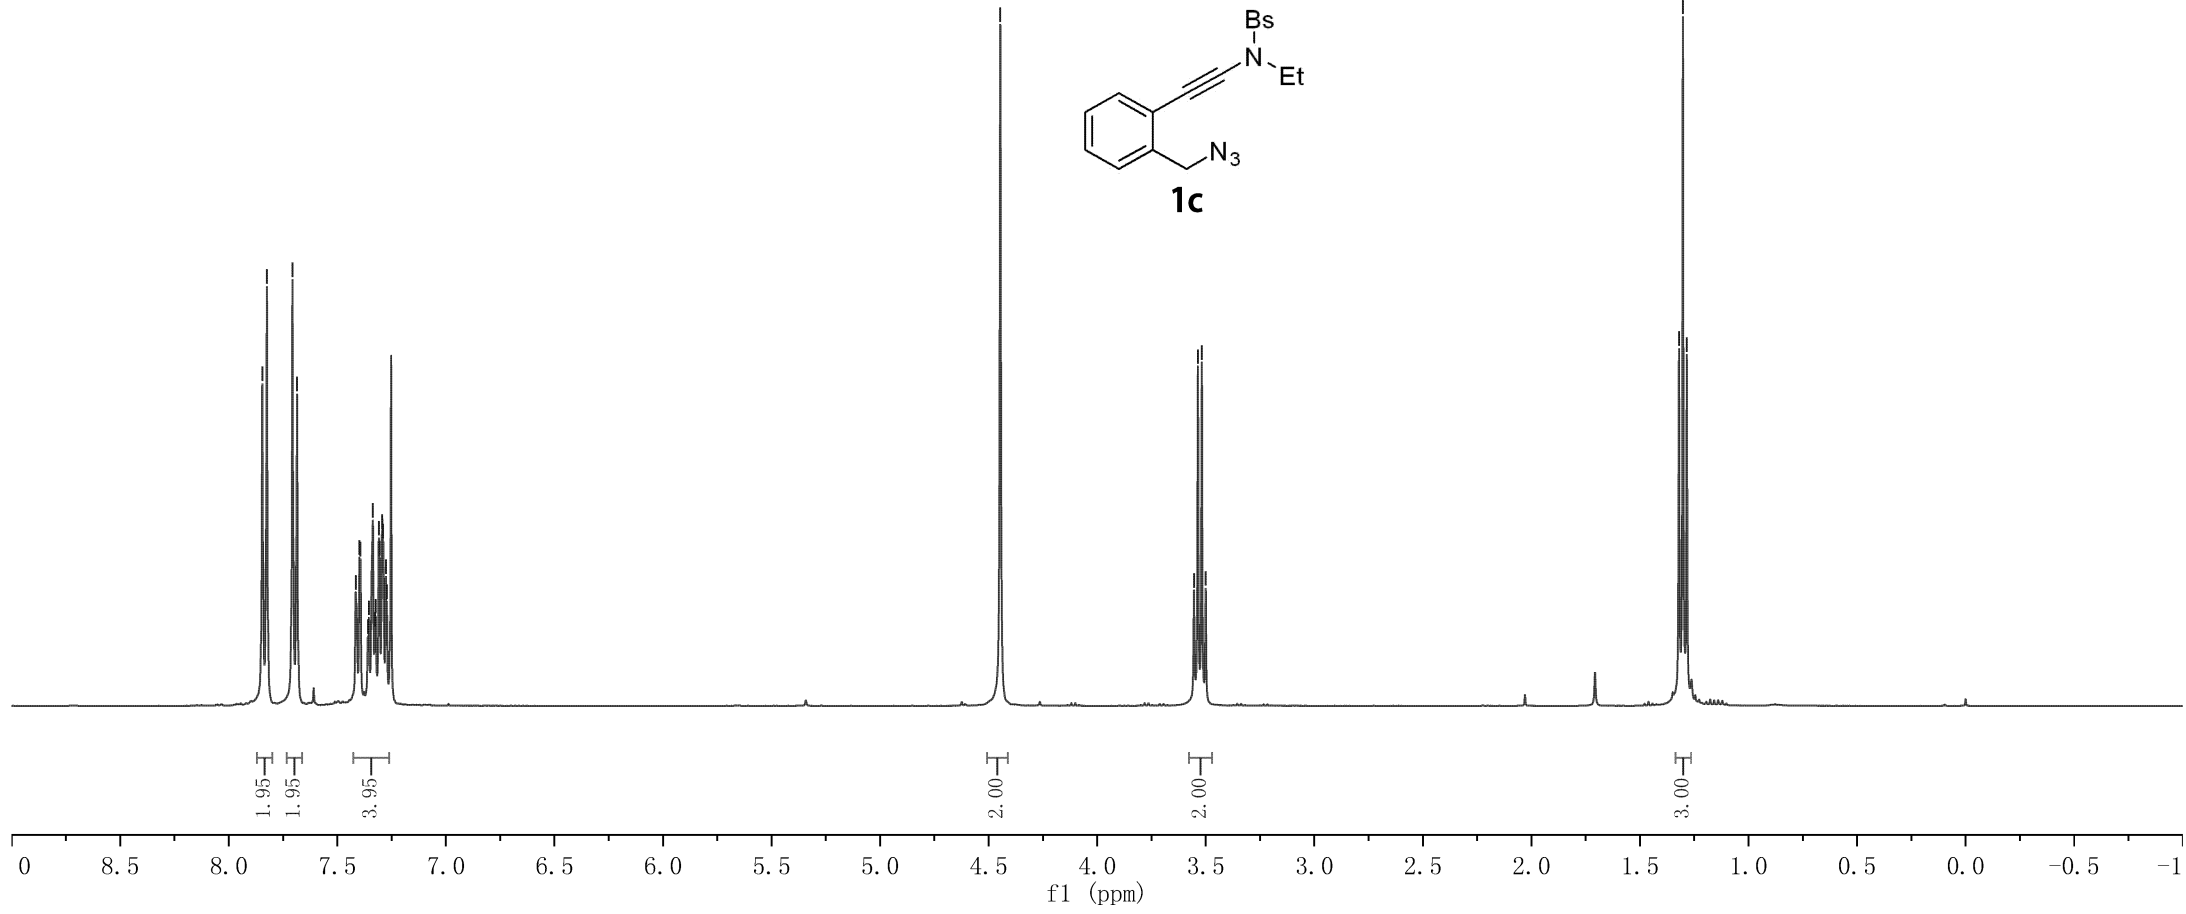

| Parameter                | Value               |
|--------------------------|---------------------|
| 1 Title                  | 1c-C                |
| 2 Origin                 | Bruker BioSpin GmbH |
| 3 Solvent                | CDCl3               |
| 4 Temperature            | 300.0               |
| 5 Number of Scans        | 5                   |
| 6 Acquisition Time       | 1.3631              |
| 7 Acquisition Date       | 2021-10-09T08:16:11 |
| 8 Spectrometer Frequency | 100.61              |
| 9 Spectral Width         | 24038.5             |

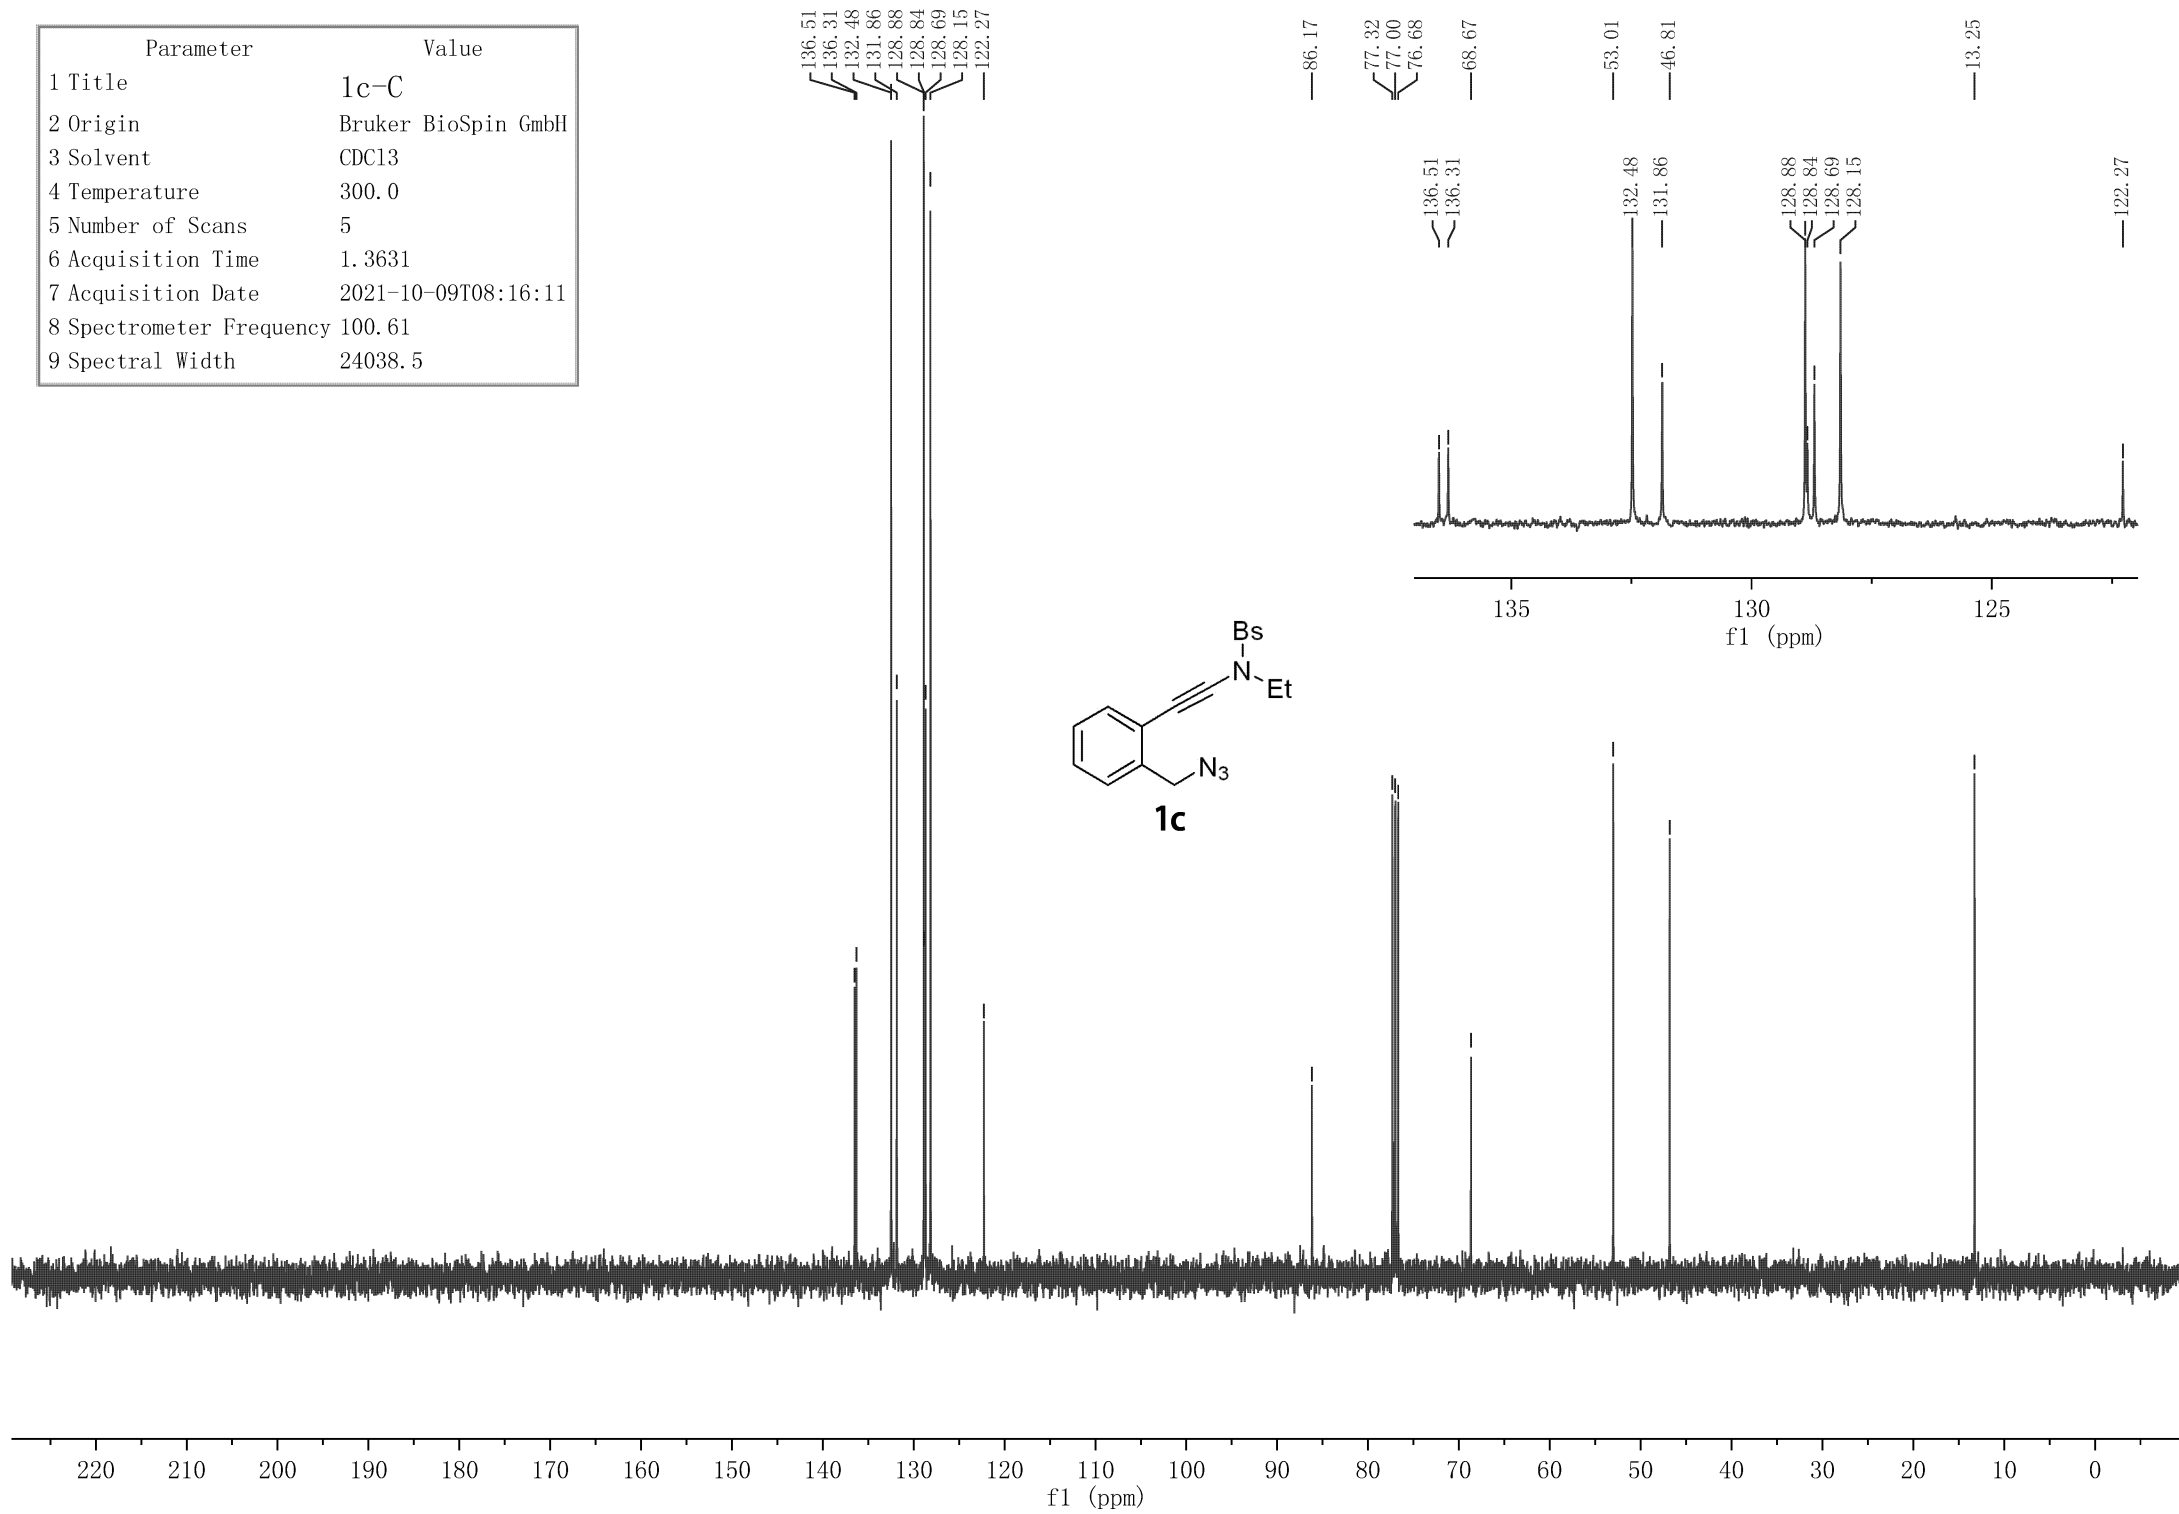

7.982  
7.963  
7.649  
7.630  
7.612  
7.563  
7.543  
7.524  
7.408  
7.391  
7.386  
7.338  
7.334  
7.317  
7.293  
7.279  
7.275  
7.269  
7.263  
7.256  
7.250  
7.243

| Parameter                | Value               |
|--------------------------|---------------------|
| 1 Title                  | wcy-4-13-H          |
| 2 Origin                 |                     |
| 3 Solvent                | CDCl3               |
| 4 Temperature            | 297.3               |
| 5 Number of Scans        | 16                  |
| 6 Acquisition Time       | 4.0002              |
| 7 Acquisition Date       | 2022-01-18T10:32:12 |
| 8 Spectrometer Frequency | 399.93              |
| 9 Spectral Width         | 8012.0              |

4.432

3.546  
3.528  
3.510  
3.492

1.291  
1.273  
1.254

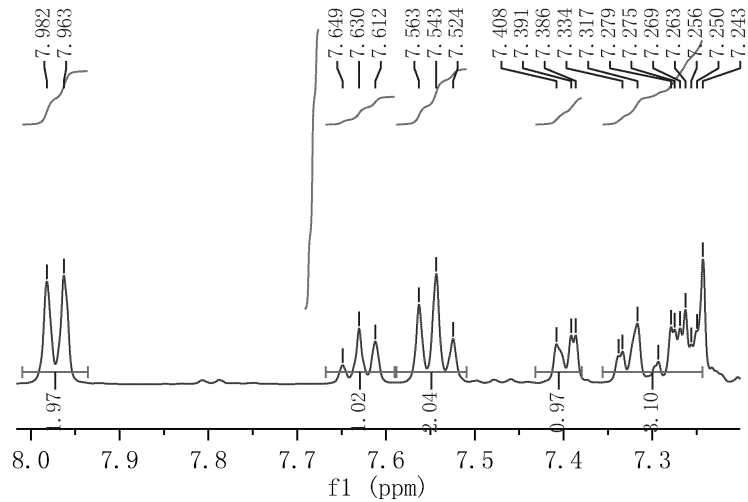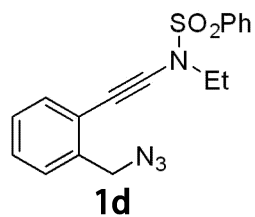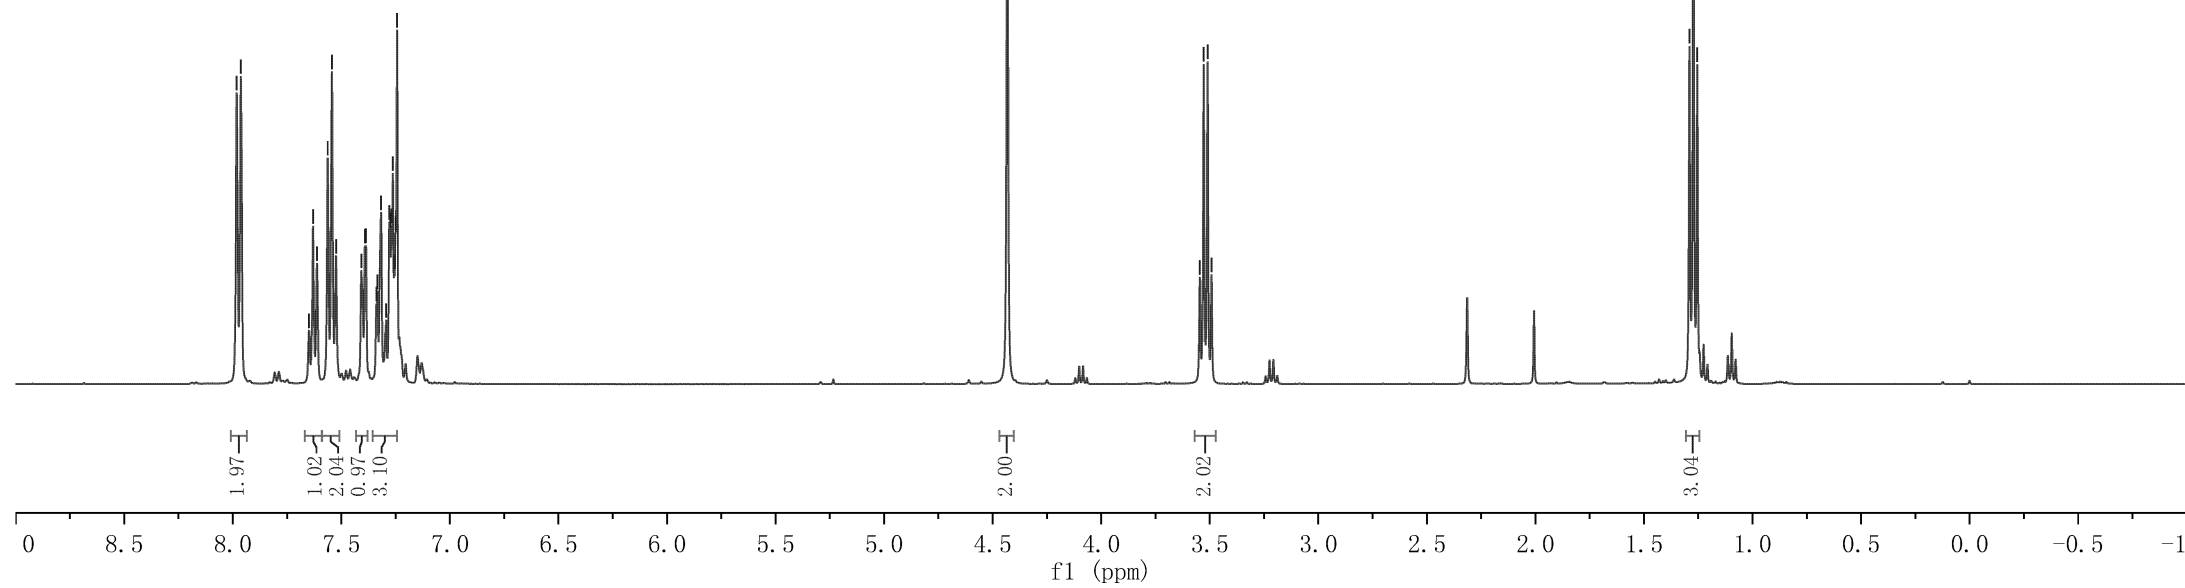



| Parameter                | Value               |
|--------------------------|---------------------|
| 1 Title                  | wcy-4-13-C          |
| 2 Origin                 |                     |
| 3 Solvent                | CDC13               |
| 4 Temperature            | 297.3               |
| 5 Number of Scans        | 200                 |
| 6 Acquisition Time       | 1.0000              |
| 7 Acquisition Date       | 2022-01-18T10:40:04 |
| 8 Spectrometer Frequency | 100.56              |
| 9 Spectral Width         | 26041.0             |

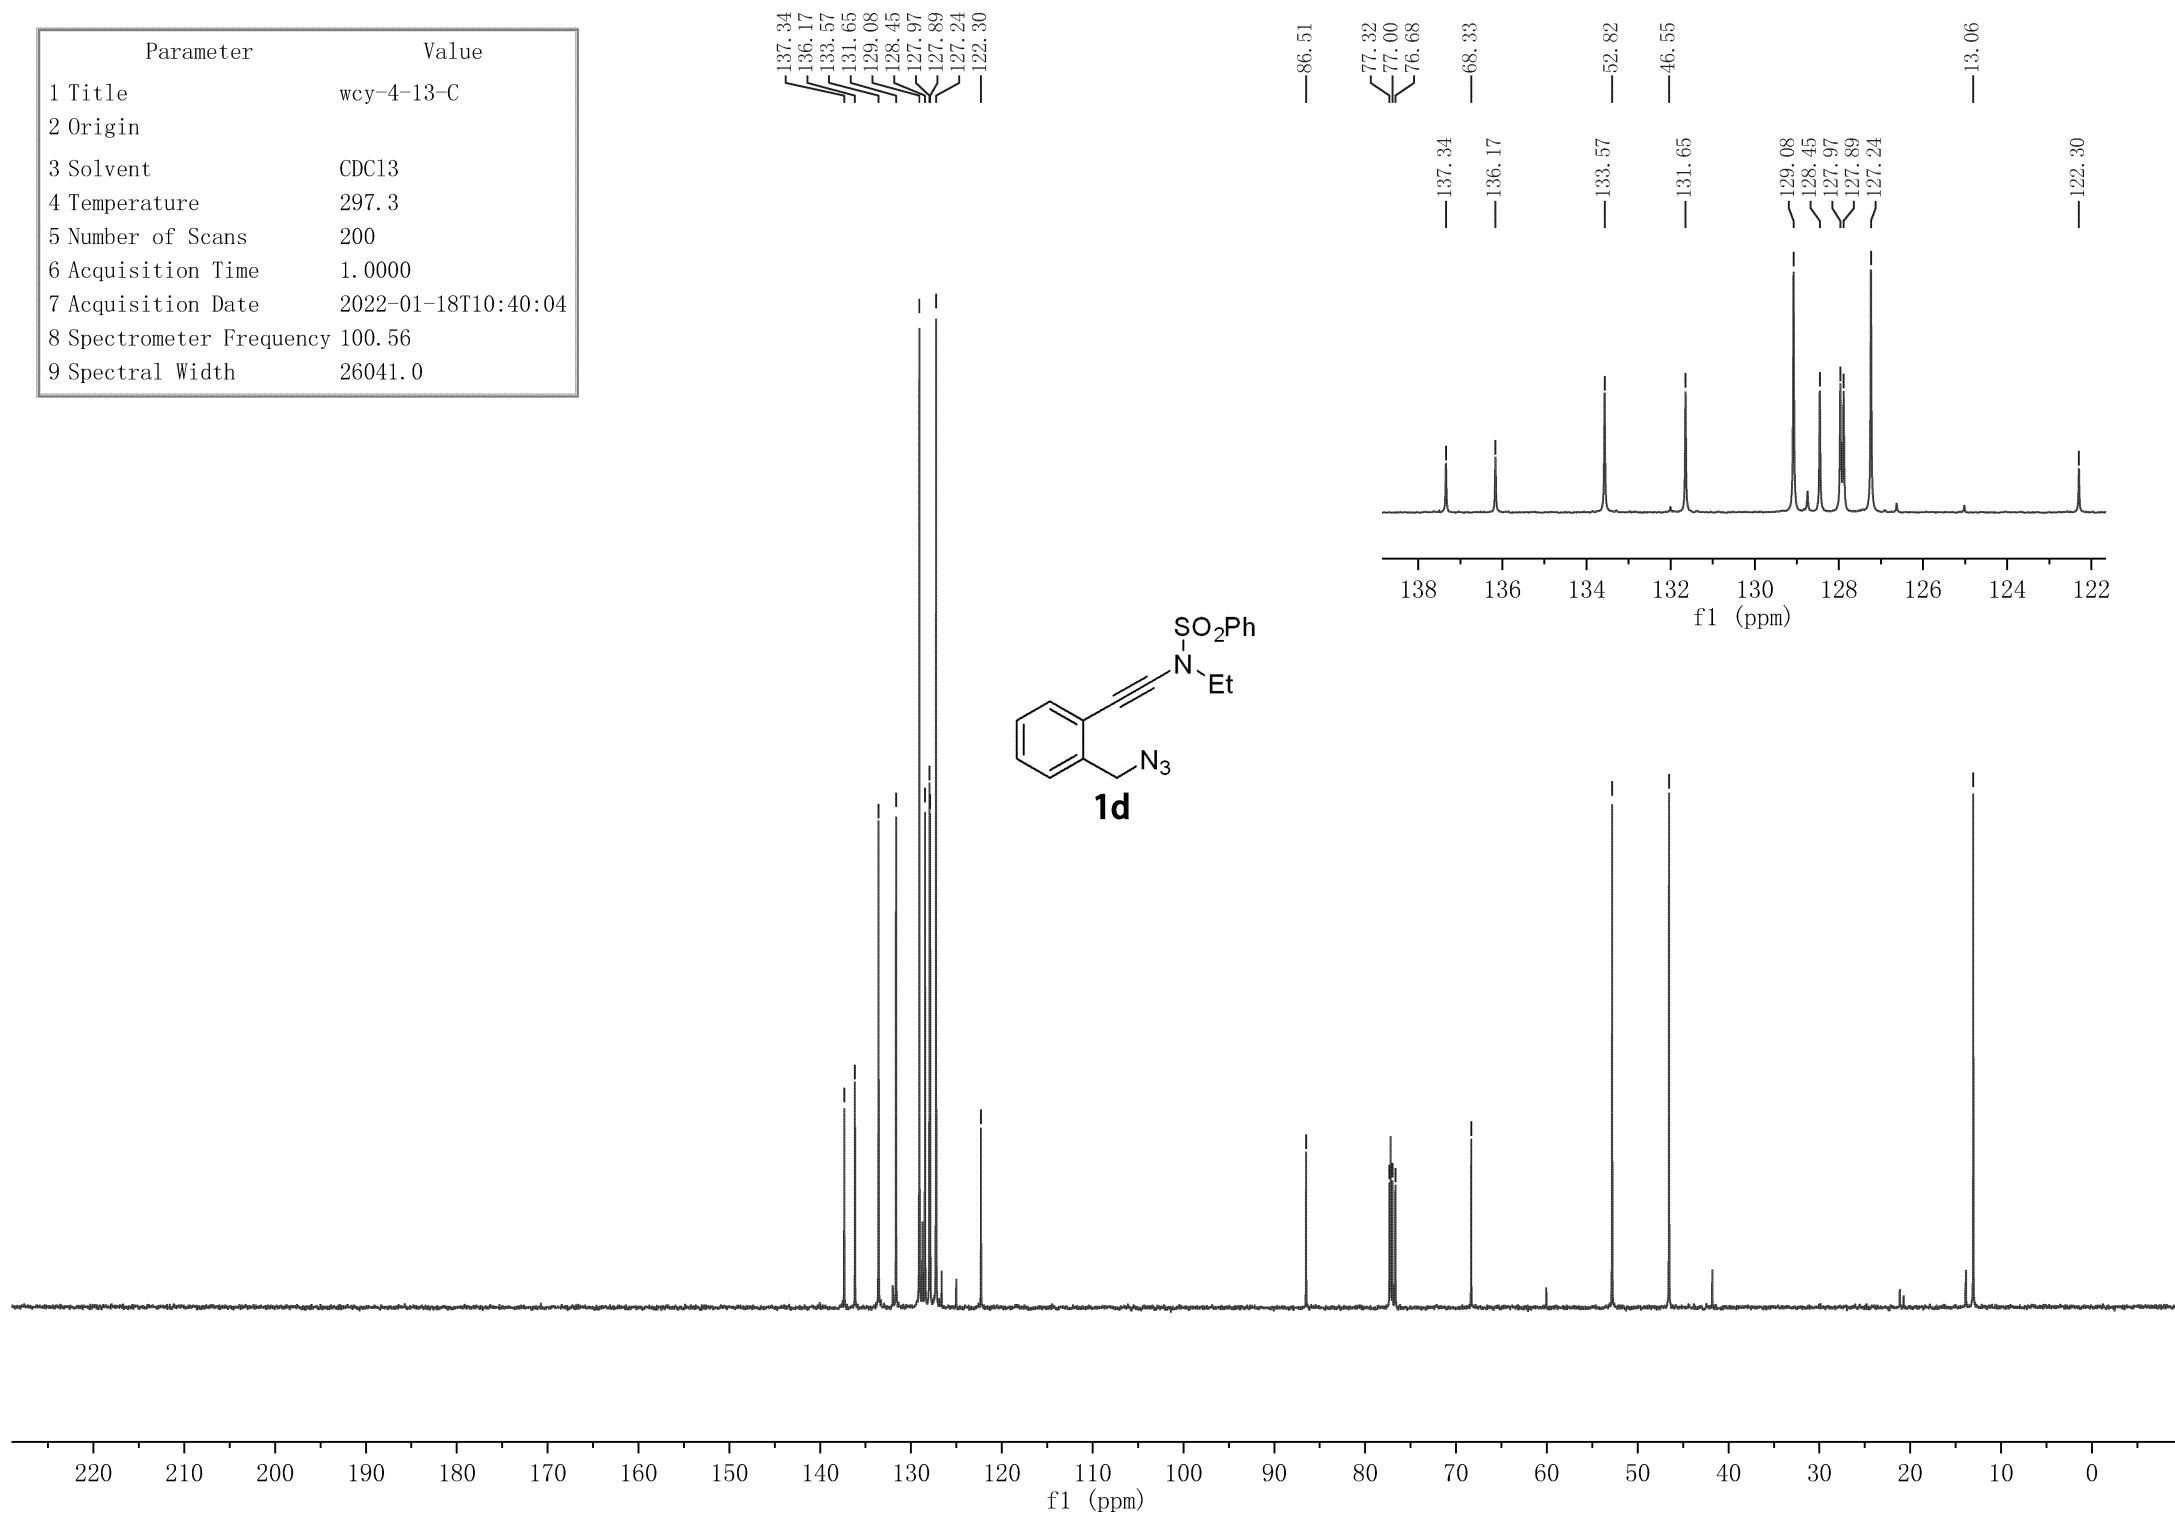

7.913  
7.890  
7.380  
7.327  
7.296  
7.279  
7.274  
7.258  
7.044  
7.022

| Parameter                | Value               |
|--------------------------|---------------------|
| 1 Title                  | zgy-9-MBSMe         |
| 2 Origin                 | Bruker BioSpin GmbH |
| 3 Solvent                | CDC13               |
| 4 Temperature            | 298.0               |
| 5 Number of Scans        | 9                   |
| 6 Acquisition Time       | 4.0894              |
| 7 Acquisition Date       | 2022-01-20T16:59:41 |
| 8 Spectrometer Frequency | 400.13              |
| 9 Spectral Width         | 8012.8              |

4.448

3.873

3.172

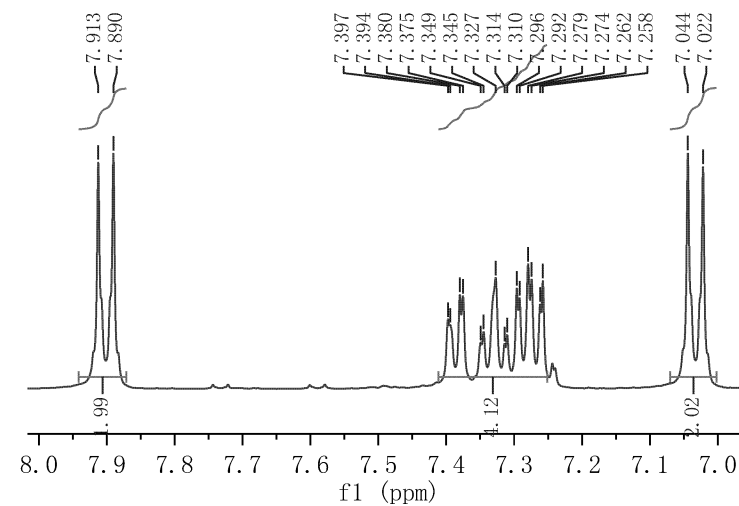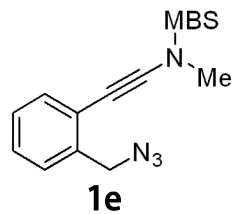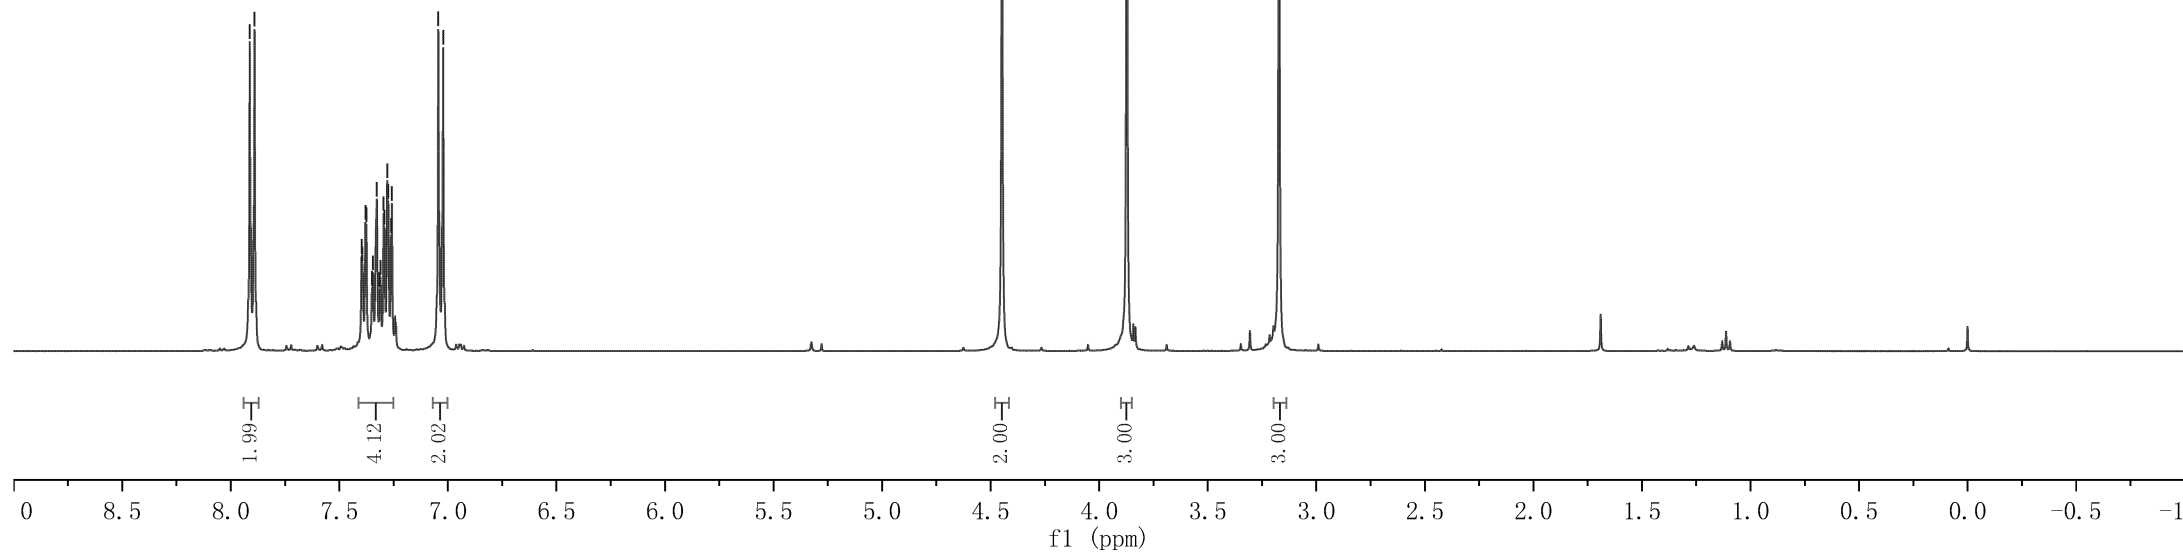

| Parameter                | Value               |
|--------------------------|---------------------|
| 1 Title                  | zgy-9-MBSMe-C       |
| 2 Origin                 | Bruker BioSpin GmbH |
| 3 Solvent                | CDC13               |
| 4 Temperature            | 300.0               |
| 5 Number of Scans        | 20                  |
| 6 Acquisition Time       | 1.3631              |
| 7 Acquisition Date       | 2022-01-20T17:02:18 |
| 8 Spectrometer Frequency | 100.61              |
| 9 Spectral Width         | 24038.5             |

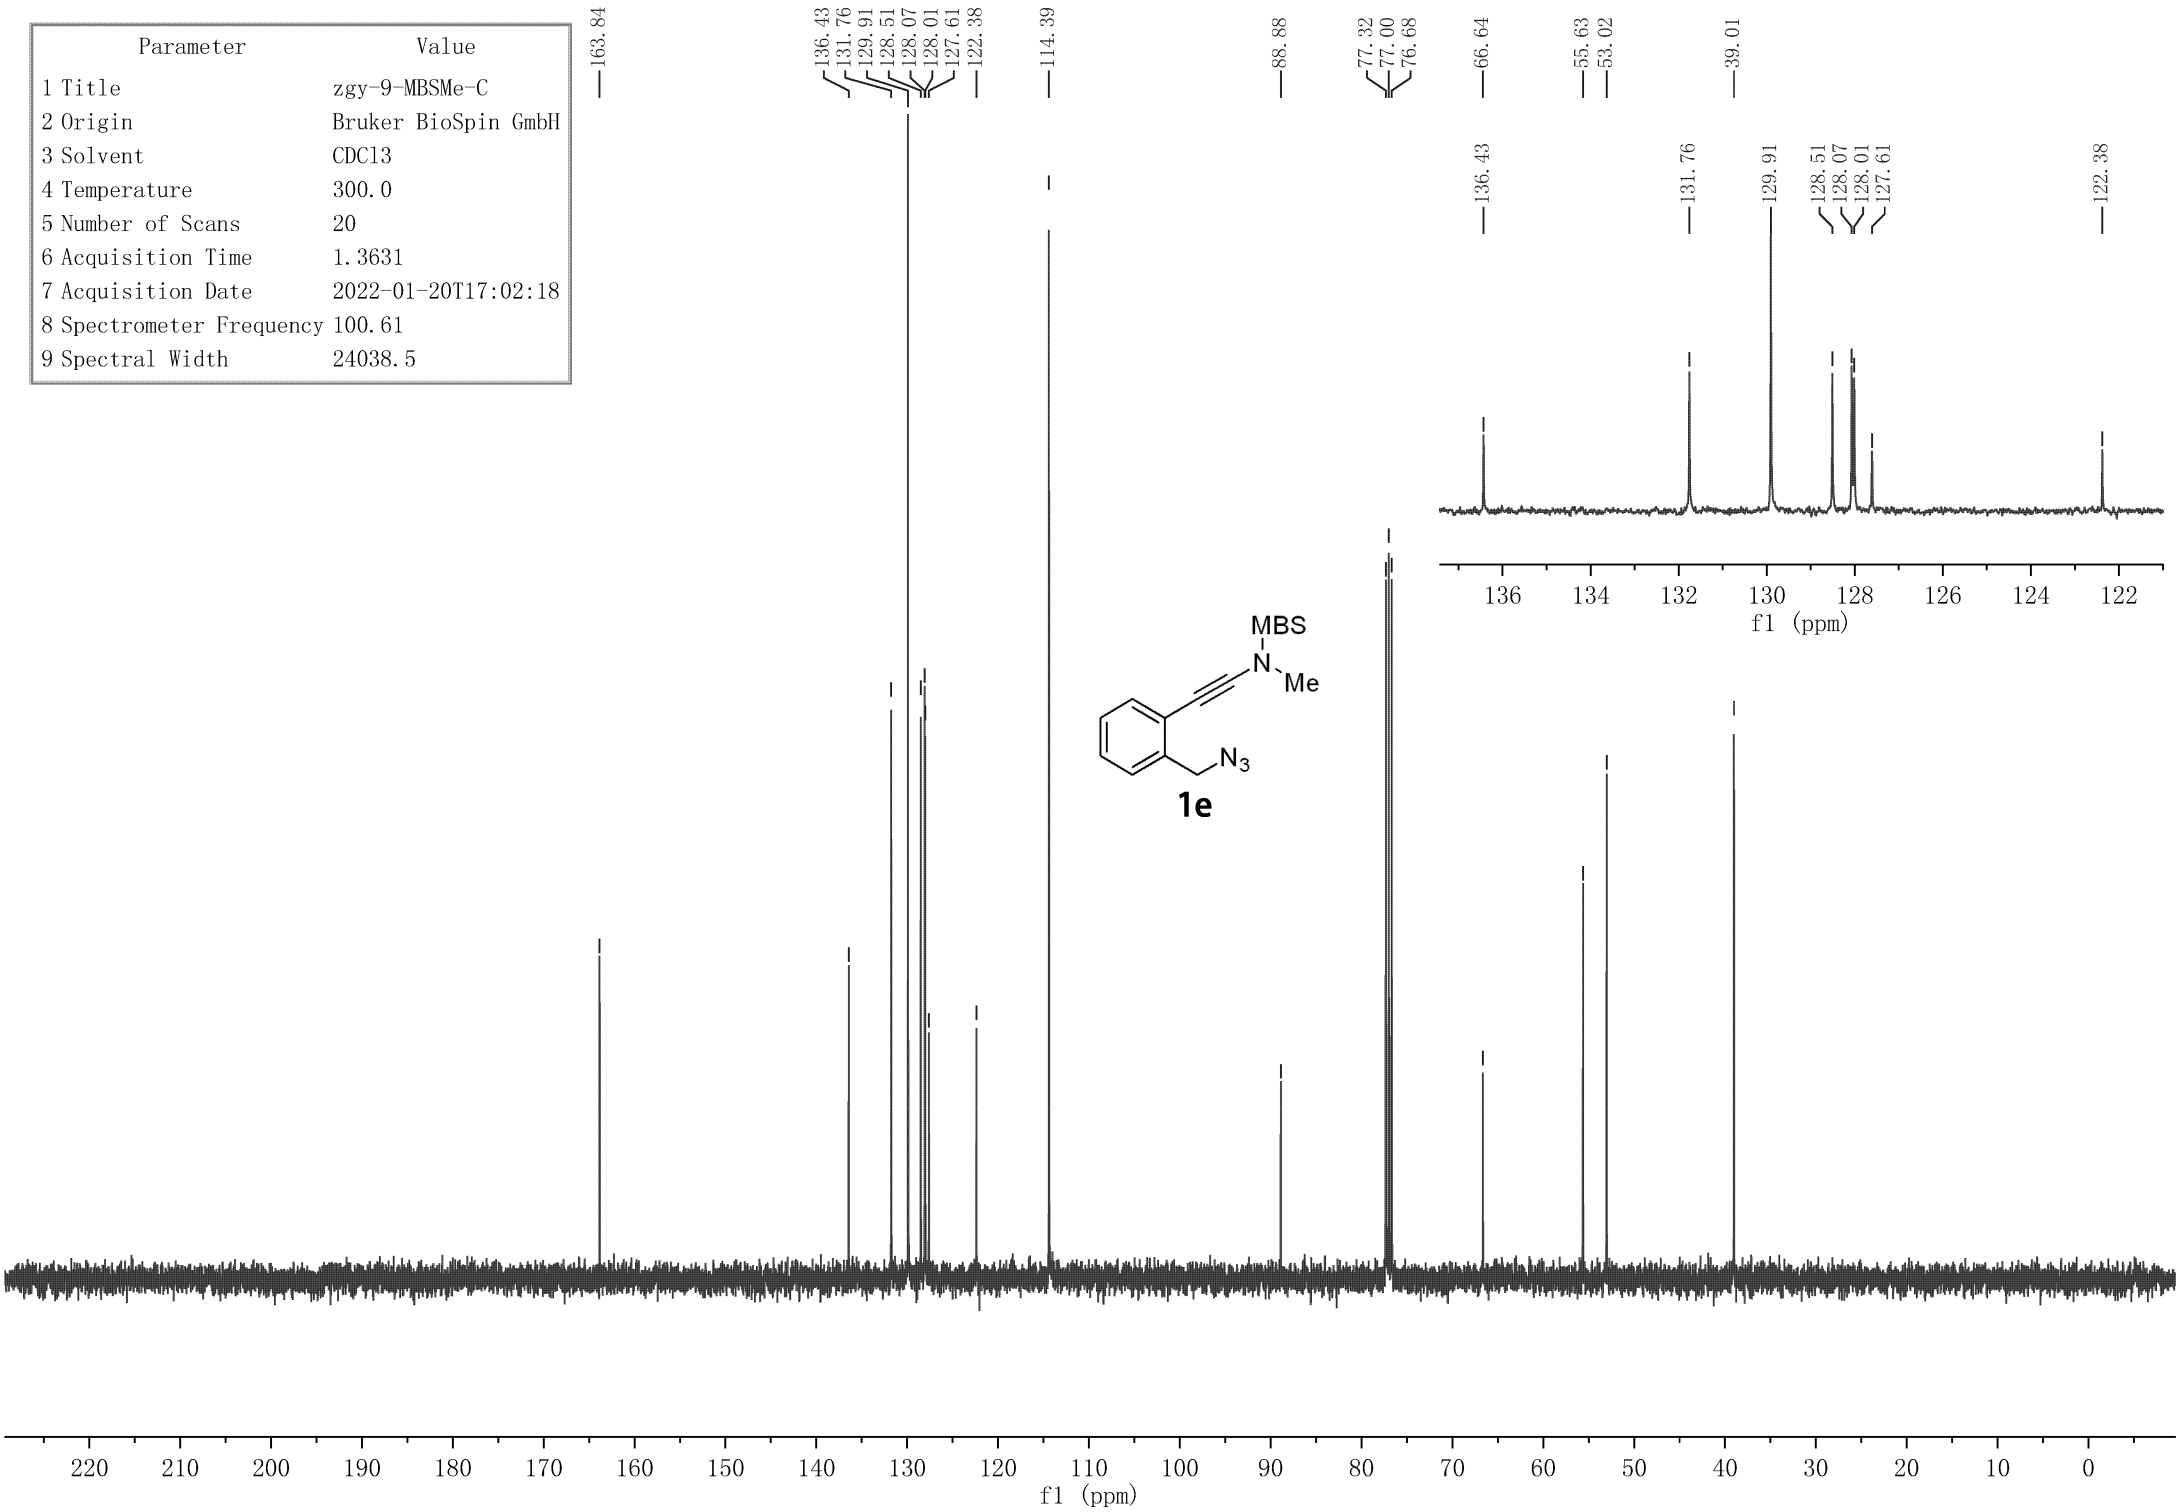

7.911  
7.889  
7.380  
7.329  
7.291  
7.287  
7.280  
7.274  
7.026  
7.004

4.444

3.864

3.410  
3.393  
3.375

1.792  
1.773  
1.755  
1.737  
1.719  
1.701

0.978  
0.959  
0.941

| Parameter                | Value               |
|--------------------------|---------------------|
| 1 Title                  | Mbsn-pr-Sub-1H      |
| 2 Origin                 | Bruker BioSpin GmbH |
| 3 Solvent                | CDC13               |
| 4 Temperature            | 298.0               |
| 5 Number of Scans        | 9                   |
| 6 Acquisition Time       | 4.0894              |
| 7 Acquisition Date       | 2021-10-12T09:38:10 |
| 8 Spectrometer Frequency | 400.13              |
| 9 Spectral Width         | 8012.8              |

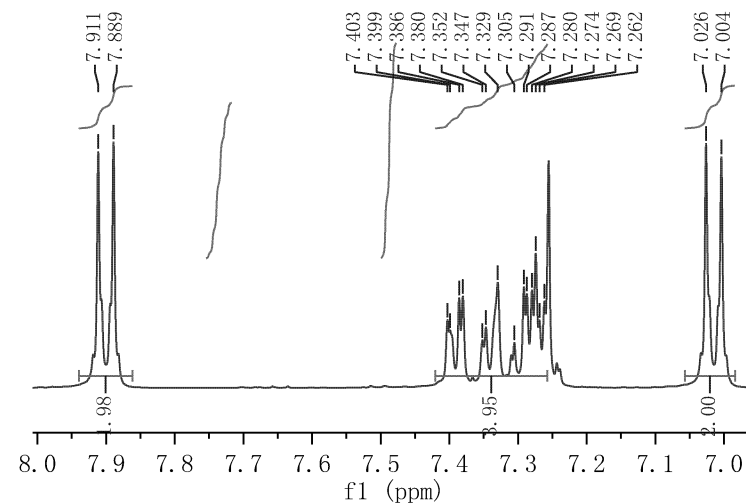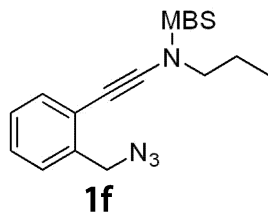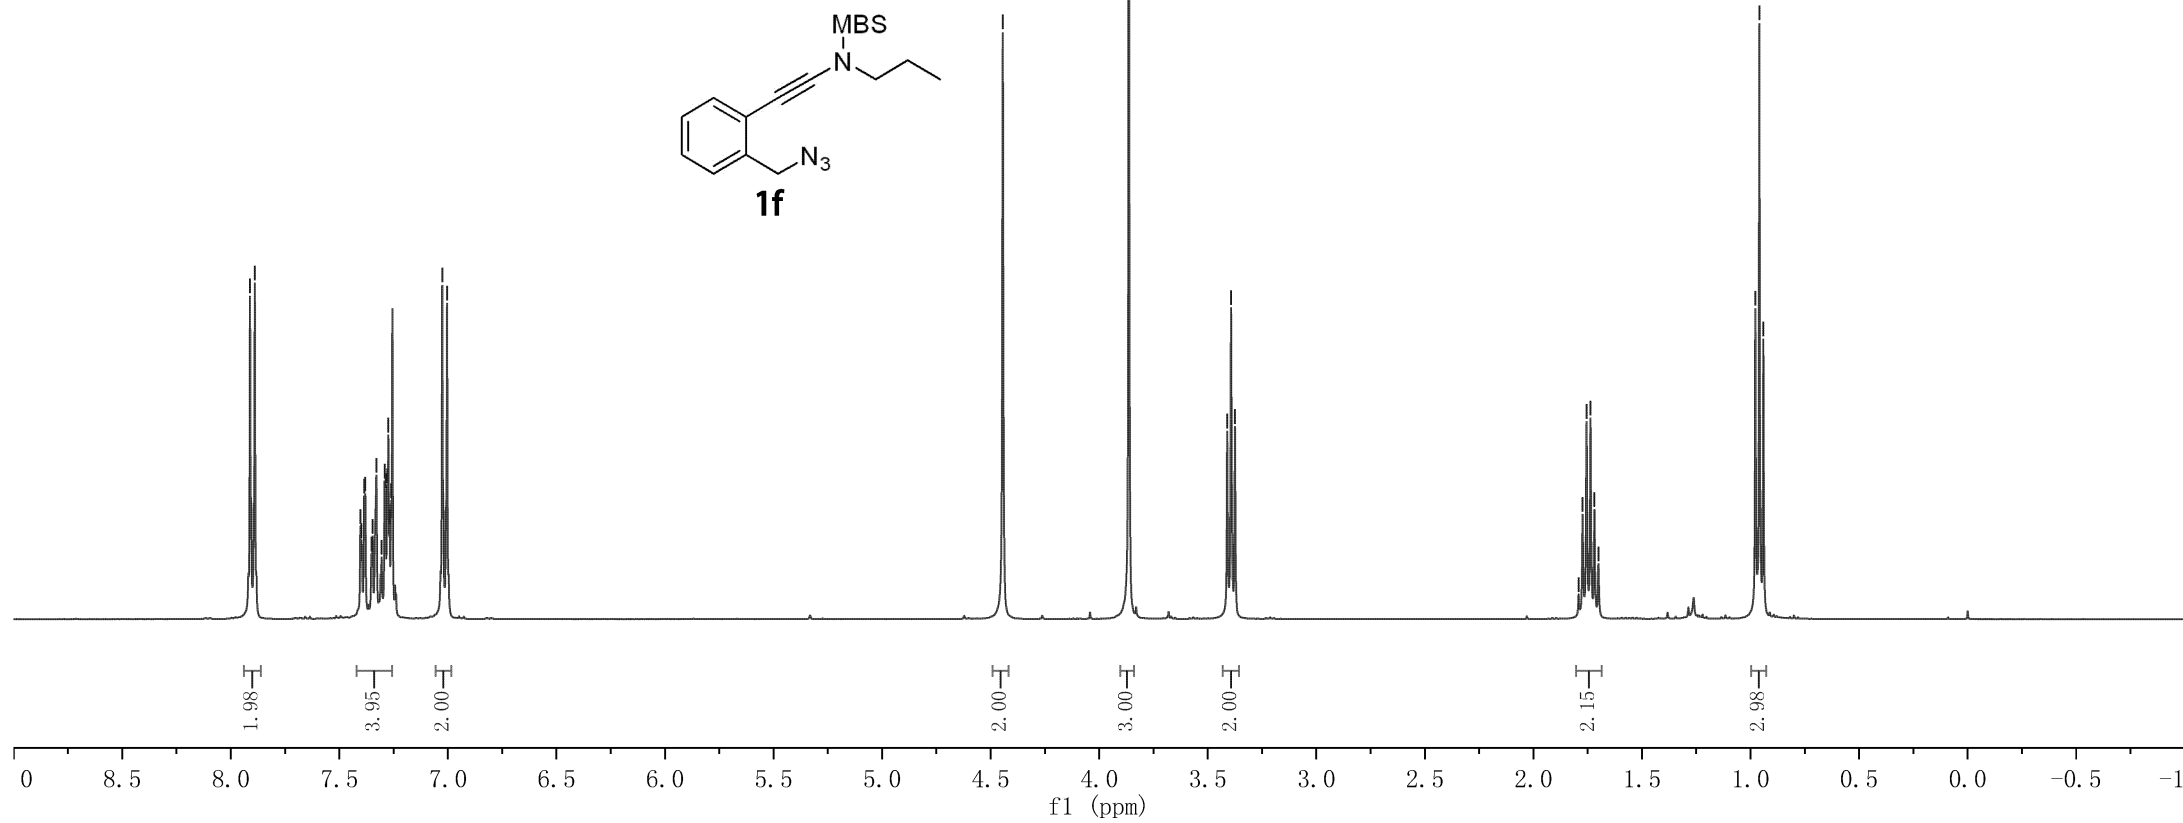

| Parameter                | Value               |
|--------------------------|---------------------|
| 1 Title                  | Mbsn-pr-Sub-C       |
| 2 Origin                 | Bruker BioSpin GmbH |
| 3 Solvent                | CDC13               |
| 4 Temperature            | 300.0               |
| 5 Number of Scans        | 11                  |
| 6 Acquisition Time       | 1.3631              |
| 7 Acquisition Date       | 2021-10-12T09:39:37 |
| 8 Spectrometer Frequency | 100.61              |
| 9 Spectral Width         | 24038.5             |

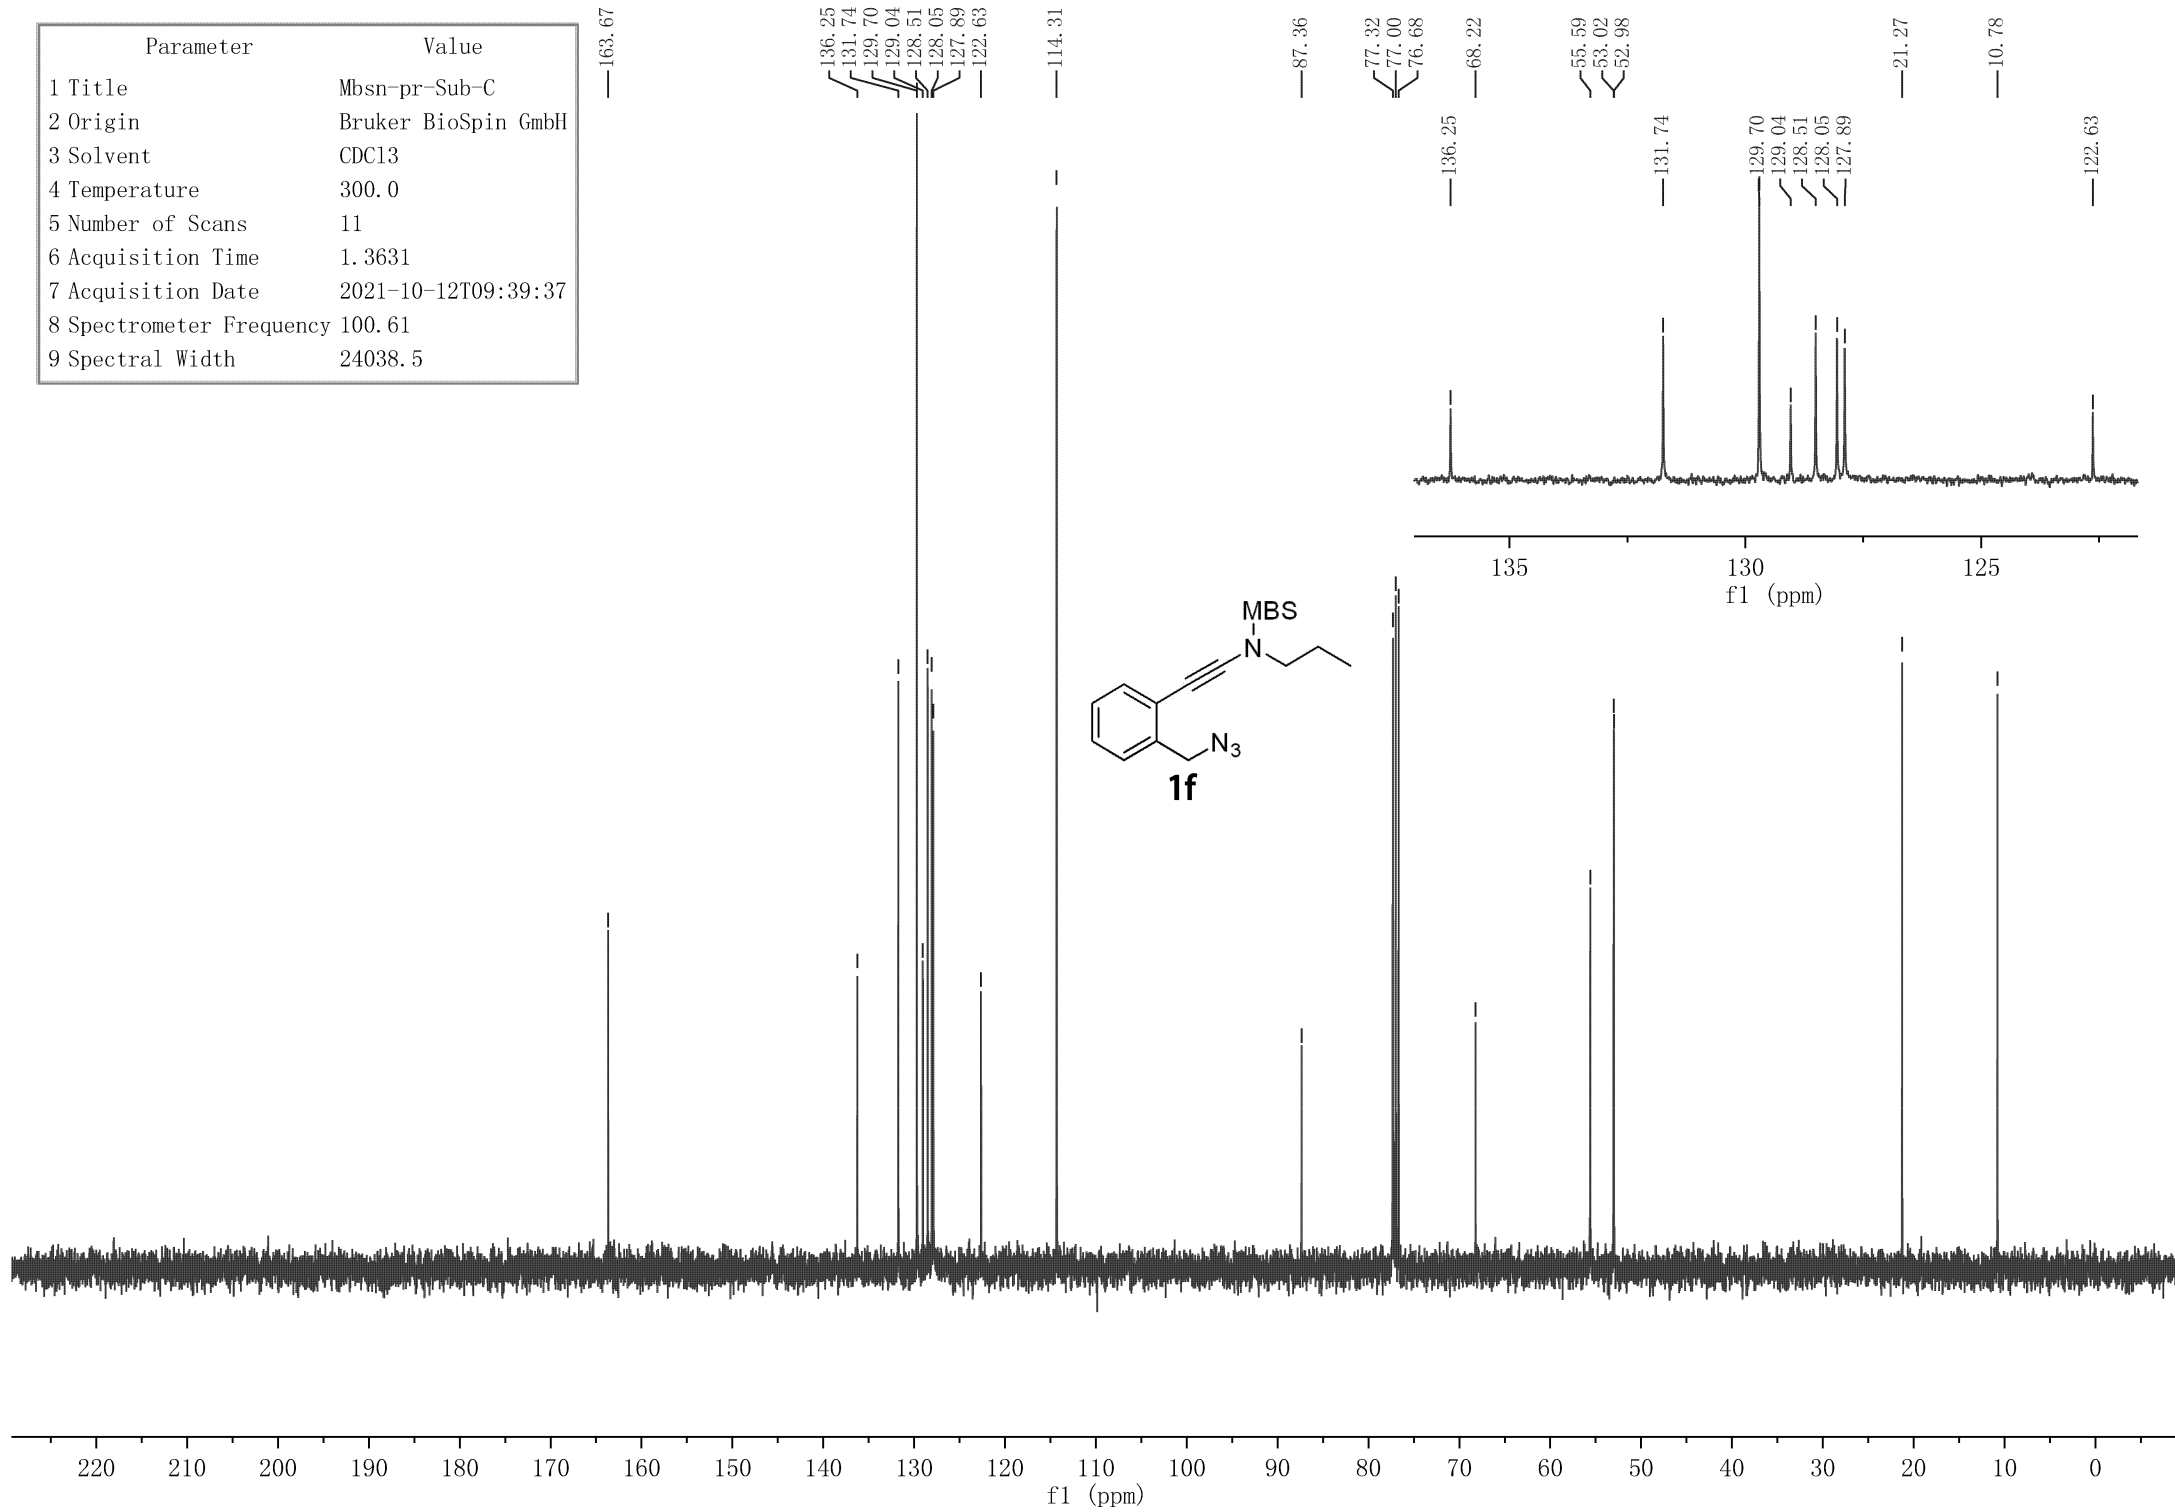

| Parameter                | Value               |
|--------------------------|---------------------|
| 1 Title                  | wcy-3-63-H          |
| 2 Origin                 | Bruker BioSpin GmbH |
| 3 Solvent                | CDC13               |
| 4 Temperature            | 298.0               |
| 5 Number of Scans        | 4                   |
| 6 Acquisition Time       | 4.0894              |
| 7 Acquisition Date       | 2021-11-17T18:58:58 |
| 8 Spectrometer Frequency | 400.13              |
| 9 Spectral Width         | 8012.8              |

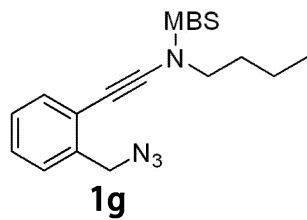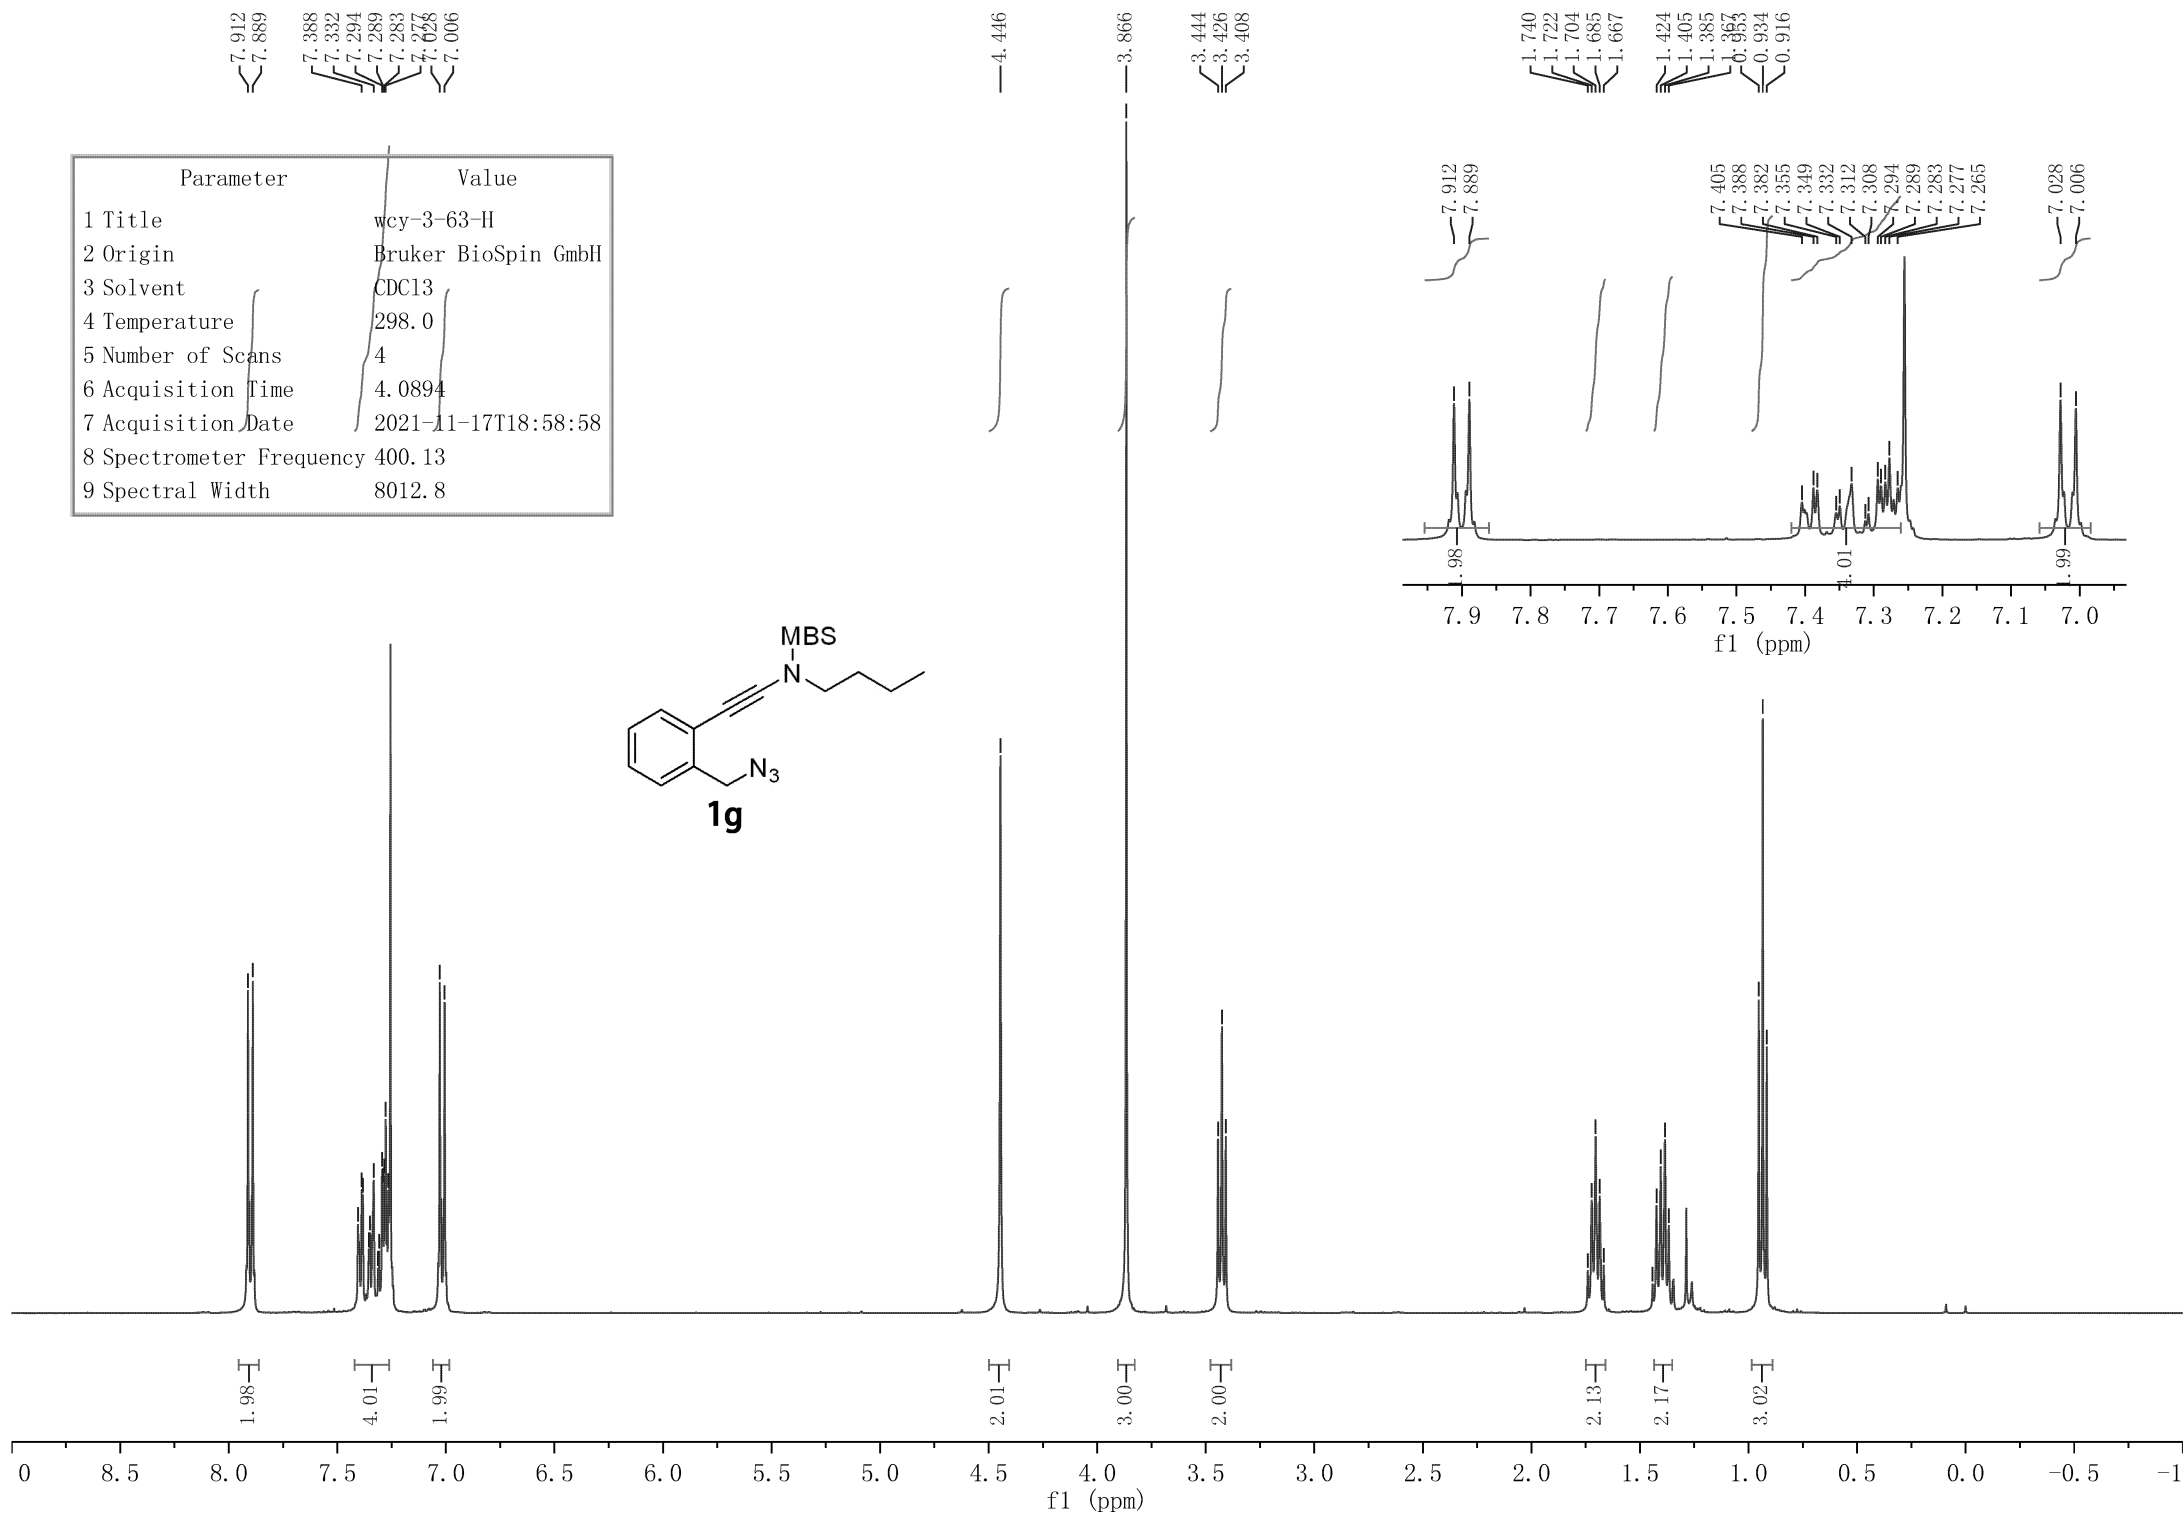

| Parameter                | Value               |
|--------------------------|---------------------|
| 1 Title                  | wcy-3-63-C          |
| 2 Origin                 | Bruker BioSpin GmbH |
| 3 Solvent                | CDC13               |
| 4 Temperature            | 300.0               |
| 5 Number of Scans        | 5                   |
| 6 Acquisition Time       | 1.3631              |
| 7 Acquisition Date       | 2021-11-17T18:59:56 |
| 8 Spectrometer Frequency | 100.61              |
| 9 Spectral Width         | 24038.5             |

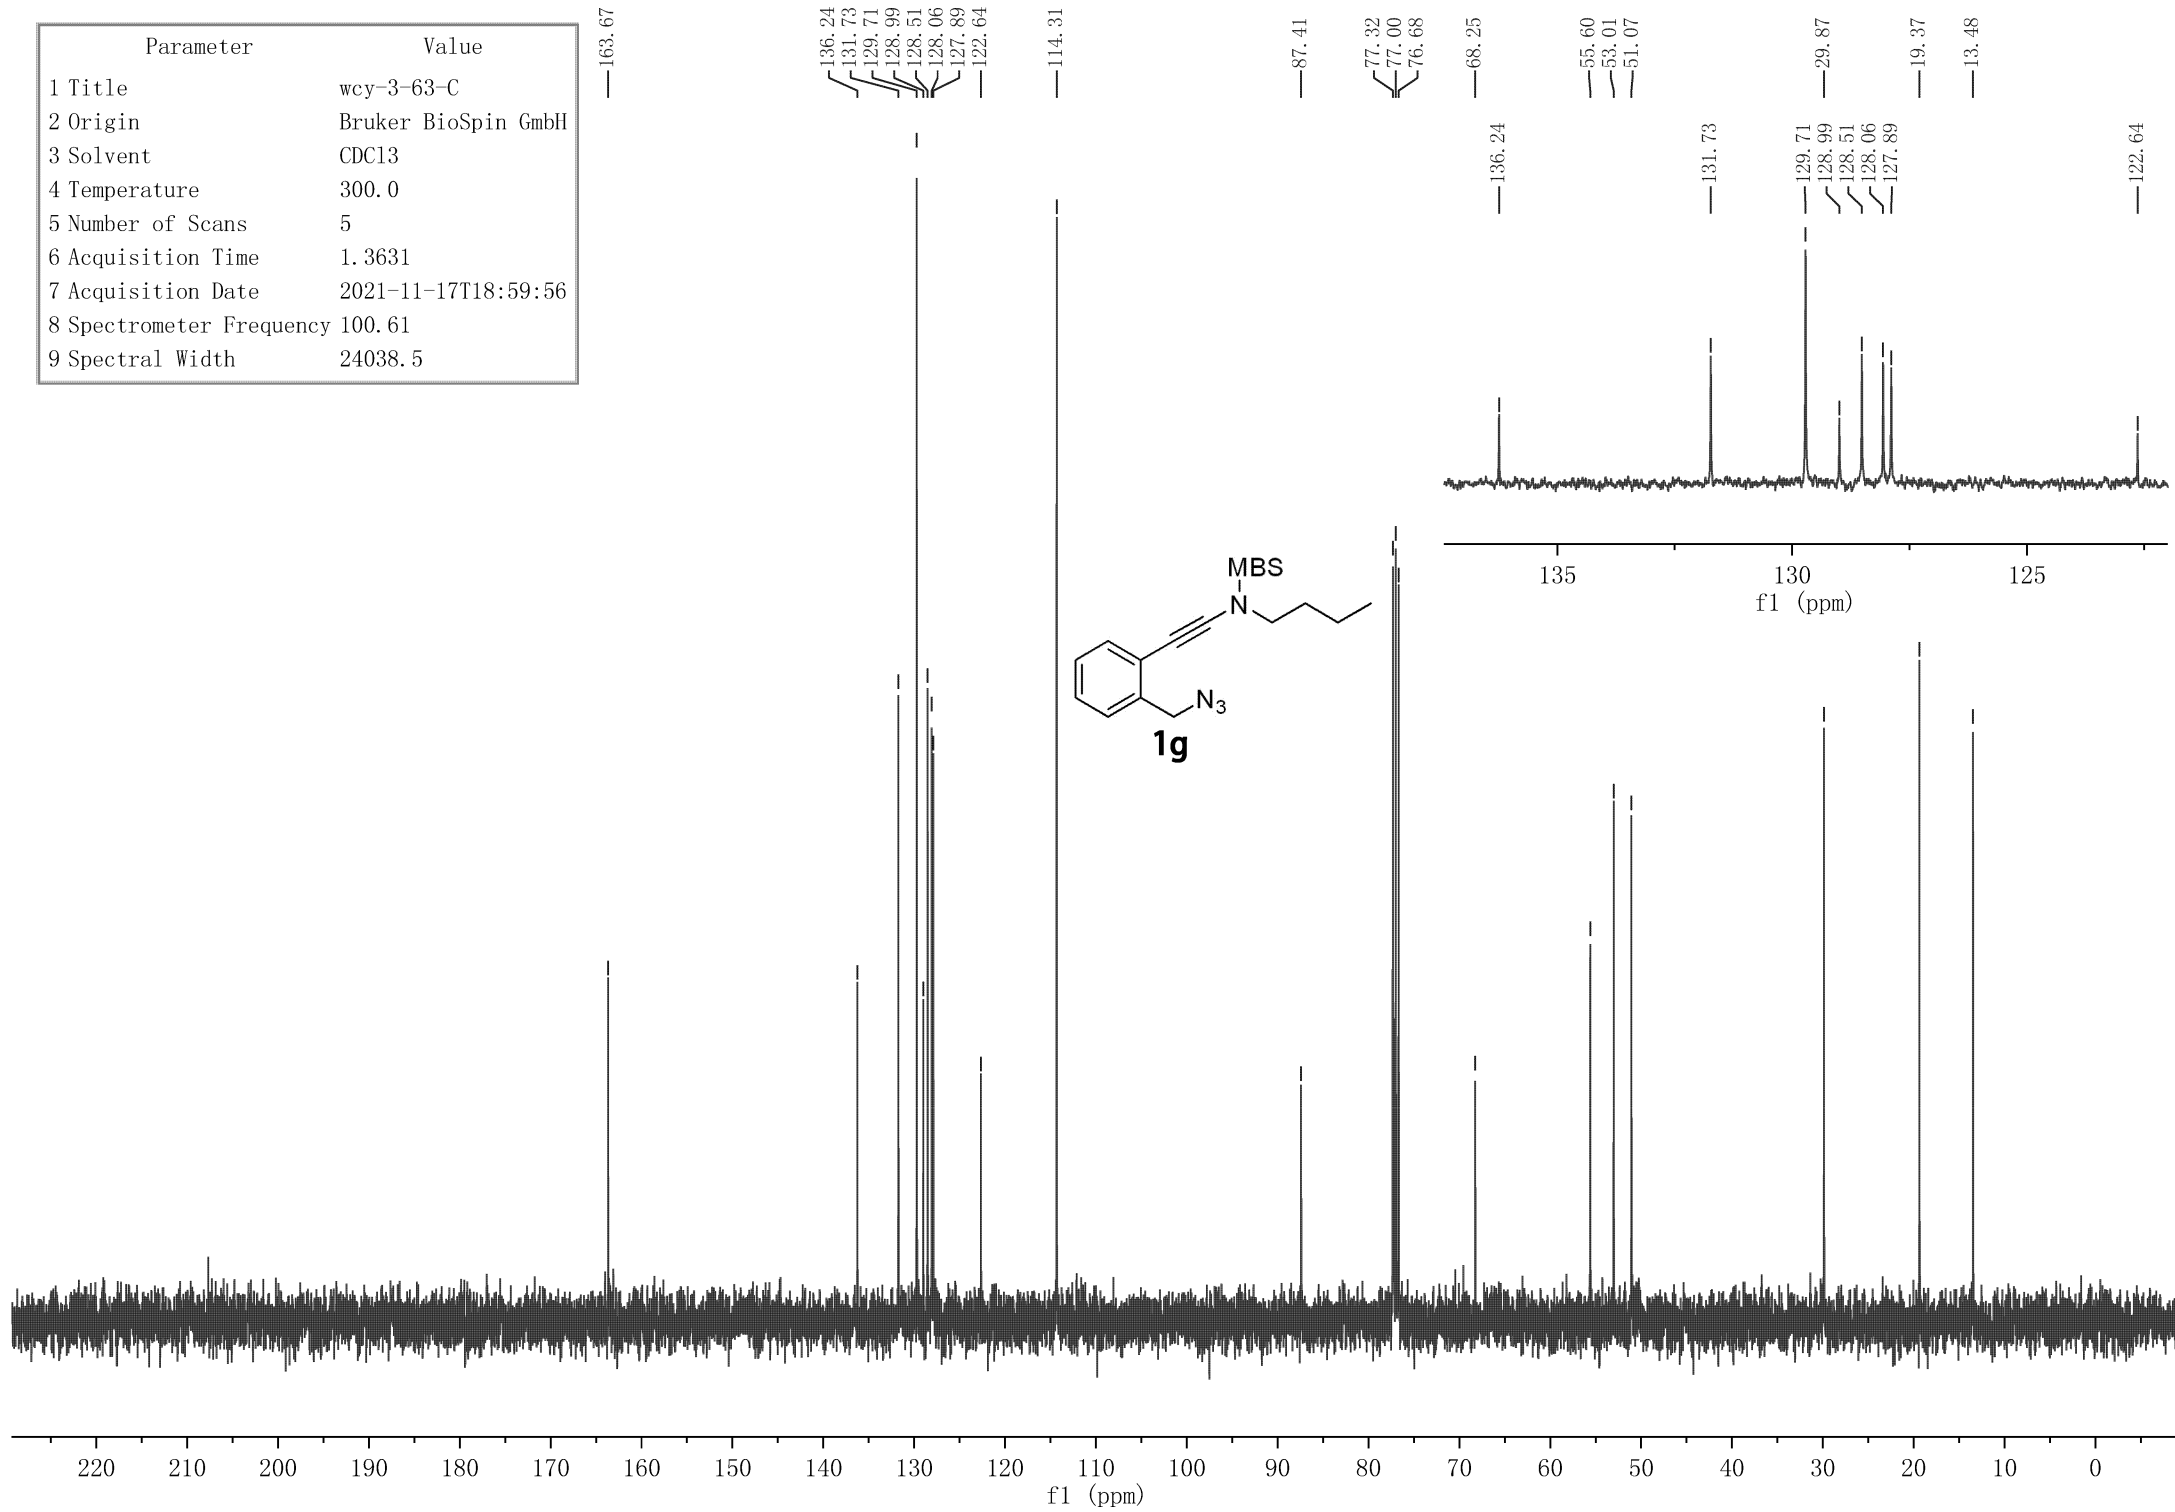

7.919  
7.897  
7.415  
7.405  
7.336  
7.324  
7.277  
7.265  
7.005  
6.983

4.453

3.882  
3.872  
3.862  
3.839  
3.814

1.791  
1.753  
1.718  
1.613  
1.601  
1.578  
1.548  
1.539  
1.517  
1.508  
1.355  
1.324  
1.292  
1.284  
1.261  
1.123  
1.091  
1.058  
1.026

| Parameter                | Value               |
|--------------------------|---------------------|
| 1 Title                  | MbsCy-Sub-1H        |
| 2 Origin                 | Bruker BioSpin GmbH |
| 3 Solvent                | CDC13               |
| 4 Temperature            | 298.0               |
| 5 Number of Scans        | 4                   |
| 6 Acquisition Time       | 4.0894              |
| 7 Acquisition Date       | 2021-11-04T19:34:31 |
| 8 Spectrometer Frequency | 400.13              |
| 9 Spectral Width         | 8012.8              |

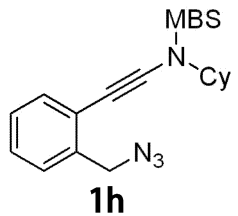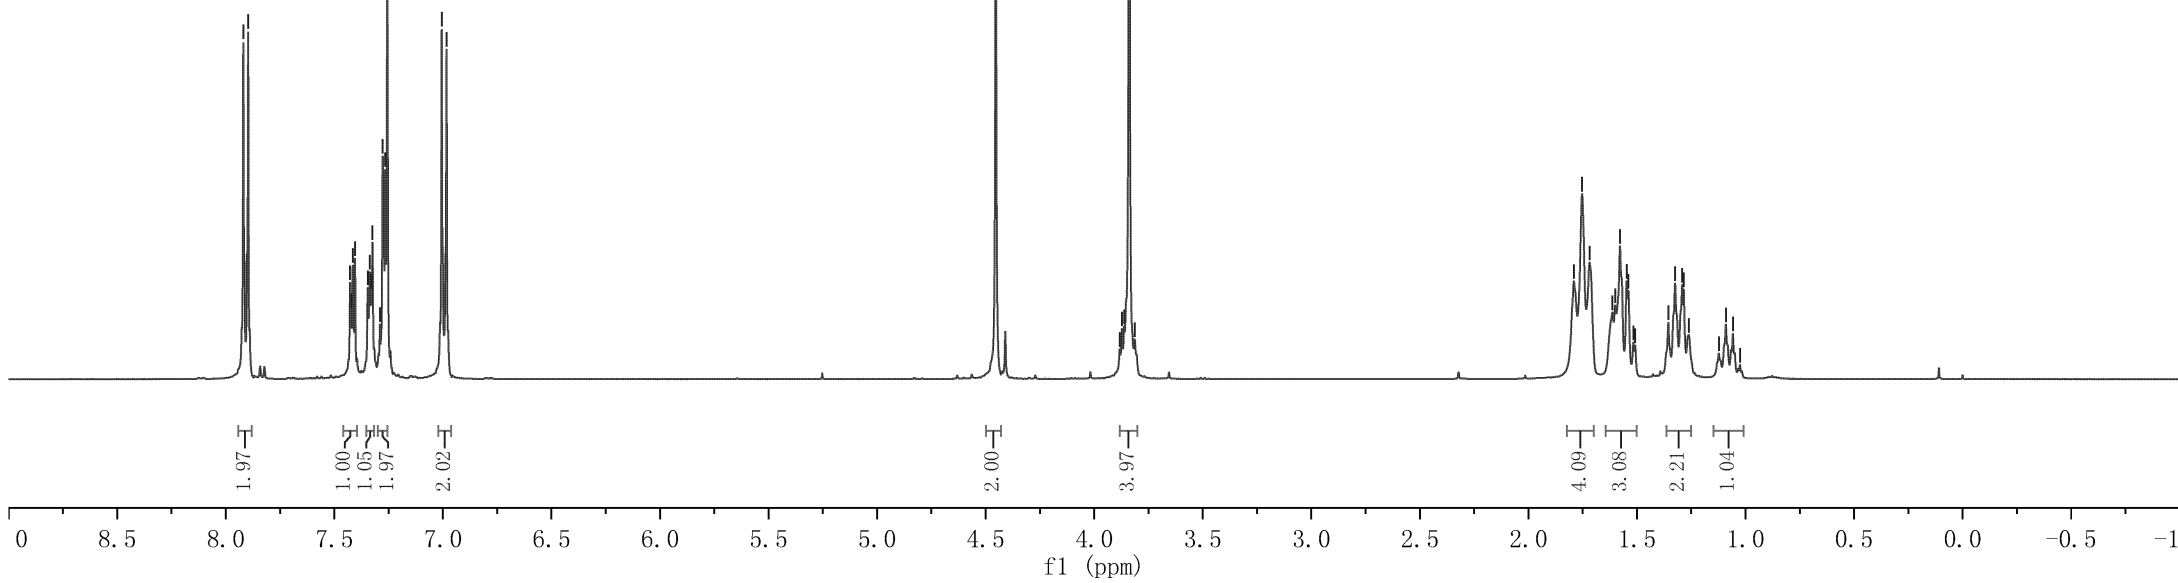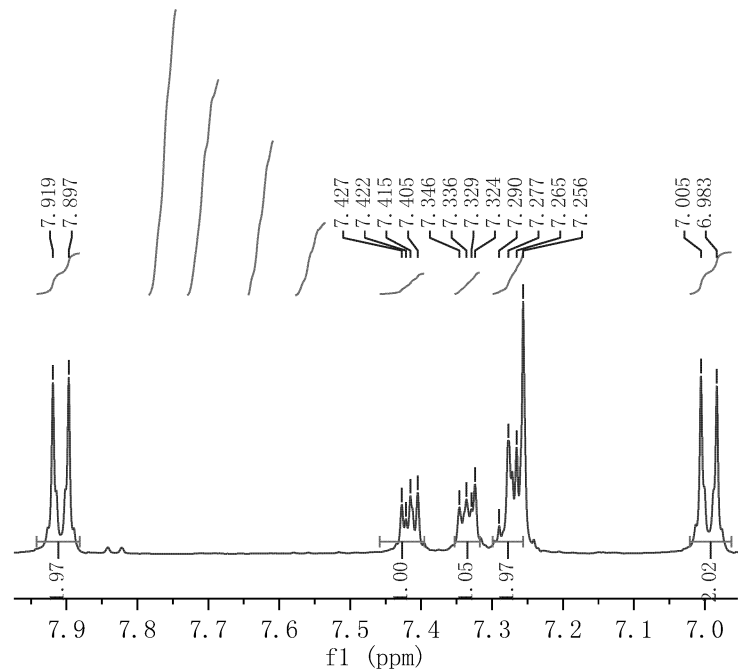



| Parameter                | Value               |
|--------------------------|---------------------|
| 1 Title                  | MbsCy-Sub-C         |
| 2 Origin                 | Bruker BioSpin GmbH |
| 3 Solvent                | CDC13               |
| 4 Temperature            | 300.0               |
| 5 Number of Scans        | 6                   |
| 6 Acquisition Time       | 1.3631              |
| 7 Acquisition Date       | 2021-11-04T19:35:25 |
| 8 Spectrometer Frequency | 100.61              |
| 9 Spectral Width         | 24038.5             |

163.42

135.90  
131.55  
130.36  
129.33  
128.47  
127.96  
127.61  
122.84

114.18

85.25

77.32  
77.00  
76.68

69.87

59.36  
55.45  
52.92

31.10

25.22  
24.70

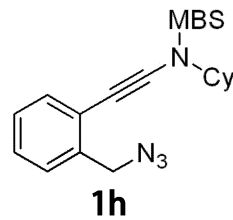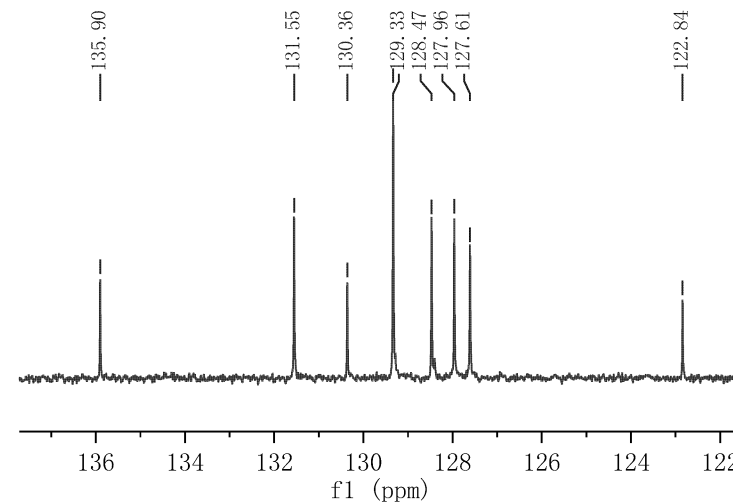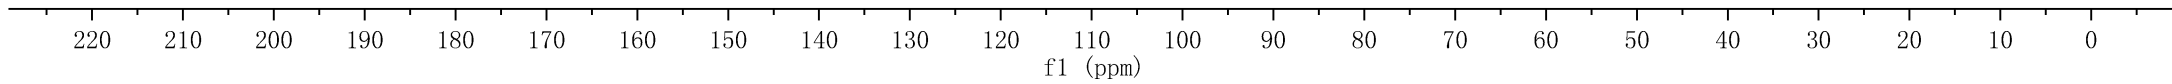

7.883  
7.861  
7.327  
7.264  
7.259  
7.256  
7.249  
7.236  
7.218  
7.213  
7.208  
7.199  
7.190  
7.000  
6.978

4.595  
4.134  
3.858

| Parameter                | Value               |
|--------------------------|---------------------|
| 1 Title                  | Mb8Bn-Sub-1H        |
| 2 Origin                 | Bruker BioSpin GmbH |
| 3 Solvent                | CDCl3               |
| 4 Temperature            | 298.0               |
| 5 Number of Scans        | 9                   |
| 6 Acquisition Time       | 4.0894              |
| 7 Acquisition Date       | 2021-09-20T22:44:10 |
| 8 Spectrometer Frequency | 400.13              |
| 9 Spectral Width         | 8012.8              |

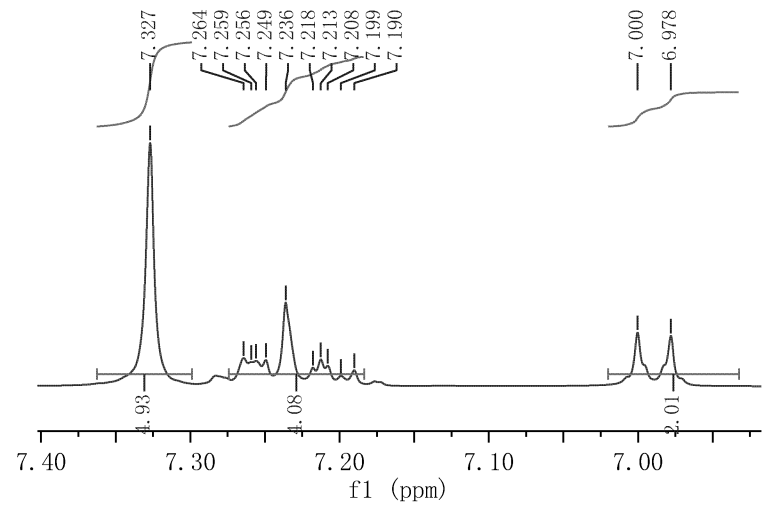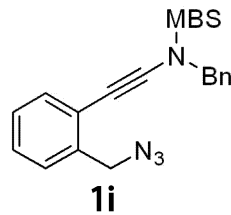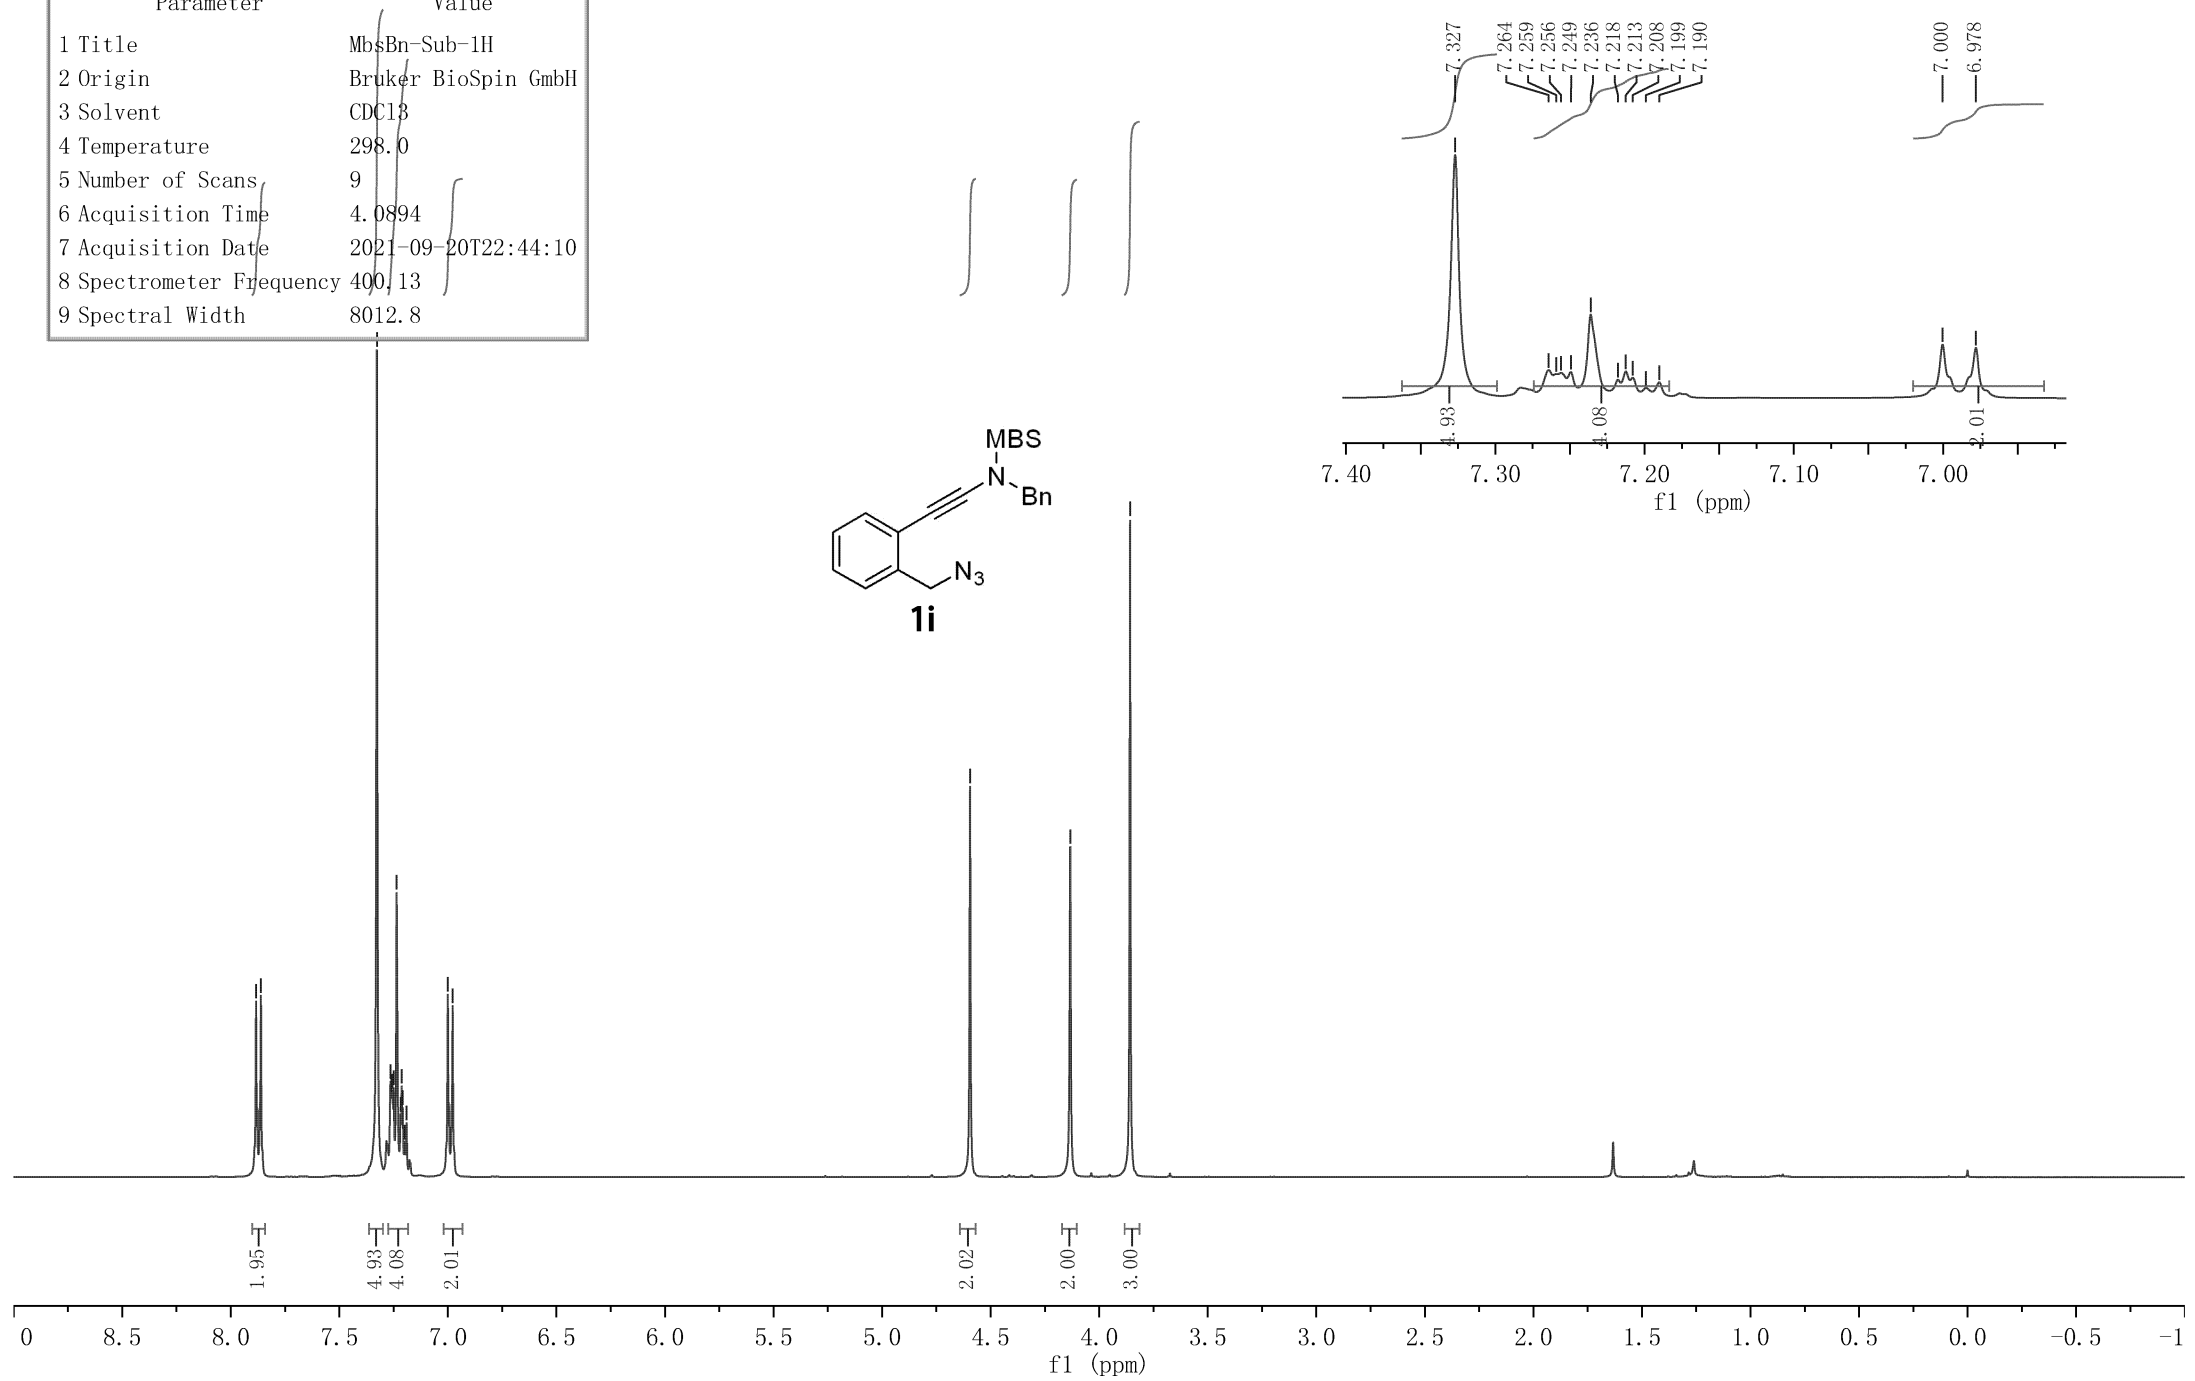

| Parameter                | Value               |
|--------------------------|---------------------|
| 1 Title                  | MbsBn-Sub-C         |
| 2 Origin                 | Bruker BioSpin GmbH |
| 3 Solvent                | CDC13               |
| 4 Temperature            | 300.0               |
| 5 Number of Scans        | 10                  |
| 6 Acquisition Time       | 1.3631              |
| 7 Acquisition Date       | 2021-09-20T22:45:23 |
| 8 Spectrometer Frequency | 100.61              |
| 9 Spectral Width         | 24038.5             |

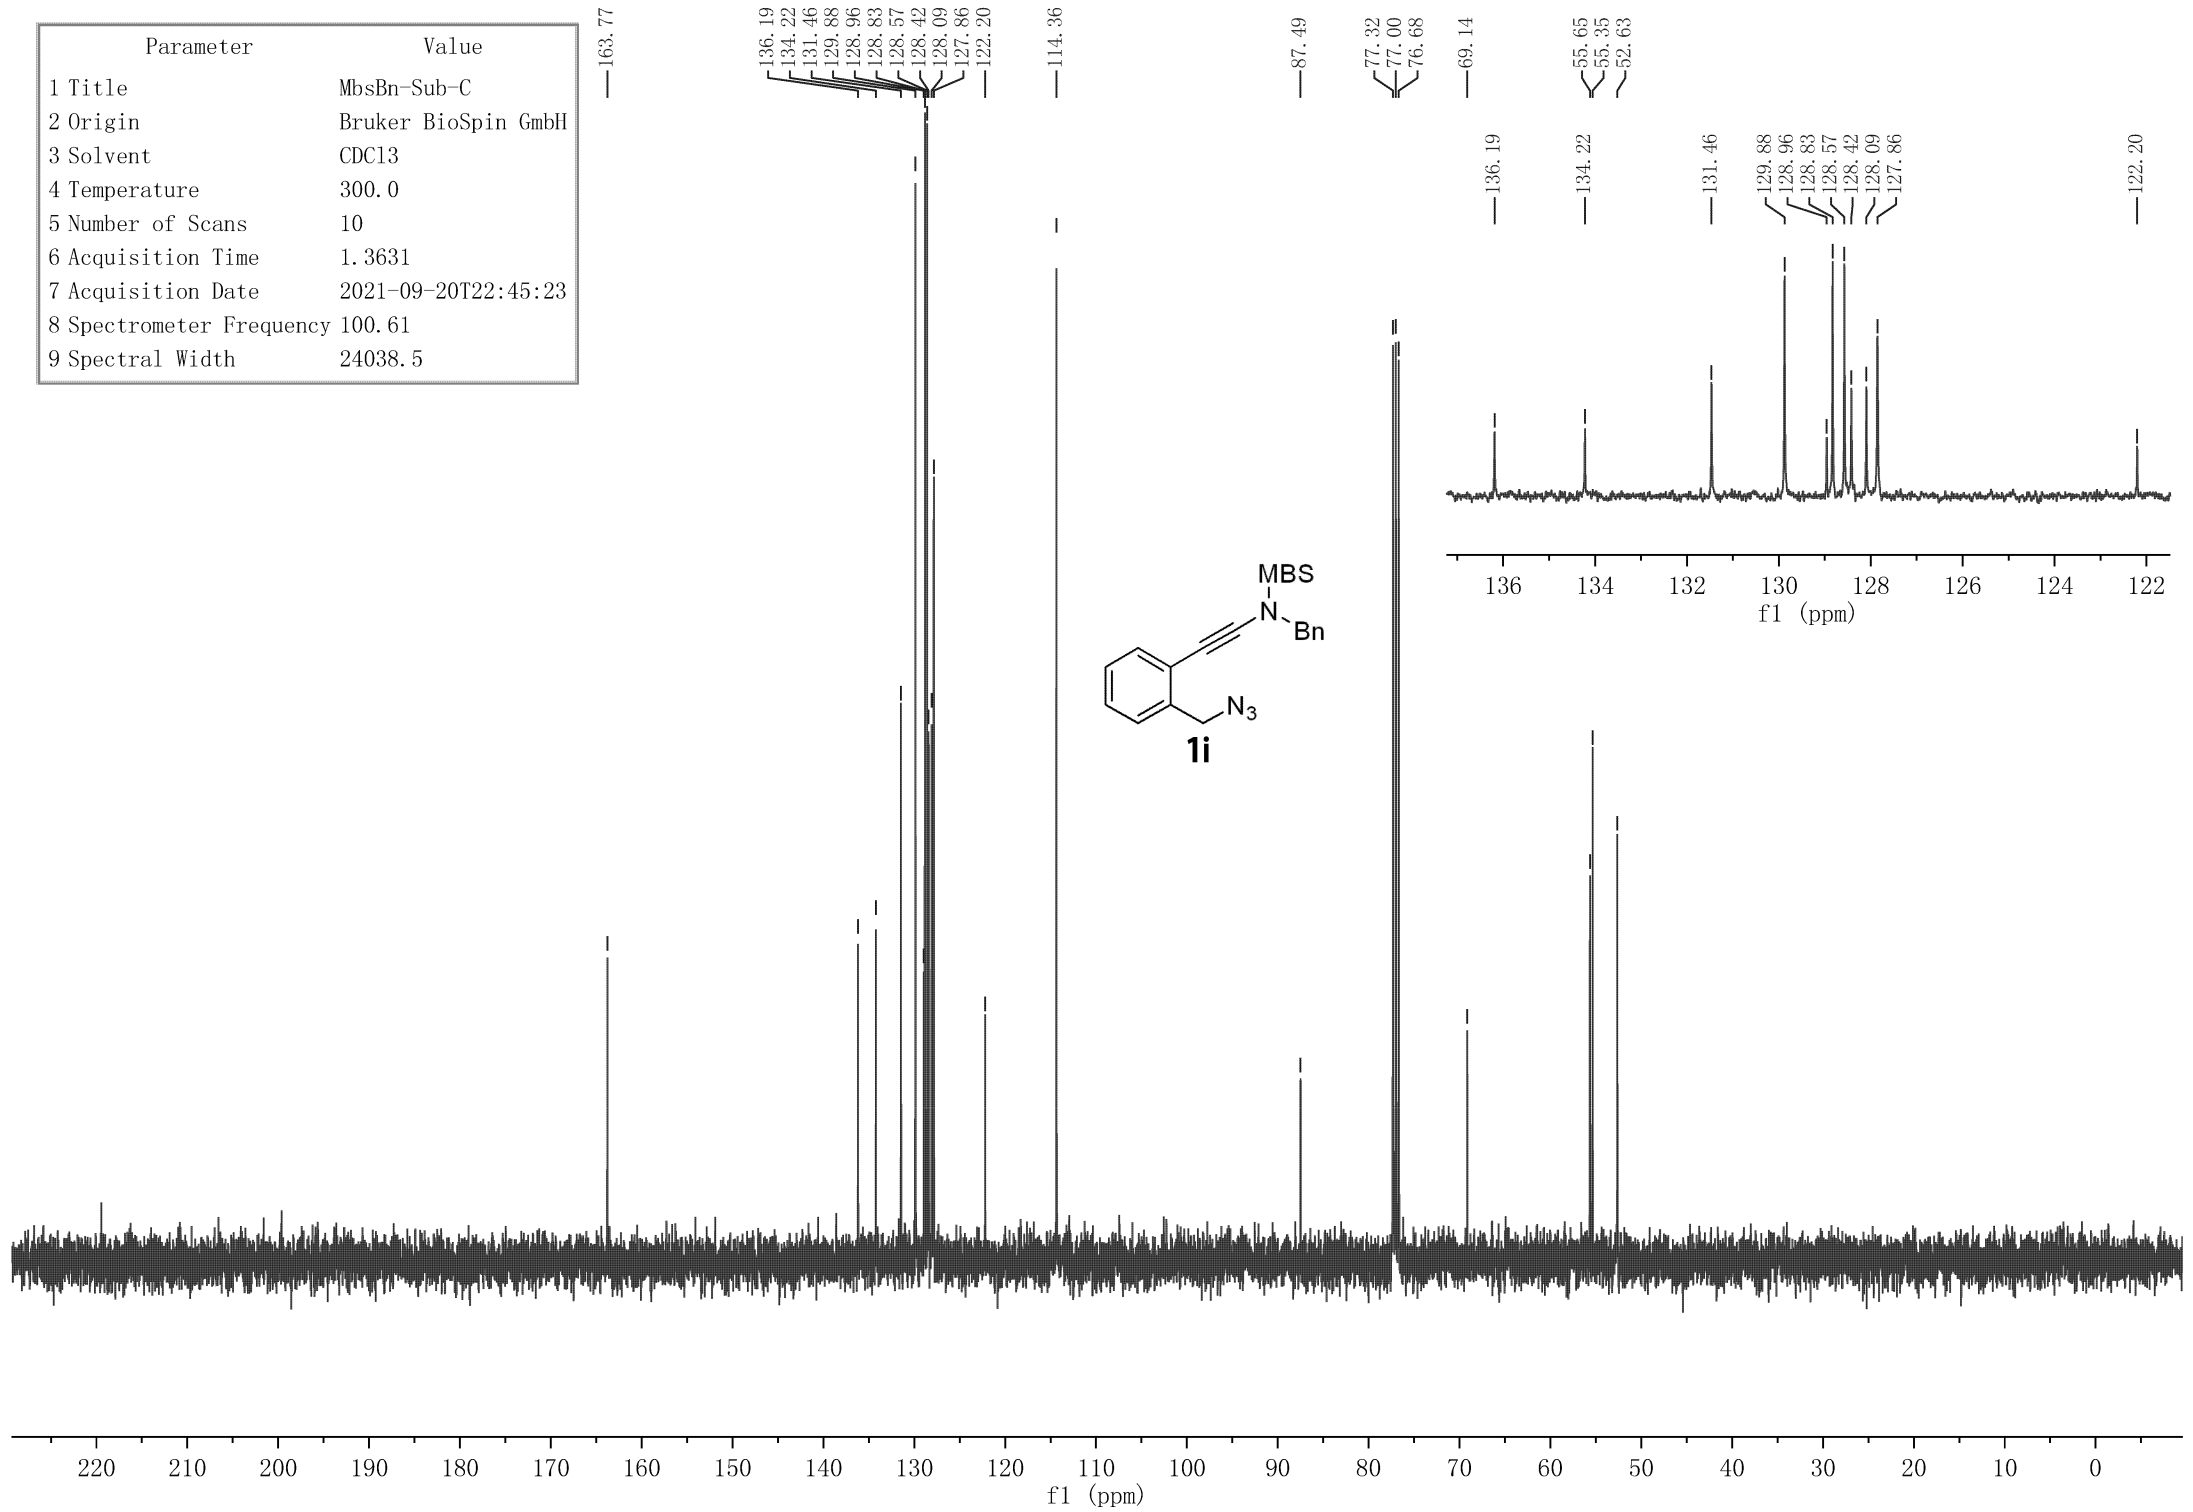

7.551  
7.528  
7.220  
7.215  
7.209  
7.195  
7.187  
6.774

4.329

3.674

| Parameter                | Value               |
|--------------------------|---------------------|
| 1 Title                  | MbsPh-Sub-1H        |
| 2 Origin                 | Bruker BioSpin GmbH |
| 3 Solvent                | CDCl3               |
| 4 Temperature            | 298.0               |
| 5 Number of Scans        | 5                   |
| 6 Acquisition Time       | 4.0894              |
| 7 Acquisition Date       | 2021-10-16 16:56:50 |
| 8 Spectrometer Frequency | 400.13              |
| 9 Spectral Width         | 8012.8              |

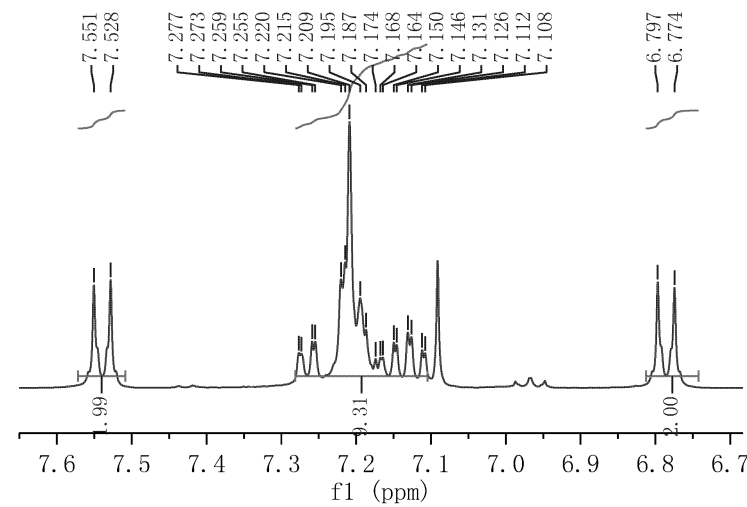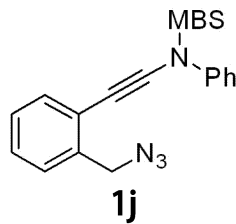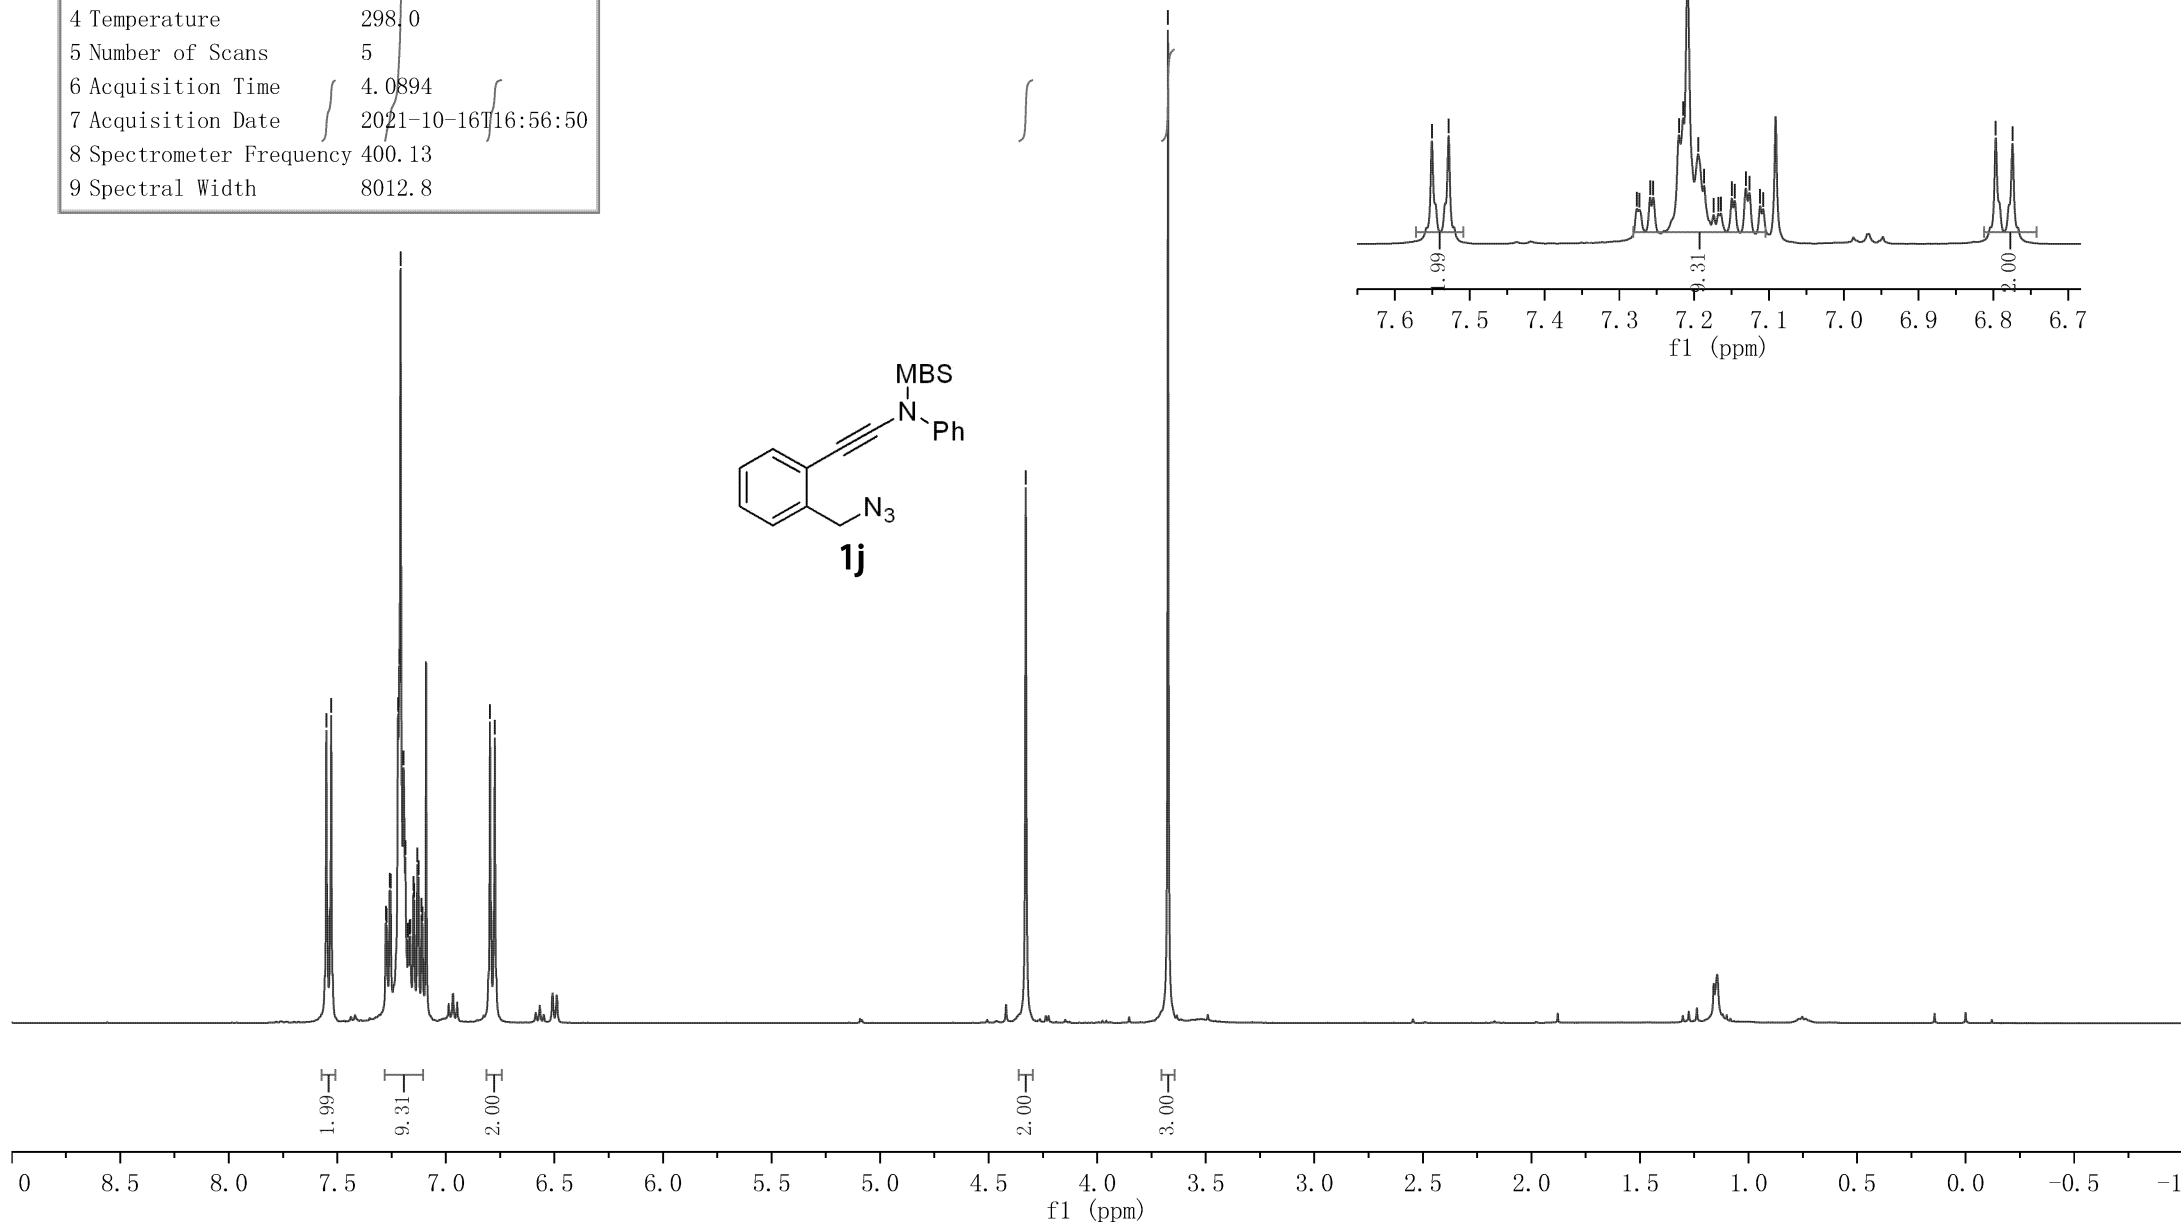

| Parameter                | Value               |
|--------------------------|---------------------|
| 1 Title                  | MbsPh-Sub-C         |
| 2 Origin                 | Bruker BioSpin GmbH |
| 3 Solvent                | CDCl3               |
| 4 Temperature            | 300.0               |
| 5 Number of Scans        | 4                   |
| 6 Acquisition Time       | 1.3631              |
| 7 Acquisition Date       | 2021-10-09T08:12:46 |
| 8 Spectrometer Frequency | 100.61              |
| 9 Spectral Width         | 24038.5             |

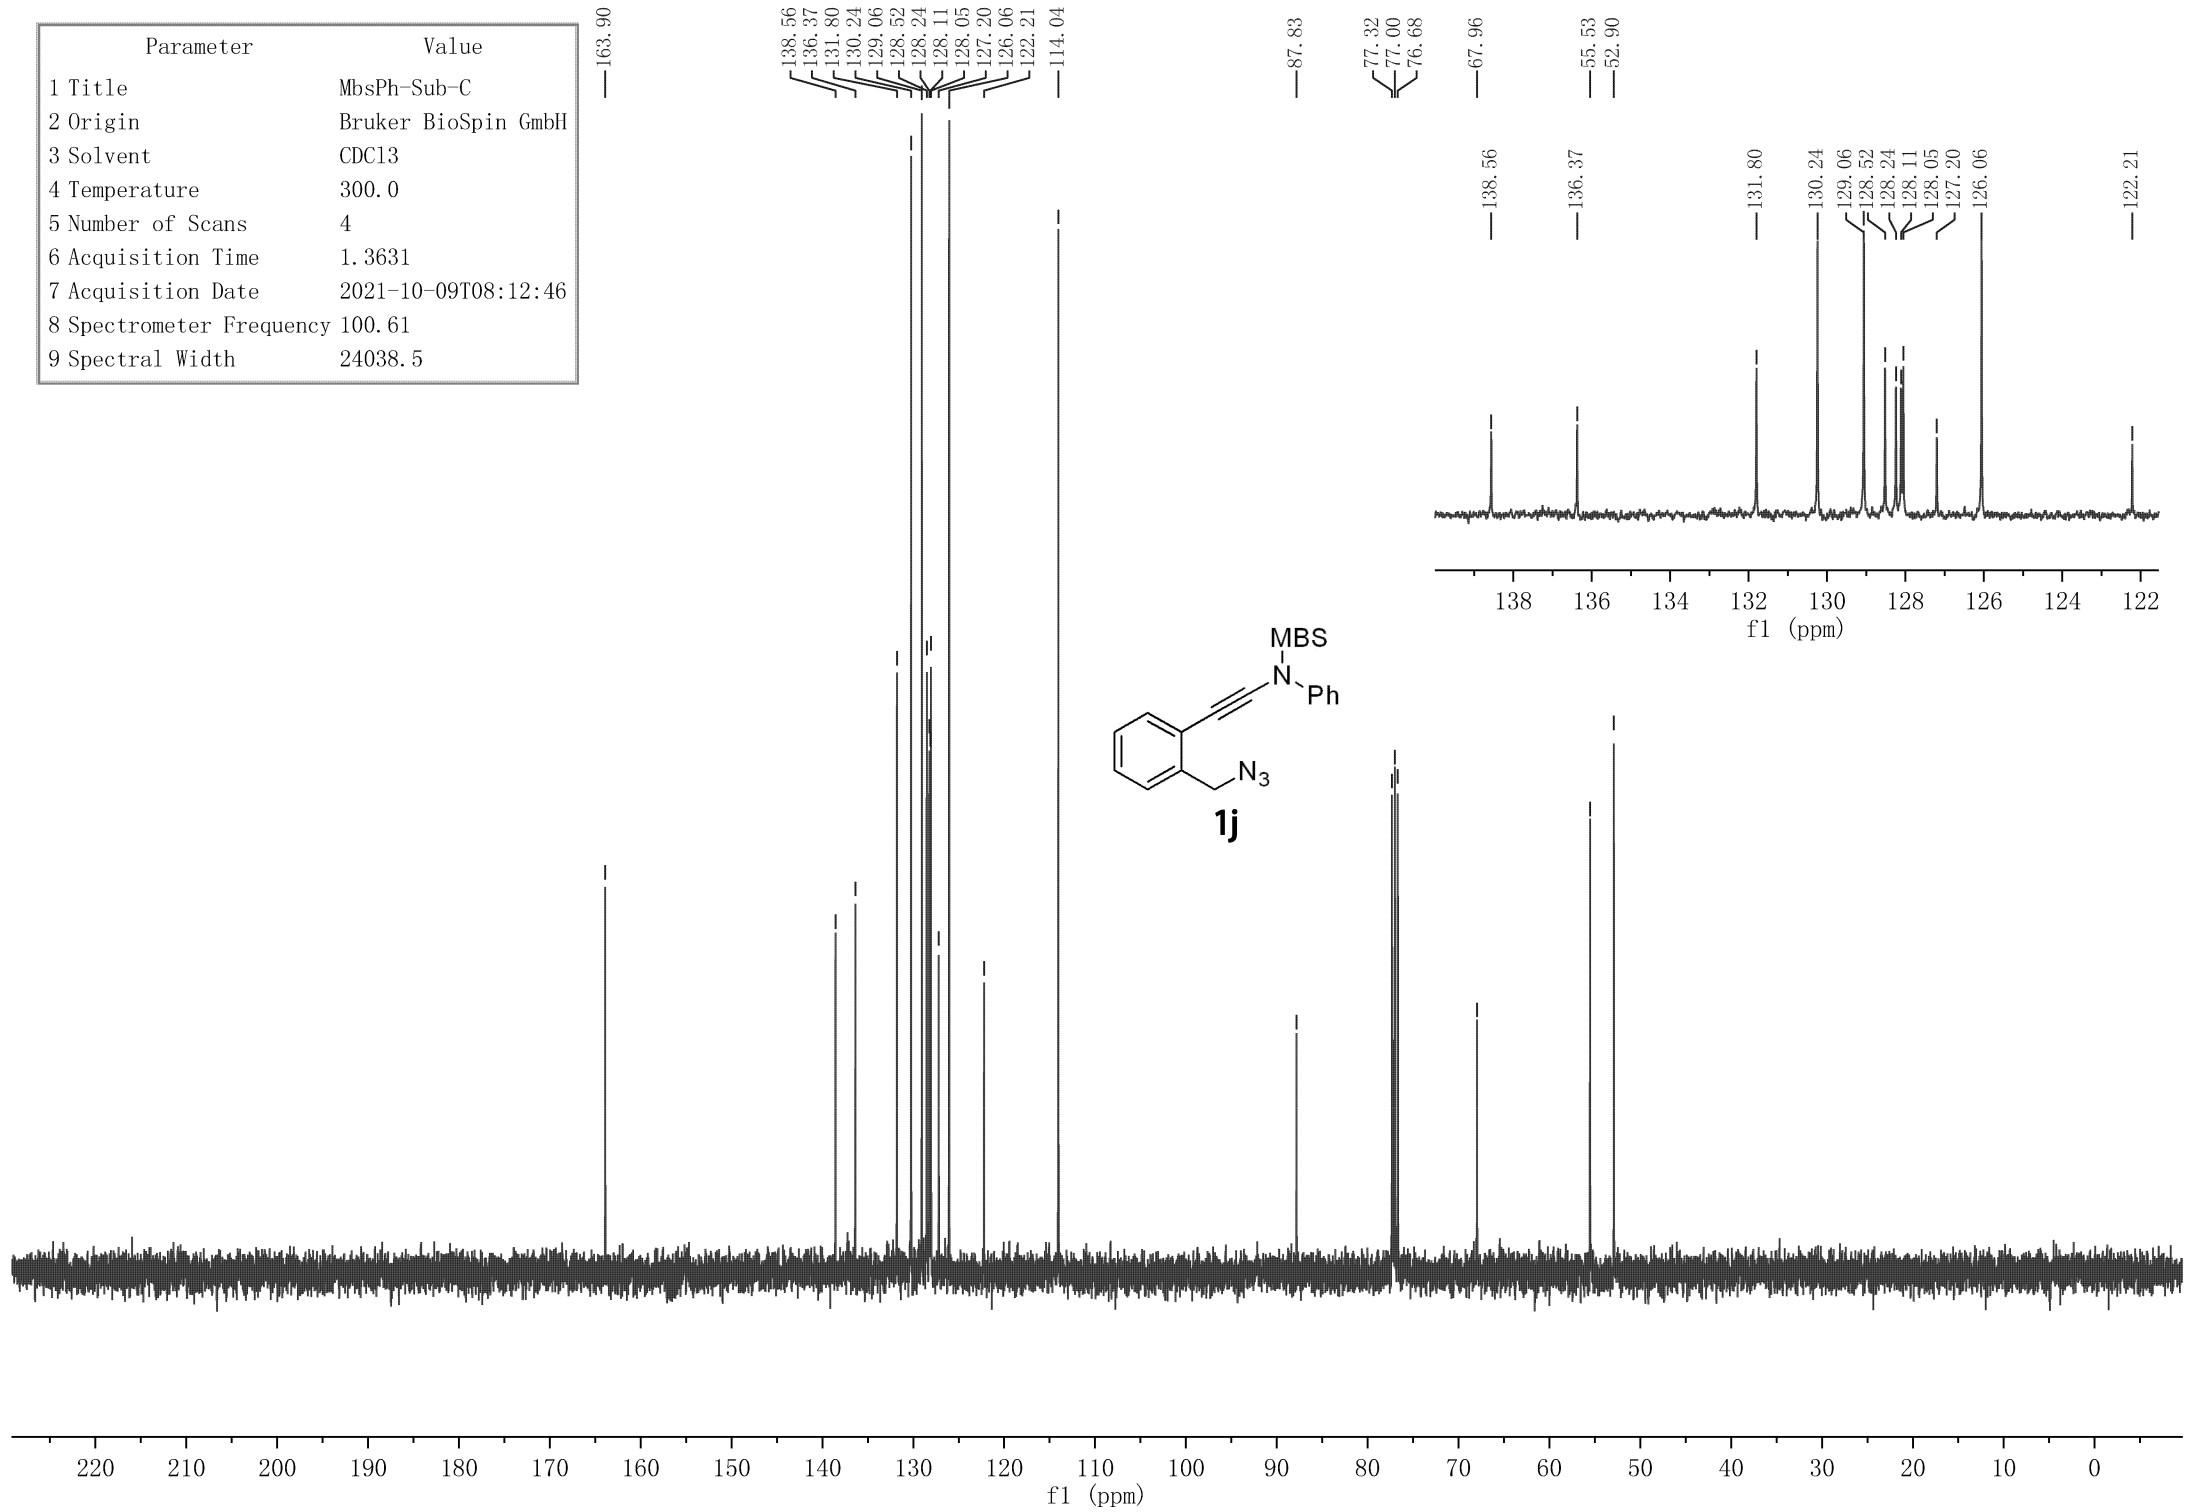

| Parameter                | Value               |
|--------------------------|---------------------|
| 1 Title                  | 4-F-Sub-1H          |
| 2 Origin                 | Bruker BioSpin GmbH |
| 3 Solvent                | CDC13               |
| 4 Temperature            | 298.0               |
| 5 Number of Scans        | 8                   |
| 6 Acquisition Time       | 4.0894              |
| 7 Acquisition Date       | 2021-10-07T14:05:45 |
| 8 Spectrometer Frequency | 400.13              |
| 9 Spectral Width         | 8012.8              |

7.909  
7.887  
7.325  
7.311  
7.304  
7.290  
7.092  
7.085  
7.069  
7.063  
7.040  
7.018  
7.007  
7.000  
6.986  
6.979  
6.965  
6.958

4.426  
3.874  
3.541  
3.523  
3.505  
3.487

1.307  
1.289  
1.271

7.325  
7.311  
7.304  
7.290  
7.092  
7.085  
7.069  
7.063  
7.040  
7.018  
7.007  
7.000  
6.986  
6.979

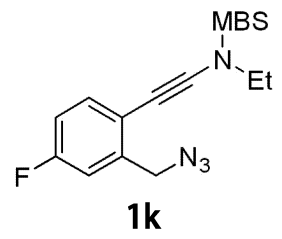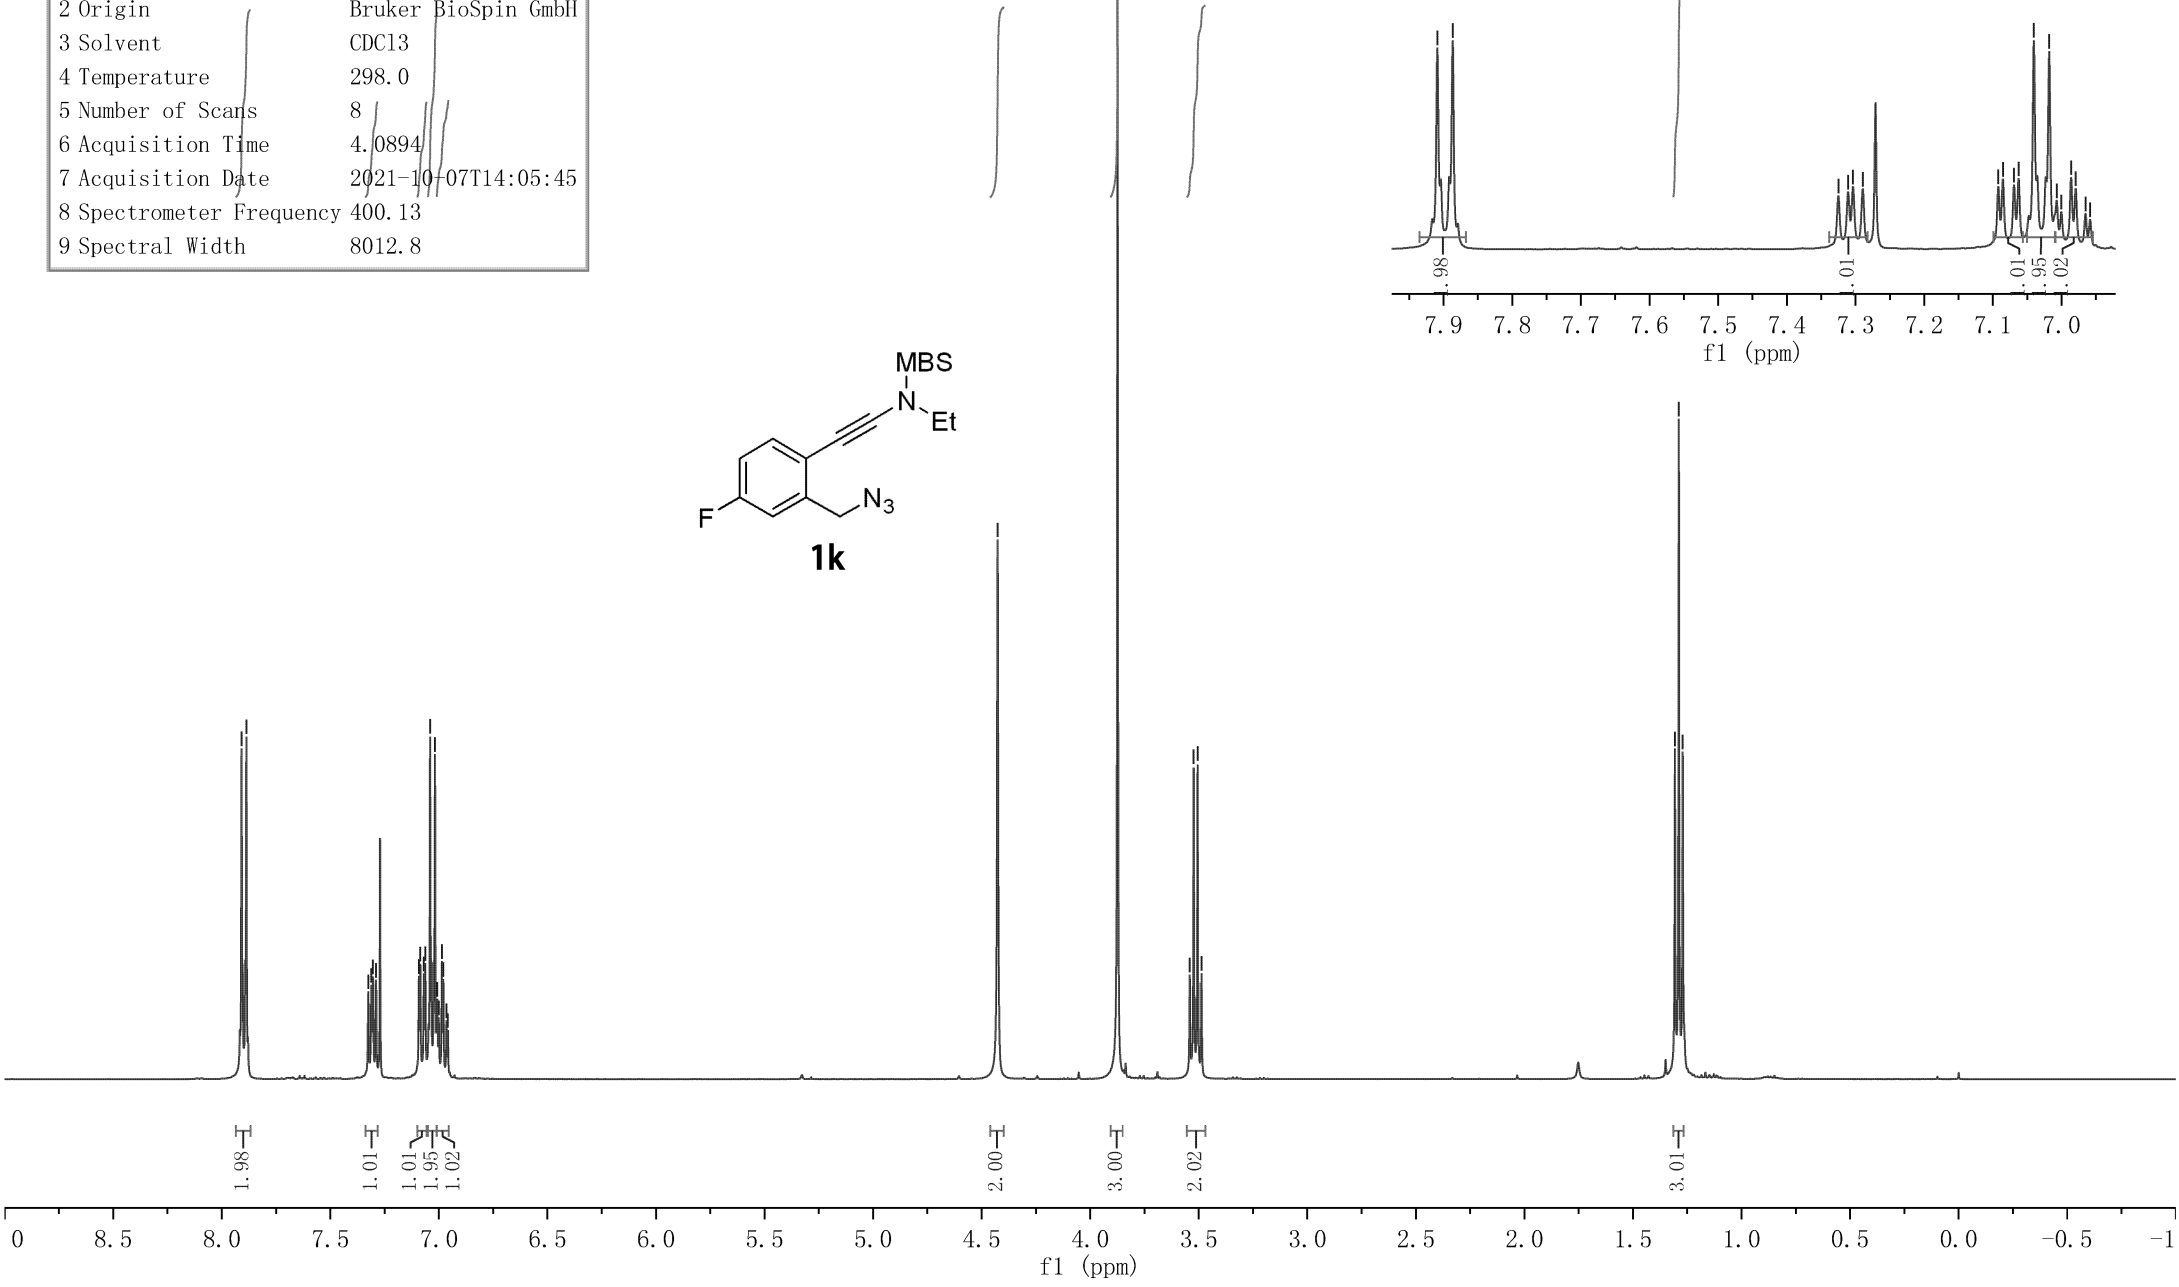

| Parameter                | Value               |
|--------------------------|---------------------|
| 1 Title                  | 4-F-Sub-C           |
| 2 Origin                 | Bruker BioSpin GmbH |
| 3 Solvent                | CDCl3               |
| 4 Temperature            | 300.0               |
| 5 Number of Scans        | 11                  |
| 6 Acquisition Time       | 1.3631              |
| 7 Acquisition Date       | 2021-10-07T14:06:50 |
| 8 Spectrometer Frequency | 100.61              |
| 9 Spectral Width         | 24038.5             |

163.79  
163.12  
160.66  
132.10  
132.07  
130.43  
130.34  
129.66  
128.96  
124.71  
124.61  
118.13  
117.90  
115.02  
114.81  
114.41

88.08  
77.32  
77.00  
76.68  
67.96  
67.93  
55.59  
52.34  
46.46

132.10  
132.07  
130.43  
130.34  
129.66  
128.96  
124.71  
124.61  
118.13  
117.90  
115.02  
114.81  
114.41

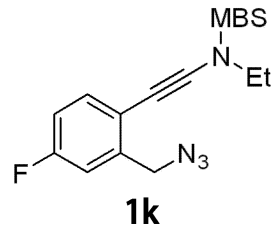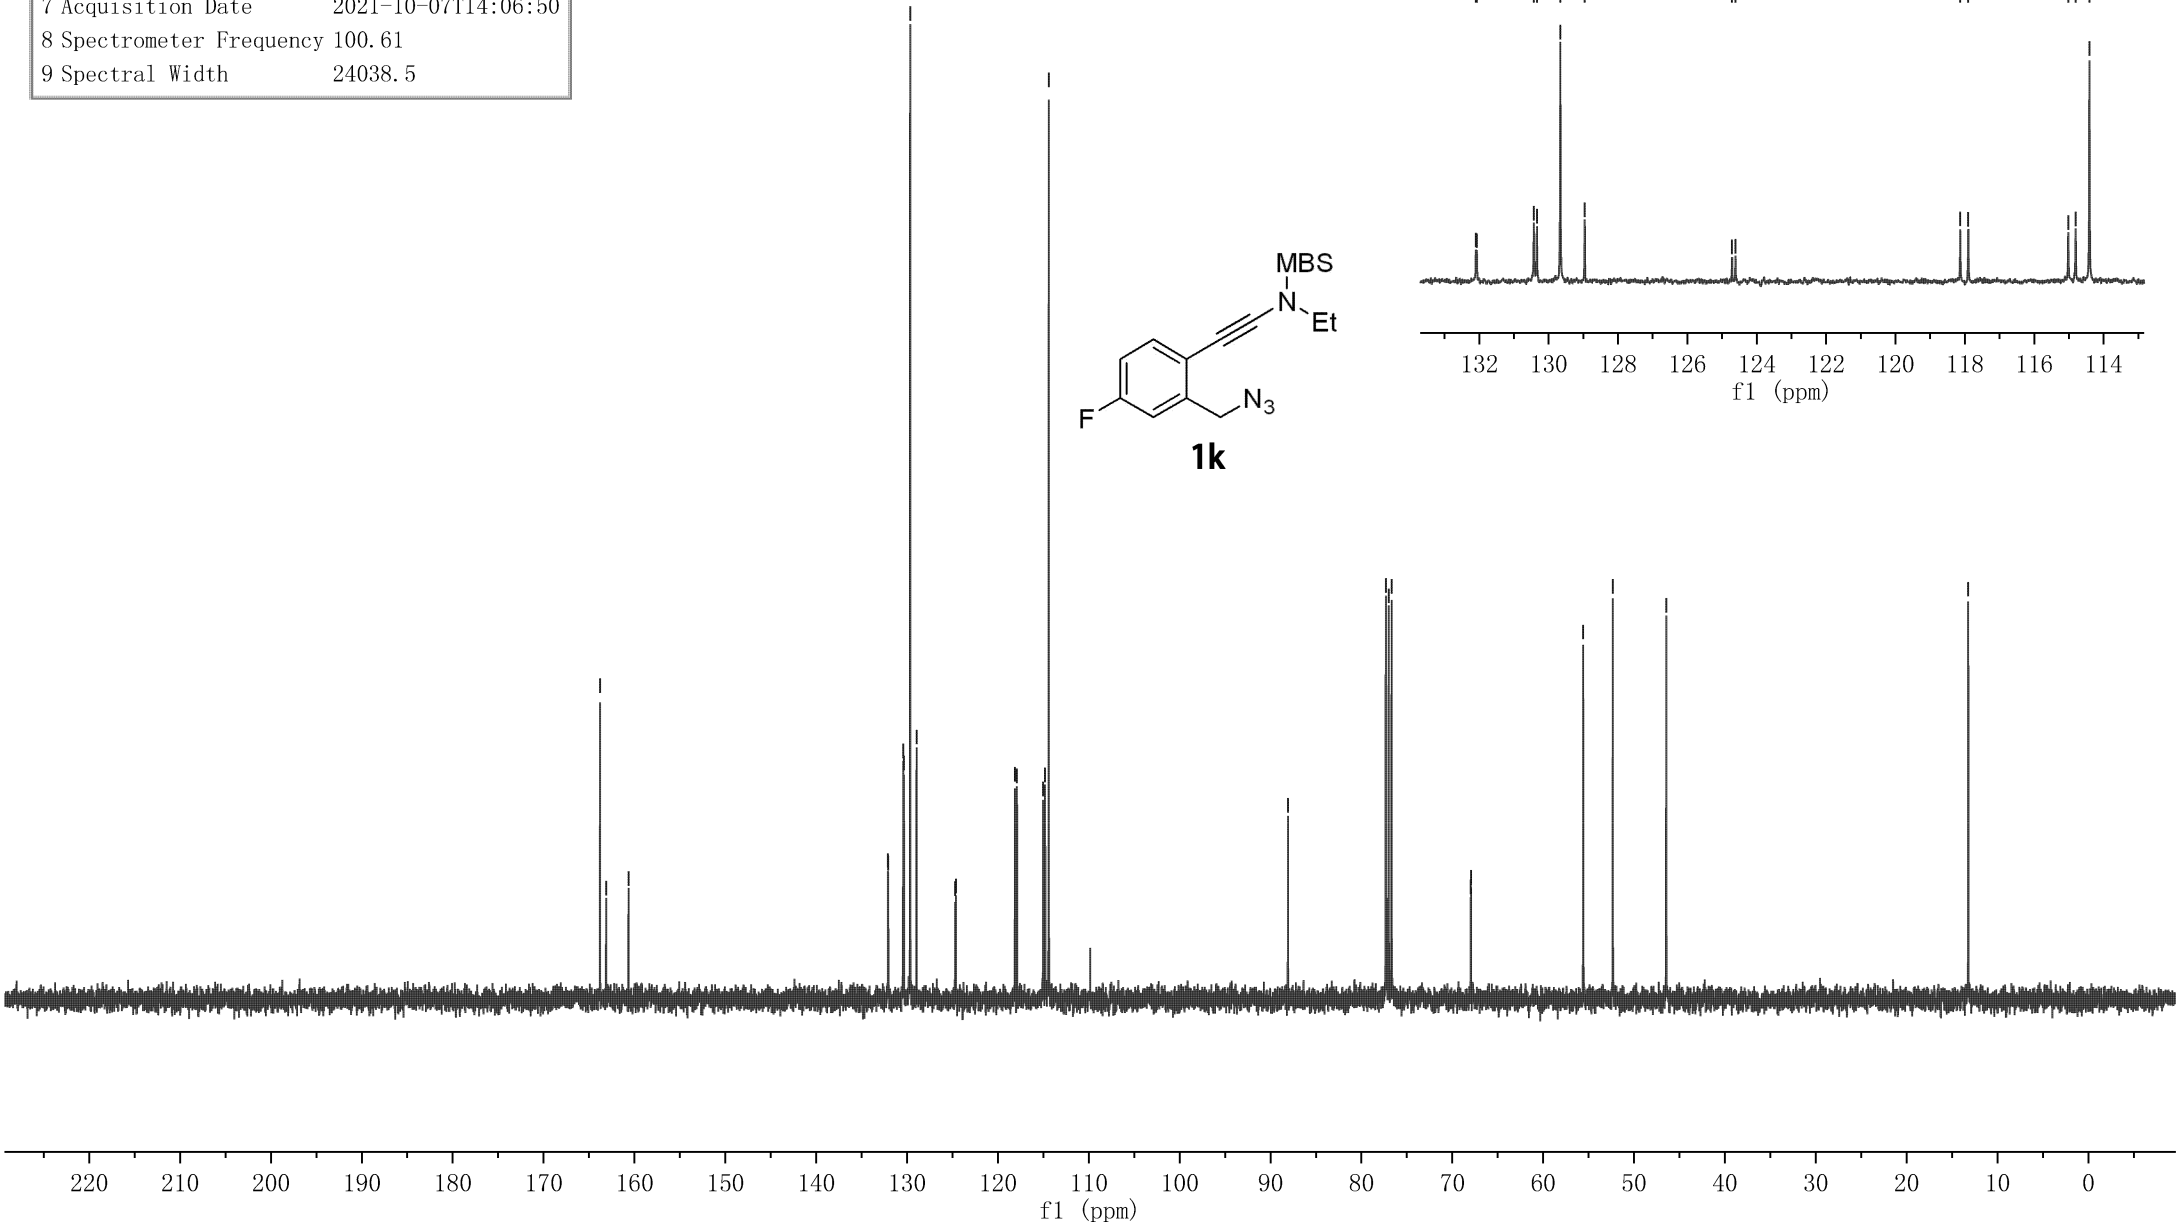

| Parameter                | Value               |
|--------------------------|---------------------|
| 1 Title                  | wcy-4-11-F-Sub      |
| 2 Origin                 | Bruker BioSpin GmbH |
| 3 Solvent                | CDCl3               |
| 4 Temperature            | 295.2               |
| 5 Number of Scans        | 16                  |
| 6 Acquisition Time       | 0.7340              |
| 7 Acquisition Date       | 2022-01-19T18:02:58 |
| 8 Spectrometer Frequency | 376.31              |
| 9 Spectral Width         | 89285.7             |

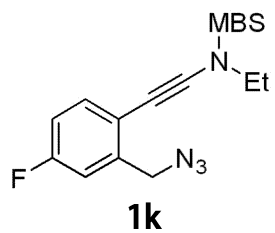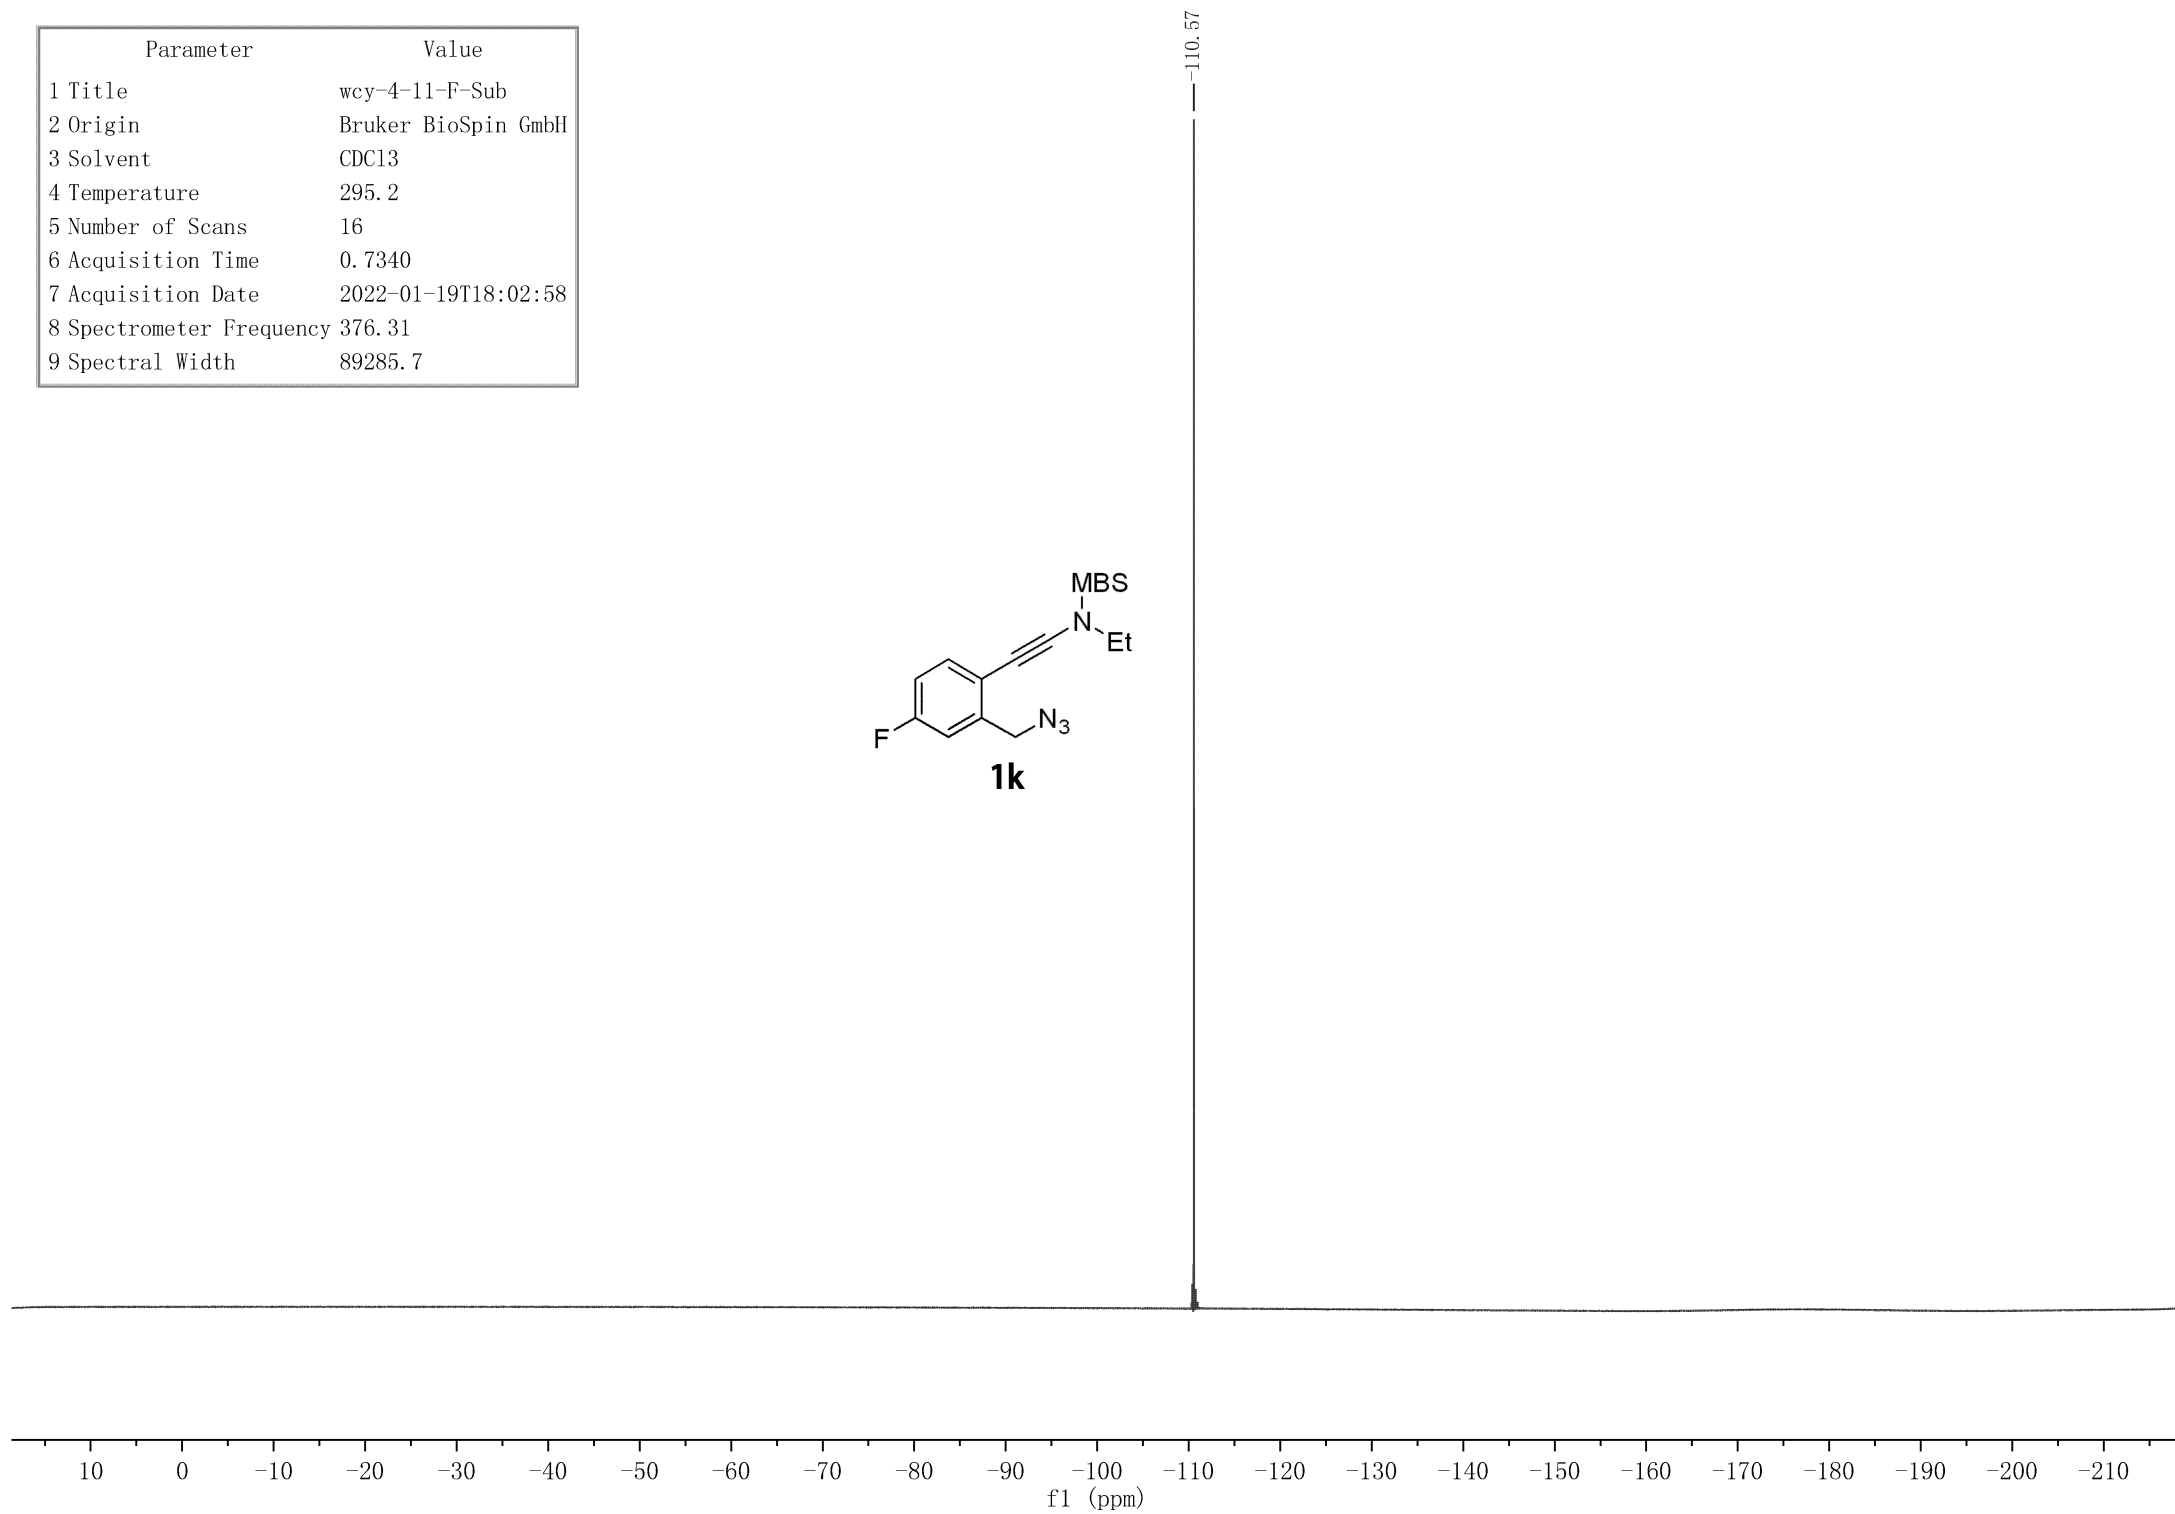



7.895  
7.873  
7.346  
7.342  
7.322  
7.302  
7.237  
7.233  
7.217  
7.212  
7.035  
7.013

| Parameter                | Value               |
|--------------------------|---------------------|
| 1 Title                  | 4-Cl-Sub-1H         |
| 2 Origin                 | Bruker BioSpin GmbH |
| 3 Solvent                | CDC13               |
| 4 Temperature            | 298.0               |
| 5 Number of Scans        | 8                   |
| 6 Acquisition Time       | 4.0894              |
| 7 Acquisition Date       | 2021-09-19T17:02:23 |
| 8 Spectrometer Frequency | 400.13              |
| 9 Spectral Width         | 8012.8              |

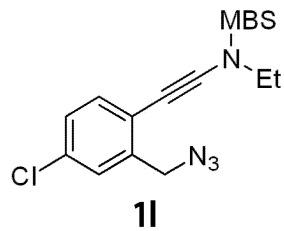

4.437

3.866

3.534  
3.516  
3.498  
3.480

1.298  
1.280  
1.262

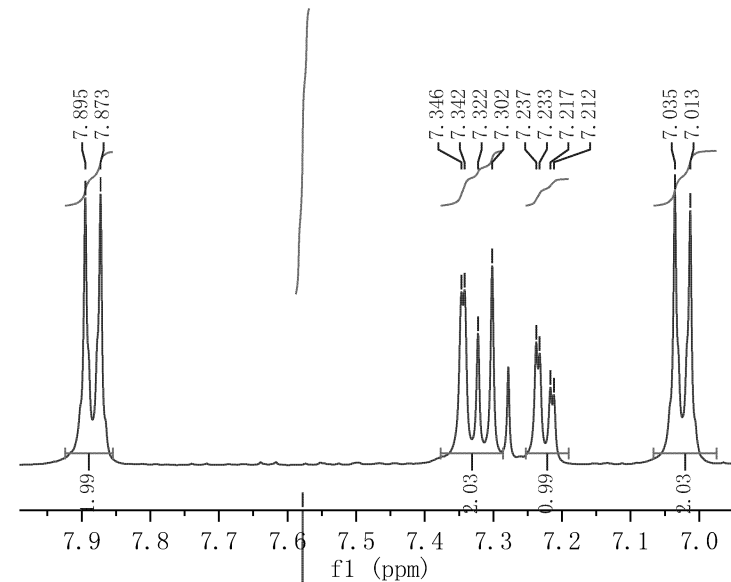

1.99

2.03  
0.99

2.03

1.93

3.00

2.03

3.11

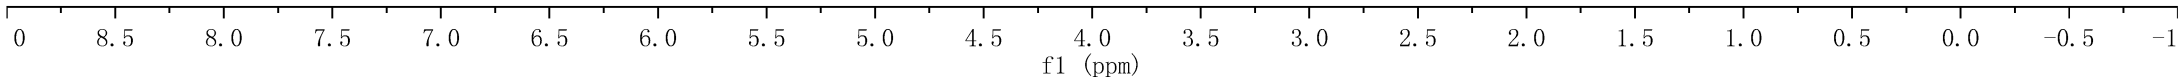

| Parameter                | Value               |
|--------------------------|---------------------|
| 1 Title                  | 4-Cl-Sub-C          |
| 2 Origin                 | Bruker BioSpin GmbH |
| 3 Solvent                | CDCl3               |
| 4 Temperature            | 300.0               |
| 5 Number of Scans        | 24                  |
| 6 Acquisition Time       | 1.3631              |
| 7 Acquisition Date       | 2021-09-19T17:03:55 |
| 8 Spectrometer Frequency | 100.61              |
| 9 Spectral Width         | 24038.5             |

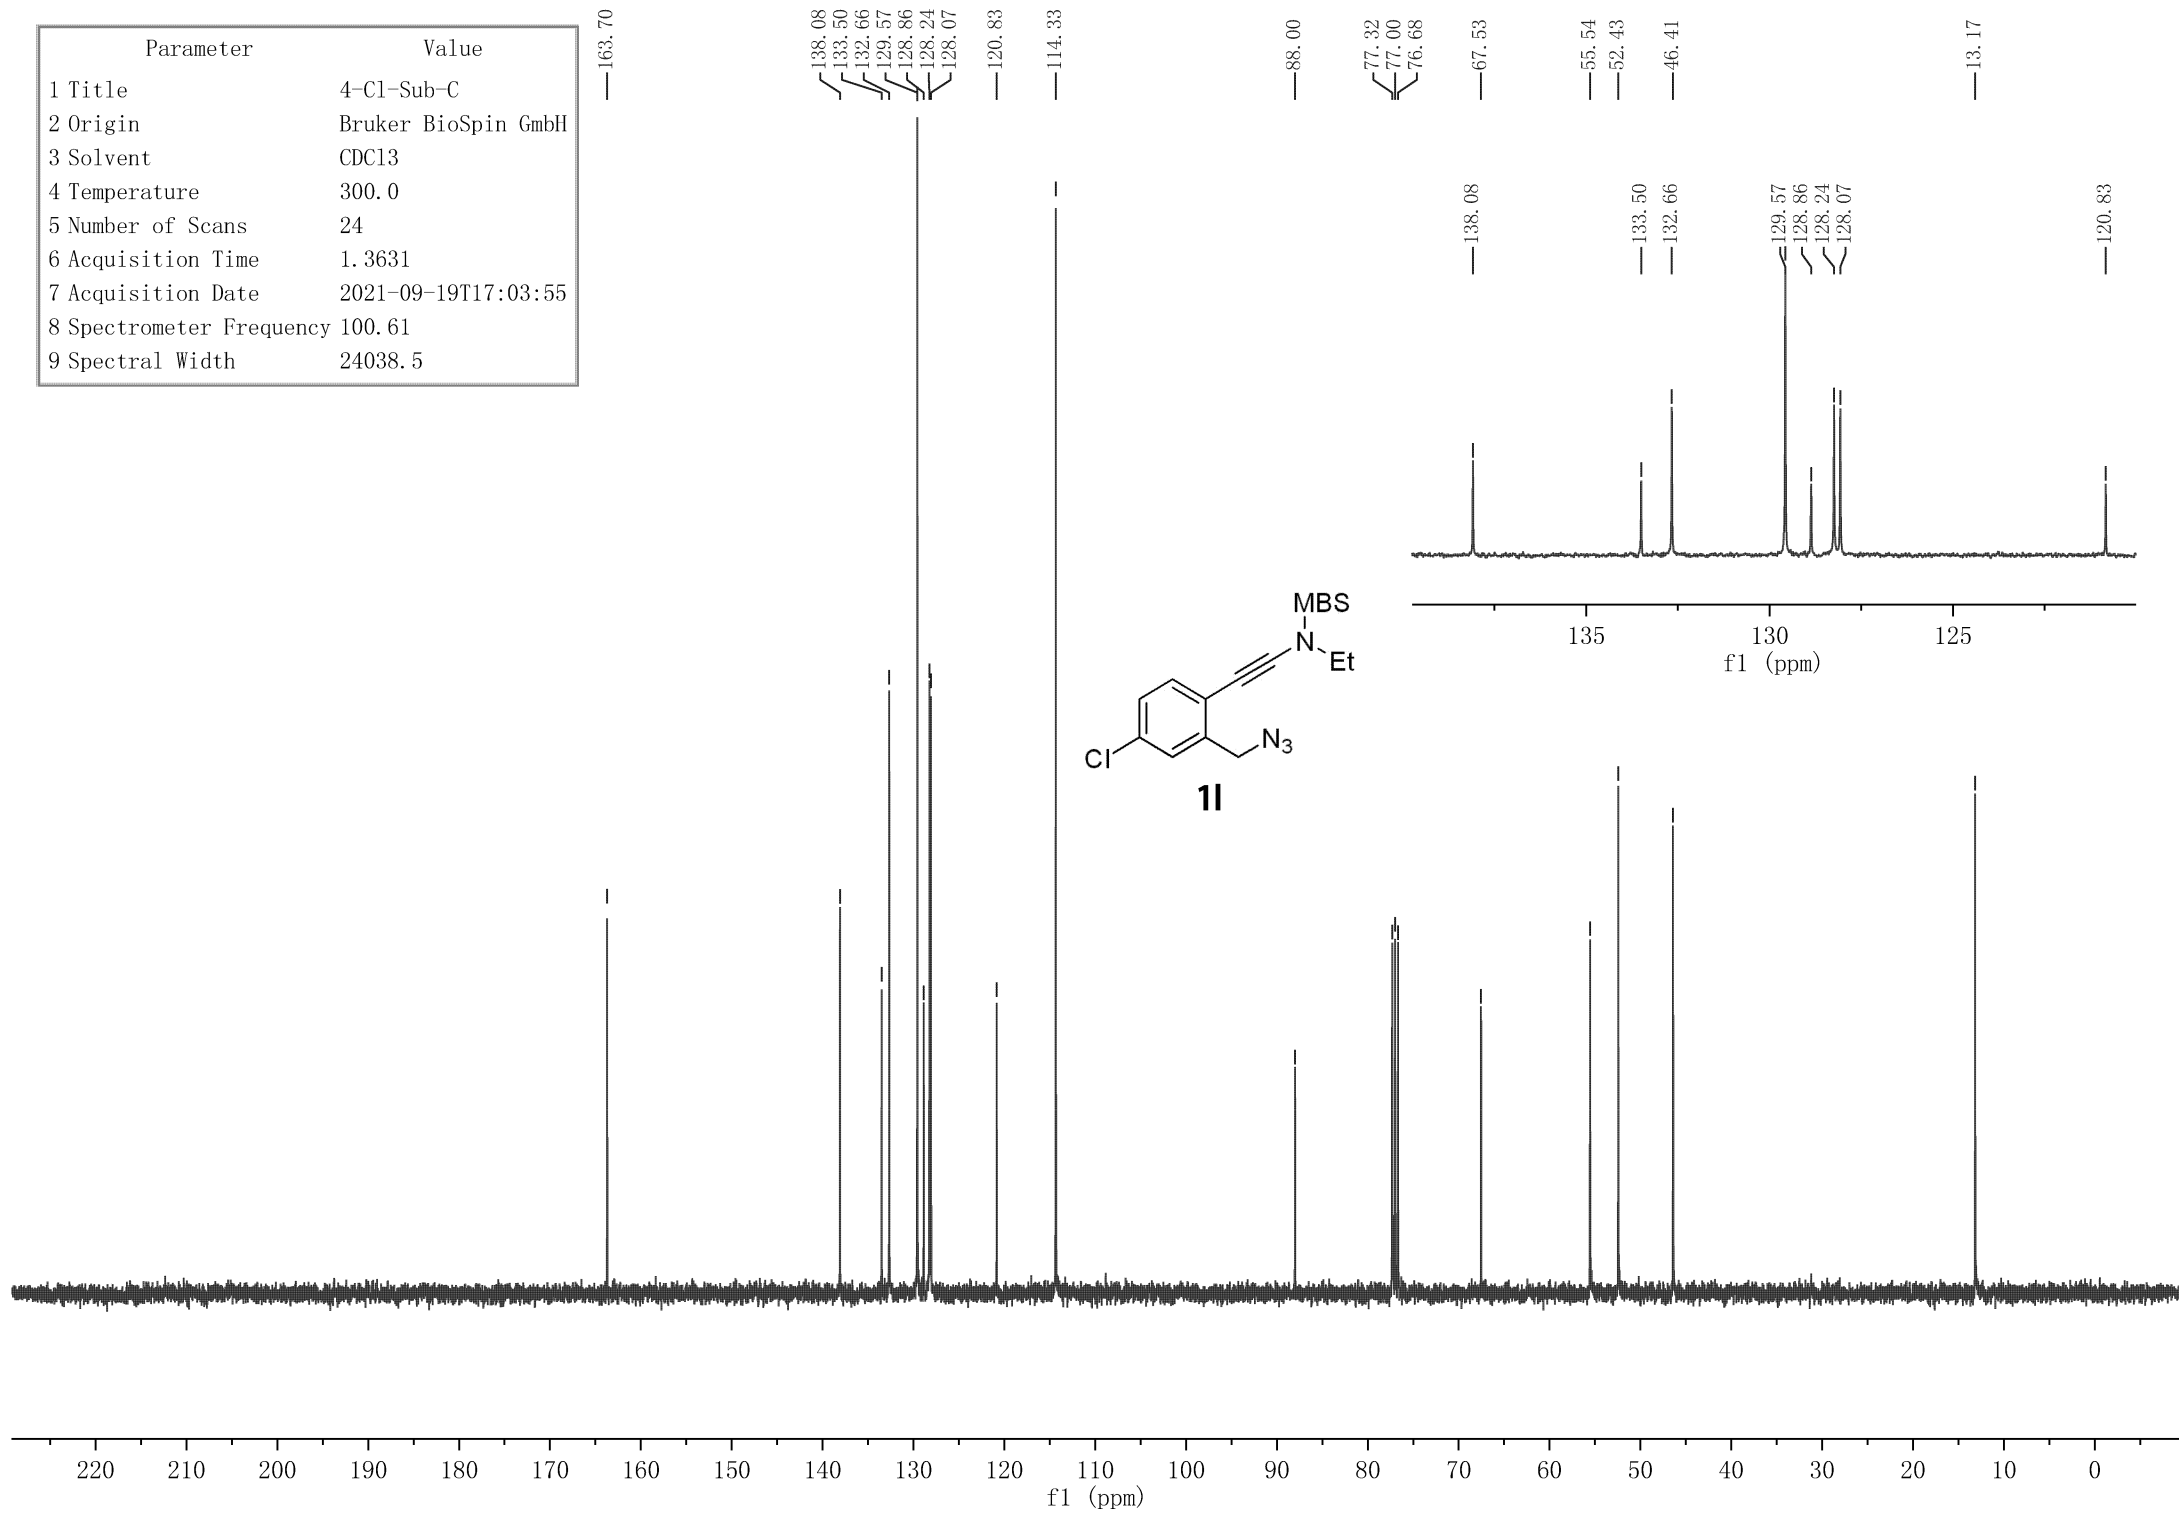

7.898  
7.876  
7.512  
7.508  
7.414  
7.393  
7.389  
7.223  
7.202  
7.038  
7.016

4.413  
3.878  
3.536  
3.518  
3.500  
3.482

1.303  
1.285  
1.267

| Parameter                | Value               |
|--------------------------|---------------------|
| 1 Title                  | 4-Br-H-Sub          |
| 2 Origin                 | Bruker BioSpin GmbH |
| 3 Solvent                | CDC13               |
| 4 Temperature            | 298.0               |
| 5 Number of Scans        | 6                   |
| 6 Acquisition Time       | 4.0894              |
| 7 Acquisition Date       | 2021-09-08T15:11:32 |
| 8 Spectrometer Frequency | 400.13              |
| 9 Spectral Width         | 8012.8              |

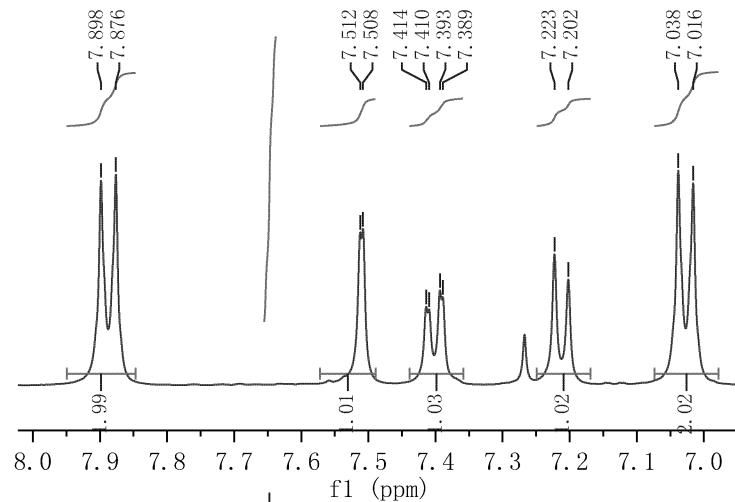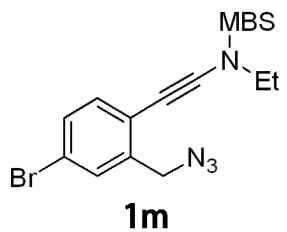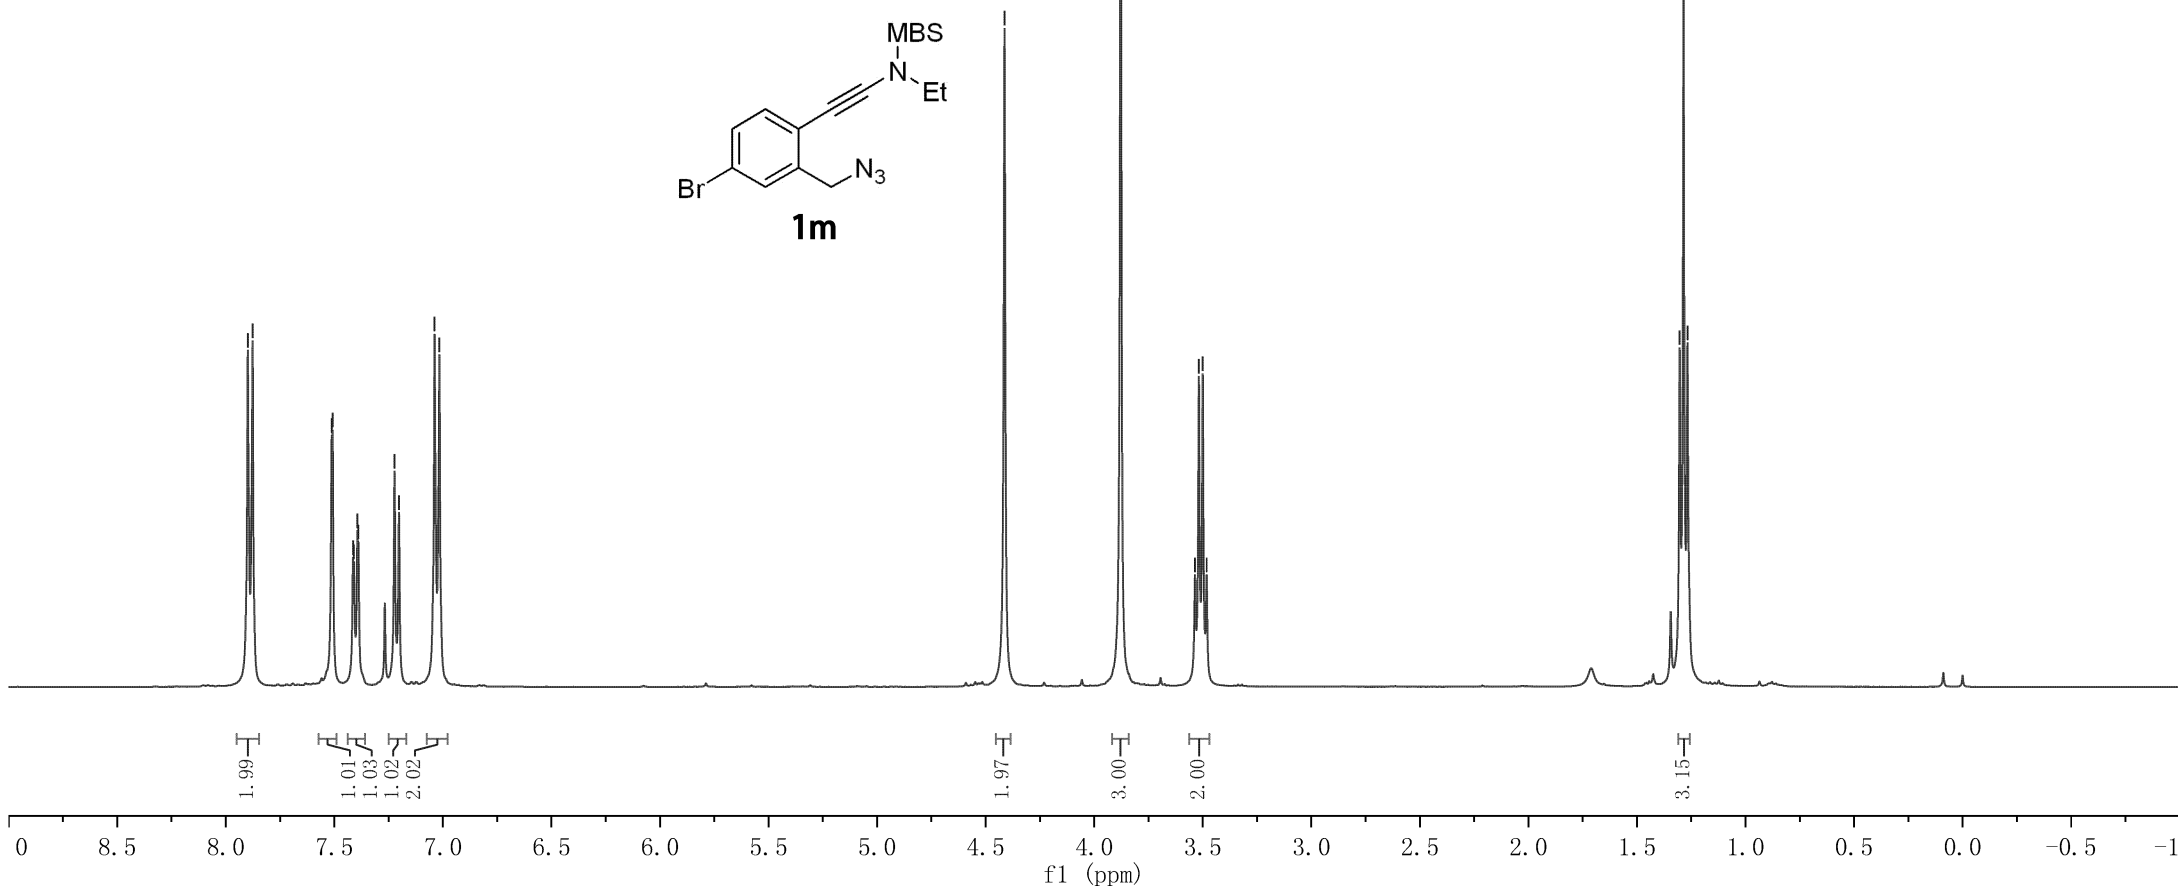

| Parameter                | Value               |
|--------------------------|---------------------|
| 1 Title                  | 4-Br-C-Sub          |
| 2 Origin                 | Bruker BioSpin GmbH |
| 3 Solvent                | CDC13               |
| 4 Temperature            | 300.0               |
| 5 Number of Scans        | 17                  |
| 6 Acquisition Time       | 1.3631              |
| 7 Acquisition Date       | 2021-09-08T15:12:39 |
| 8 Spectrometer Frequency | 100.61              |
| 9 Spectral Width         | 24038.5             |

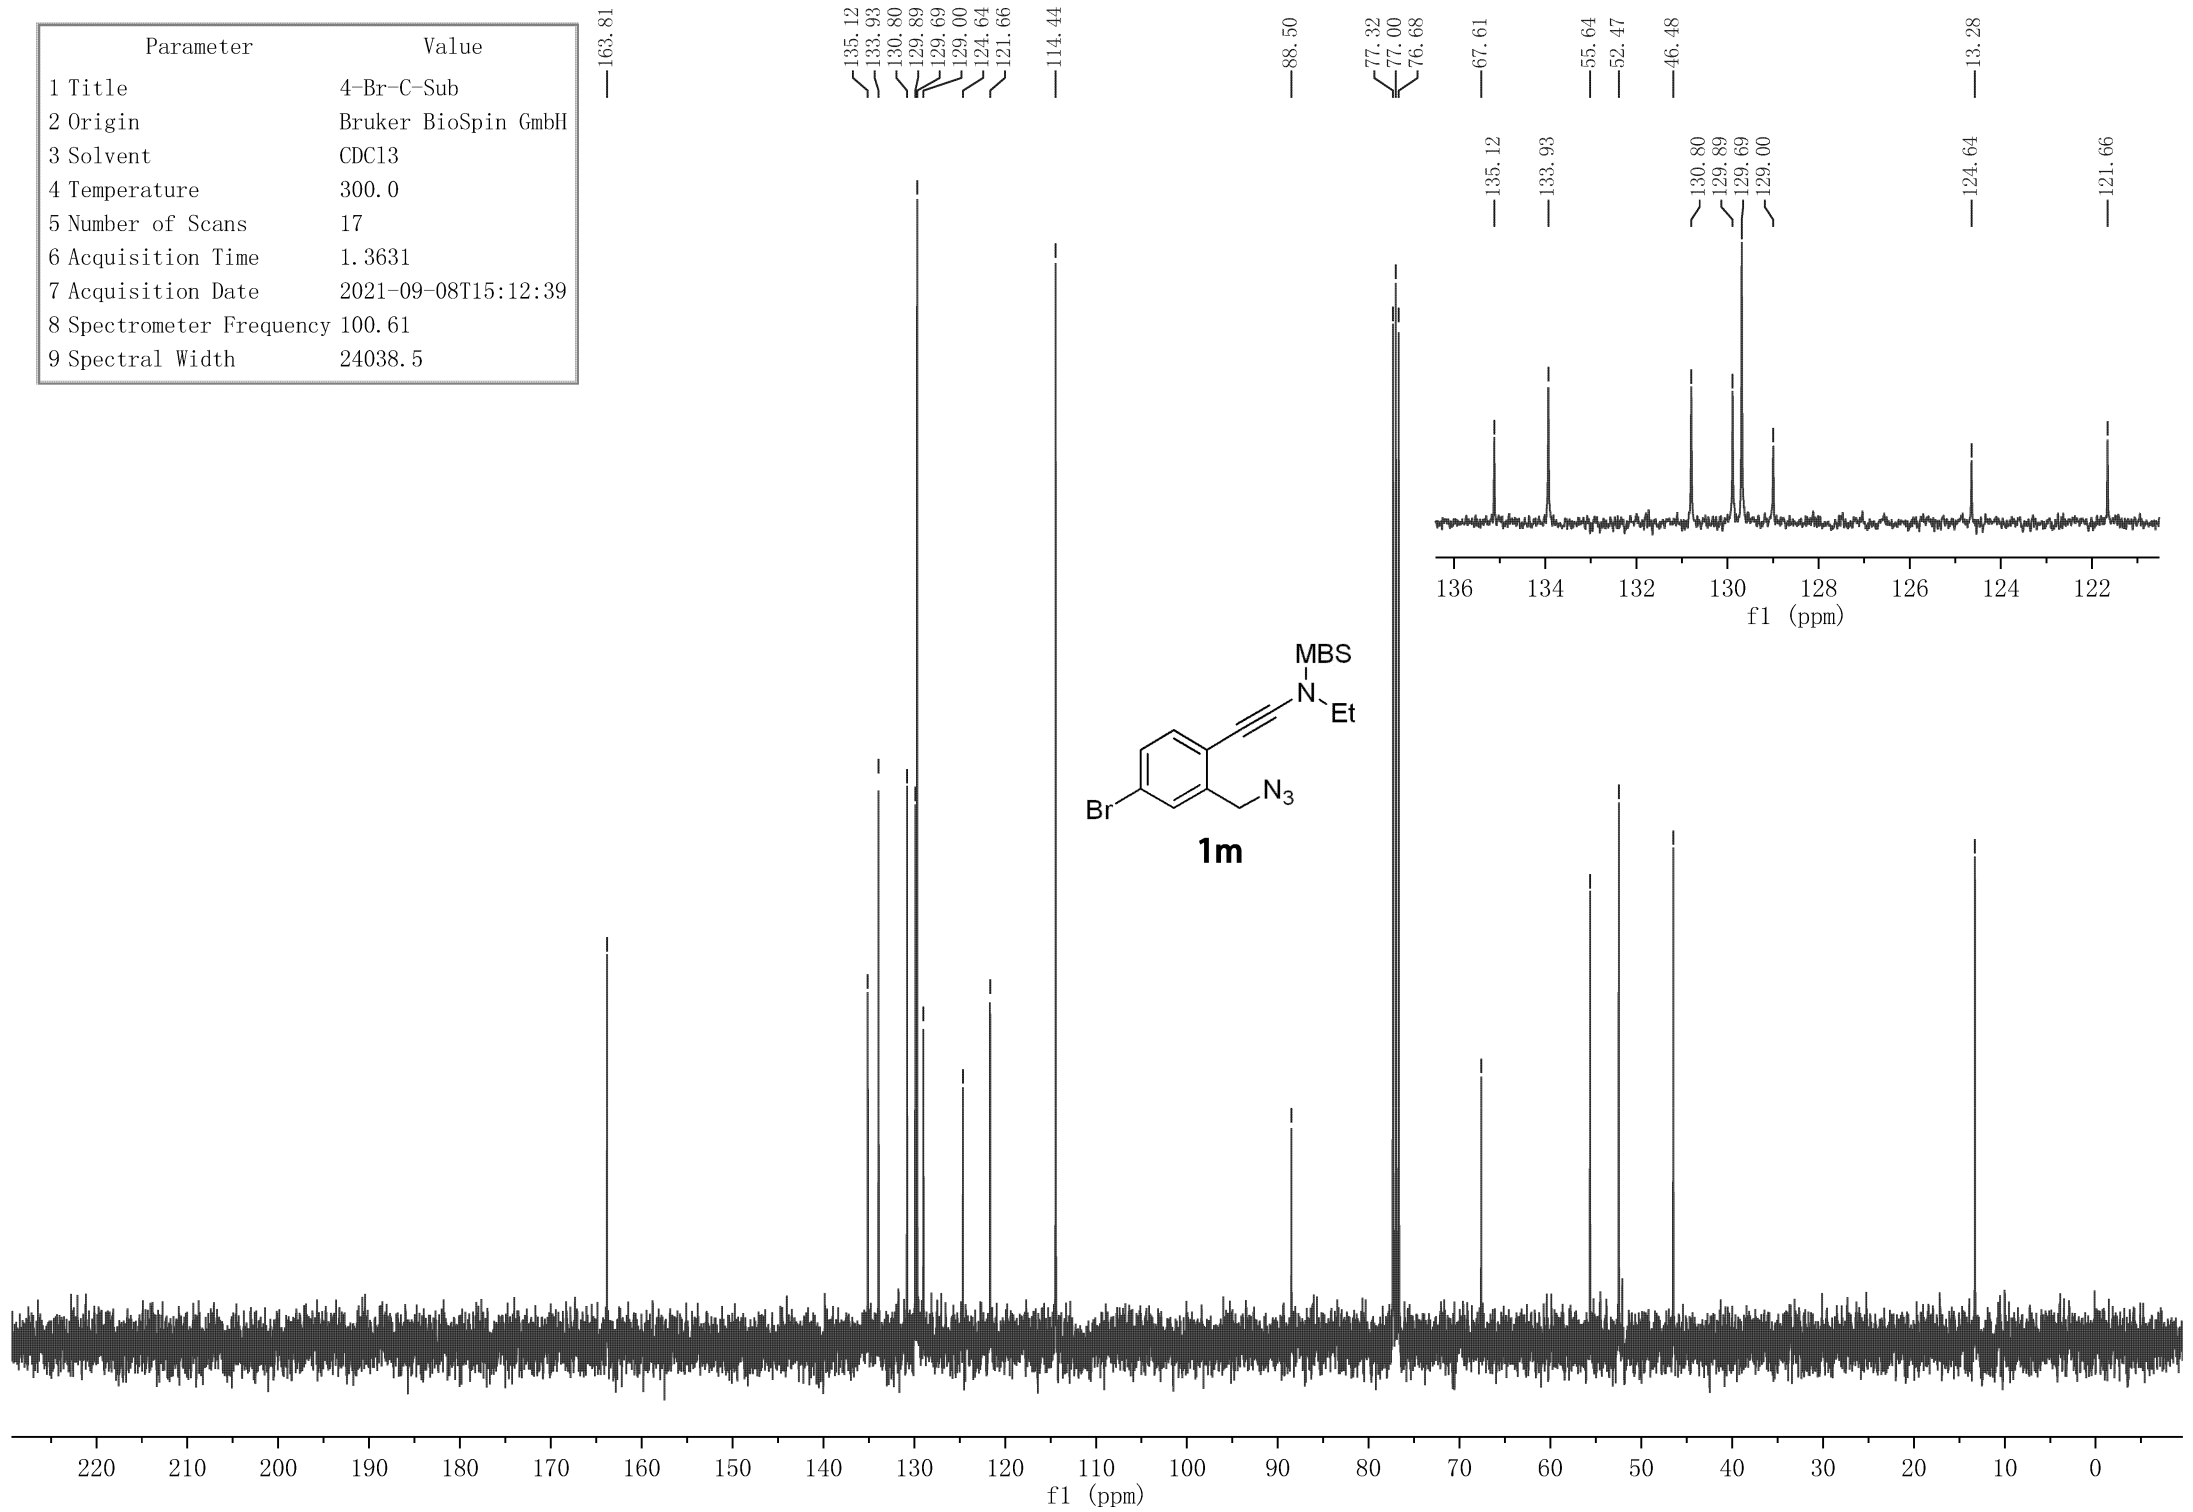

7.902  
7.880

7.306  
7.286  
7.149  
7.081  
7.062  
7.018  
6.996

4.408

3.854

3.522  
3.504  
3.486  
3.468

2.340

1.294  
1.276  
1.258

| Parameter                | Value               |
|--------------------------|---------------------|
| 1 Title                  | 4-Me-Sub-1H         |
| 2 Origin                 | Bruker BioSpin GmbH |
| 3 Solvent                | CDC13               |
| 4 Temperature            | 298.0               |
| 5 Number of Scans        | 5                   |
| 6 Acquisition Time       | 4.0894              |
| 7 Acquisition Date       | 2021-10-20T09:21:46 |
| 8 Spectrometer Frequency | 400.13              |
| 9 Spectral Width         | 8012.8              |

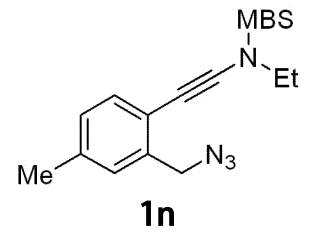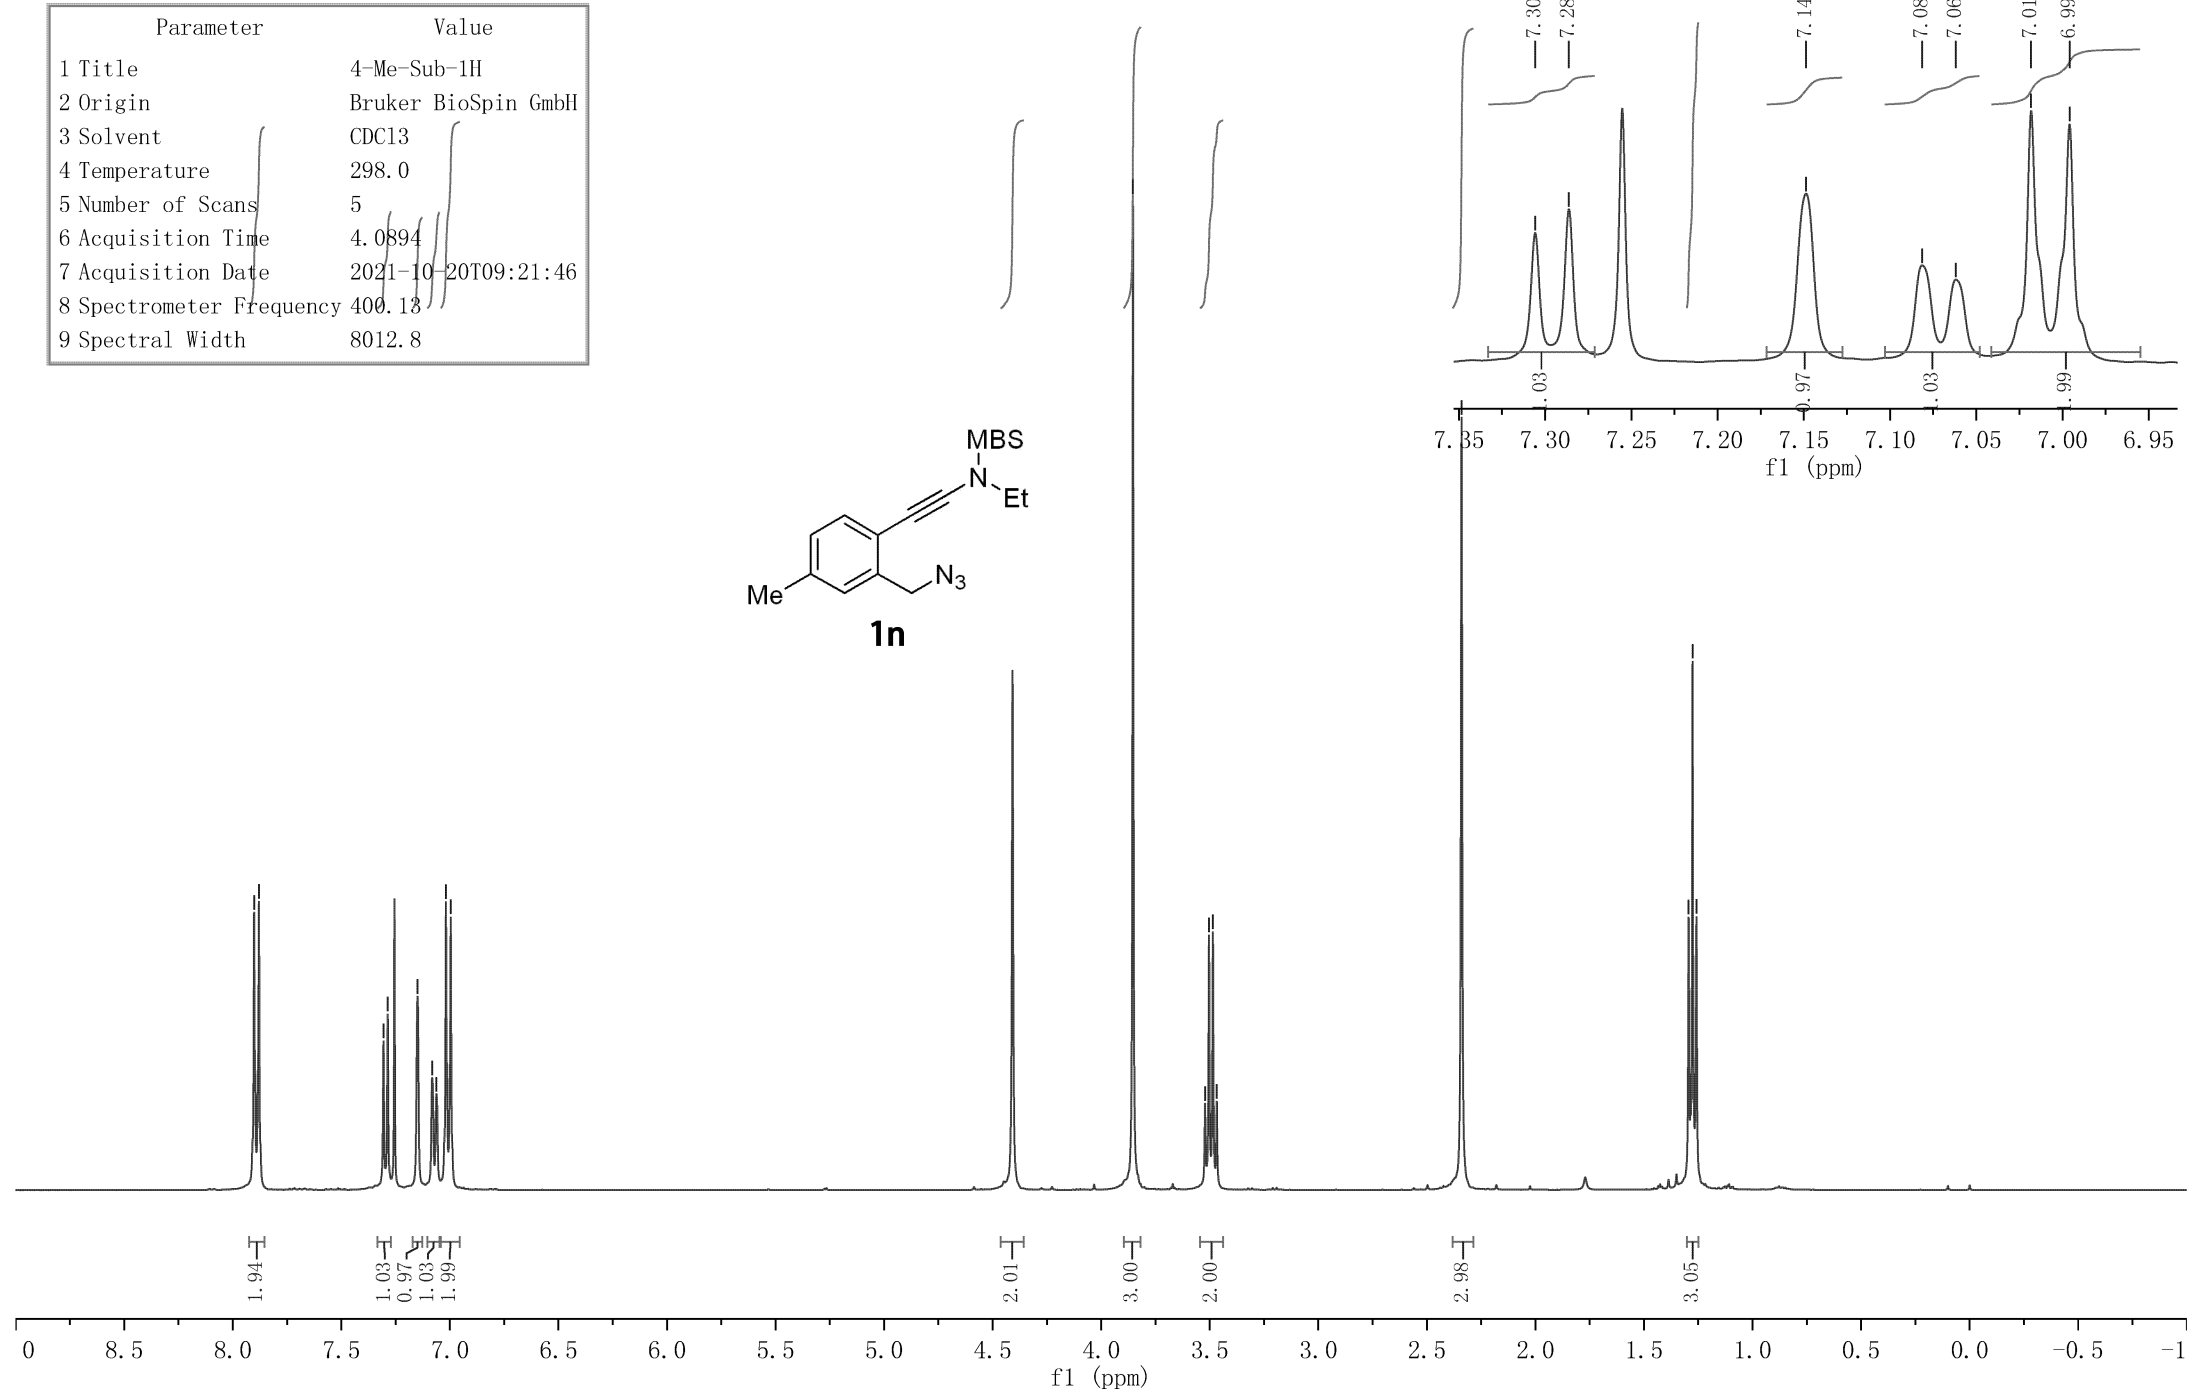

| Parameter                | Value               |
|--------------------------|---------------------|
| 1 Title                  | 4-Me-Sub-C          |
| 2 Origin                 | Bruker BioSpin GmbH |
| 3 Solvent                | CDCl3               |
| 4 Temperature            | 300.0               |
| 5 Number of Scans        | 16                  |
| 6 Acquisition Time       | 1.3631              |
| 7 Acquisition Date       | 2021-10-20T09:23:20 |
| 8 Spectrometer Frequency | 100.61              |
| 9 Spectral Width         | 24038.5             |

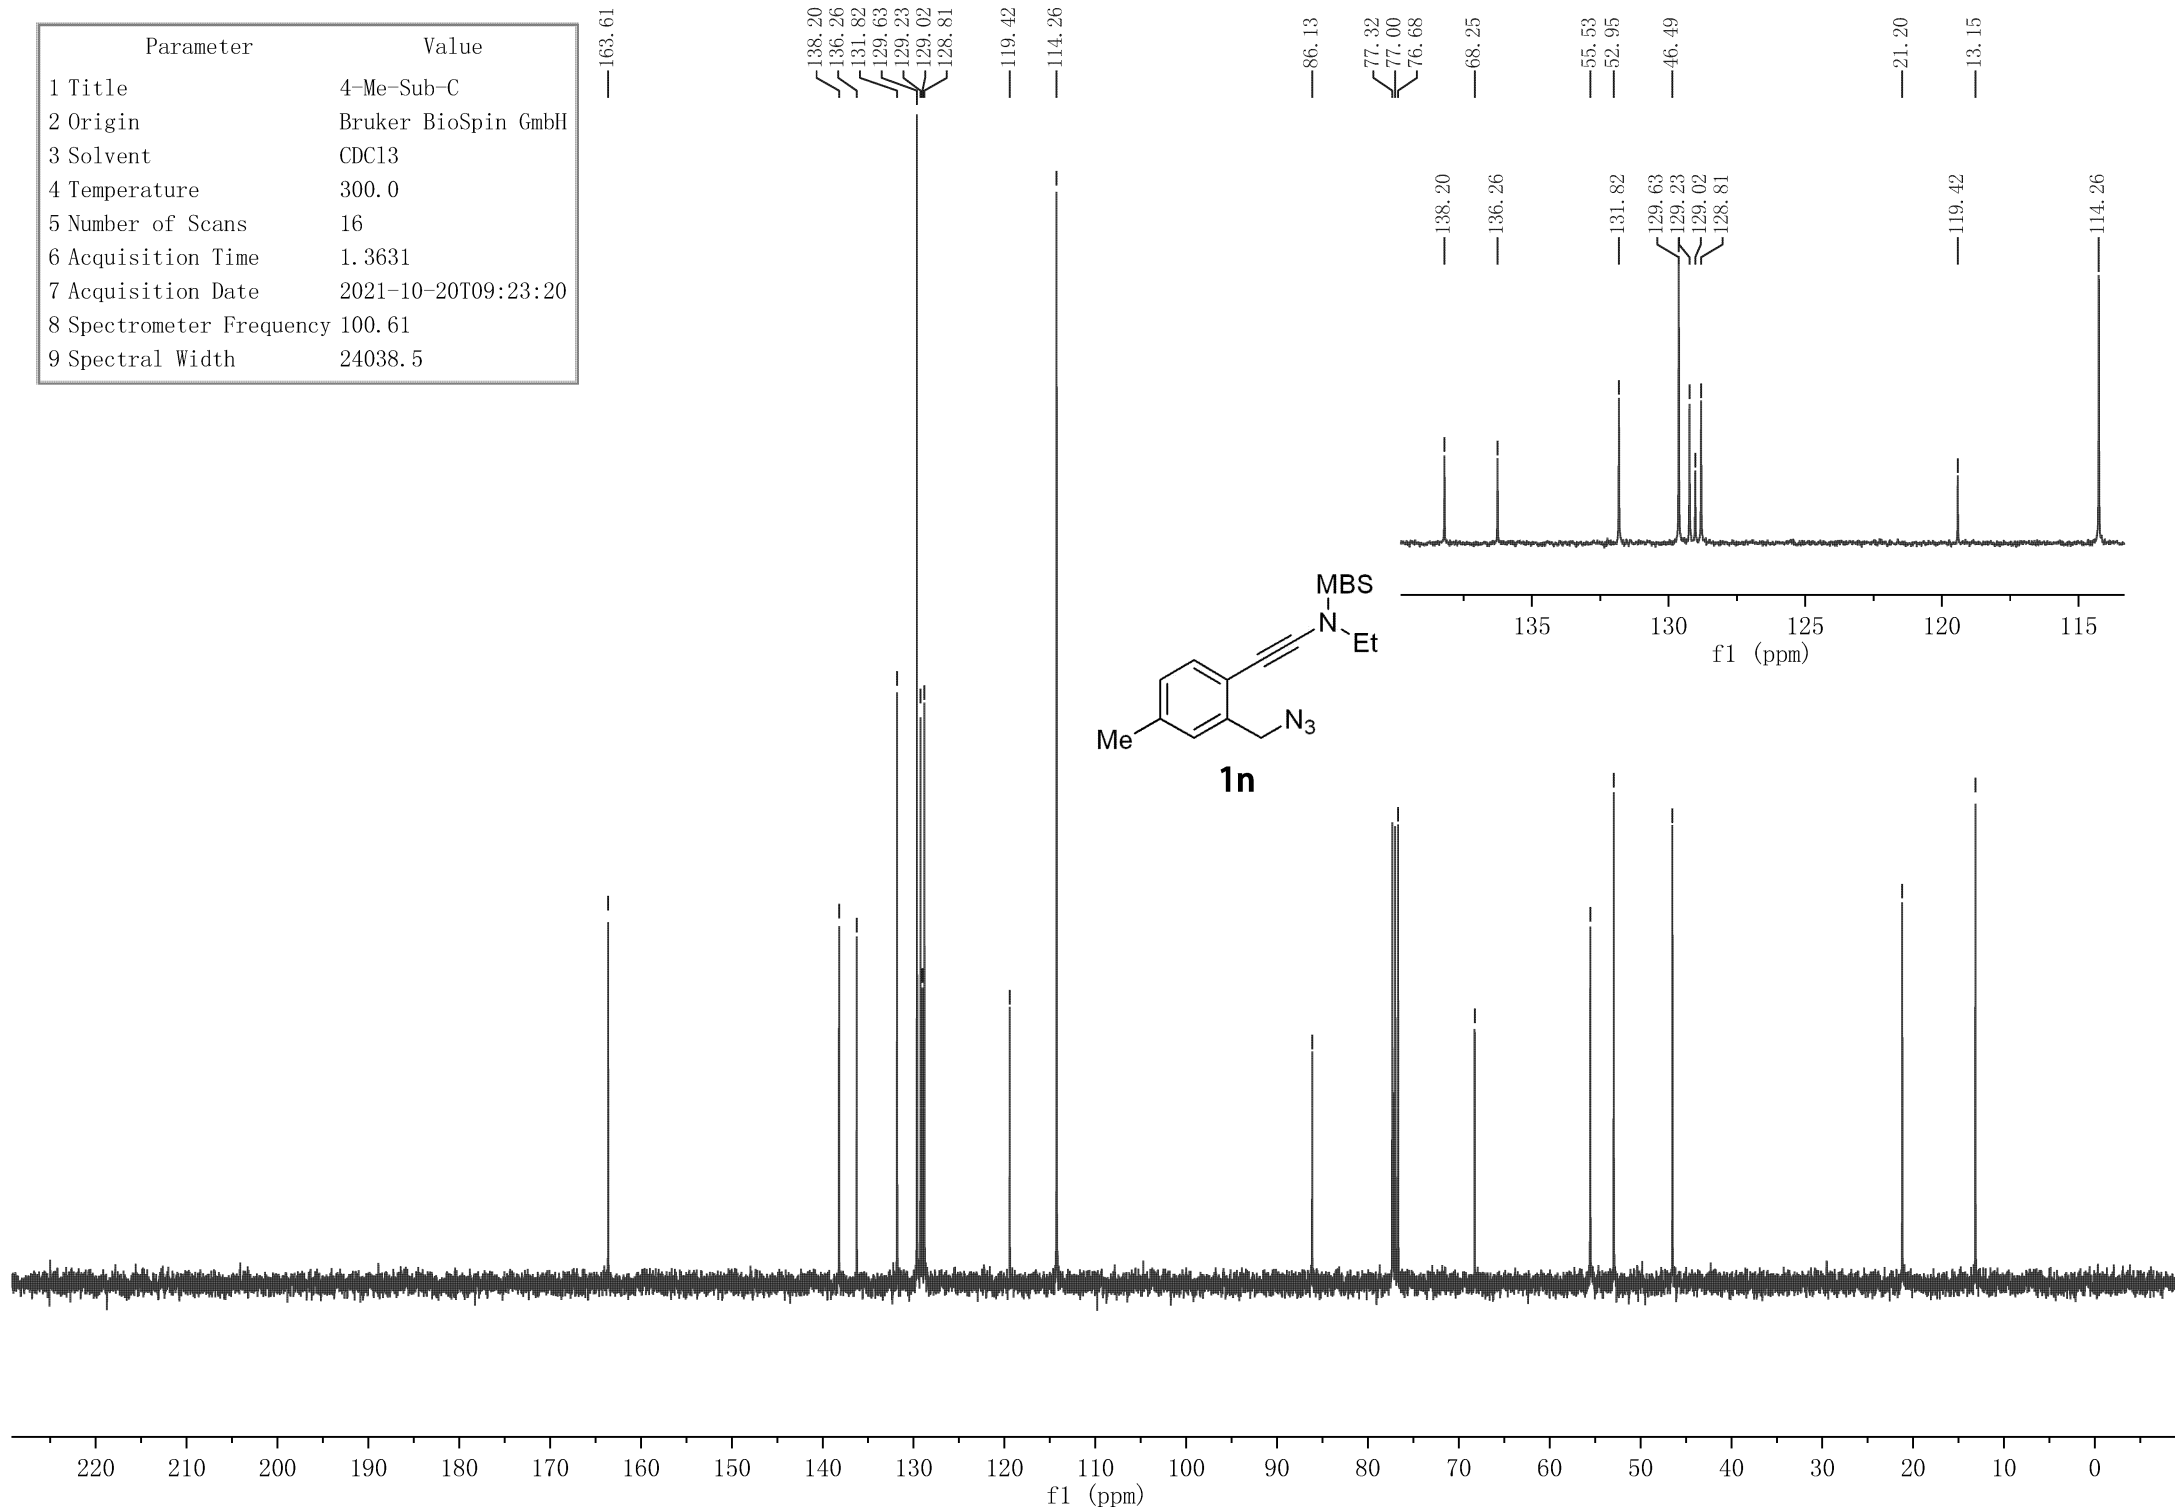

| Parameter                | Value               |
|--------------------------|---------------------|
| 1 Title                  | wcy-2-11t-1-H-new   |
| 2 Origin                 | Bruker BioSpin GmbH |
| 3 Solvent                | CDC13               |
| 4 Temperature            | 298.0               |
| 5 Number of Scans        | 10                  |
| 6 Acquisition Time       | 4.0894              |
| 7 Acquisition Date       | 2021-09-19T19:02:59 |
| 8 Spectrometer Frequency | 400.13              |
| 9 Spectral Width         | 8012.8              |

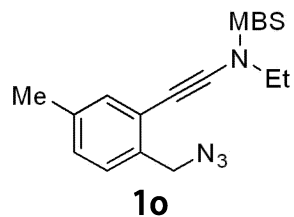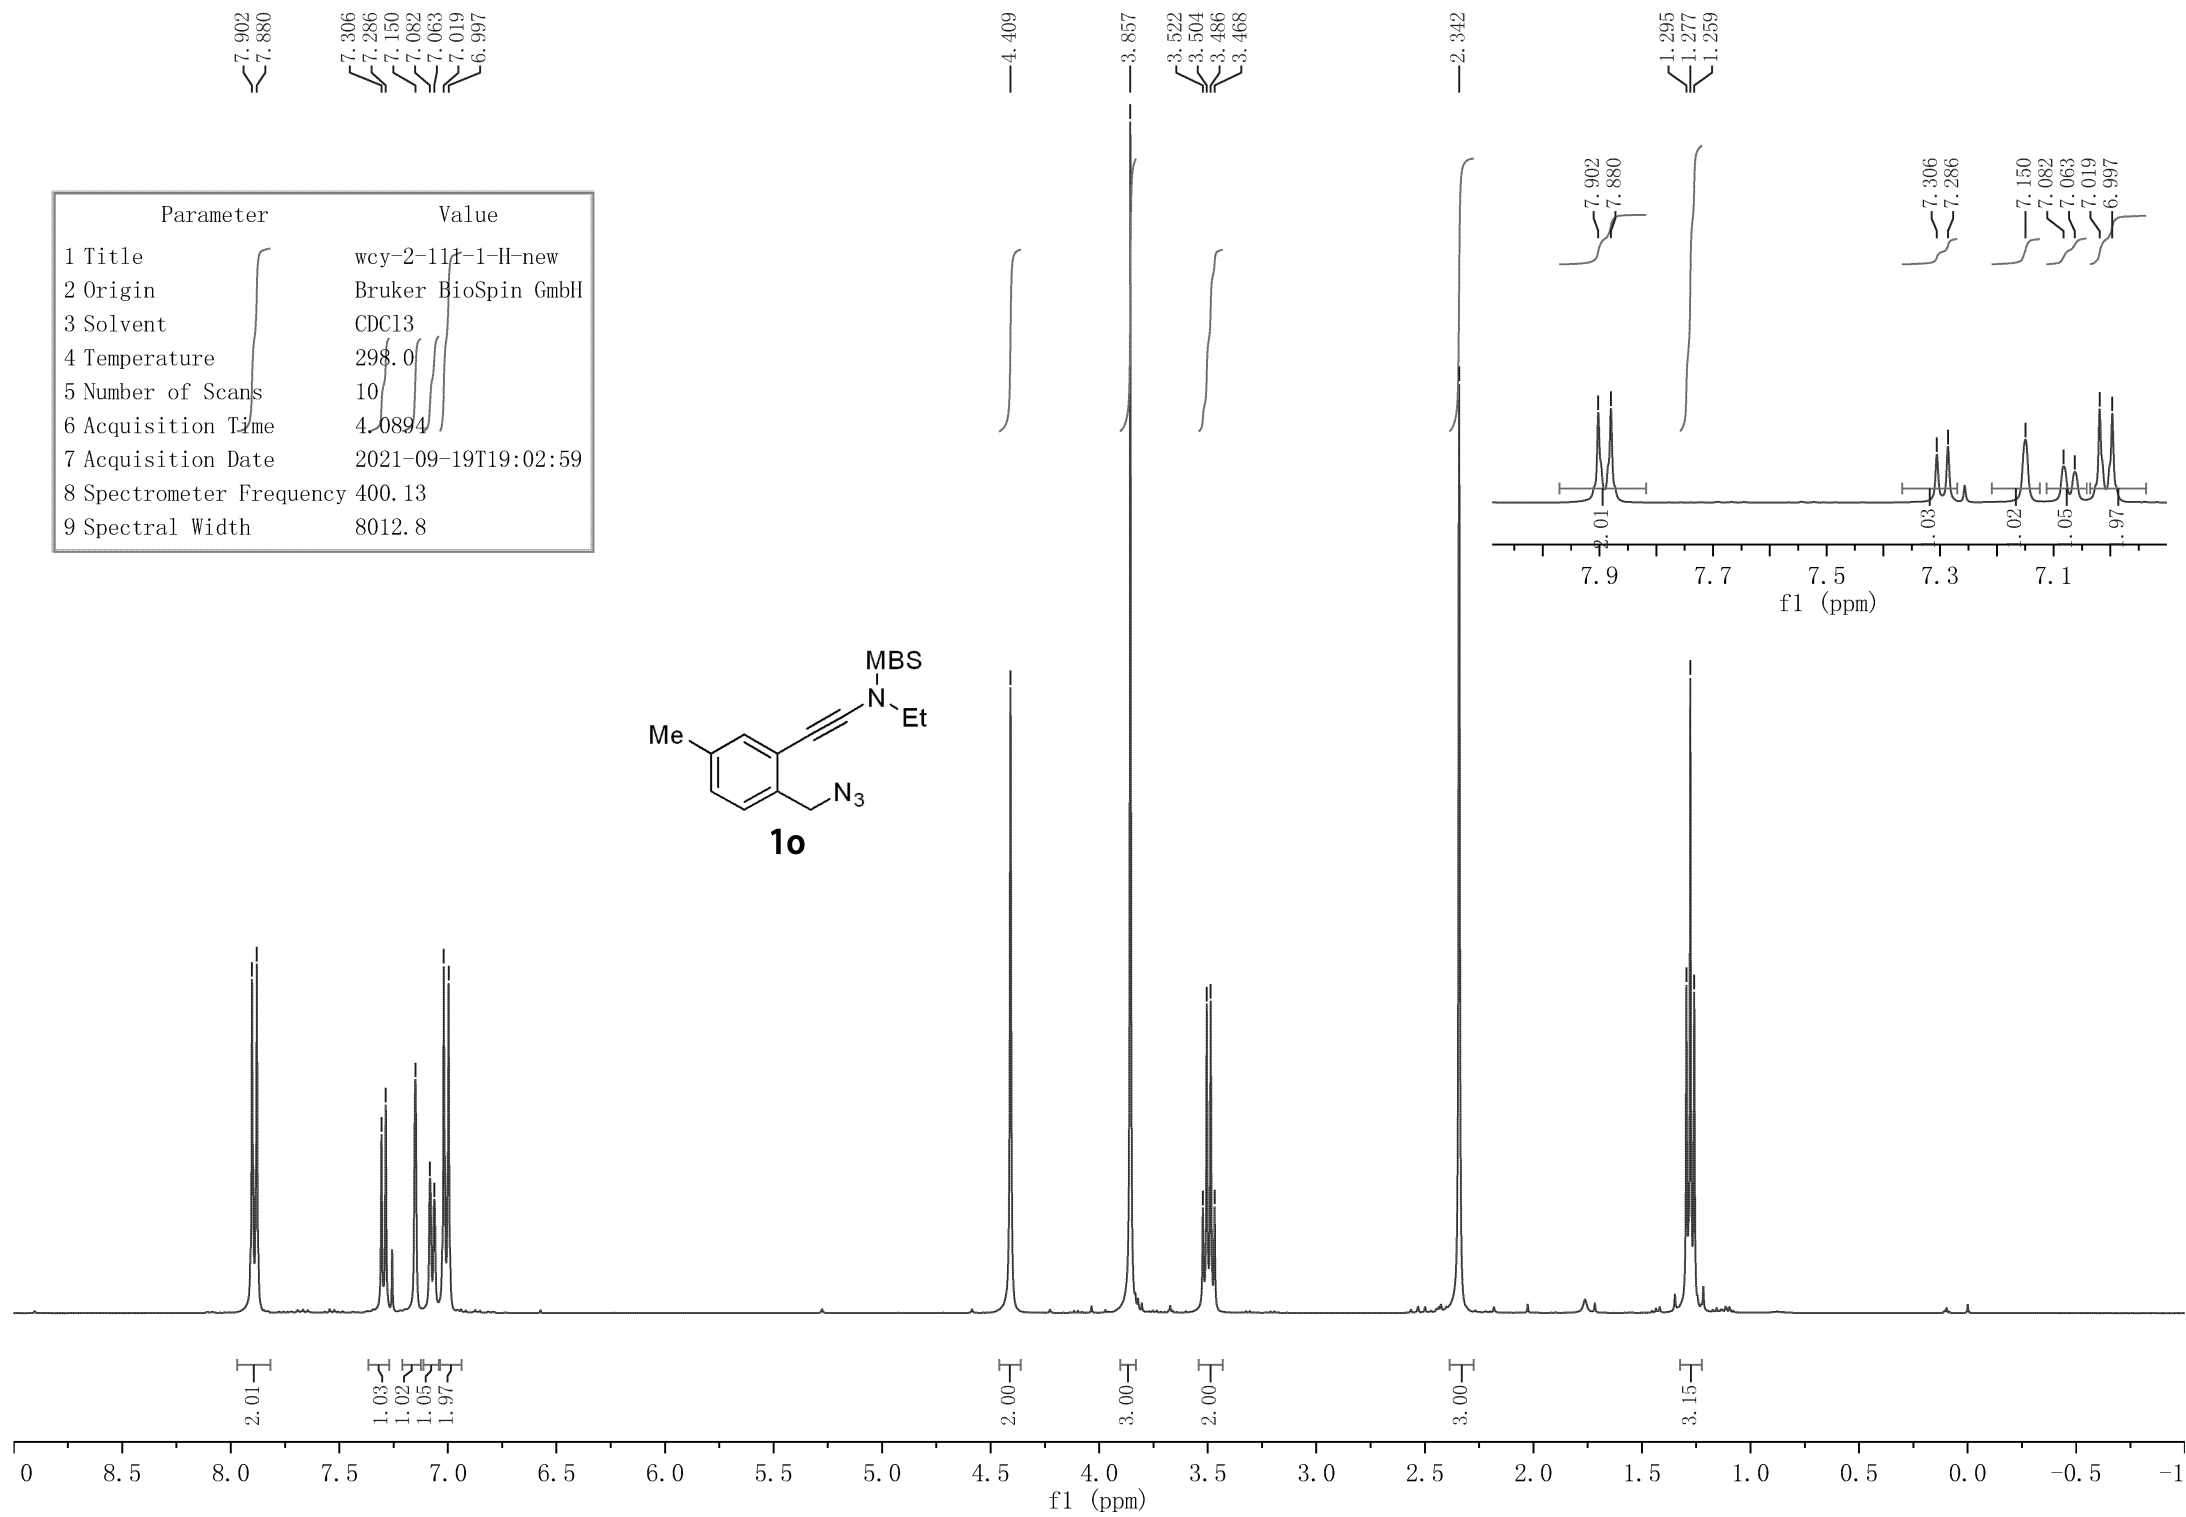

| Parameter                | Value               |
|--------------------------|---------------------|
| 1 Title                  | 5-Me-Sub-C          |
| 2 Origin                 | Bruker BioSpin GmbH |
| 3 Solvent                | CDCl3               |
| 4 Temperature            | 300.0               |
| 5 Number of Scans        | 12                  |
| 6 Acquisition Time       | 1.3631              |
| 7 Acquisition Date       | 2021-09-19T16:58:45 |
| 8 Spectrometer Frequency | 100.61              |
| 9 Spectral Width         | 24038.5             |

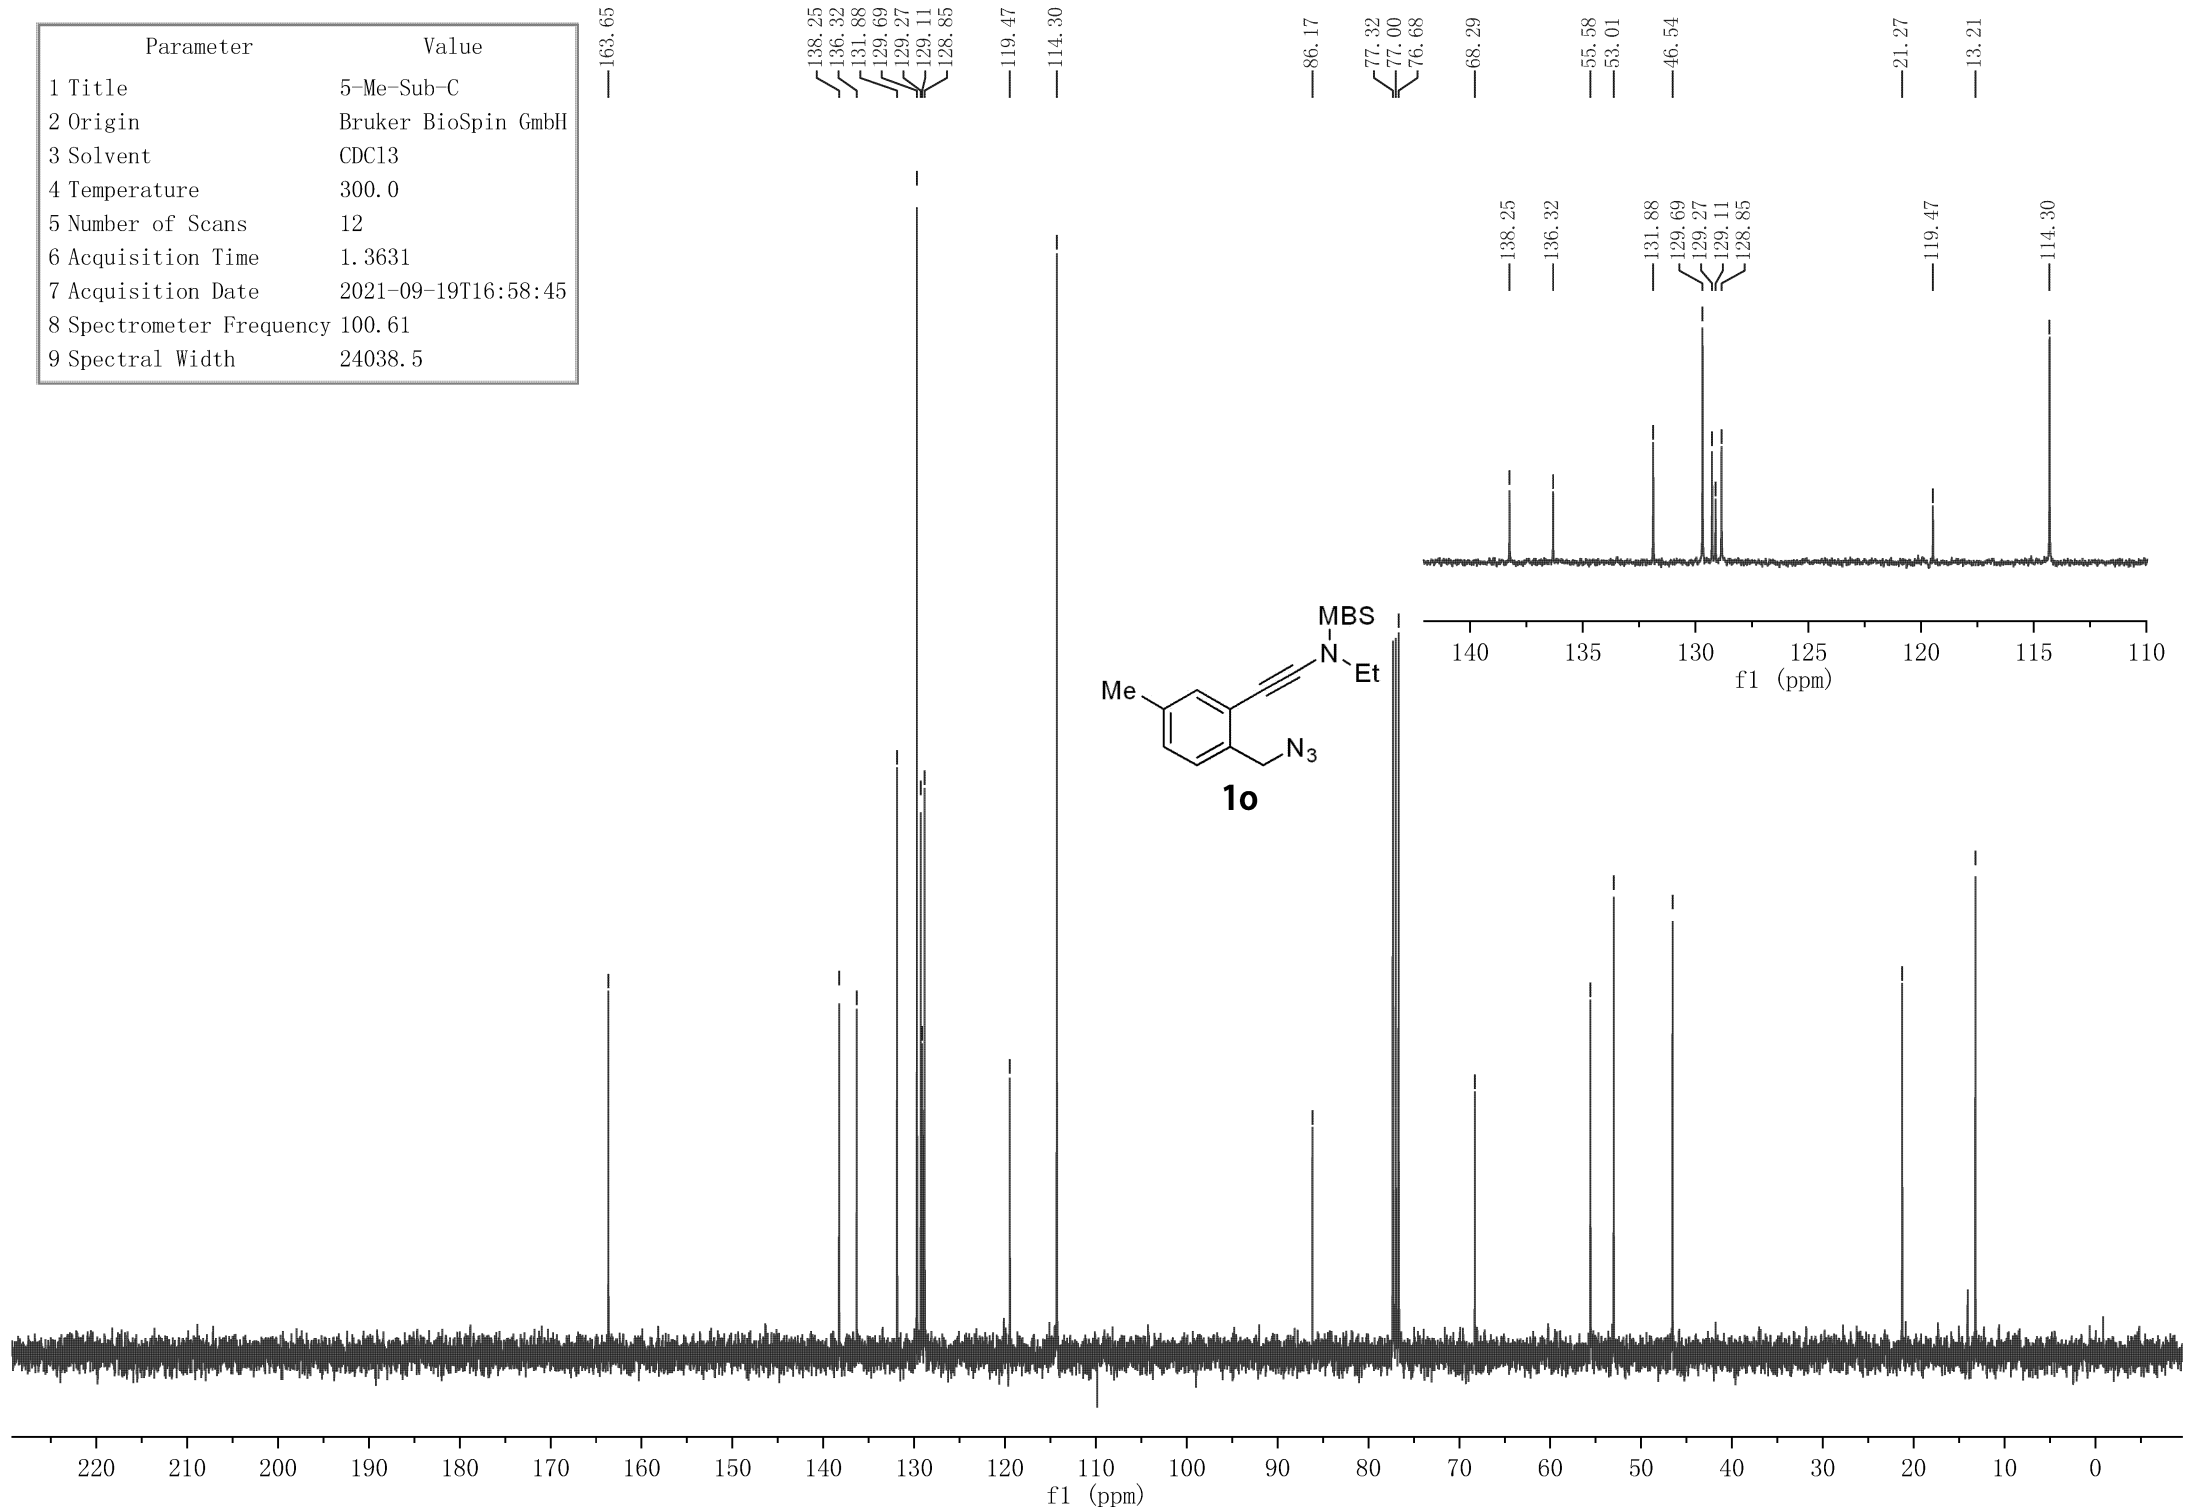



| Parameter                | Value               |
|--------------------------|---------------------|
| 1 Title                  | 5-MeO-H-Sub         |
| 2 Origin                 | Bruker BioSpin GmbH |
| 3 Solvent                | CDC13               |
| 4 Temperature            | 298.0               |
| 5 Number of Scans        | 12                  |
| 6 Acquisition Time       | 4.0894              |
| 7 Acquisition Date       | 2021-09-07T17:00:30 |
| 8 Spectrometer Frequency | 400.13              |
| 9 Spectral Width         | 8012.8              |

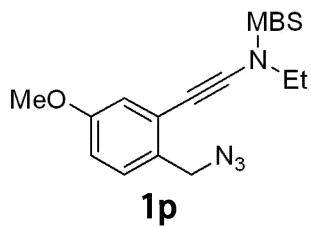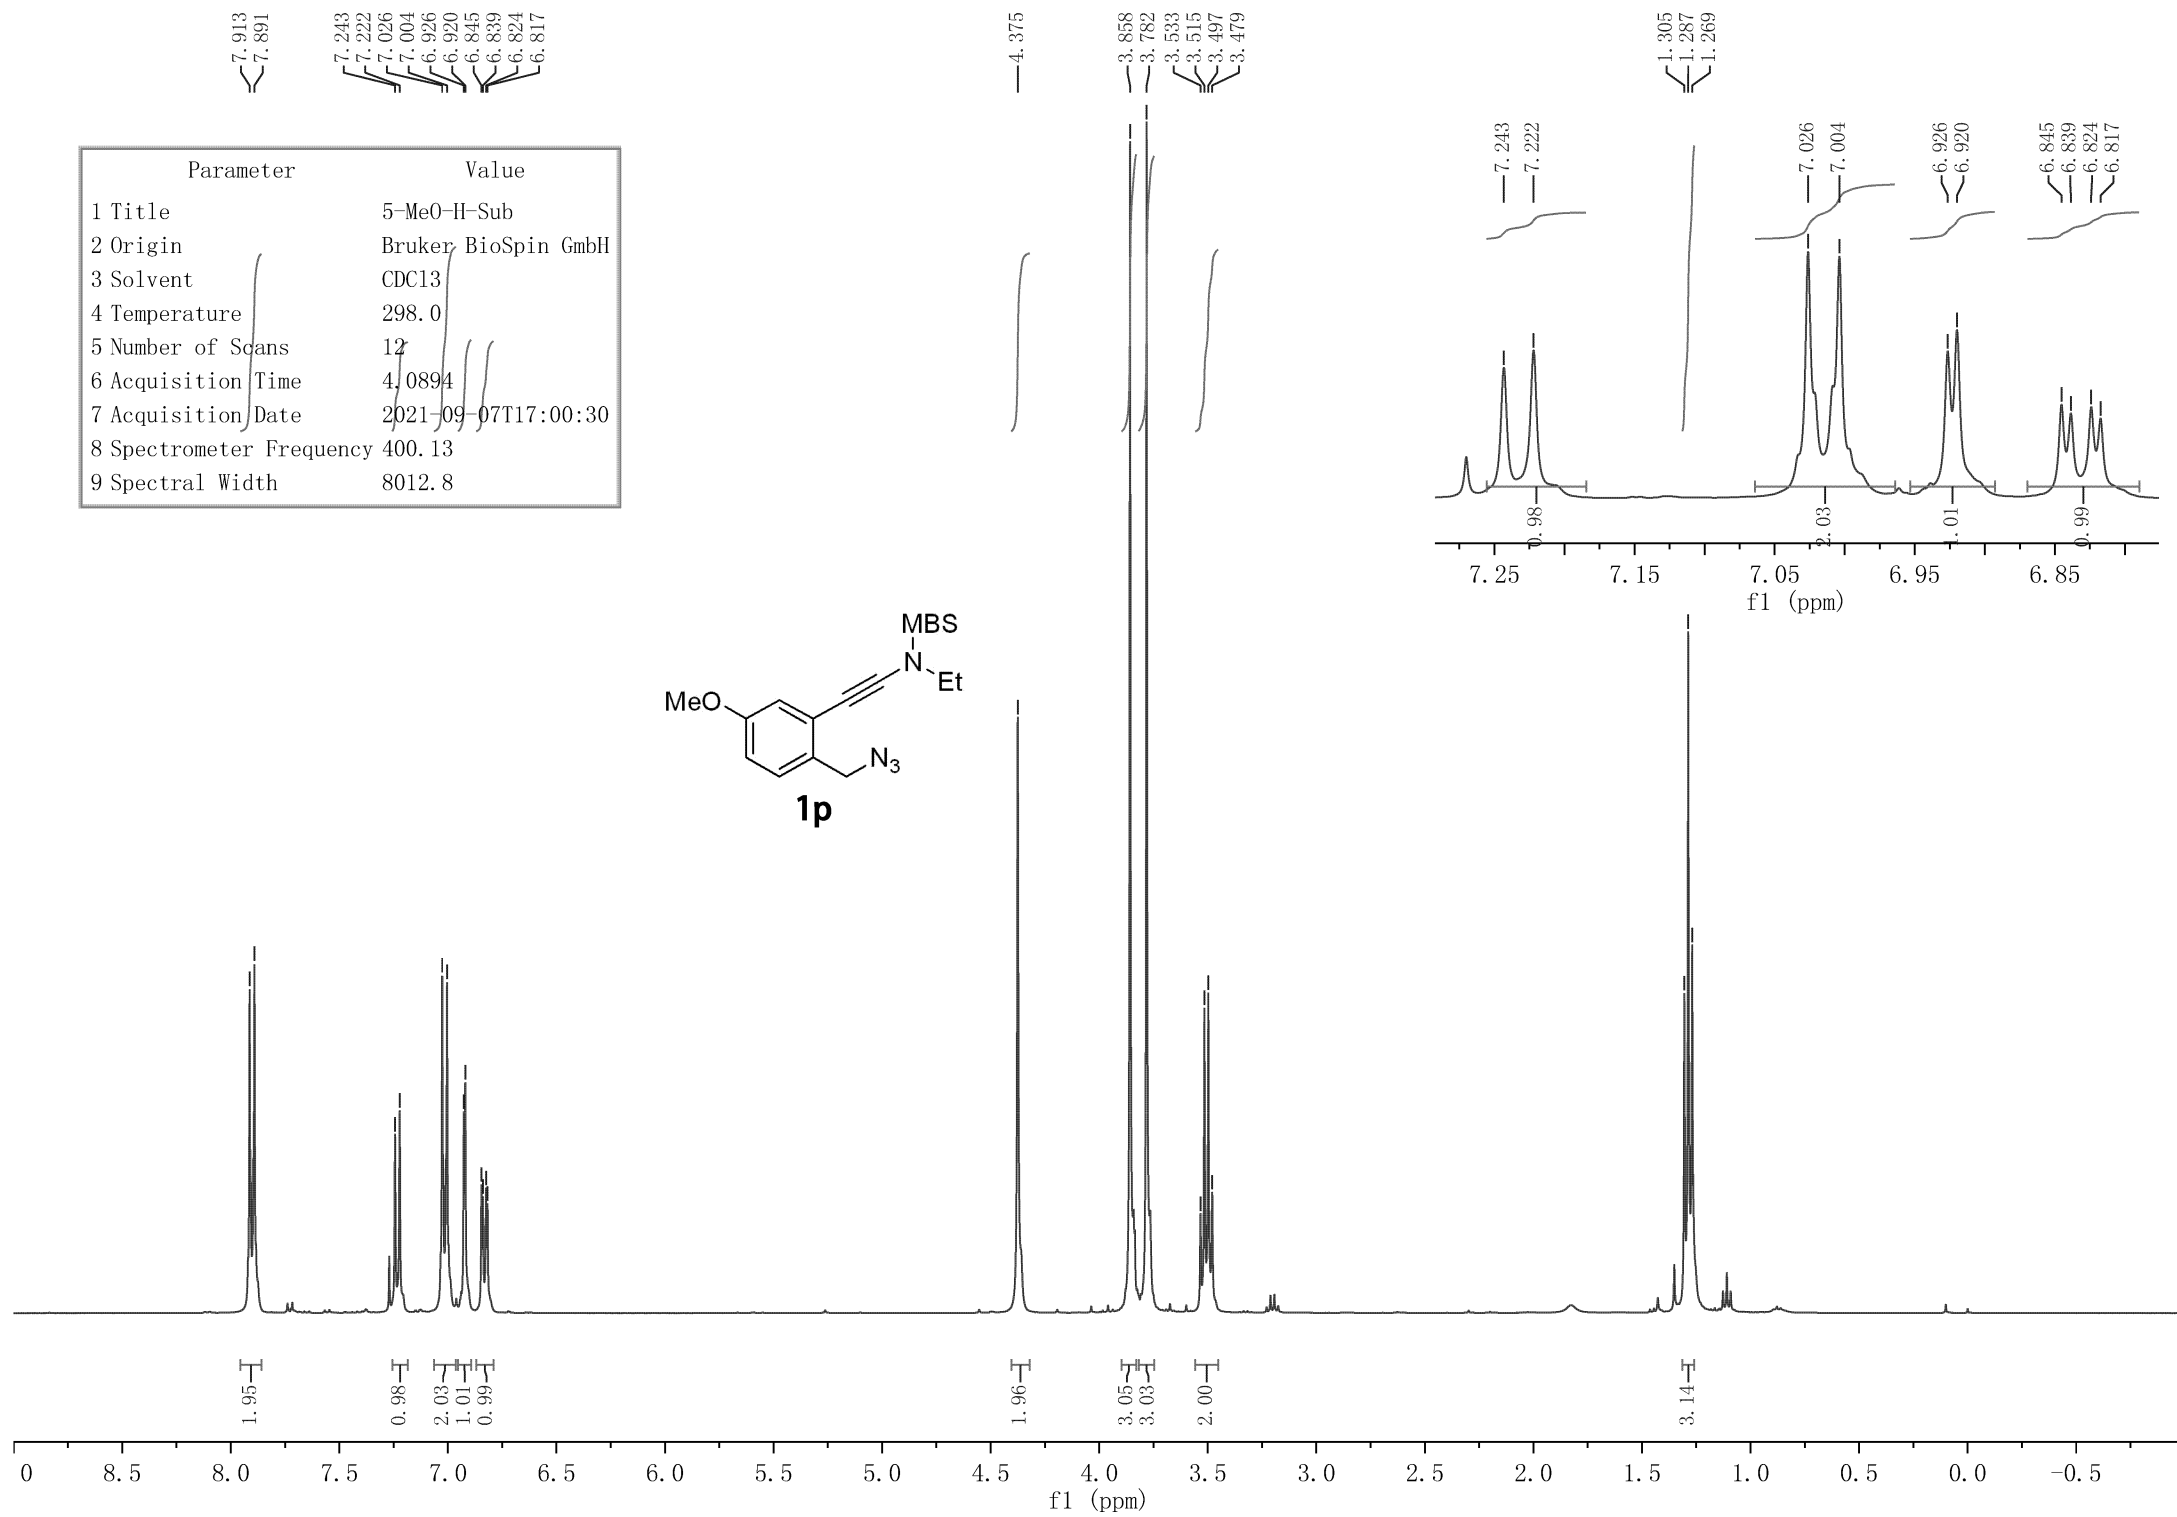

| Parameter                | Value               |
|--------------------------|---------------------|
| 1 Title                  | 5-MeO-C-Sub         |
| 2 Origin                 | Bruker BioSpin GmbH |
| 3 Solvent                | CDC13               |
| 4 Temperature            | 300.0               |
| 5 Number of Scans        | 18                  |
| 6 Acquisition Time       | 1.3631              |
| 7 Acquisition Date       | 2021-09-07T17:04:06 |
| 8 Spectrometer Frequency | 100.61              |
| 9 Spectral Width         | 24038.5             |

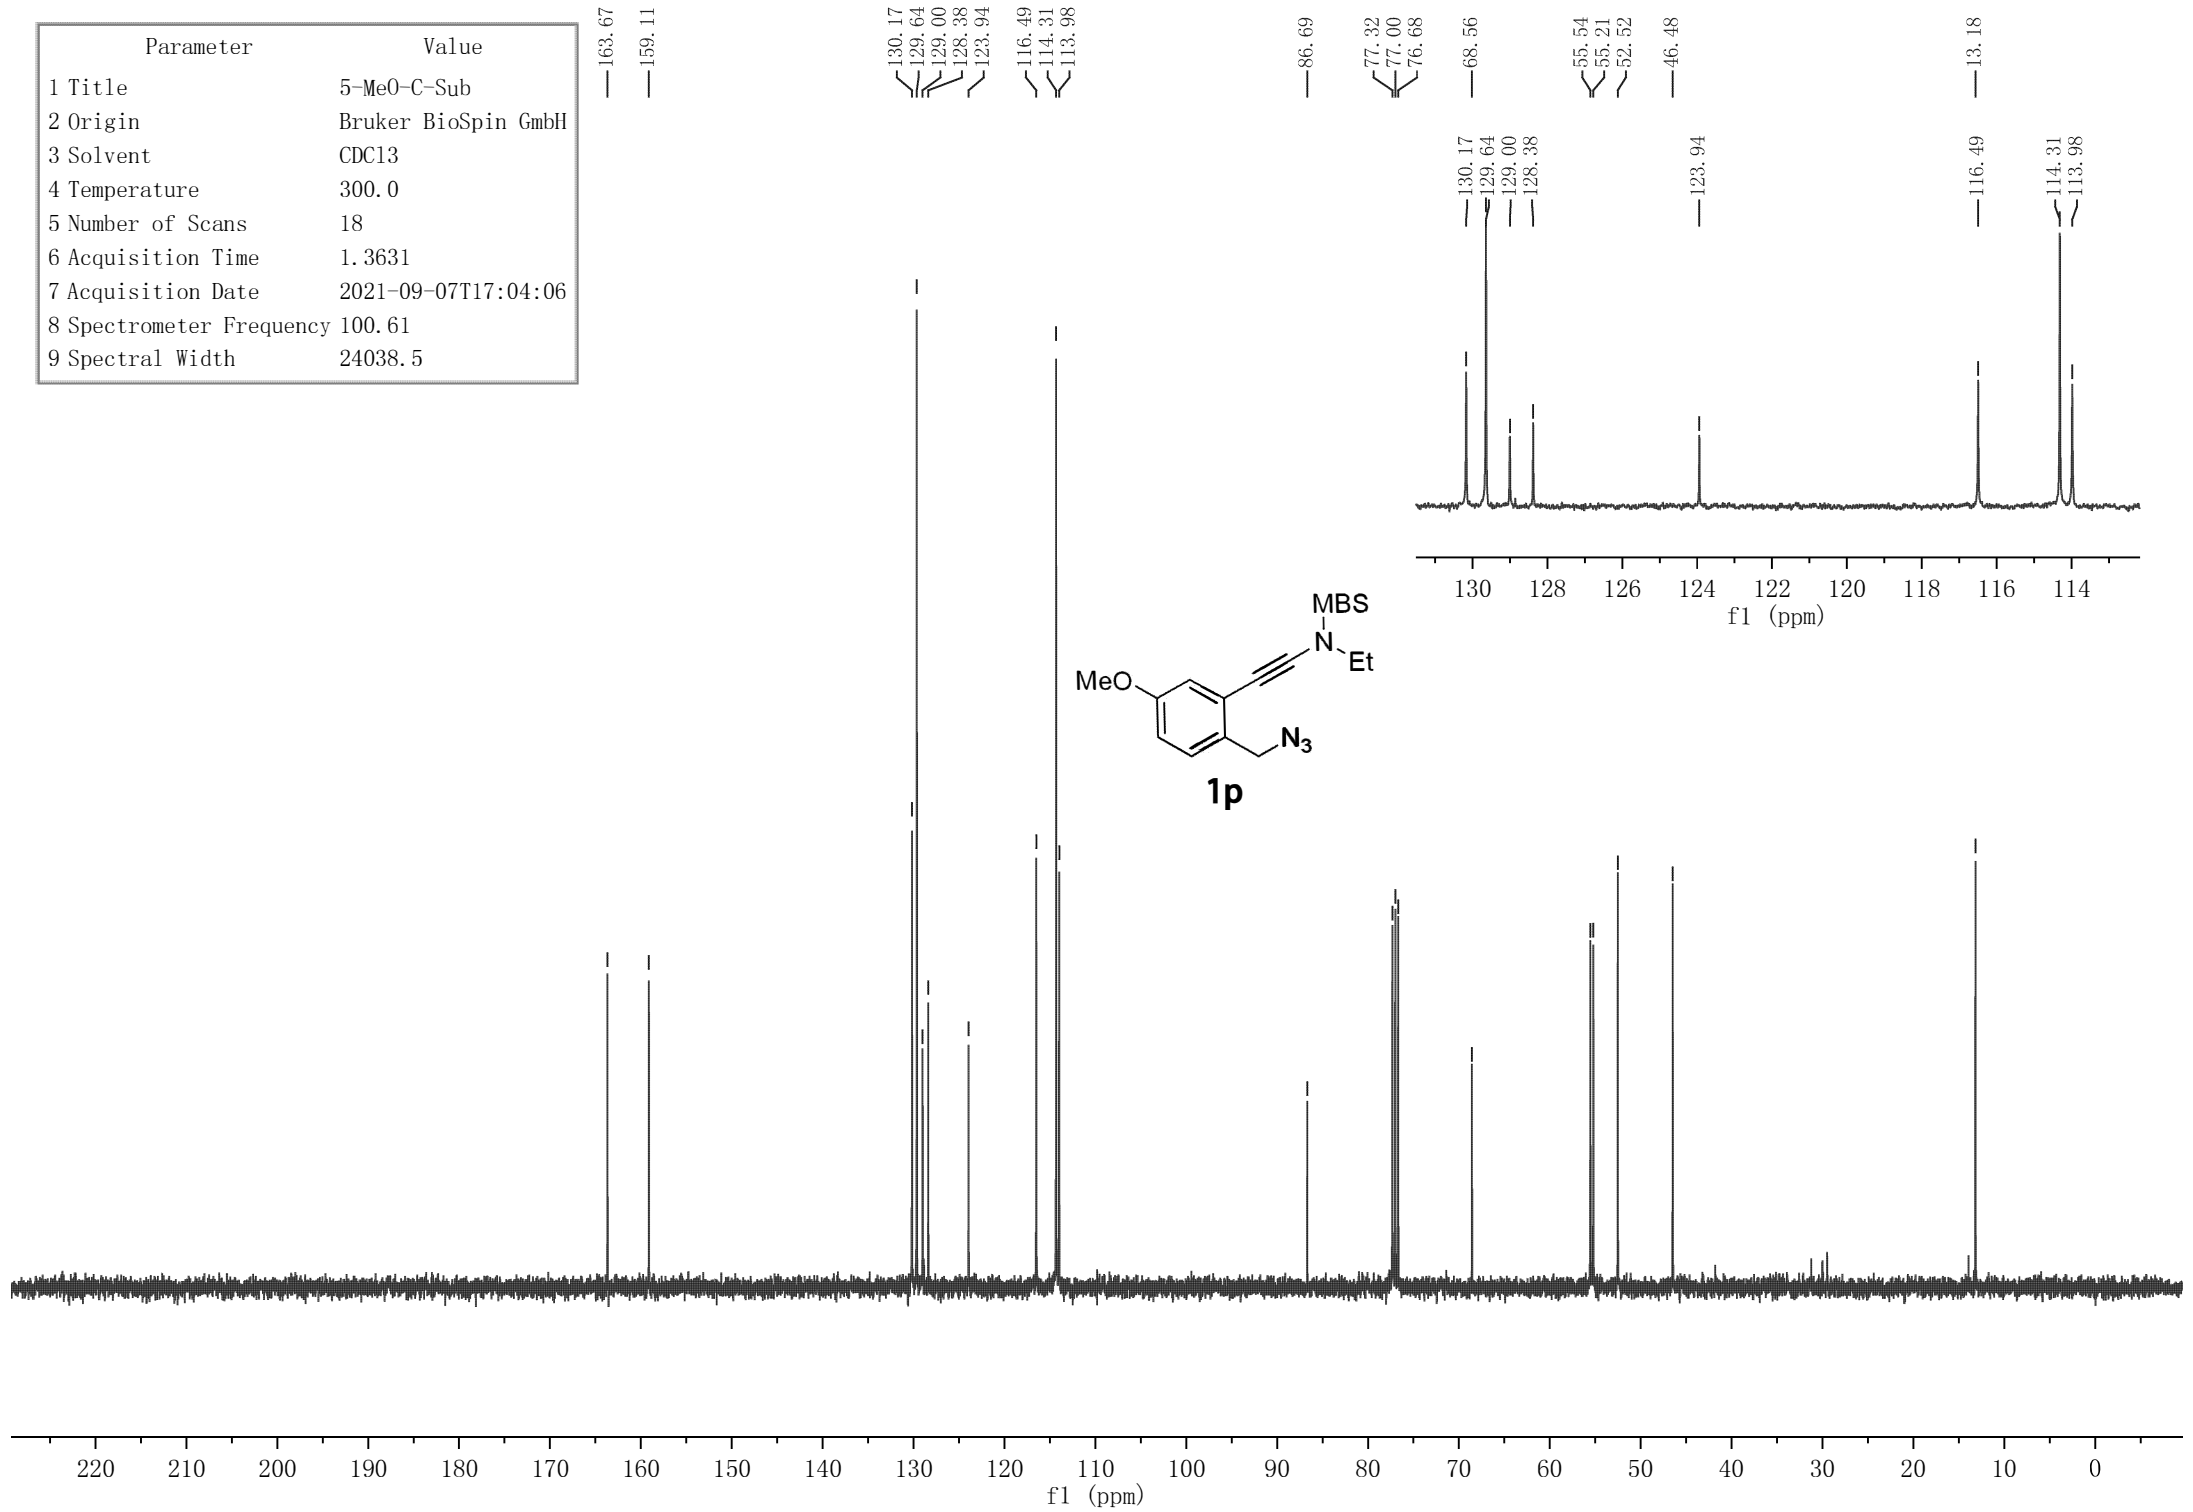

| Parameter                | Value               |
|--------------------------|---------------------|
| 1 Title                  | zgy-9-83-2          |
| 2 Origin                 |                     |
| 3 Solvent                | CDC13               |
| 4 Temperature            | 296.5               |
| 5 Number of Scans        | 16                  |
| 6 Acquisition Time       | 4.0002              |
| 7 Acquisition Date       | 2022-01-11T11:33:18 |
| 8 Spectrometer Frequency | 399.93              |
| 9 Spectral Width         | 8012.0              |

7.497  
7.475  
7.124  
7.117  
7.107  
7.068  
7.059  
6.732  
6.710

4.559  
4.129  
3.748  
3.712  
3.696  
3.679  
3.665  
3.648  
3.285  
3.255  
3.235  
3.065  
3.036  
2.936  
2.823  
2.805  
2.792  
2.775  
2.699  
2.624  
1.984  
1.974  
1.954  
1.940  
1.917

1.250  
1.232  
1.214

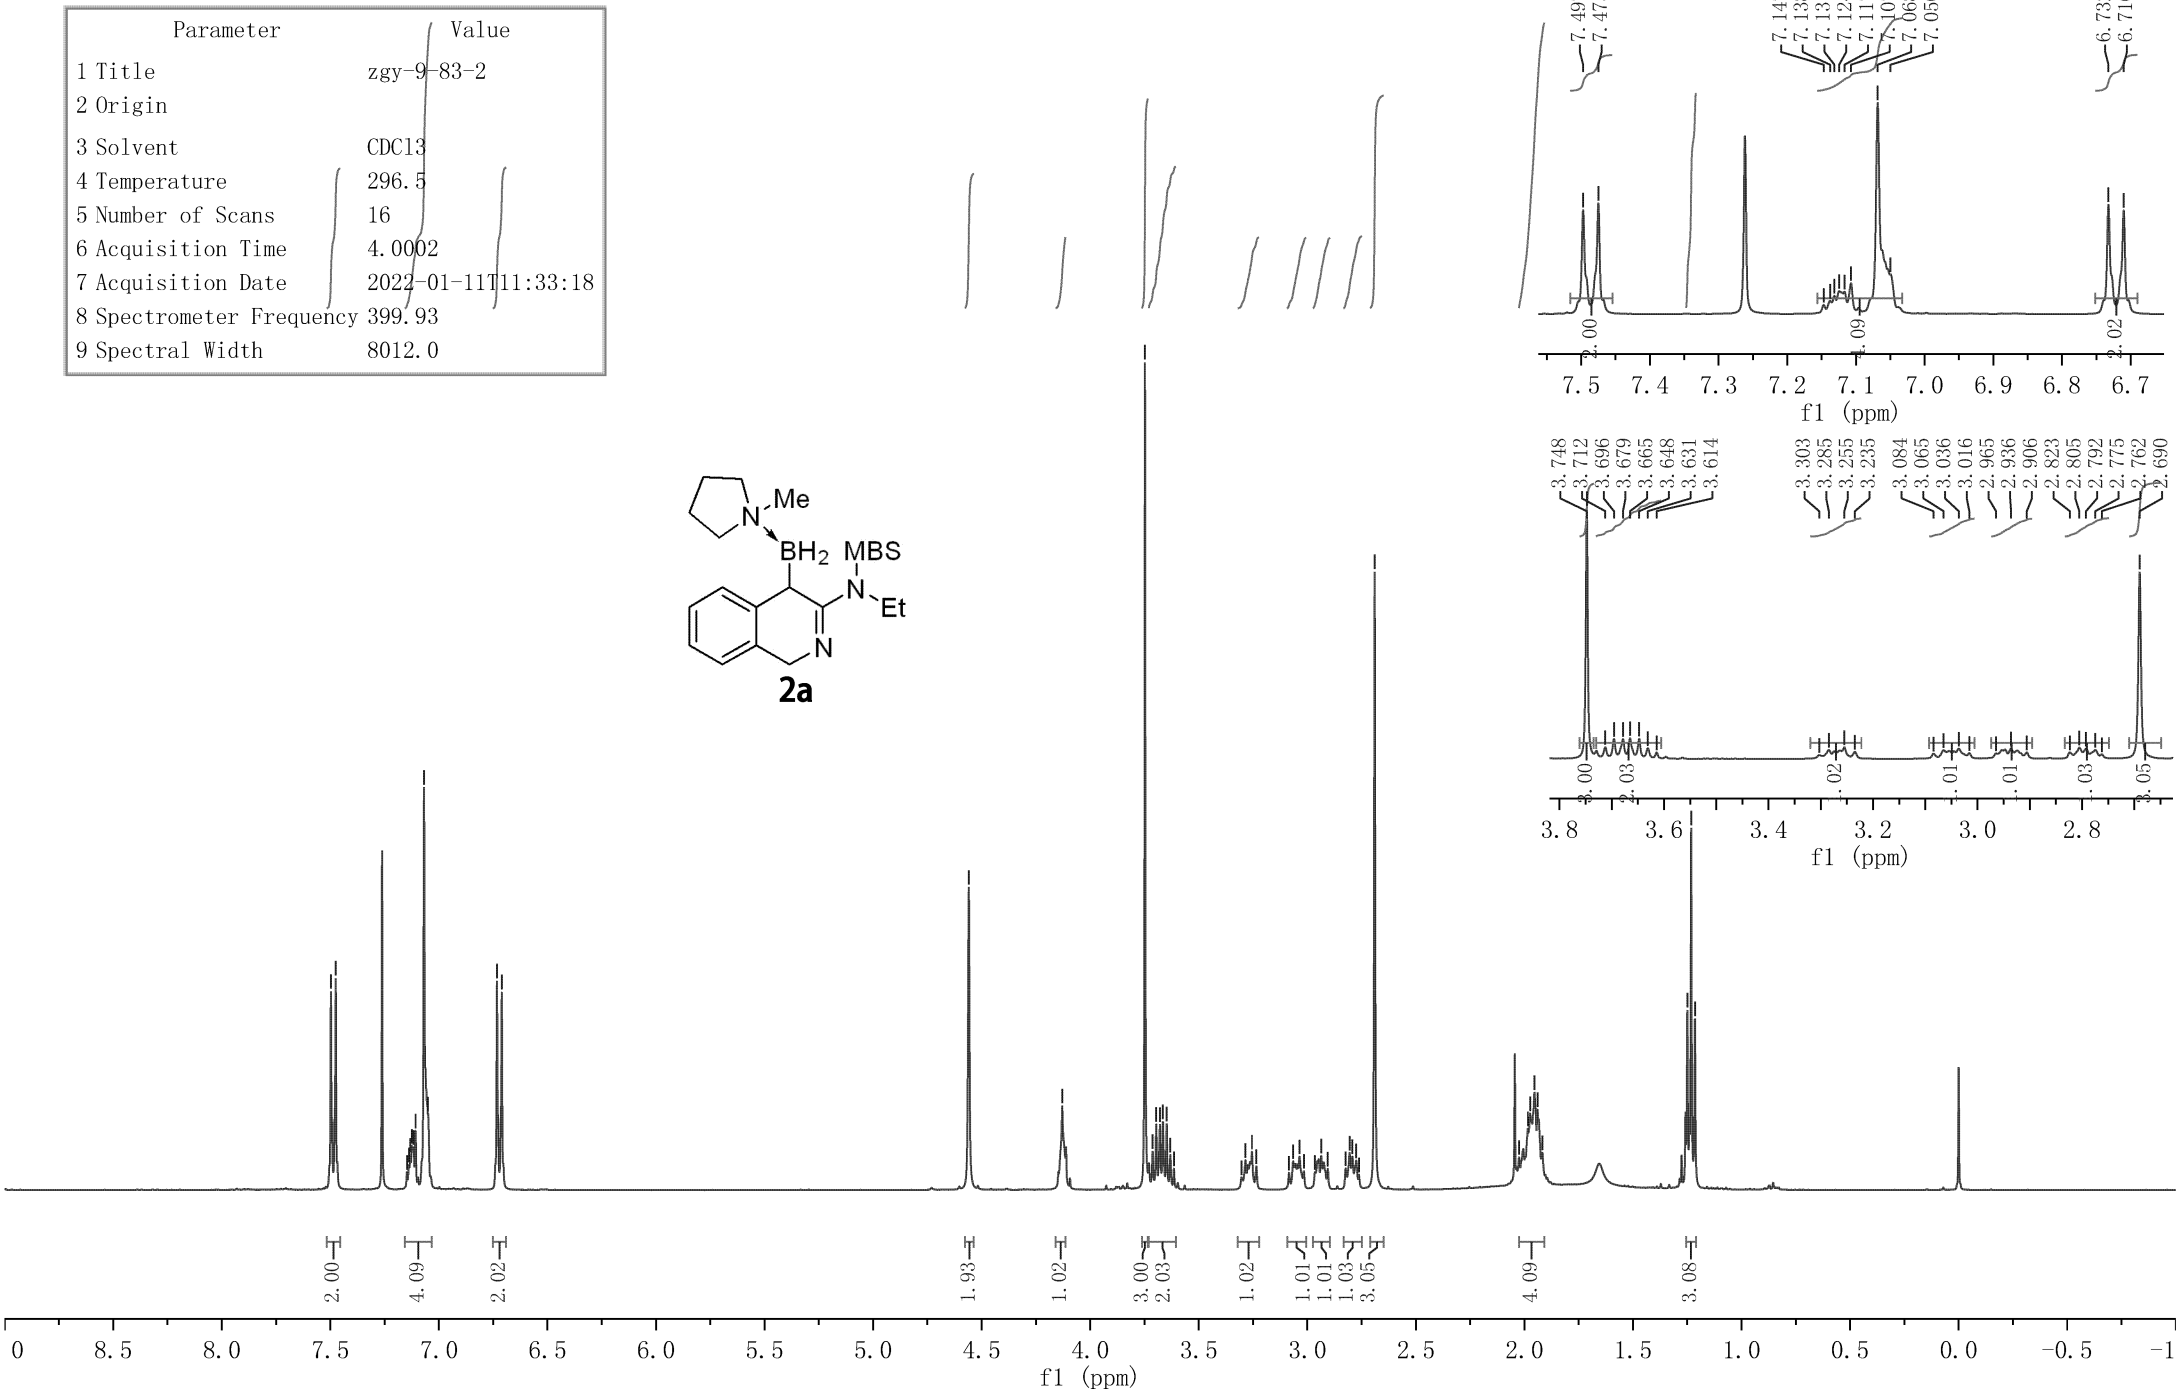

| Parameter                | Value               |
|--------------------------|---------------------|
| 1 Title                  | MbsEt-Pro-C         |
| 2 Origin                 | Bruker BioSpin GmbH |
| 3 Solvent                | CDC13               |
| 4 Temperature            | 300.0               |
| 5 Number of Scans        | 22                  |
| 6 Acquisition Time       | 1.3631              |
| 7 Acquisition Date       | 2021-09-14T21:54:50 |
| 8 Spectrometer Frequency | 100.61              |
| 9 Spectral Width         | 24038.5             |

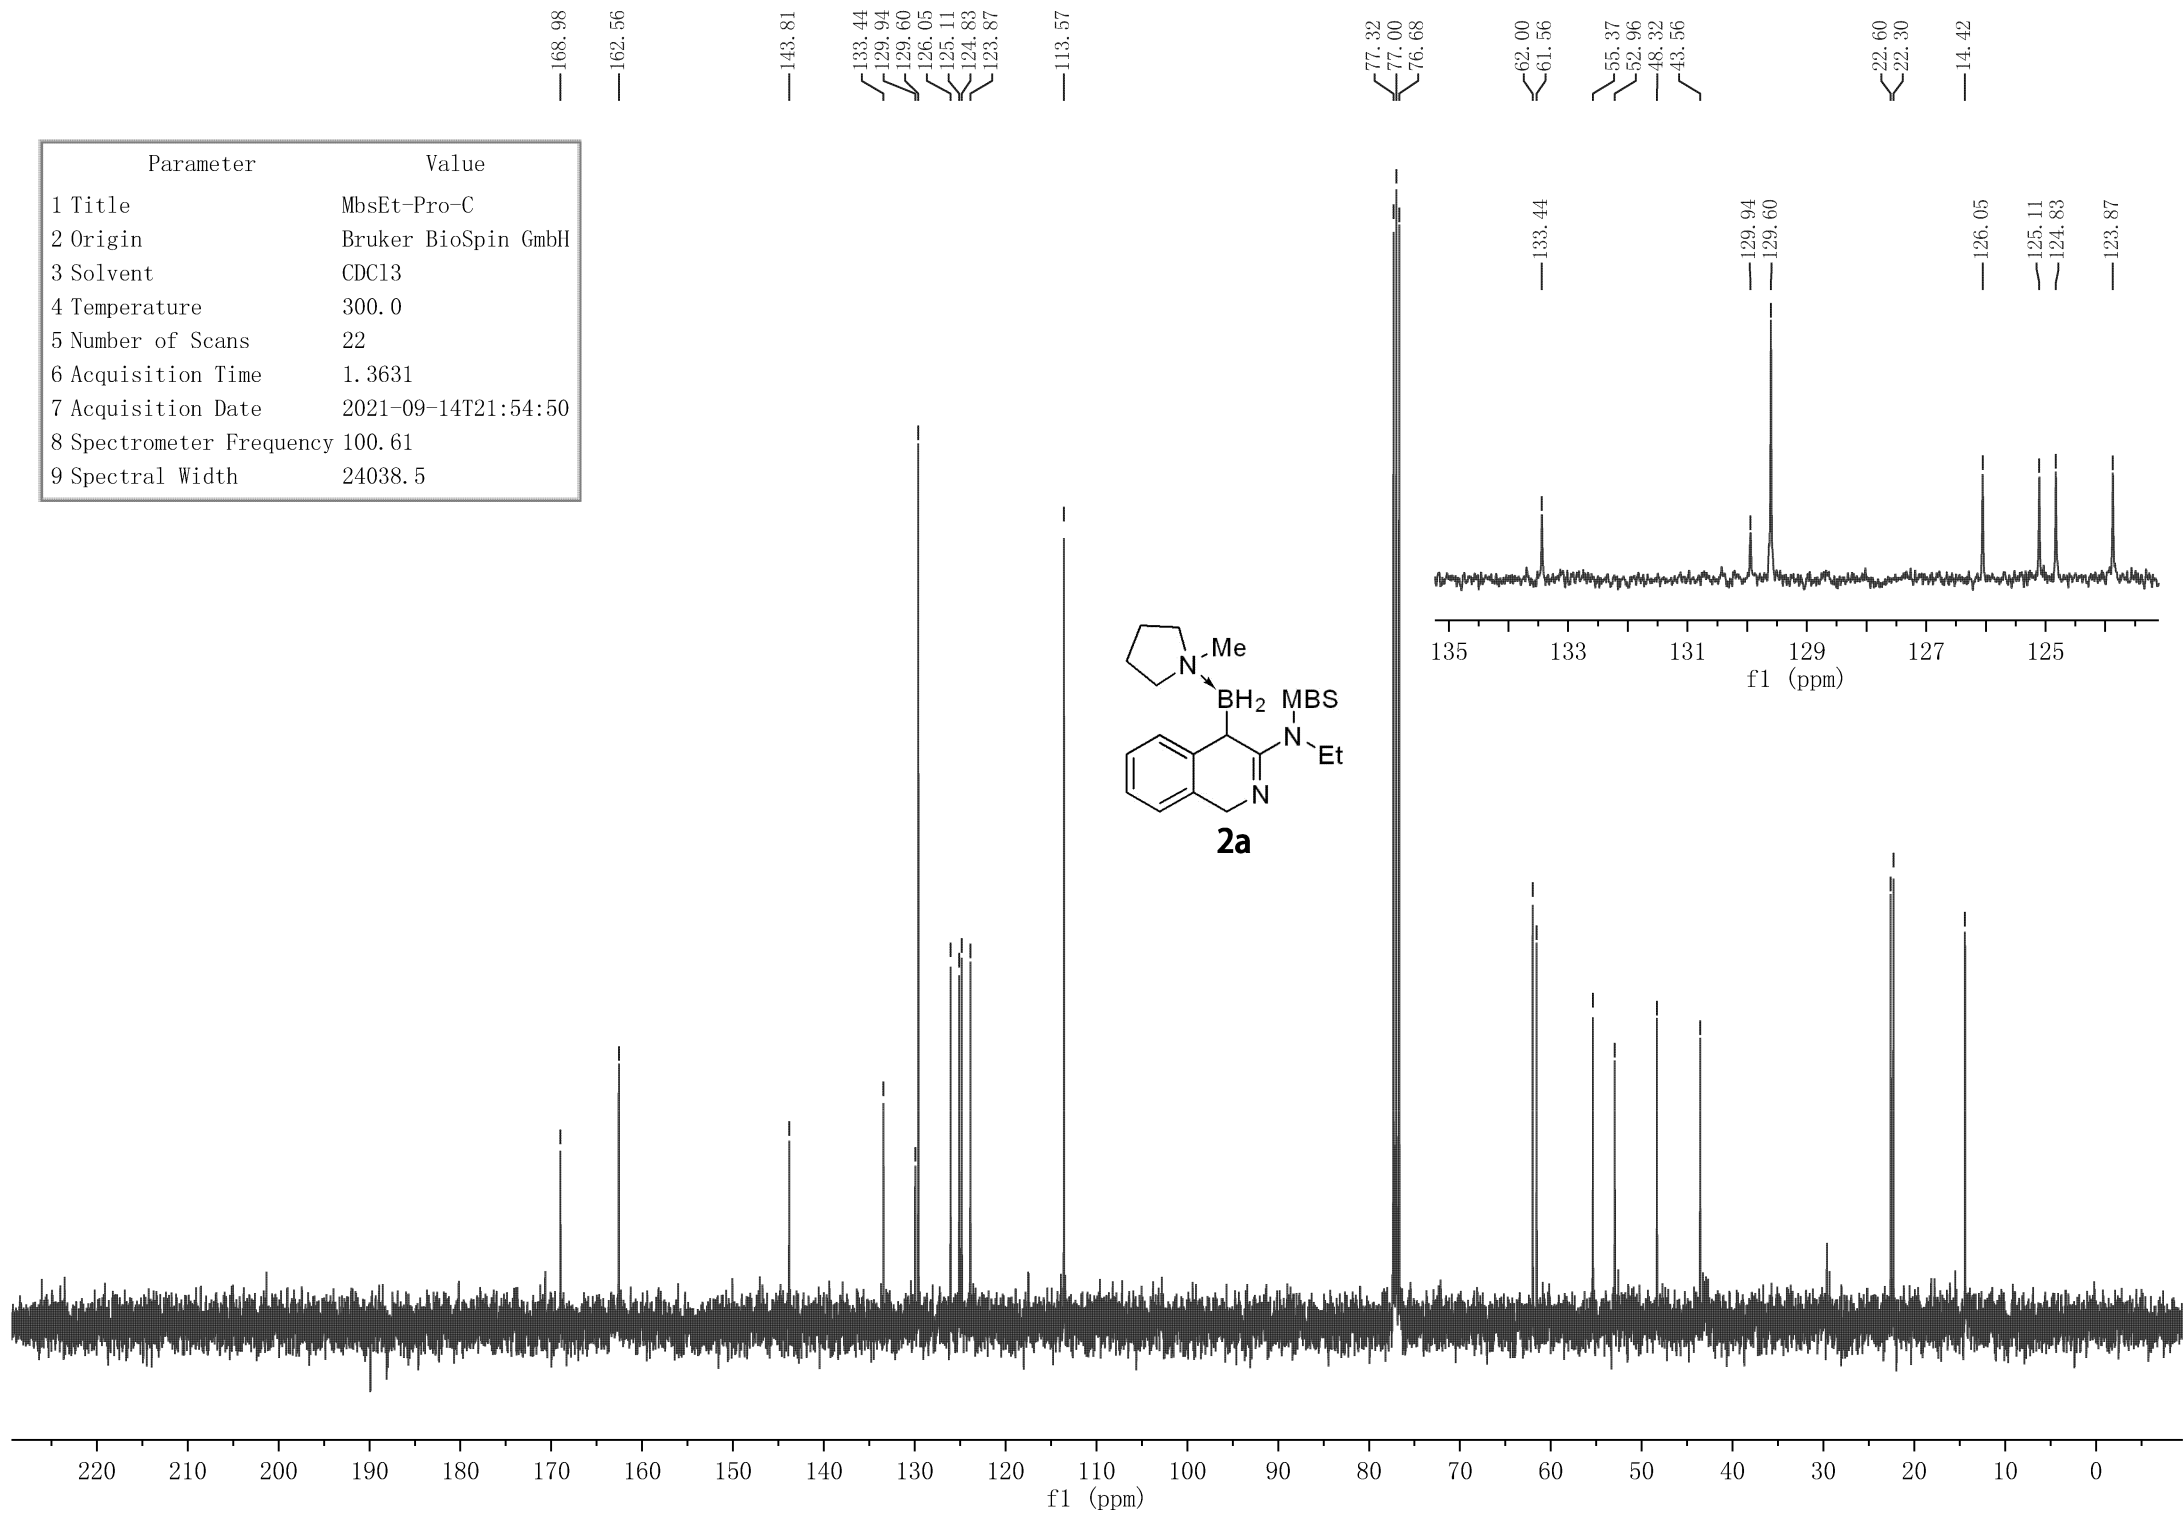

| Parameter                | Value               |
|--------------------------|---------------------|
| 1 Title                  | wcy-3-77-dept       |
| 2 Origin                 | Bruker BioSpin GmbH |
| 3 Solvent                | Acetone             |
| 4 Temperature            | 300.0               |
| 5 Number of Scans        | 39                  |
| 6 Acquisition Time       | 1.3631              |
| 7 Acquisition Date       | 2021-11-24T13:13:08 |
| 8 Spectrometer Frequency | 100.61              |
| 9 Spectral Width         | 24038.5             |

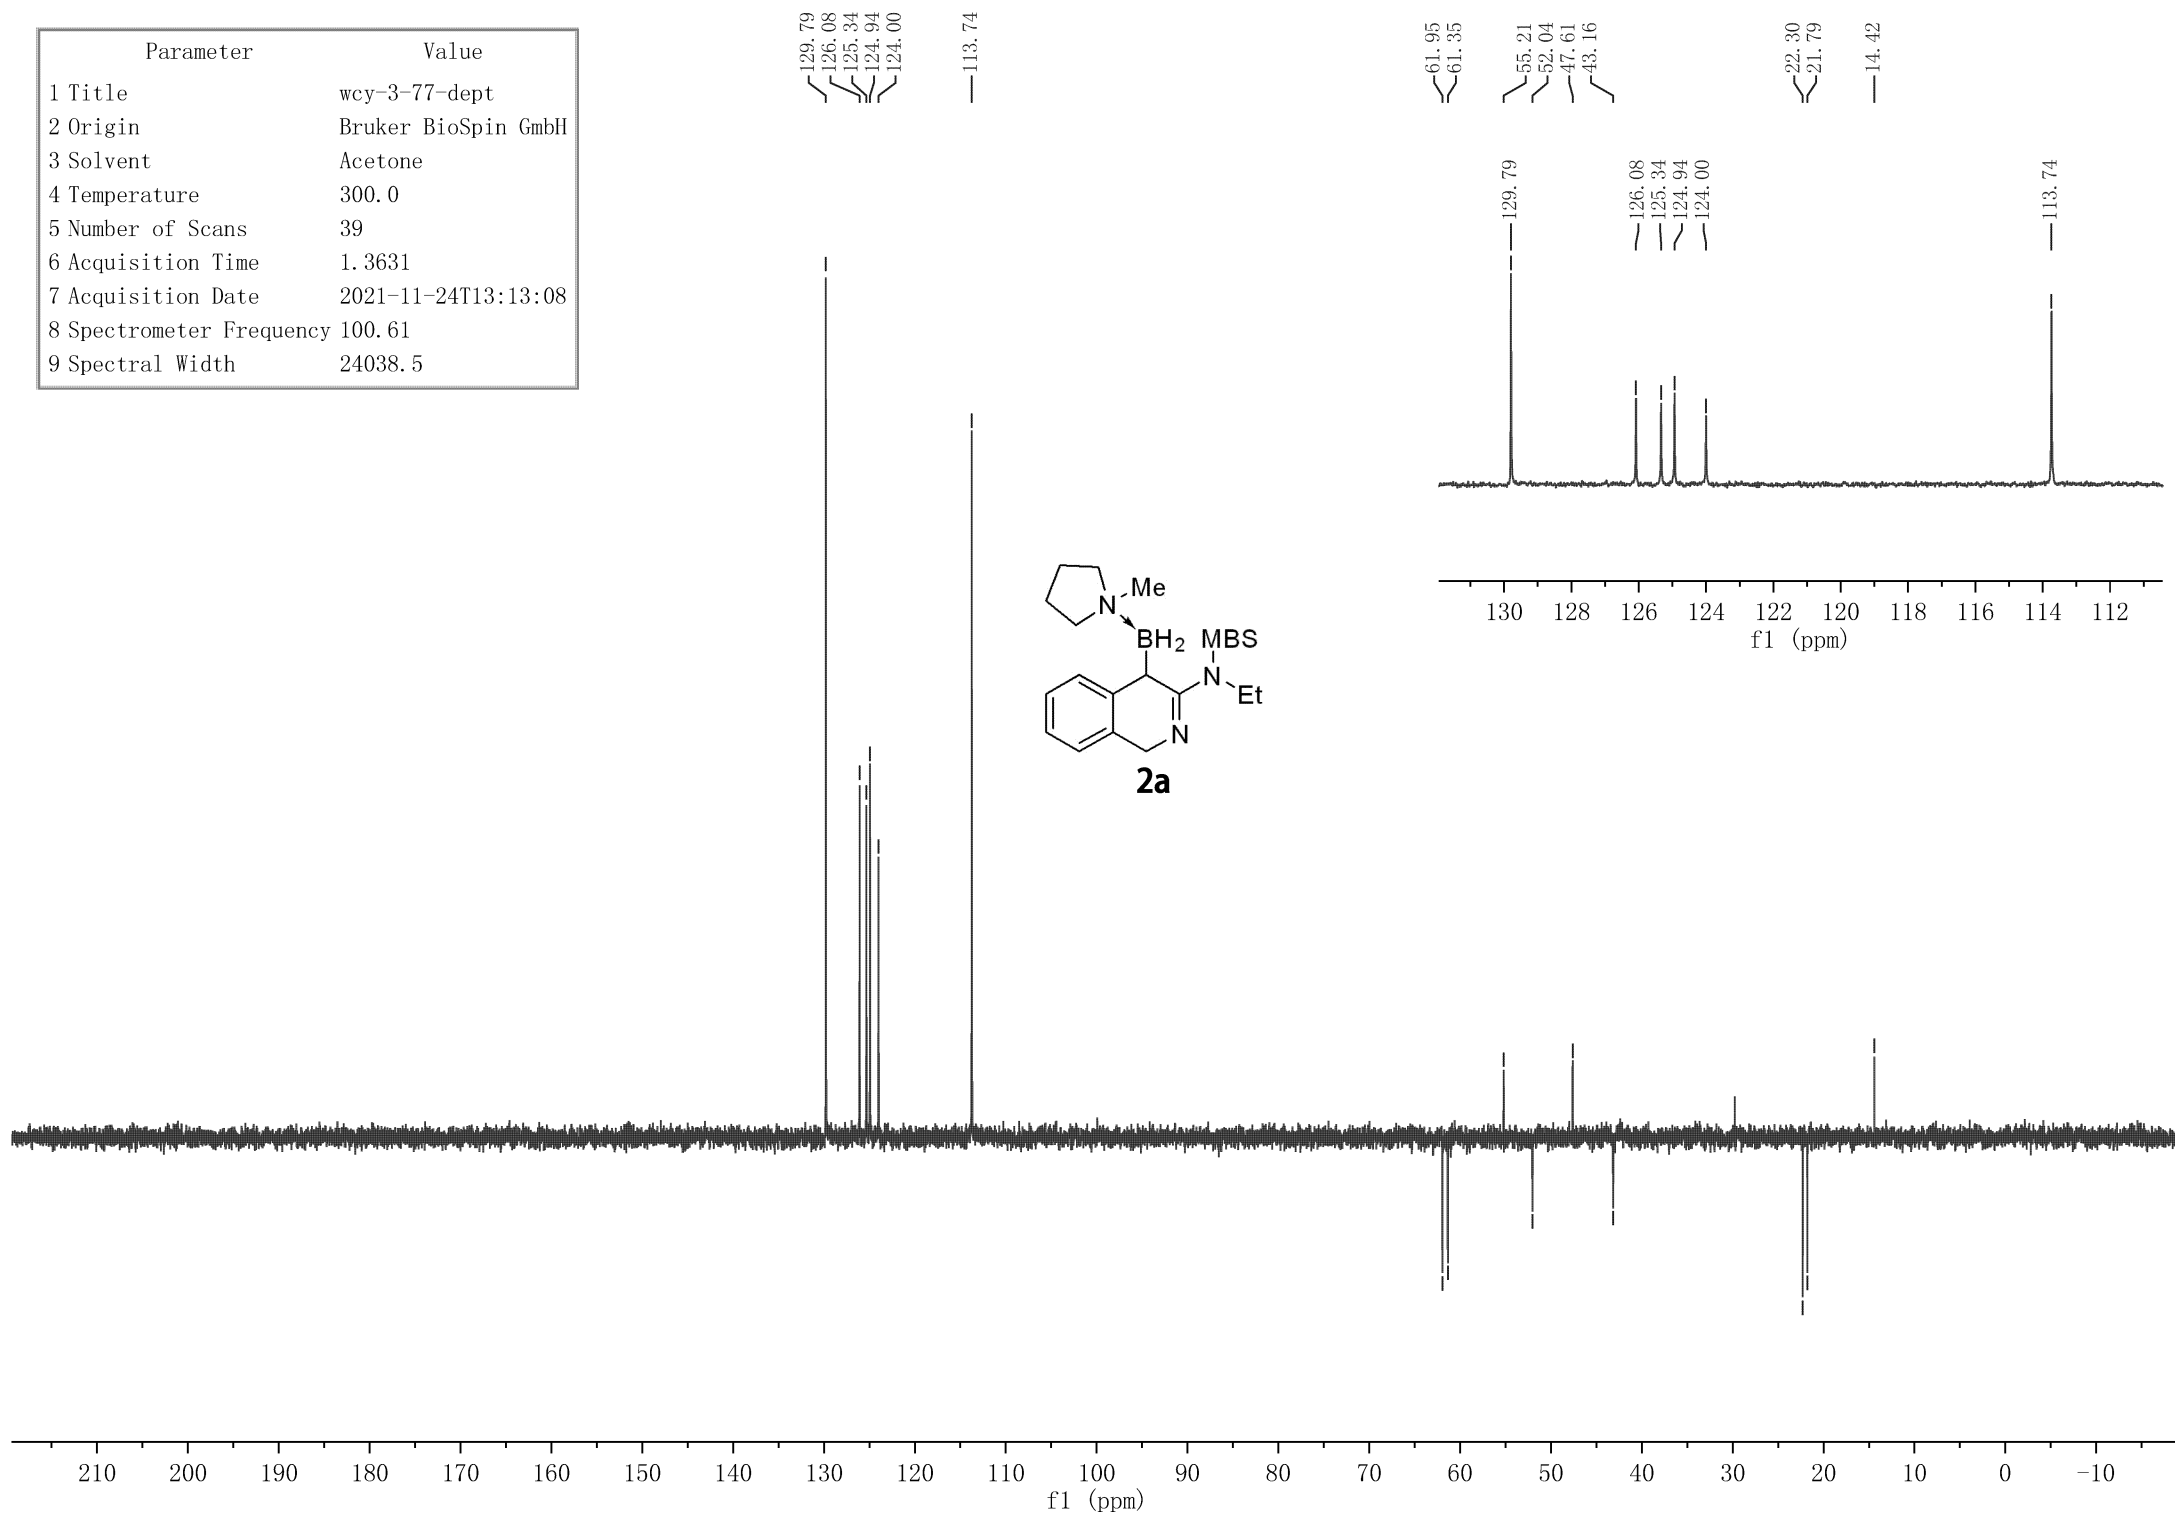

7.449  
7.428  
7.138  
7.129  
7.123  
7.116  
7.108  
7.099  
7.061  
7.039

4.557  
4.126  
3.736  
3.720  
3.702  
3.677  
3.659  
3.643  
3.254  
3.224  
3.022  
2.993  
2.924  
2.917  
2.906  
2.768  
2.755  
2.737  
2.653  
2.274  
1.989  
1.939  
1.924  
1.908  
1.884  
1.254  
1.236  
1.218

| Parameter                | Value               |
|--------------------------|---------------------|
| 1 Title                  | TsEt-Pro-1H         |
| 2 Origin                 | Bruker BioSpin GmbH |
| 3 Solvent                | CDC13               |
| 4 Temperature            | 298.0               |
| 5 Number of Scans        | 5                   |
| 6 Acquisition Time       | 4.0894              |
| 7 Acquisition Date       | 2021-10-12T09:42:27 |
| 8 Spectrometer Frequency | 400.13              |
| 9 Spectral Width         | 8012.8              |

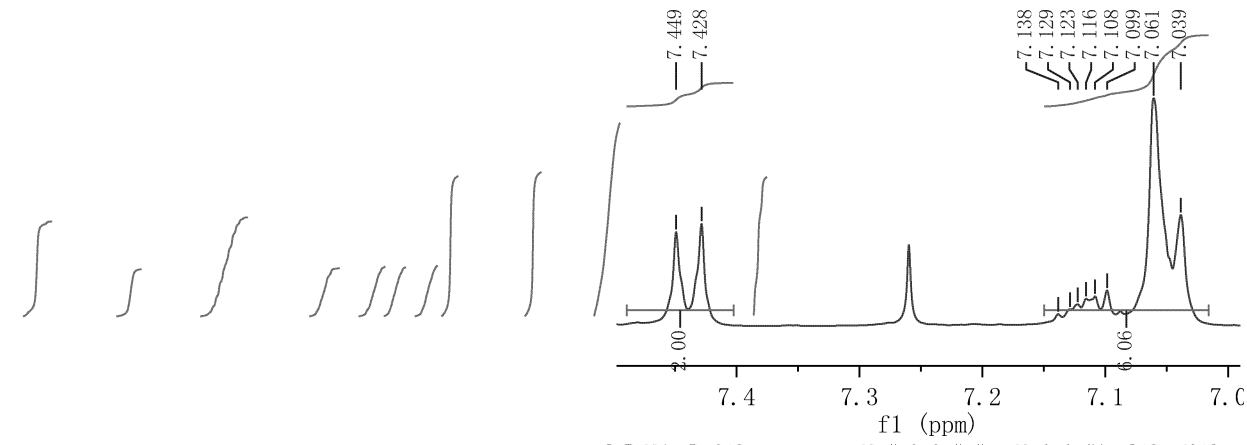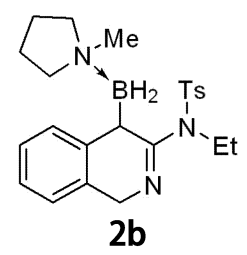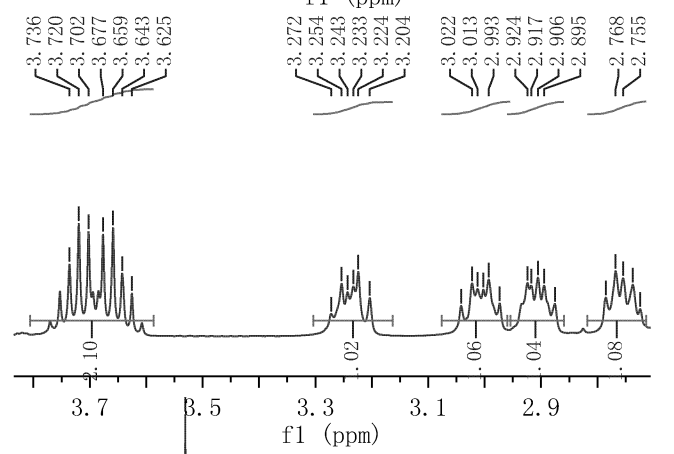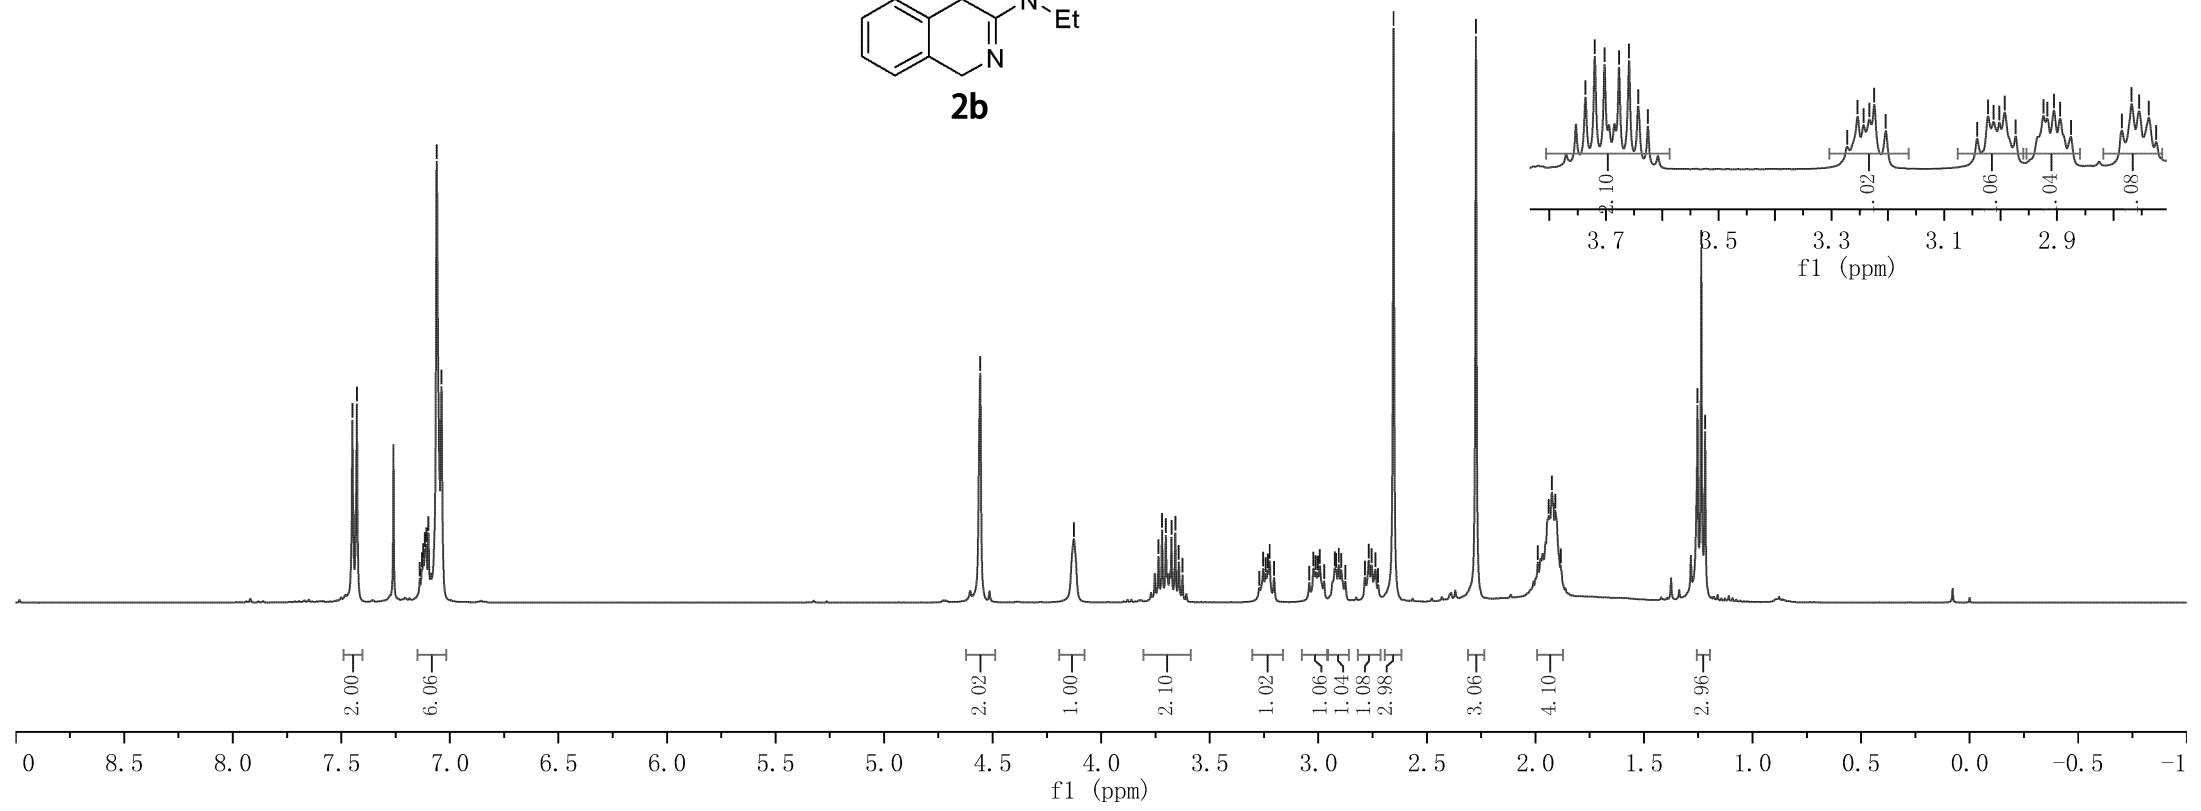

| Parameter                | Value               |
|--------------------------|---------------------|
| 1 Title                  | TsEt-Pro-C          |
| 2 Origin                 | Bruker BioSpin GmbH |
| 3 Solvent                | CDC13               |
| 4 Temperature            | 300.0               |
| 5 Number of Scans        | 30                  |
| 6 Acquisition Time       | 1.3631              |
| 7 Acquisition Date       | 2021-10-12T09:43:35 |
| 8 Spectrometer Frequency | 100.61              |
| 9 Spectral Width         | 24038.5             |

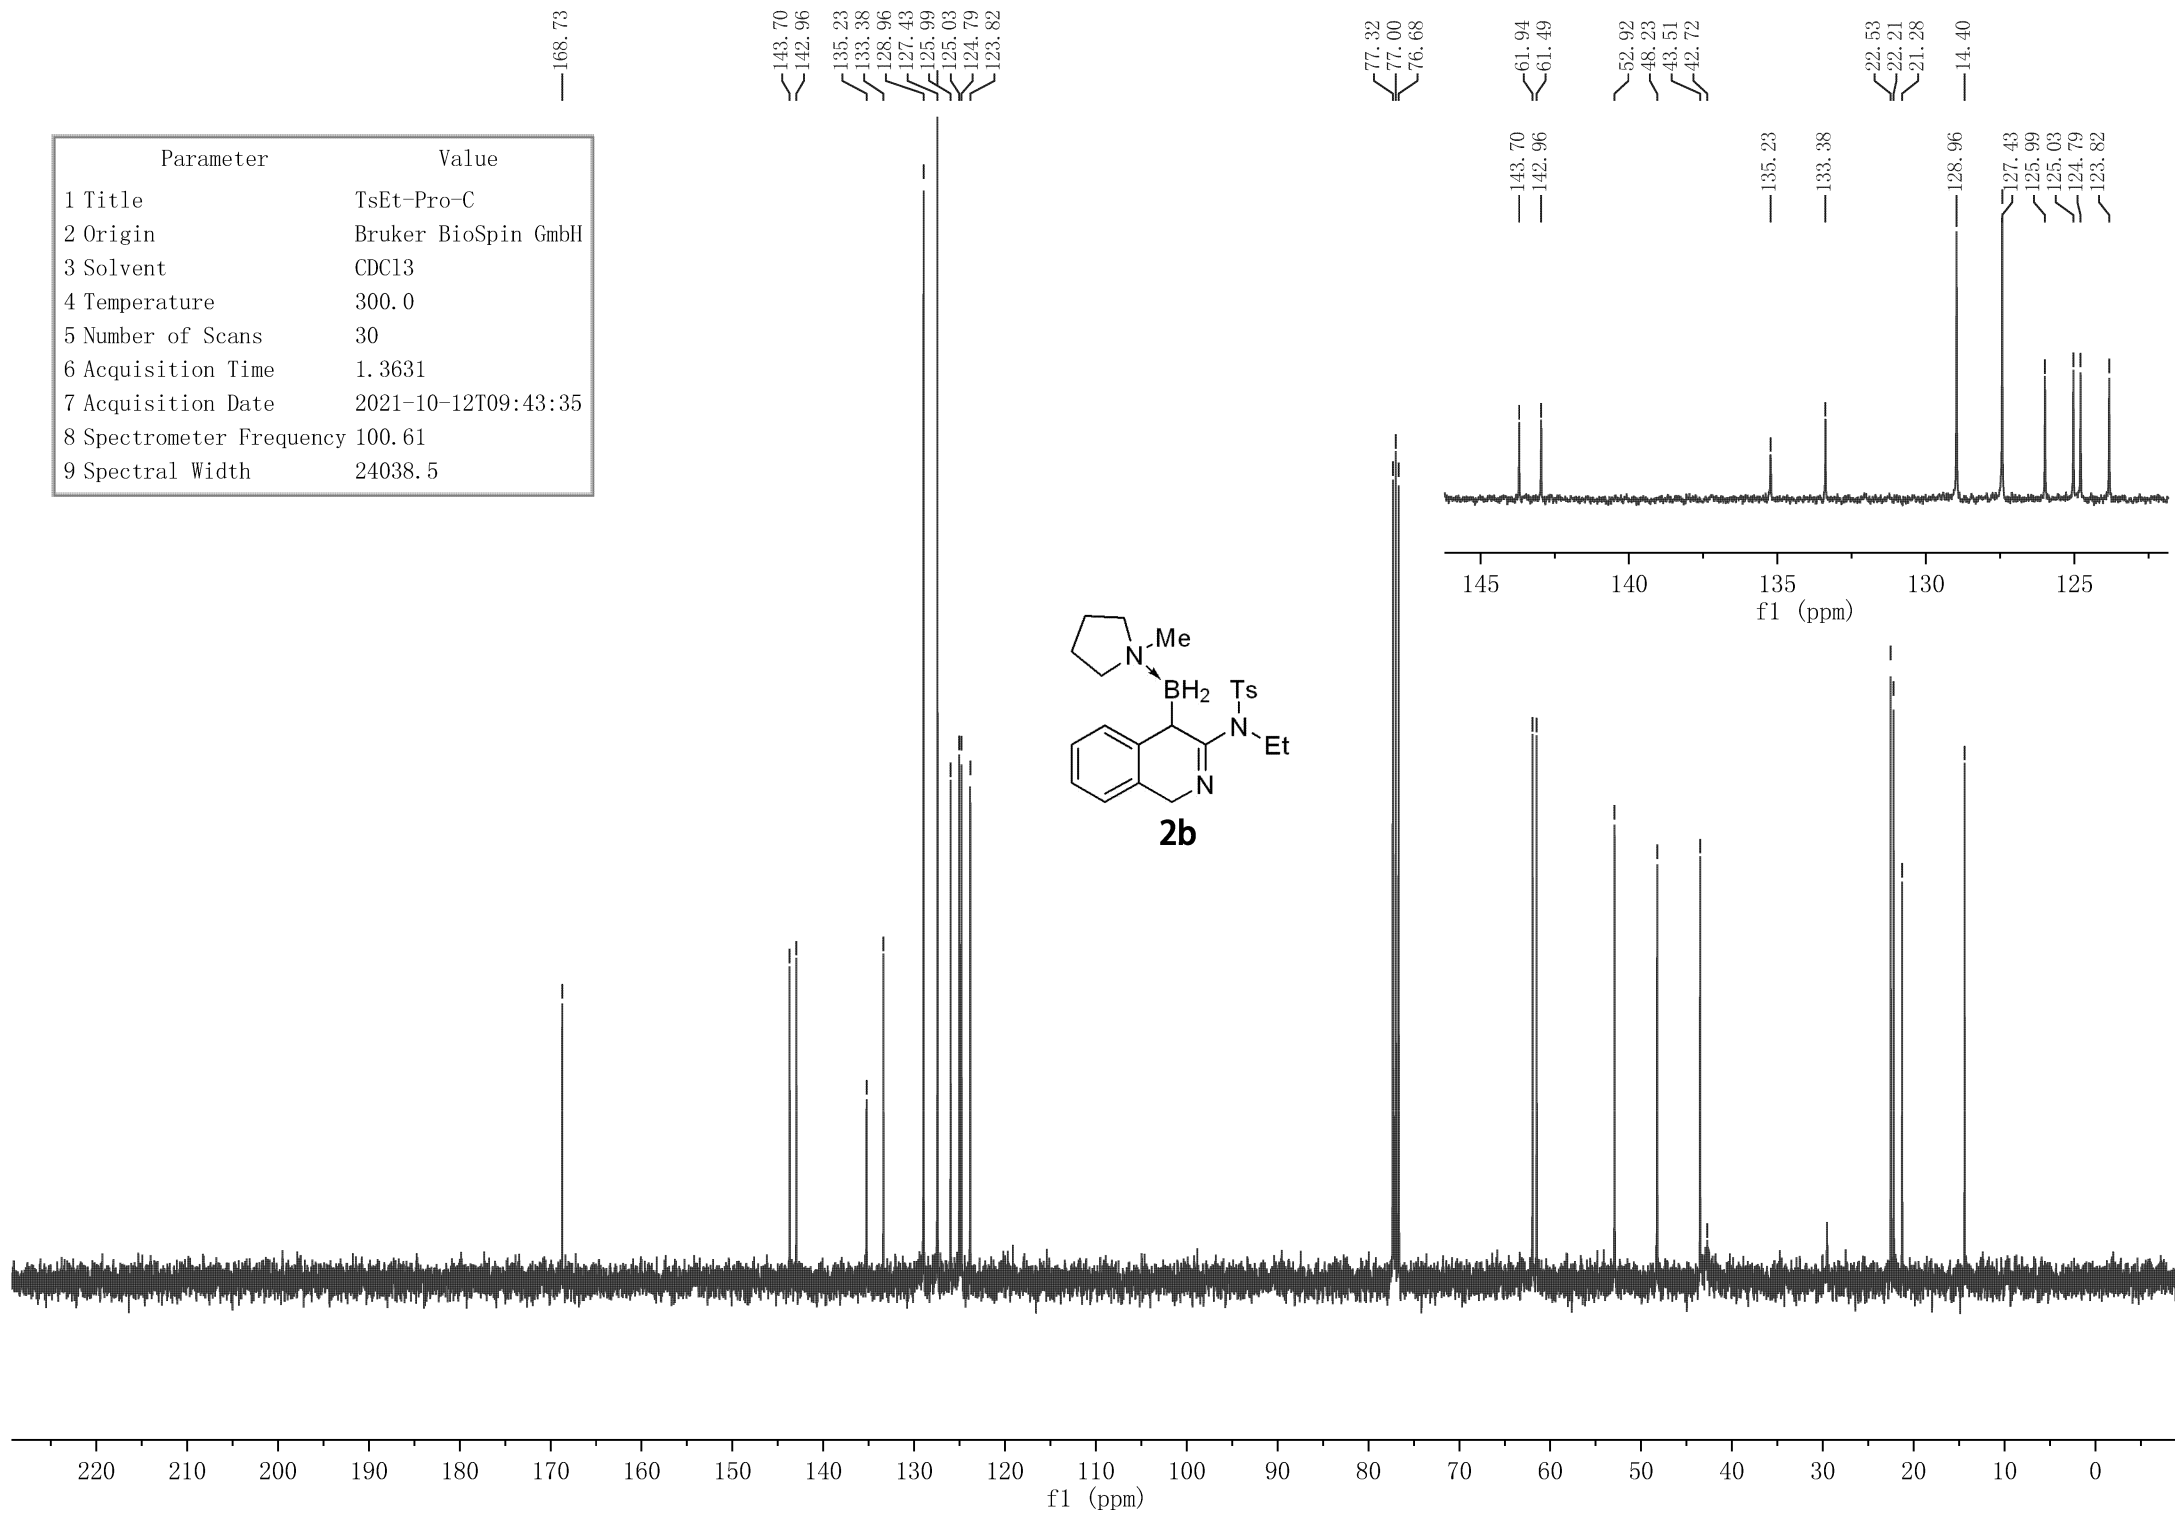

7.450  
7.428  
7.411  
7.390  
7.142  
7.131  
7.124  
7.114  
7.104  
7.083  
7.073  
7.062  
7.044

| Parameter                | Value               |
|--------------------------|---------------------|
| 1 Title                  | BsEt-Pro-1H         |
| 2 Origin                 | Bruker BioSpin GmbH |
| 3 Solvent                | CDC13               |
| 4 Temperature            | 298.0               |
| 5 Number of Scans        | 6                   |
| 6 Acquisition Time       | 4.0894              |
| 7 Acquisition Date       | 2021-10-10T16:25:56 |
| 8 Spectrometer Frequency | 400.13              |
| 9 Spectral Width         | 8012.8              |

4.567

4.038  
3.728  
3.711  
3.694  
3.681  
3.664  
3.252  
3.231  
3.223  
3.020  
2.991  
2.925  
2.907  
2.765  
2.752  
2.735  
2.664  
2.656  
1.989  
1.983  
1.959  
1.940  
1.926  
1.903  
1.248  
1.230  
1.212

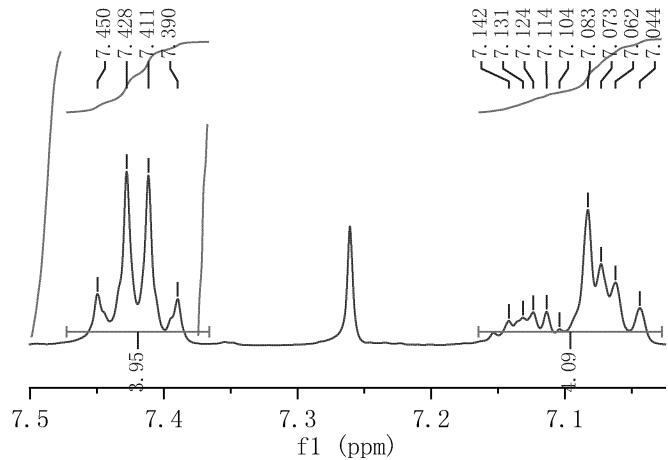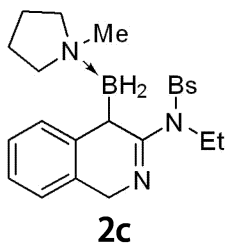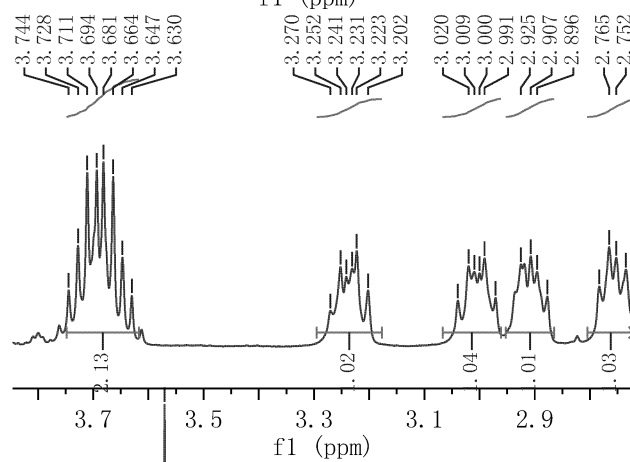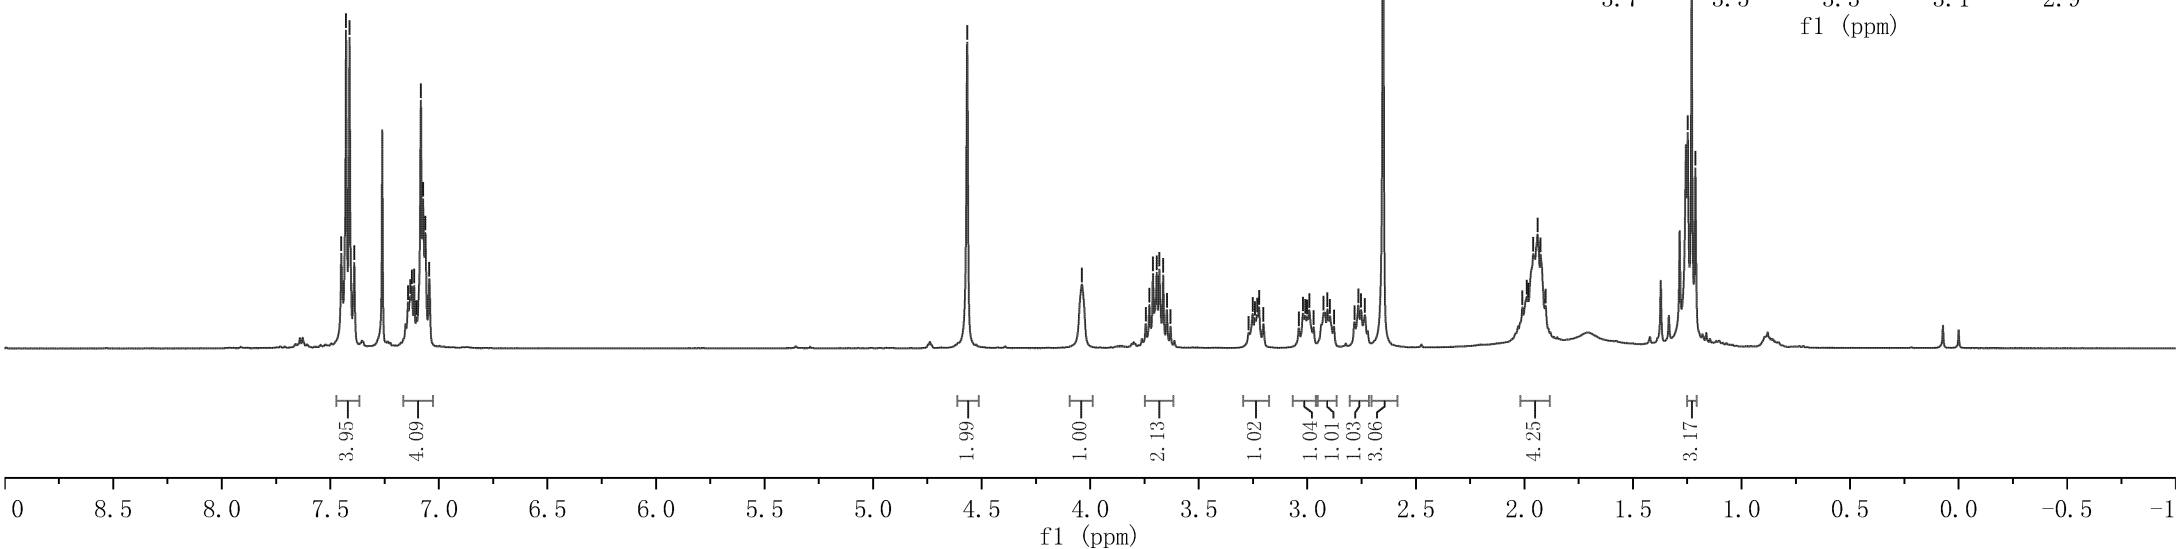



| Parameter                | Value               |
|--------------------------|---------------------|
| 1 Title                  | BsEt-Pro-C          |
| 2 Origin                 | Bruker BioSpin GmbH |
| 3 Solvent                | CDC13               |
| 4 Temperature            | 300.0               |
| 5 Number of Scans        | 71                  |
| 6 Acquisition Time       | 1.3631              |
| 7 Acquisition Date       | 2021-10-10T16:27:56 |
| 8 Spectrometer Frequency | 100.61              |
| 9 Spectral Width         | 24038.5             |

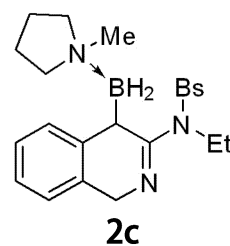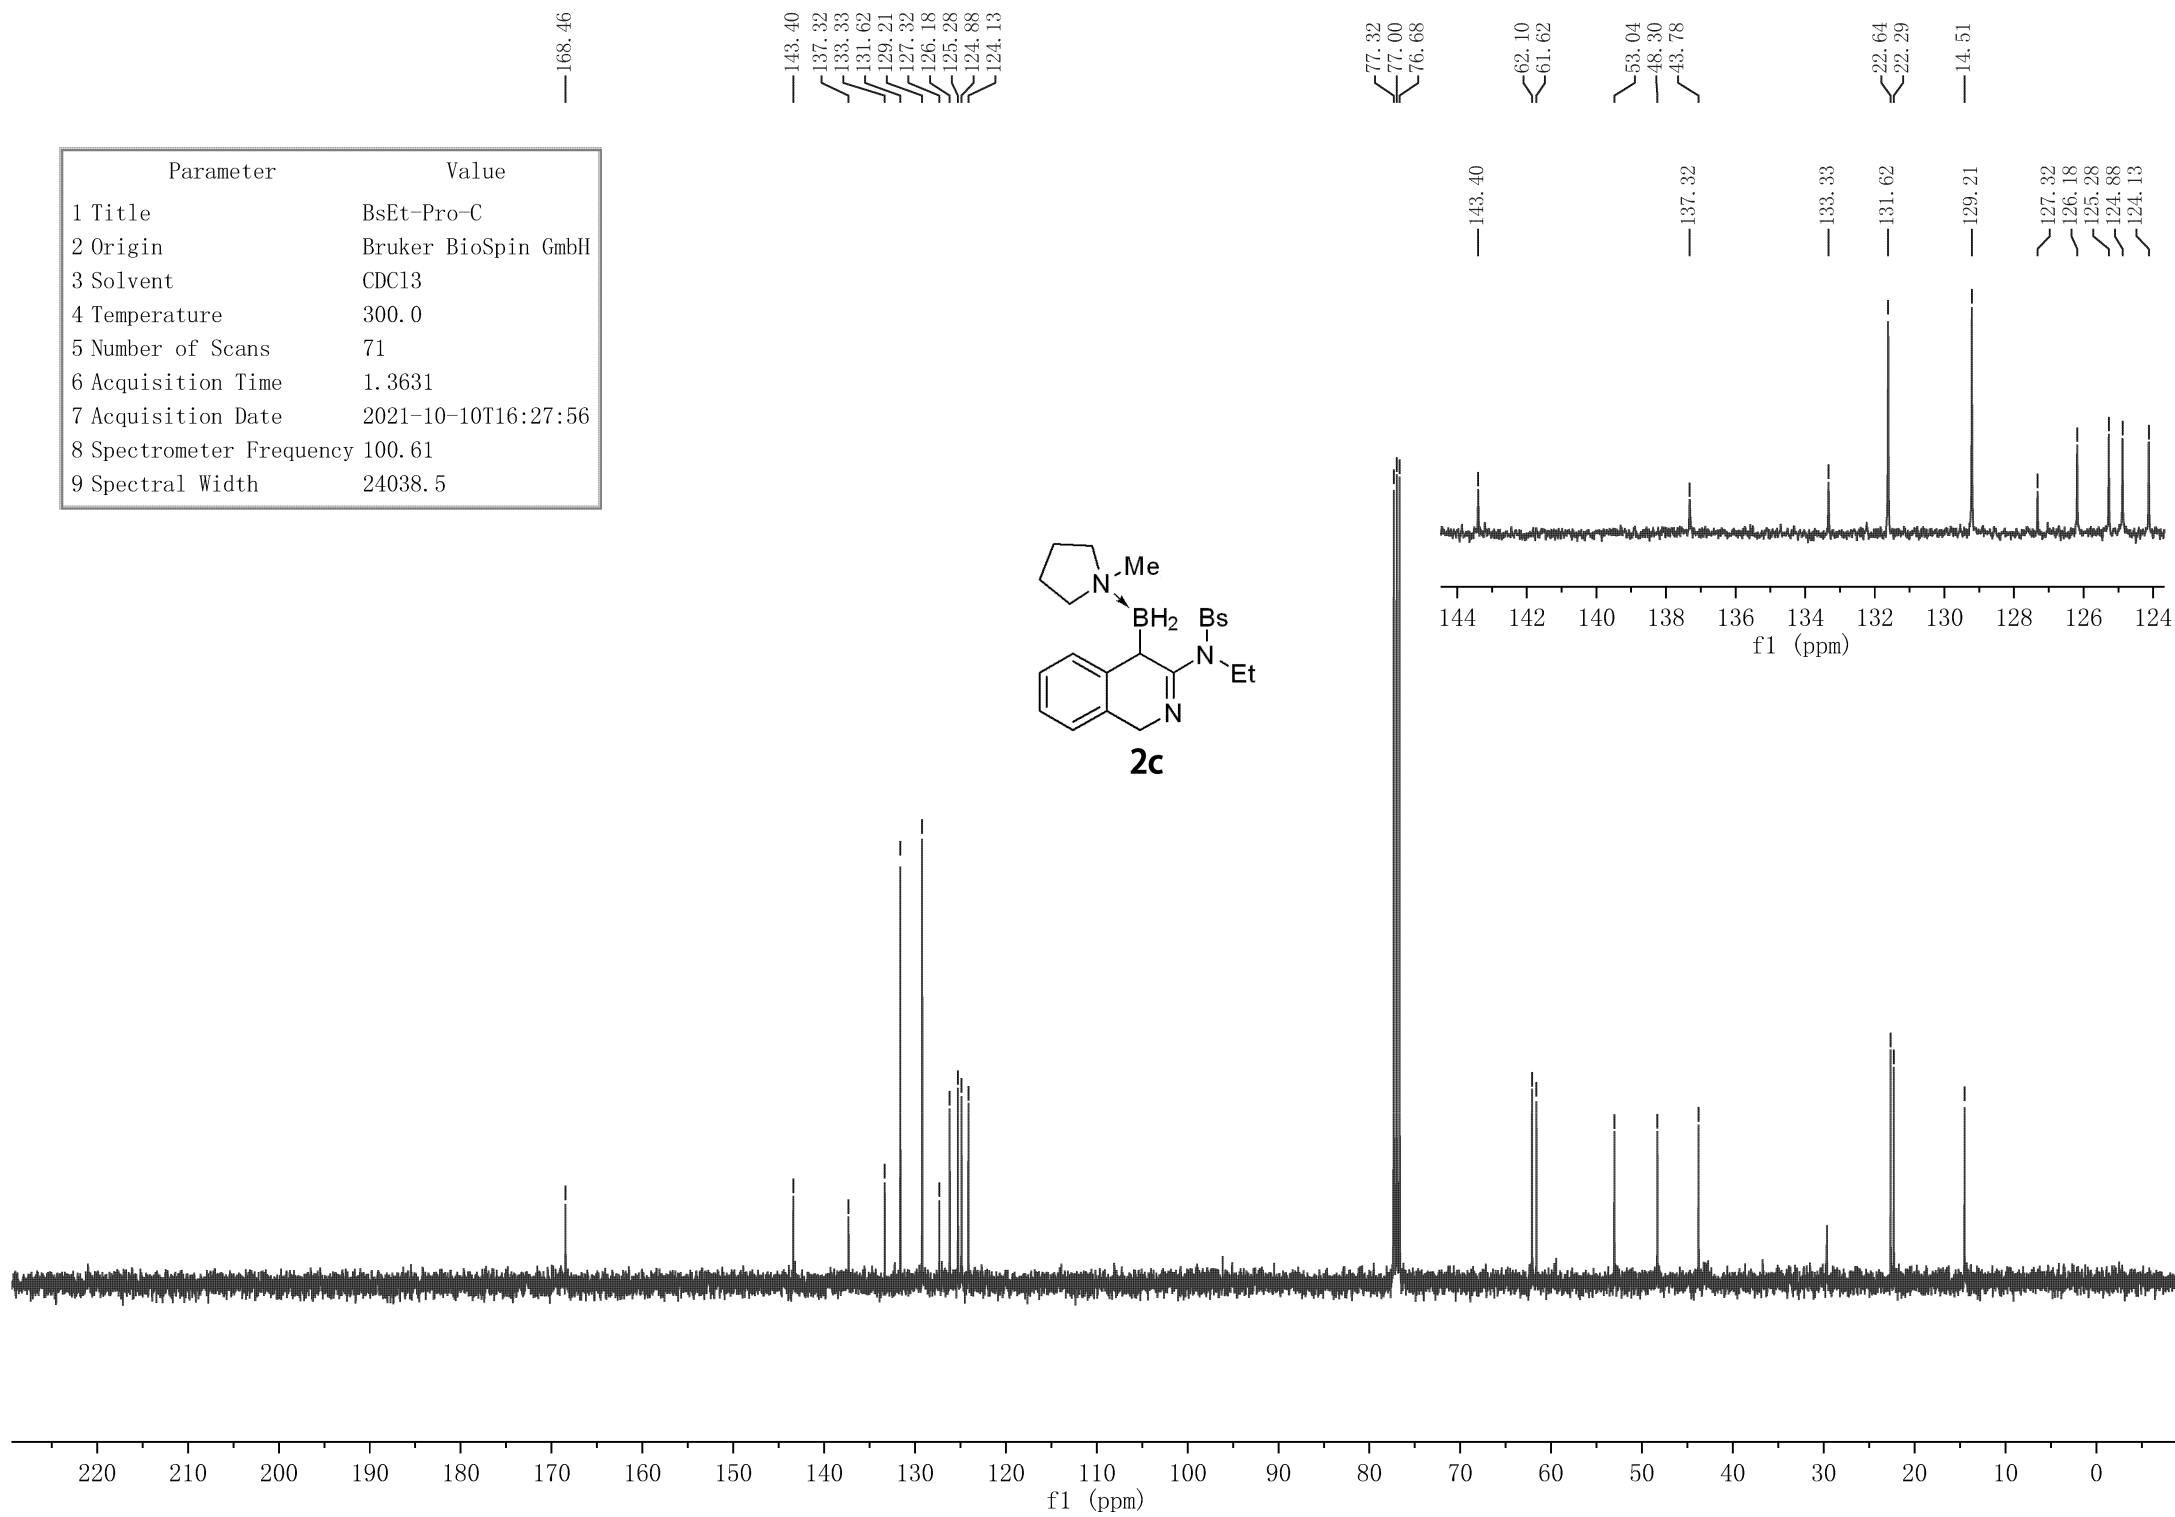

7.588  
7.570  
7.414  
7.396  
7.377  
7.287  
7.266  
7.129  
7.119  
7.112  
7.101  
7.065  
7.056  
7.038

4.560

4.127  
3.769  
3.752  
3.735  
3.710  
3.692  
3.676  
3.266  
3.245  
3.237  
3.002  
2.936  
2.929  
2.918  
2.906  
2.777  
2.764  
2.746  
2.662  
1.982  
1.959  
1.939  
1.925  
1.902

1.264  
1.247  
1.229

| Parameter                | Value               |
|--------------------------|---------------------|
| 1 Title                  | PhSO2Et-Pro-1H      |
| 2 Origin                 | Bruker BioSpin GmbH |
| 3 Solvent                | CDC13               |
| 4 Temperature            | 298.0               |
| 5 Number of Scans        | 8                   |
| 6 Acquisition Time       | 4.0894              |
| 7 Acquisition Date       | 2021-09-18T13:58:55 |
| 8 Spectrometer Frequency | 400.13              |
| 9 Spectral Width         | 8012.8              |

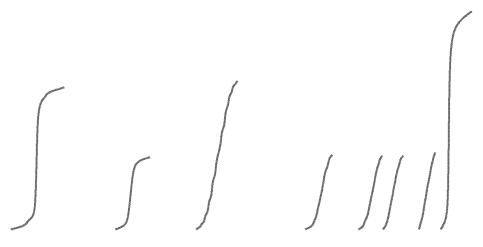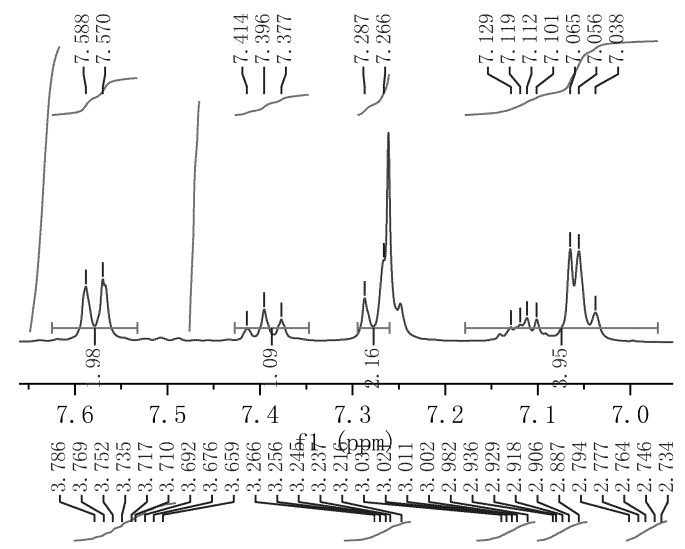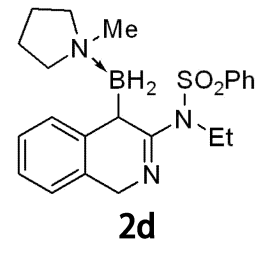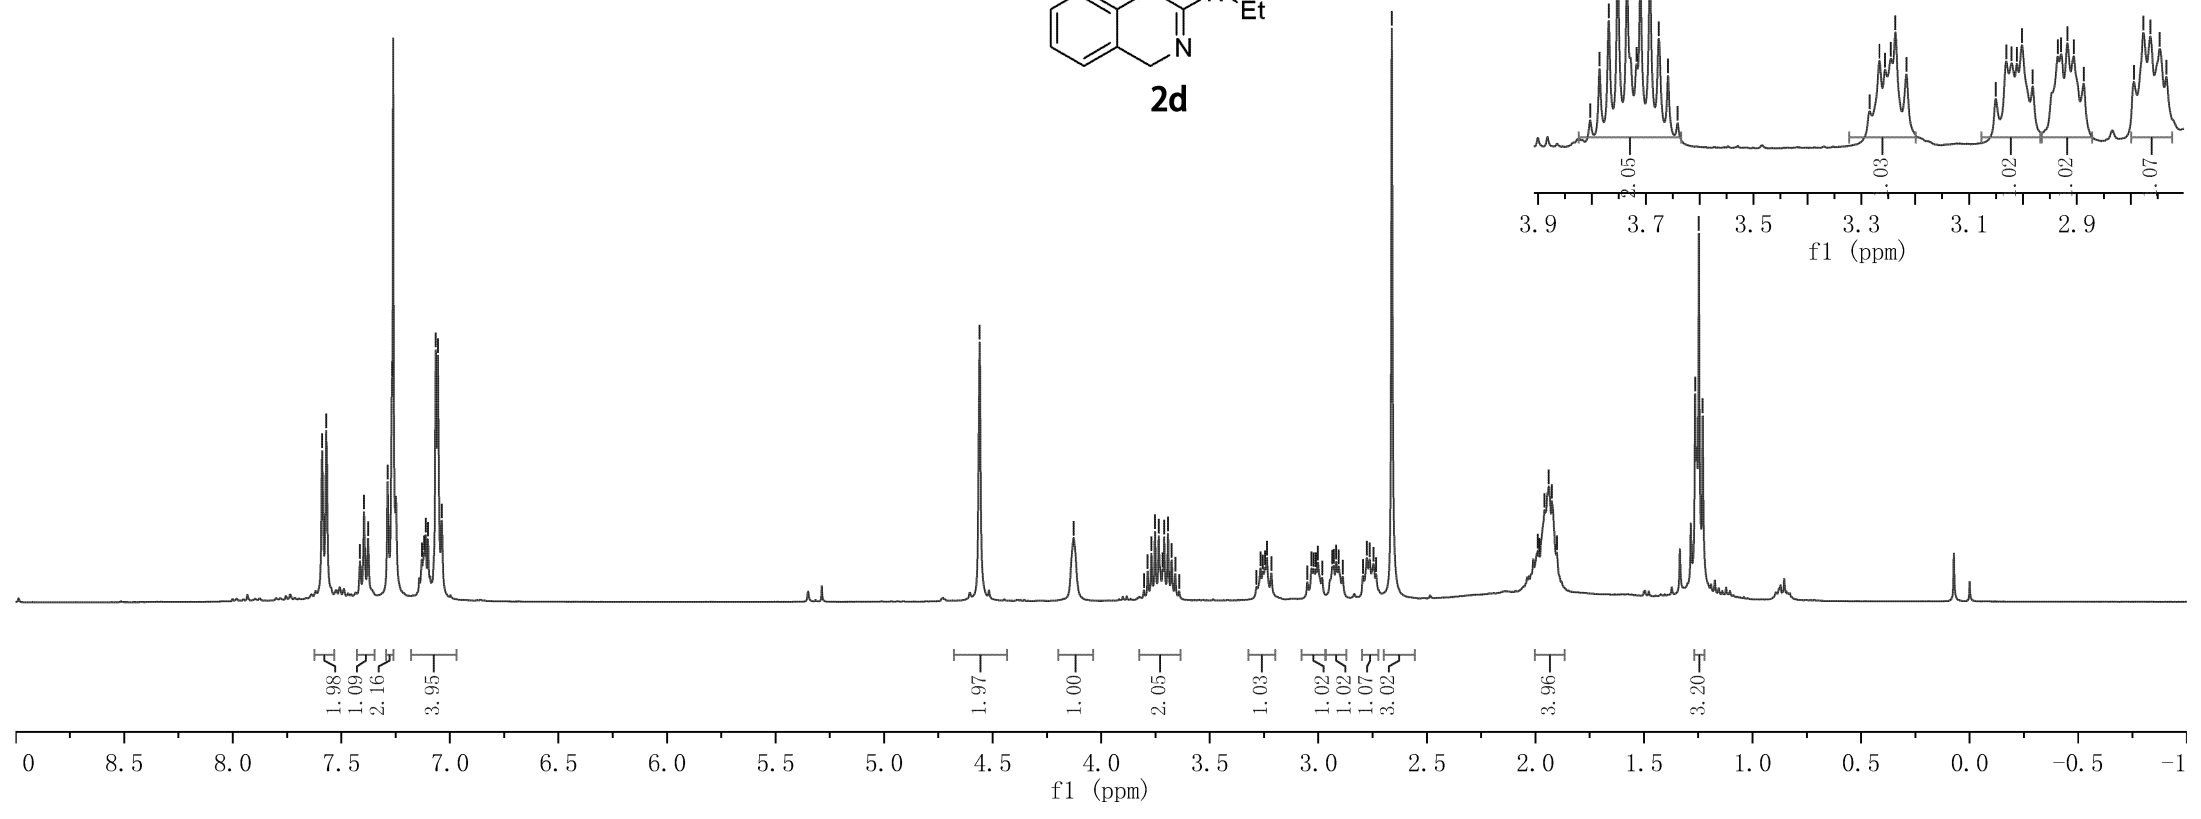

| Parameter                | Value               |
|--------------------------|---------------------|
| 1 Title                  | PhSO2Et-Pro-C       |
| 2 Origin                 | Bruker BioSpin GmbH |
| 3 Solvent                | CDC13               |
| 4 Temperature            | 300.0               |
| 5 Number of Scans        | 30                  |
| 6 Acquisition Time       | 1.3631              |
| 7 Acquisition Date       | 2021-09-18T14:00:20 |
| 8 Spectrometer Frequency | 100.61              |
| 9 Spectral Width         | 24038.5             |

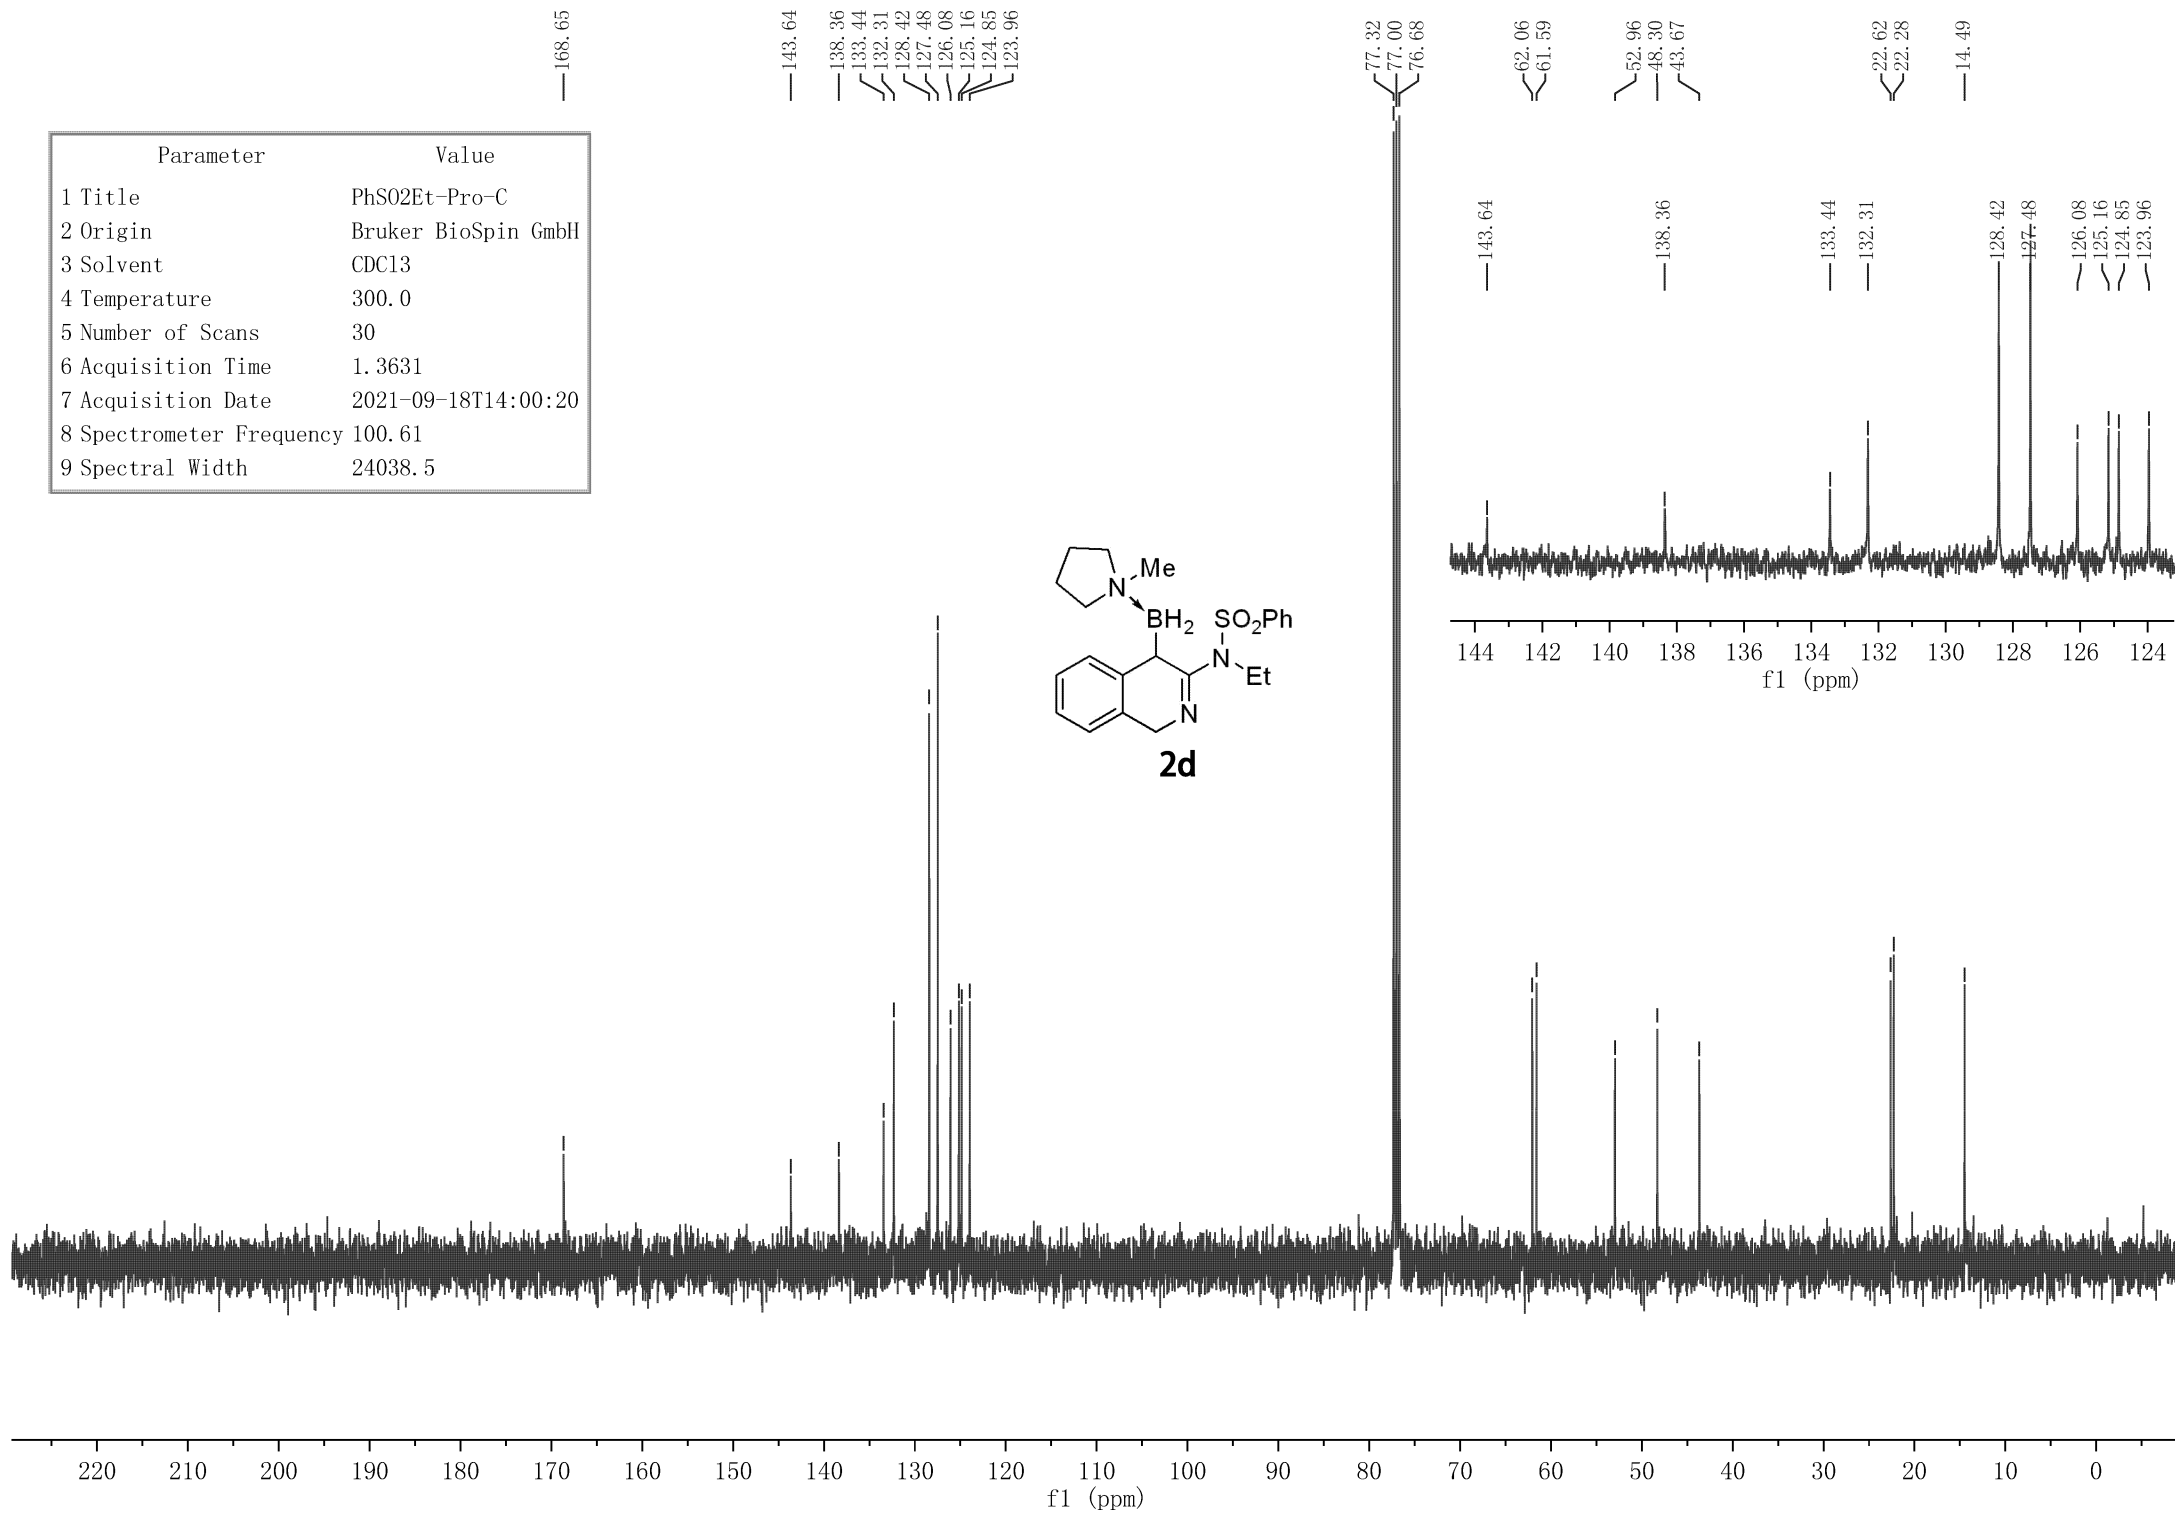

| Parameter                | Value               |
|--------------------------|---------------------|
| 1 Title                  | MbsMe-Pro-III       |
| 2 Origin                 | Bruker BioSpin GmbH |
| 3 Solvent                | CDCl3               |
| 4 Temperature            | 298.0               |
| 5 Number of Scans        | 15                  |
| 6 Acquisition Time       | 4.0894              |
| 7 Acquisition Date       | 2021-10-26T23:34:35 |
| 8 Spectrometer Frequency | 400.13              |
| 9 Spectral Width         | 8012.8              |

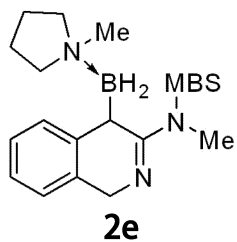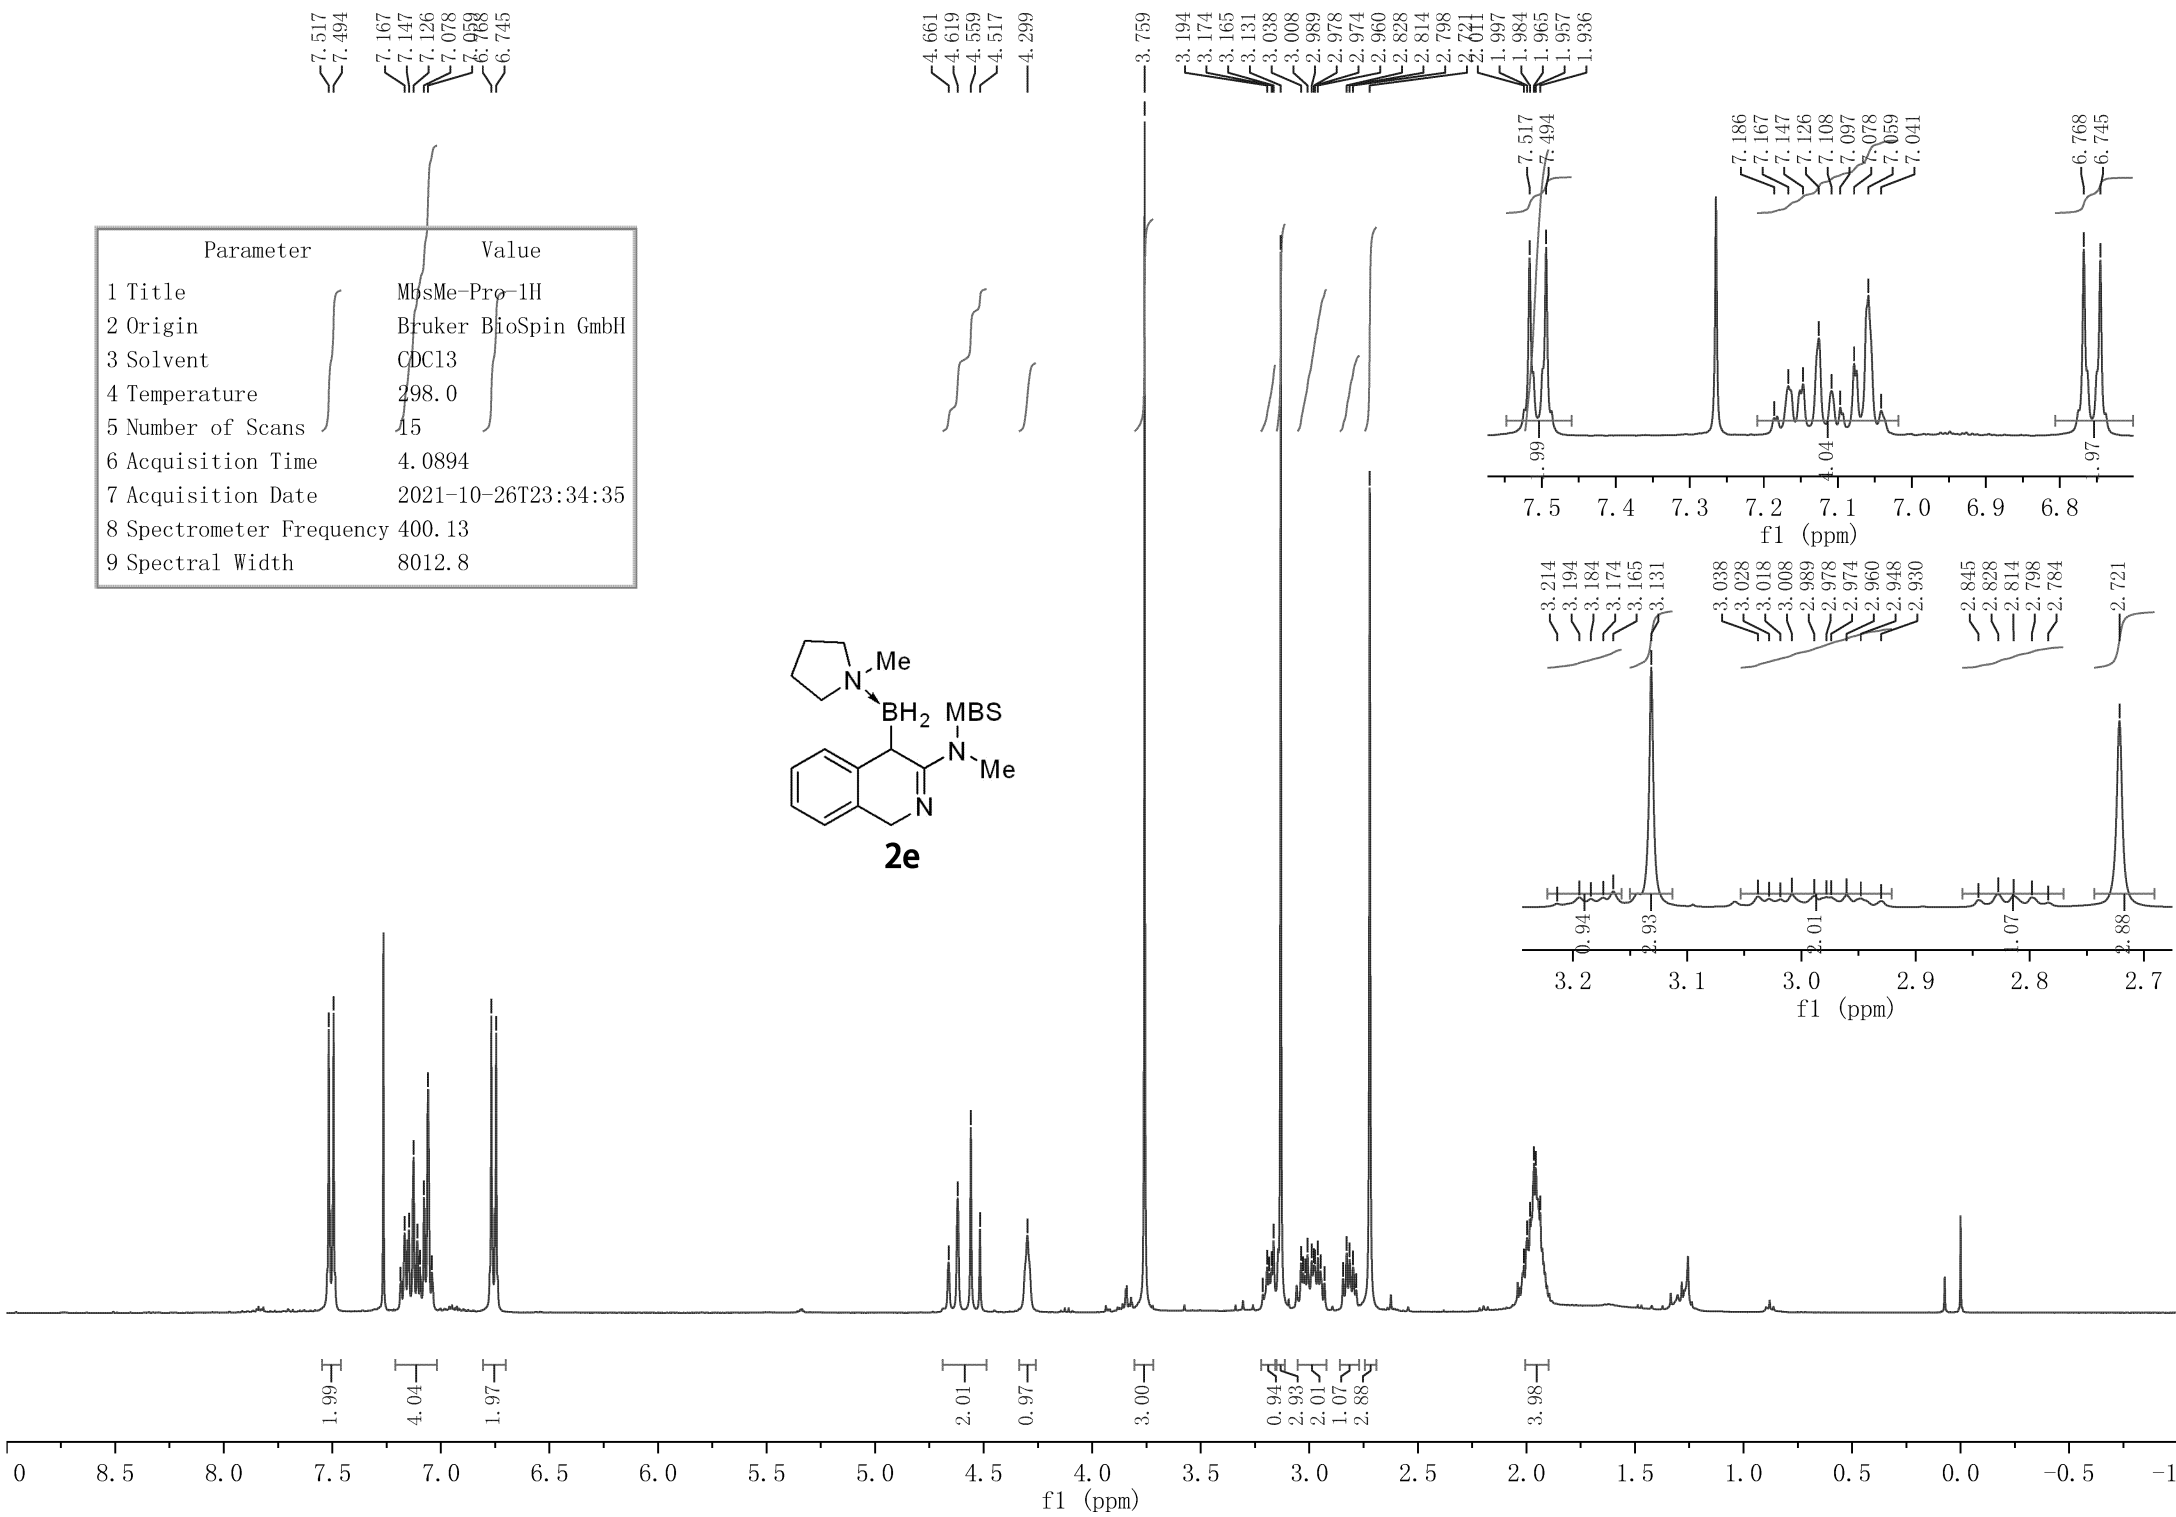

| Parameter                | Value               |
|--------------------------|---------------------|
| 1 Title                  | MbsMe-Pro-C         |
| 2 Origin                 | Bruker BioSpin GmbH |
| 3 Solvent                | CDC13               |
| 4 Temperature            | 300.0               |
| 5 Number of Scans        | 75                  |
| 6 Acquisition Time       | 1.3631              |
| 7 Acquisition Date       | 2021-10-26T23:36:27 |
| 8 Spectrometer Frequency | 100.61              |
| 9 Spectral Width         | 24038.5             |

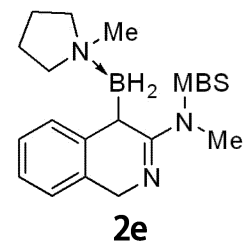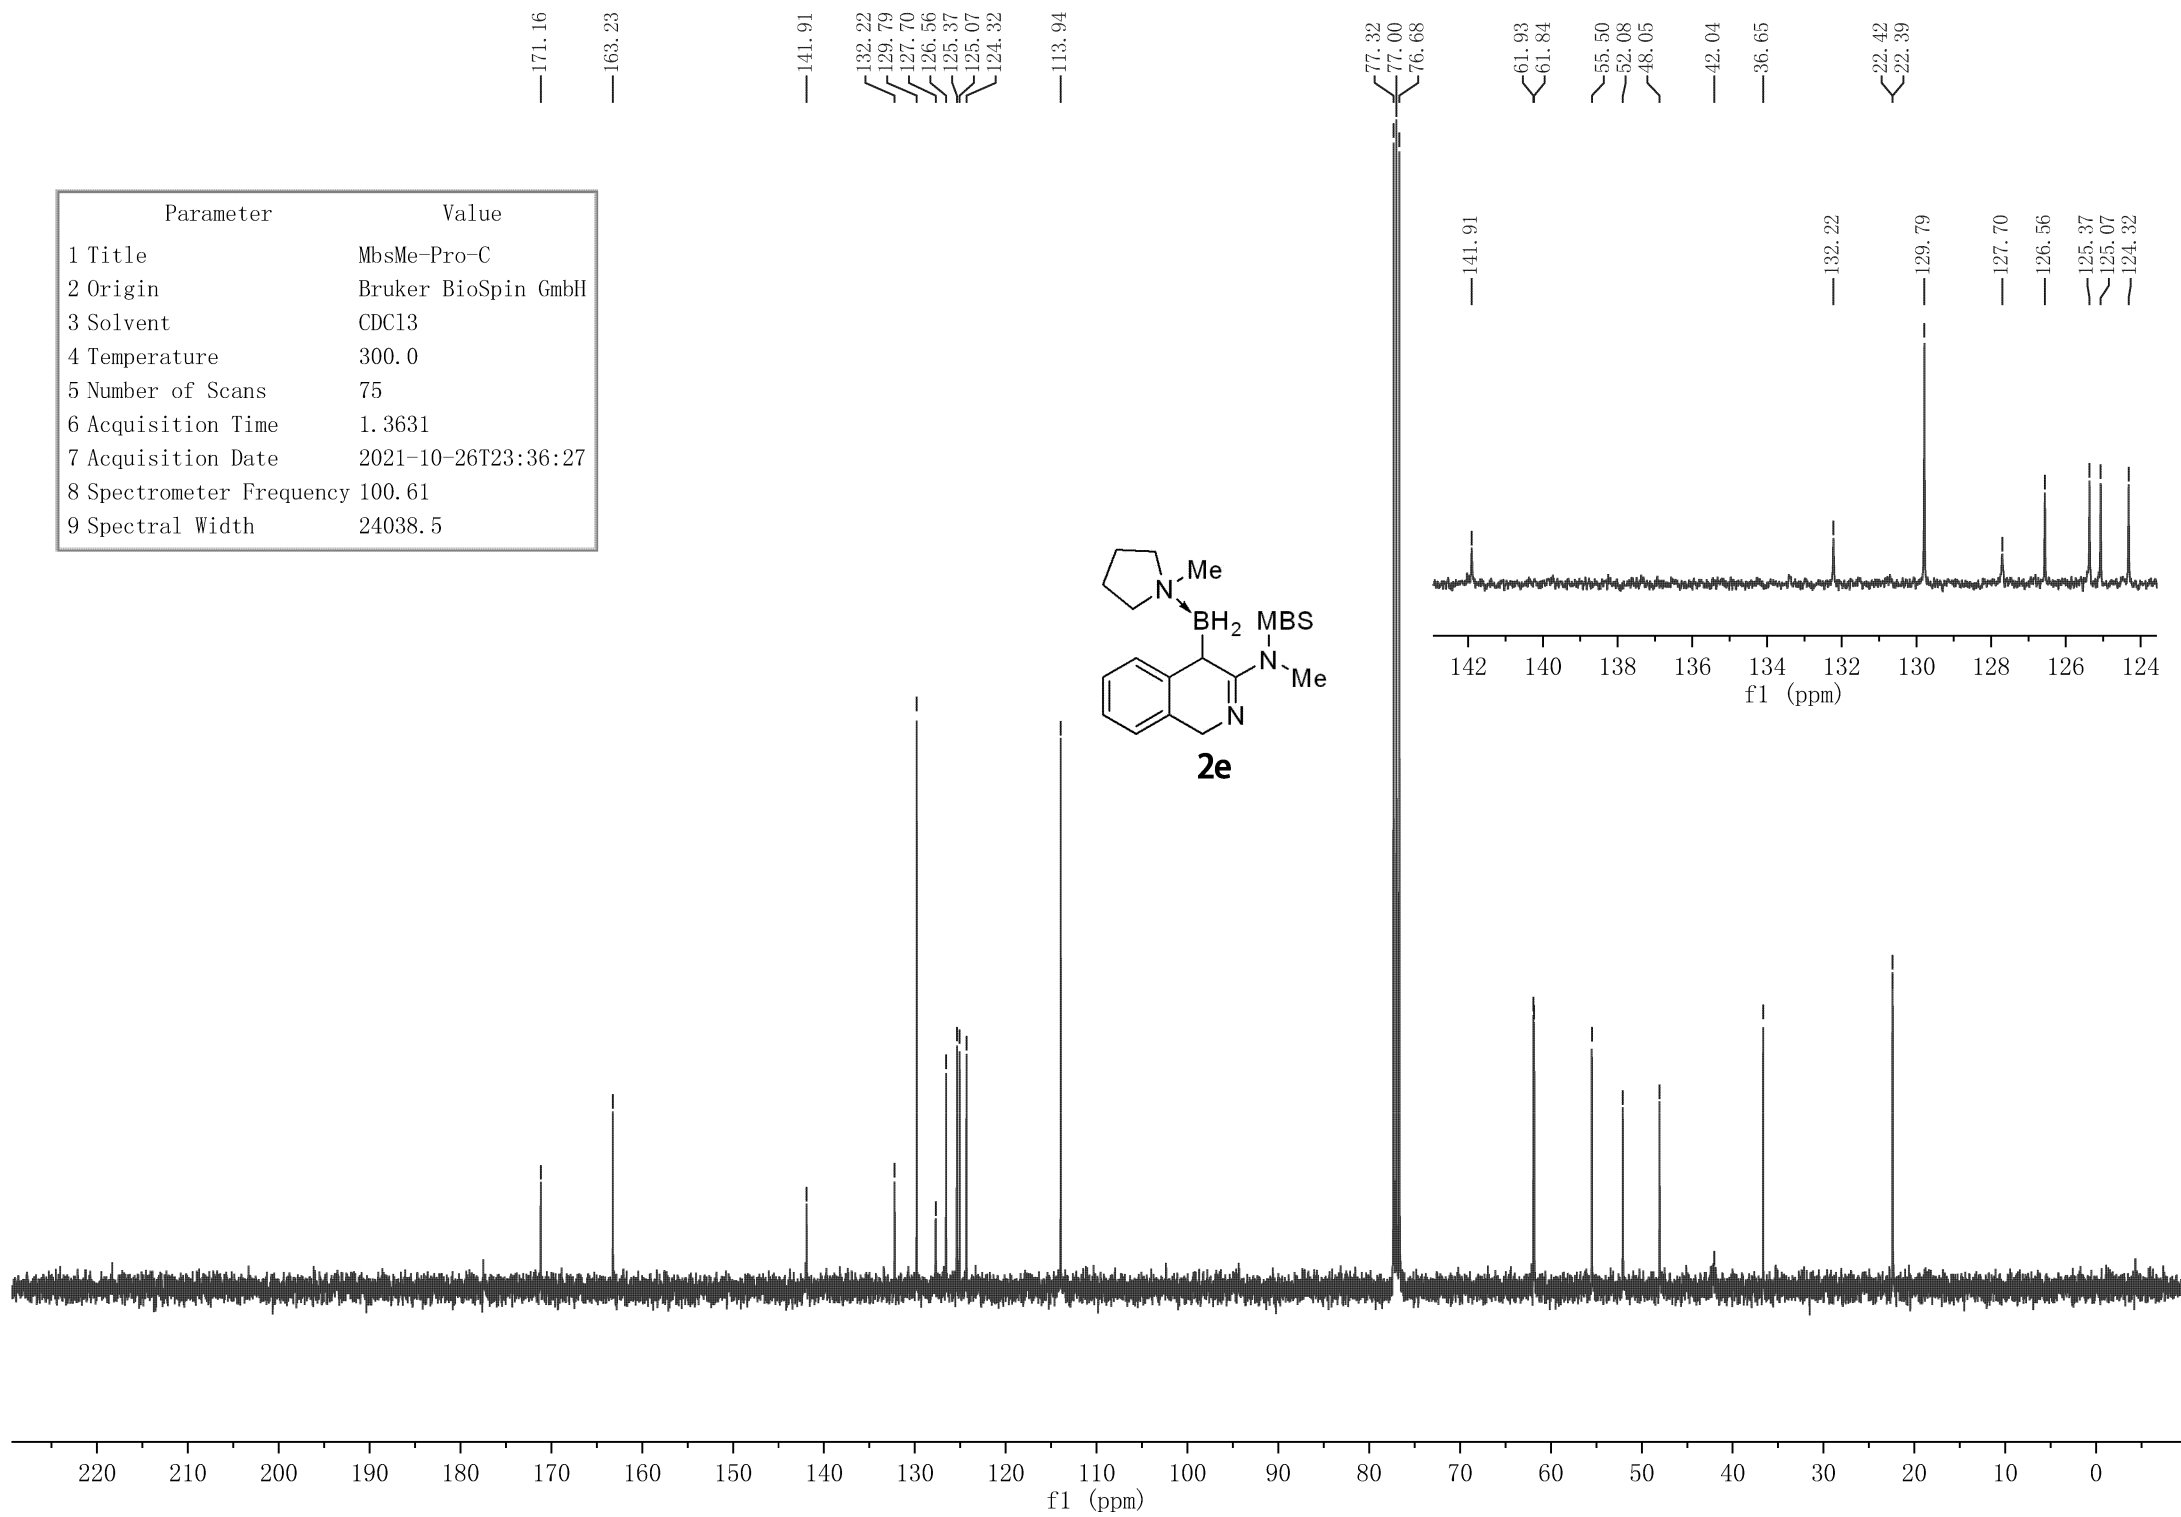

7.573  
7.552  
7.147  
7.137  
7.103  
7.091  
7.068  
6.812  
6.790

4.603

4.106

3.781  
3.688  
3.675  
3.666  
3.592  
3.570  
3.207  
3.178  
3.157  
2.932  
2.909  
2.890  
2.882  
2.718  
2.704  
2.625  
2.688  
1.968  
1.927  
1.916  
1.866  
1.737  
1.719  
1.702  
1.683  
1.664

0.946  
0.927  
0.909

| Parameter                | Value               |
|--------------------------|---------------------|
| 1 Title                  | Mbsn-pr-Pro-1H      |
| 2 Origin                 | Bruker BioSpin GmbH |
| 3 Solvent                | CDC13               |
| 4 Temperature            | 298.0               |
| 5 Number of Scans        | 30                  |
| 6 Acquisition Time       | 4.0894              |
| 7 Acquisition Date       | 2021-10-26T23:44:35 |
| 8 Spectrometer Frequency | 400.13              |
| 9 Spectral Width         | 8012.8              |

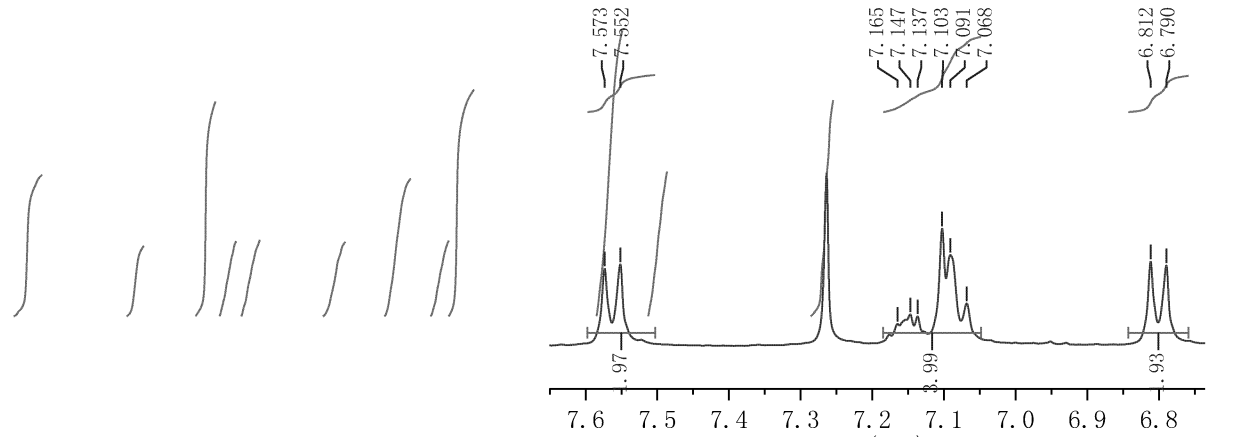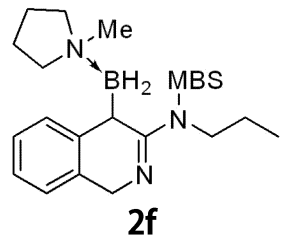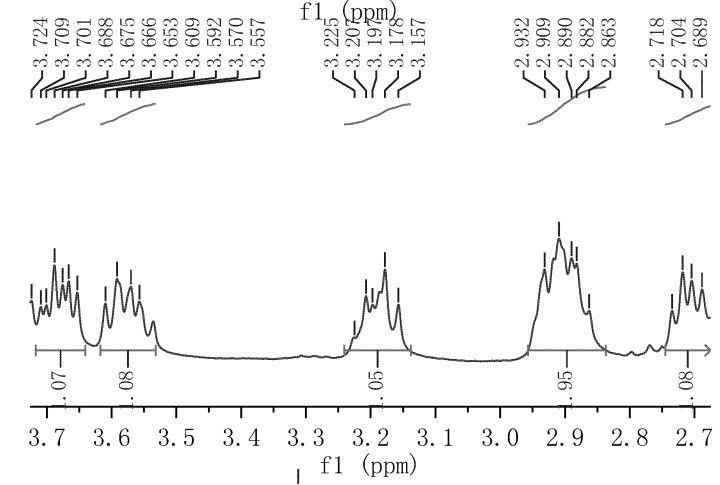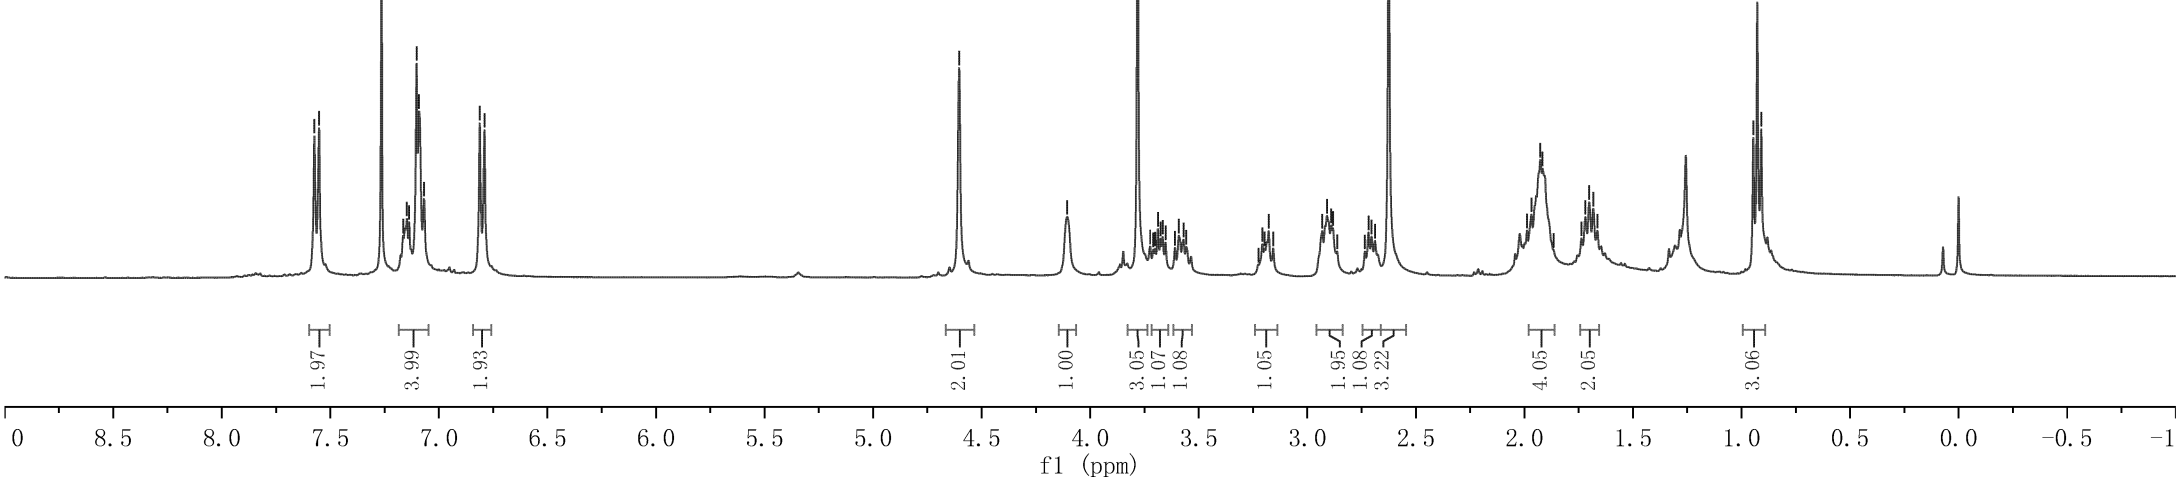

| Parameter                | Value               |
|--------------------------|---------------------|
| 1 Title                  | Mbsn-pr-Pro-C       |
| 2 Origin                 | Bruker BioSpin GmbH |
| 3 Solvent                | CDC13               |
| 4 Temperature            | 300.0               |
| 5 Number of Scans        | 125                 |
| 6 Acquisition Time       | 1.3631              |
| 7 Acquisition Date       | 2021-10-26T23:47:54 |
| 8 Spectrometer Frequency | 100.61              |
| 9 Spectral Width         | 24038.5             |

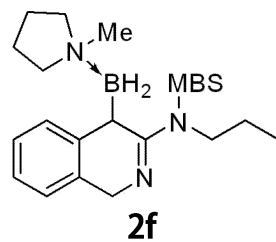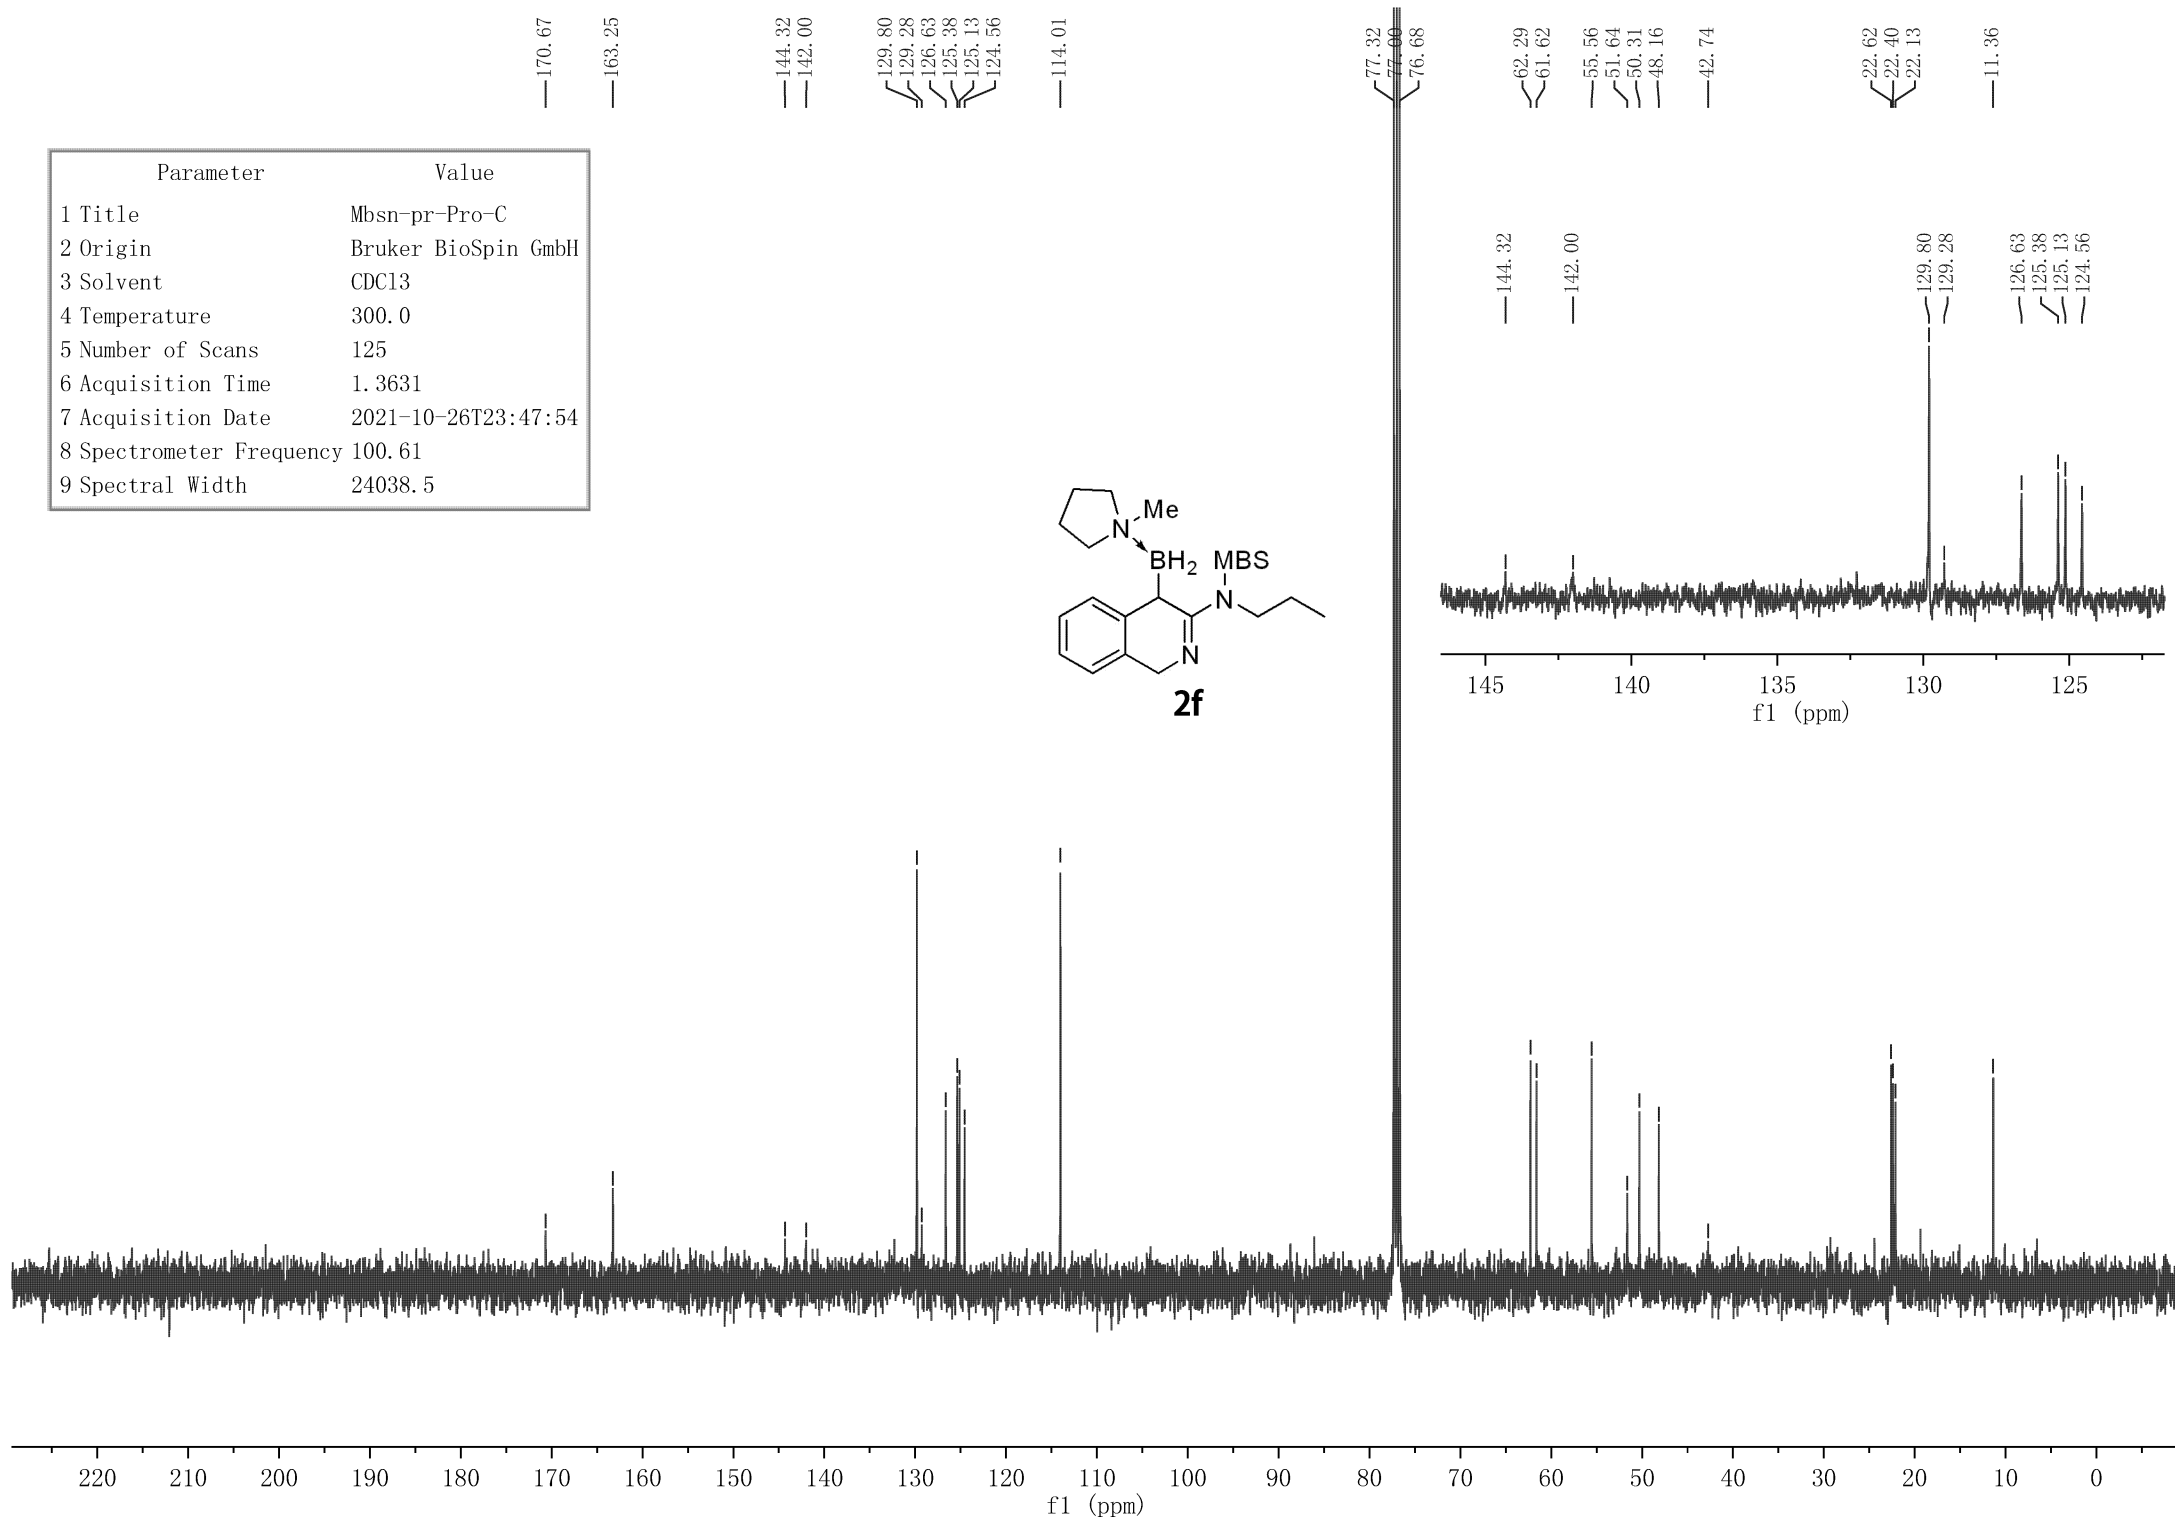

| Parameter                | Value               |
|--------------------------|---------------------|
| 1 Title                  | wcy-3-70-H          |
| 2 Origin                 | Bruker BioSpin GmbH |
| 3 Solvent                | CDC13               |
| 4 Temperature            | 298.0               |
| 5 Number of Scans        | 6                   |
| 6 Acquisition Time       | 4.0894              |
| 7 Acquisition Date       | 2021-11-20T20:05:53 |
| 8 Spectrometer Frequency | 400.13              |
| 9 Spectral Width         | 8012.8              |

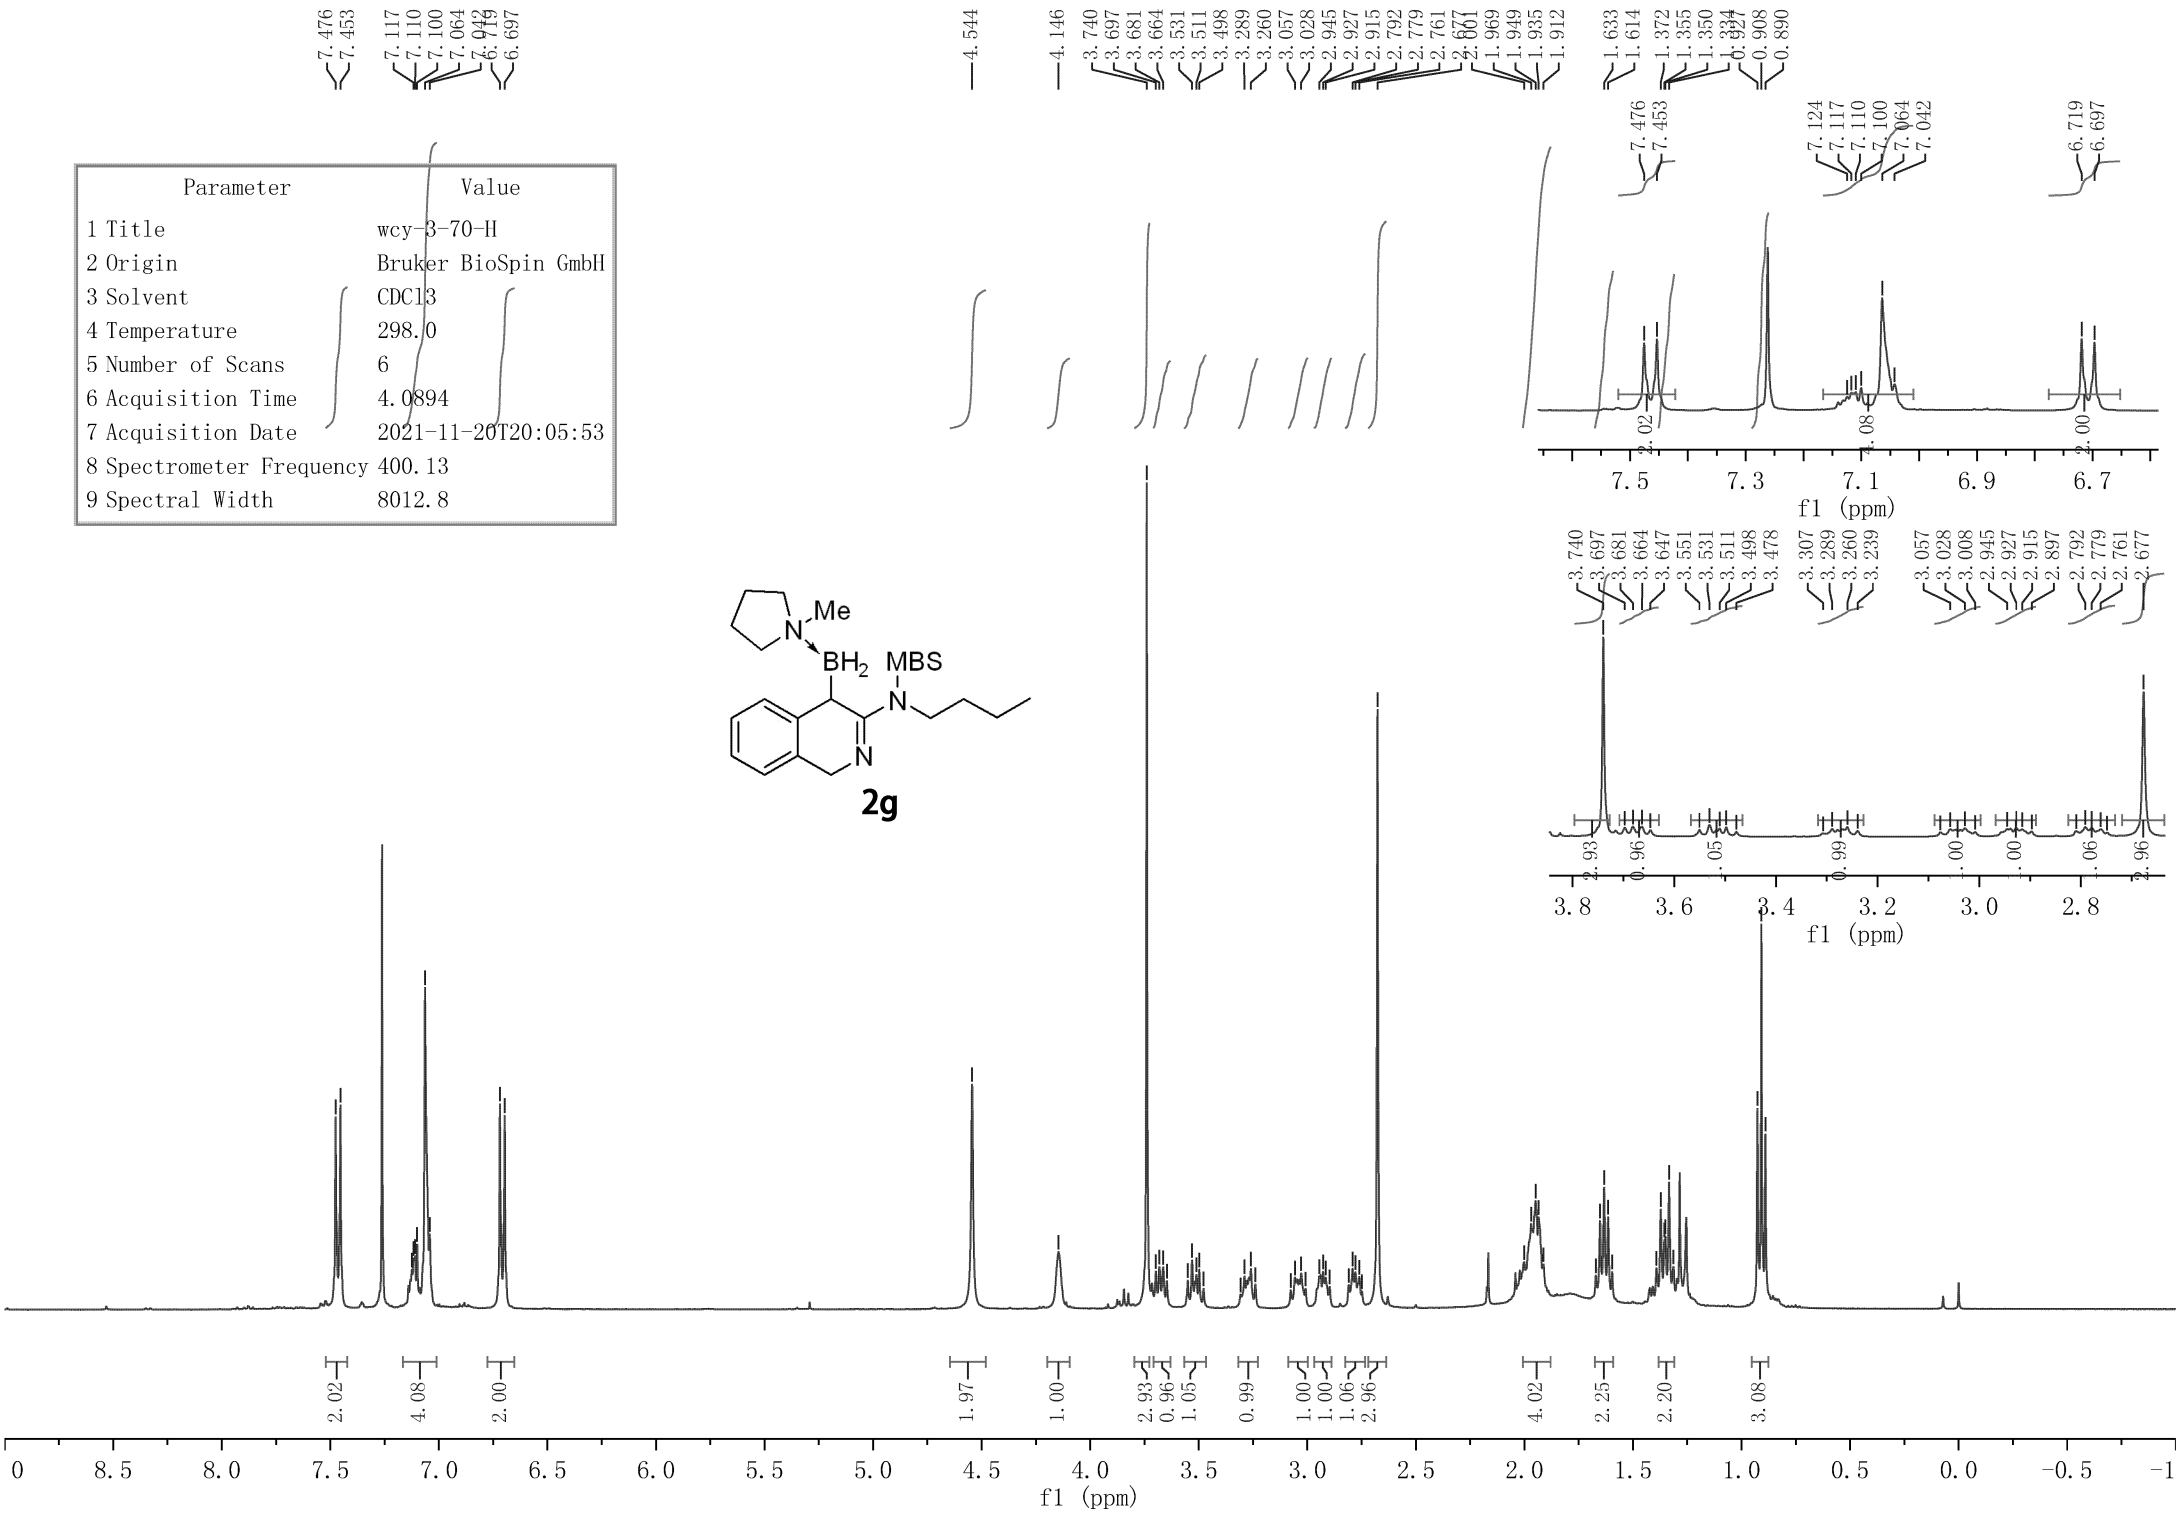



| Parameter                | Value               |
|--------------------------|---------------------|
| 1 Title                  | wcy-3-70-C          |
| 2 Origin                 | Bruker BioSpin GmbH |
| 3 Solvent                | CDCl3               |
| 4 Temperature            | 300.0               |
| 5 Number of Scans        | 200                 |
| 6 Acquisition Time       | 1.3631              |
| 7 Acquisition Date       | 2021-11-20T20:07:08 |
| 8 Spectrometer Frequency | 100.61              |
| 9 Spectral Width         | 24038.5             |

162.57

143.98

133.65

129.99

129.60

126.03

125.16

124.84

123.88

113.60

77.32

77.00

76.68

62.04

61.60

55.39

53.04

48.42

48.38

42.91

30.80

22.68

22.37

20.27

13.77

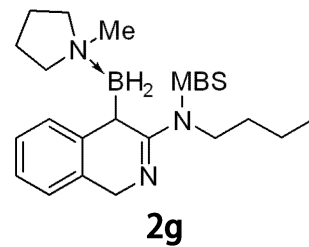

133.65

129.99

129.60

126.03

125.16

124.84

123.88

134 133 132 131 130 129 128 127 126 125 124  
f1 (ppm)

220 210 200 190 180 170 160 150 140 130 120 110 100 90 80 70 60 50 40 30 20 10 0  
f1 (ppm)

7.851  
7.829  
7.090  
7.079  
7.073  
7.058  
7.049  
7.045  
7.033  
7.014  
6.956  
6.938  
6.788  
6.765

4.681  
4.639  
4.615  
4.573

3.811  
3.801  
3.754  
3.730  
3.236  
3.206  
2.999  
2.970  
2.883  
2.871  
2.732  
2.714  
2.702  
2.684  
2.608  
2.153  
2.145  
1.972  
1.938  
1.913  
1.896  
1.682  
1.657  
1.611  
1.581  
1.158  
1.127  
1.093  
1.061

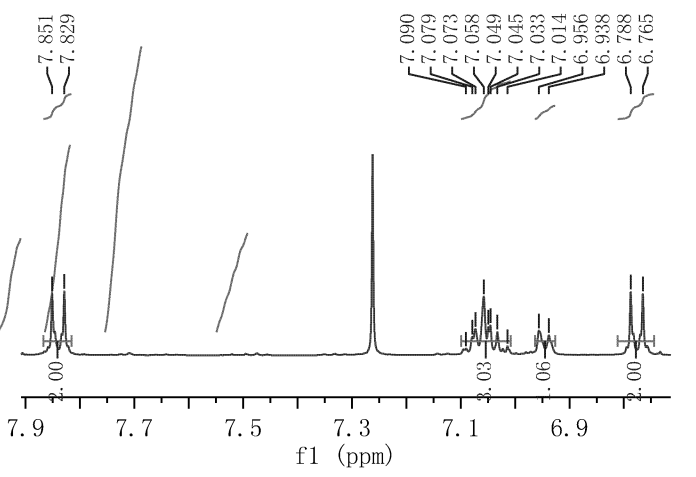

| Parameter                | Value               |
|--------------------------|---------------------|
| 1 Title                  | MbsCy-Pro-1H        |
| 2 Origin                 | Bruker BioSpin GmbH |
| 3 Solvent                | CDC13               |
| 4 Temperature            | 298.0               |
| 5 Number of Scans        | 13                  |
| 6 Acquisition Time       | 4.0894              |
| 7 Acquisition Date       | 2021-11-05T20:13:34 |
| 8 Spectrometer Frequency | 400.13              |
| 9 Spectral Width         | 8012.8              |

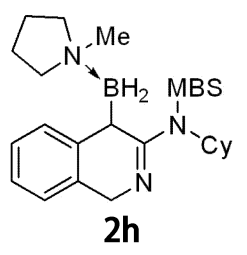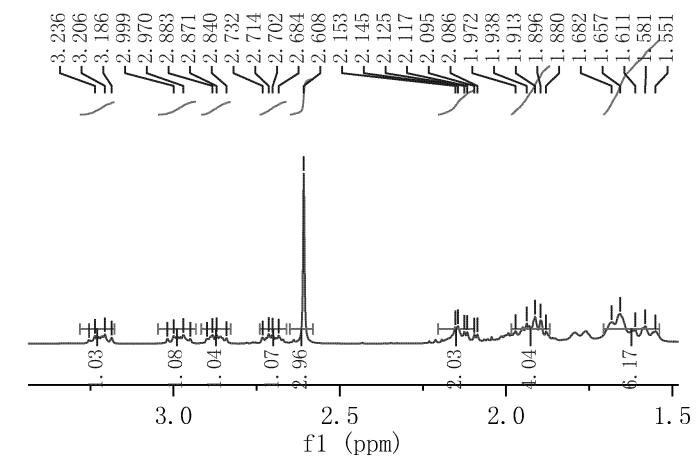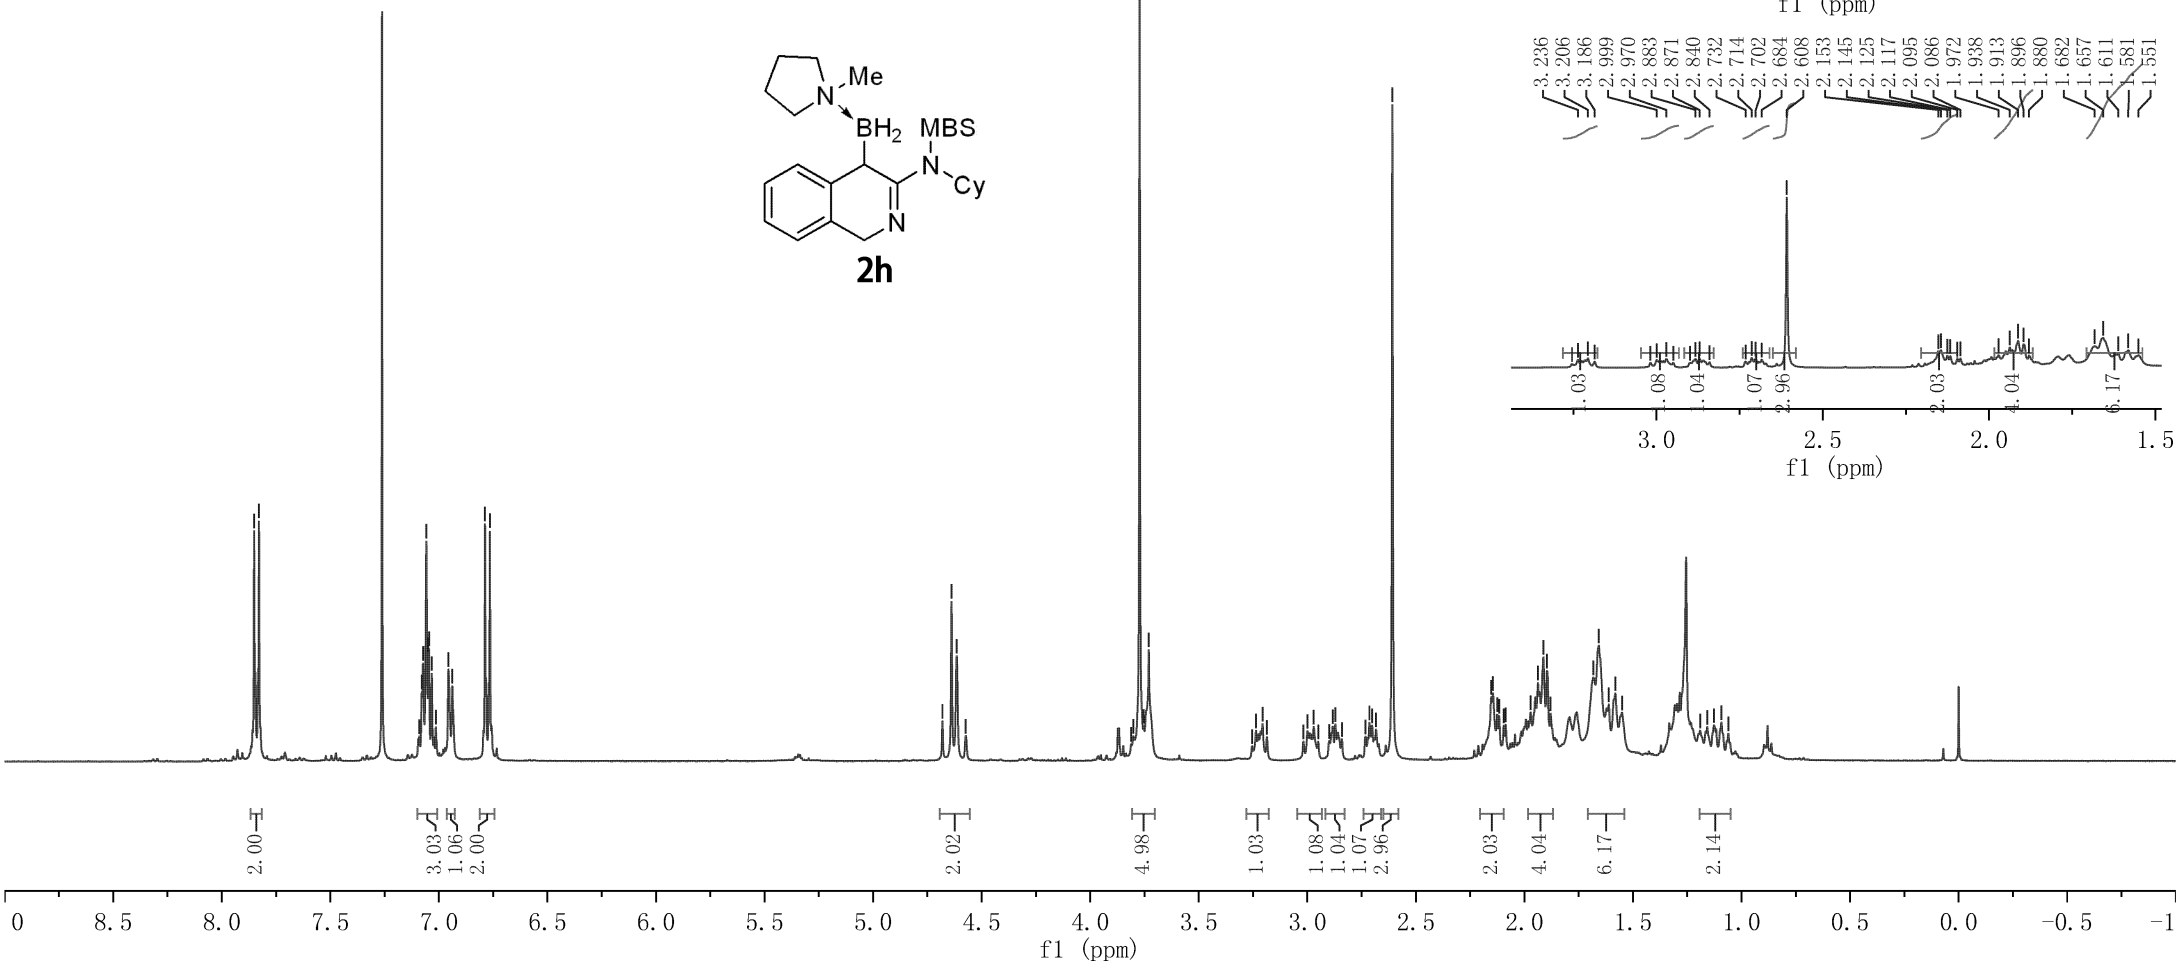

| Parameter                | Value               |
|--------------------------|---------------------|
| 1 Title                  | MbsCy-Pro-C         |
| 2 Origin                 | Bruker BioSpin GmbH |
| 3 Solvent                | CDC13               |
| 4 Temperature            | 300.0               |
| 5 Number of Scans        | 265                 |
| 6 Acquisition Time       | 1.3631              |
| 7 Acquisition Date       | 2021-11-06T22:07:41 |
| 8 Spectrometer Frequency | 100.61              |
| 9 Spectral Width         | 24038.5             |

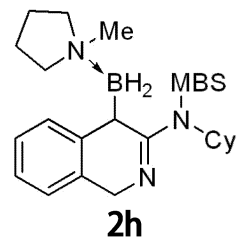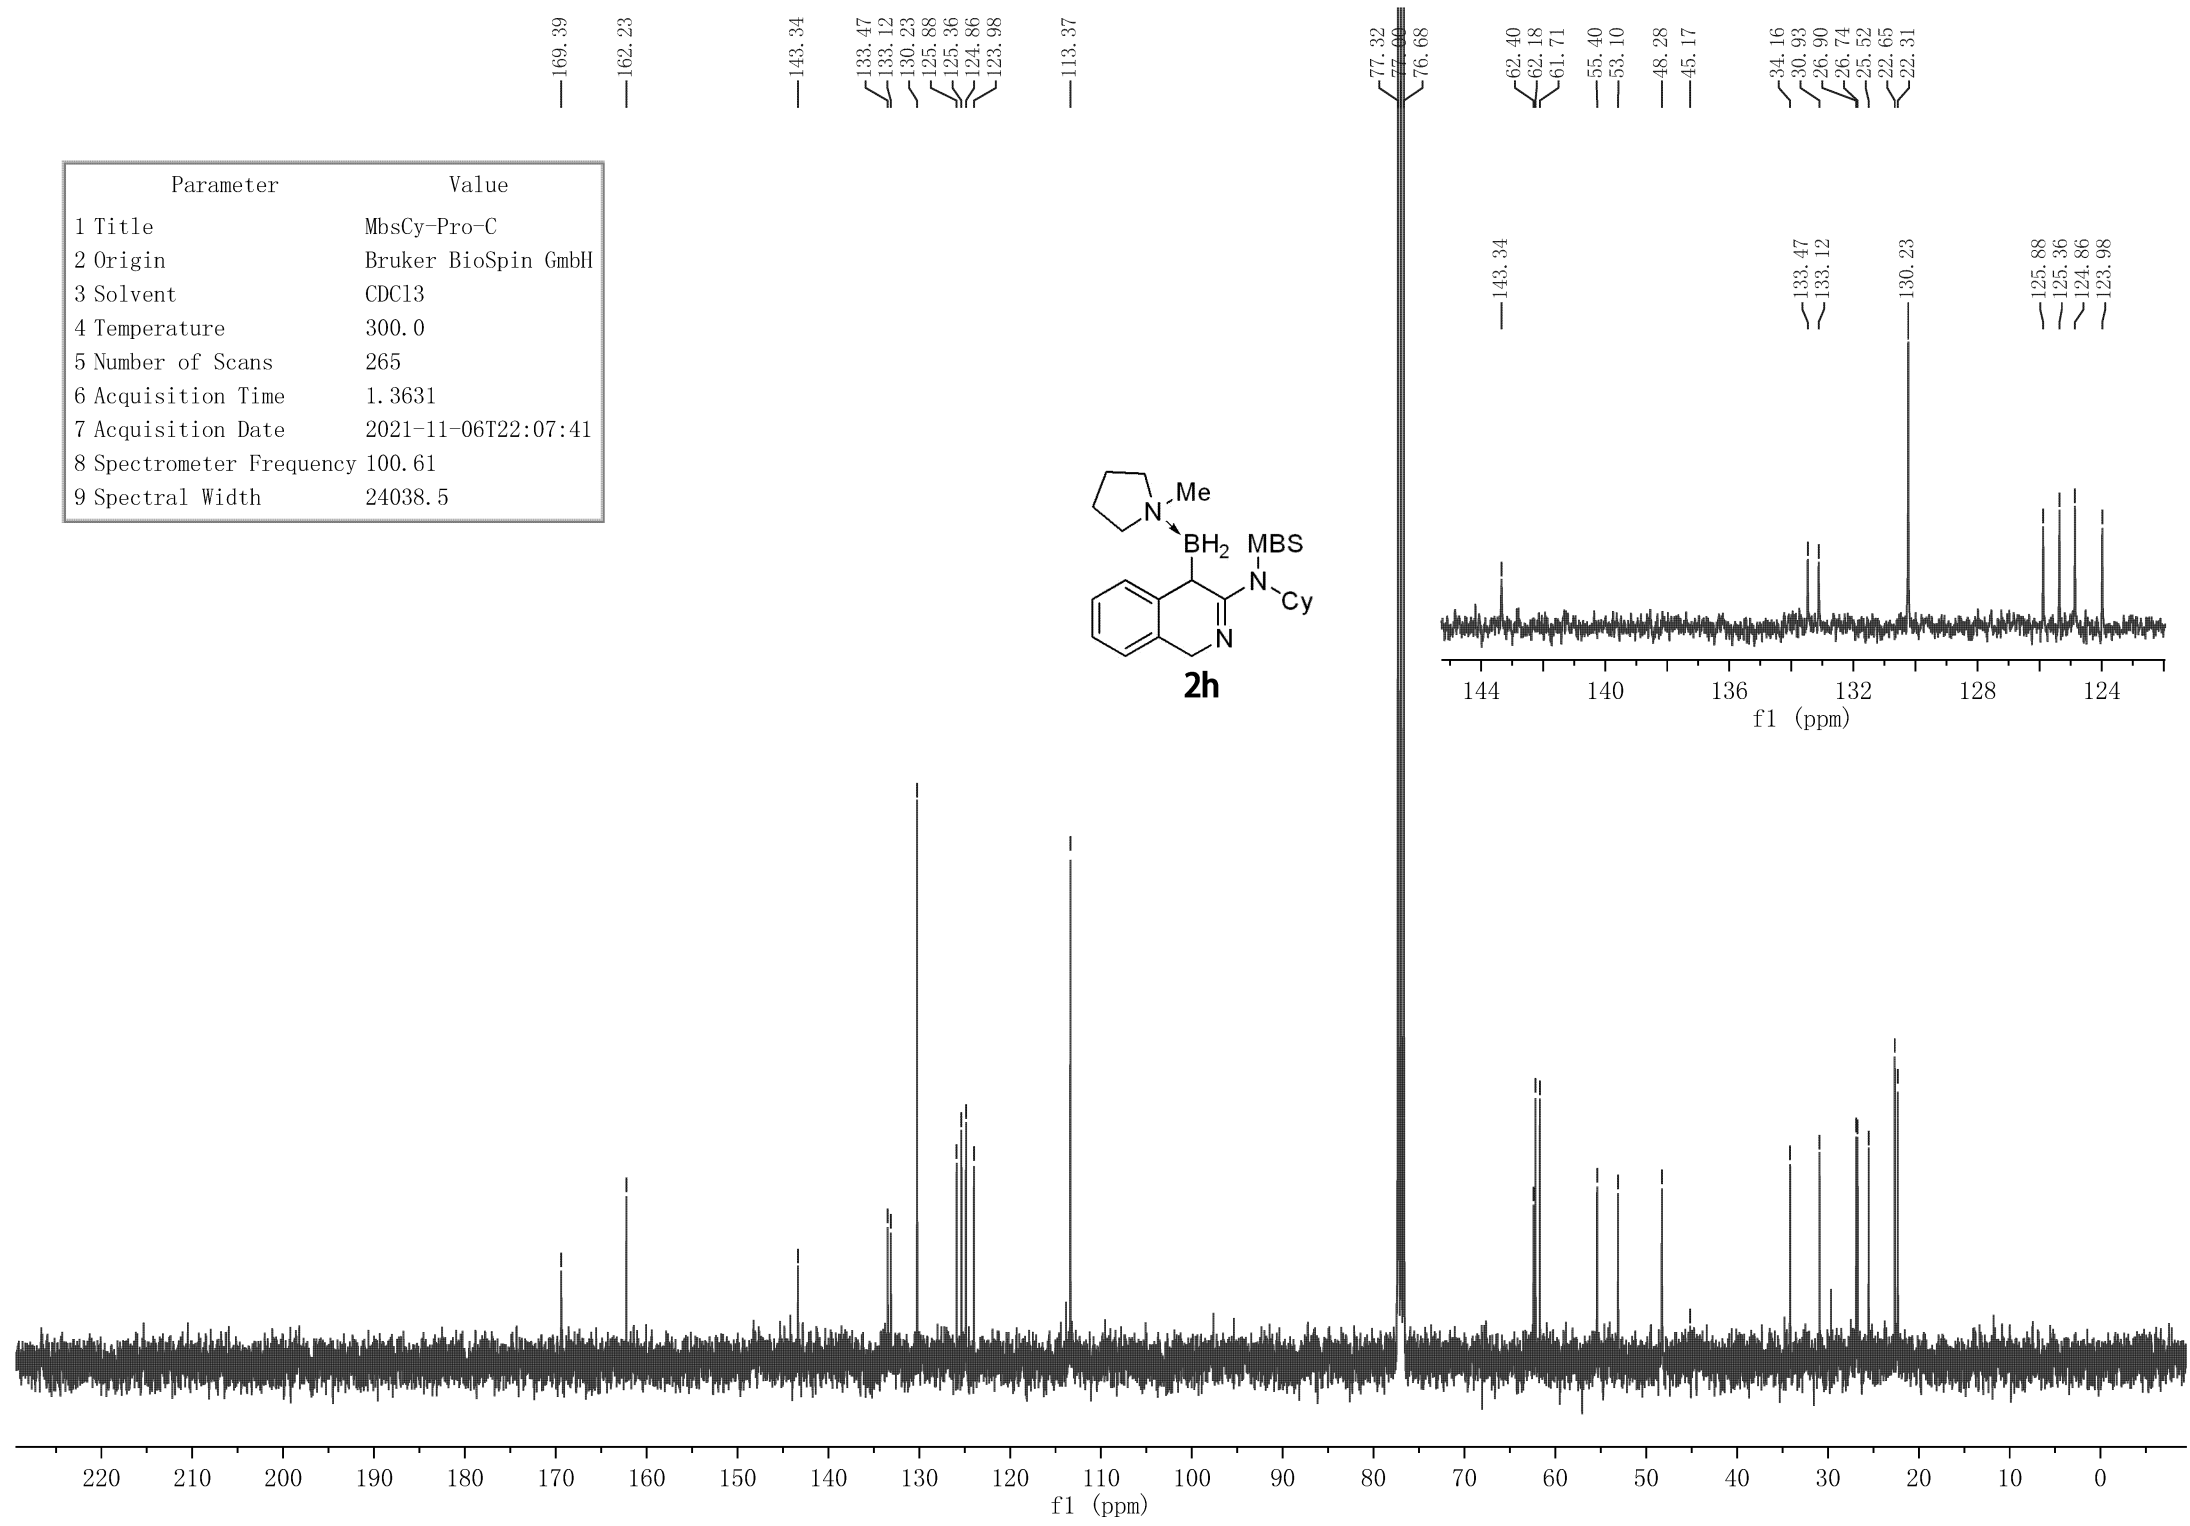

| Parameter                | Value               |
|--------------------------|---------------------|
| 1 Title                  | MbsBn-Pro-1H        |
| 2 Origin                 | Bruker BioSpin GmbH |
| 3 Solvent                | CDCl3               |
| 4 Temperature            | 298.0               |
| 5 Number of Scans        | 11                  |
| 6 Acquisition Time       | 4.0894              |
| 7 Acquisition Date       | 2021-10-17T18:20:29 |
| 8 Spectrometer Frequency | 400.13              |
| 9 Spectral Width         | 8012.8              |

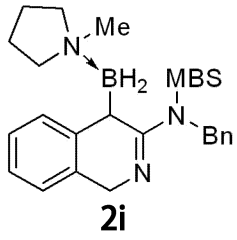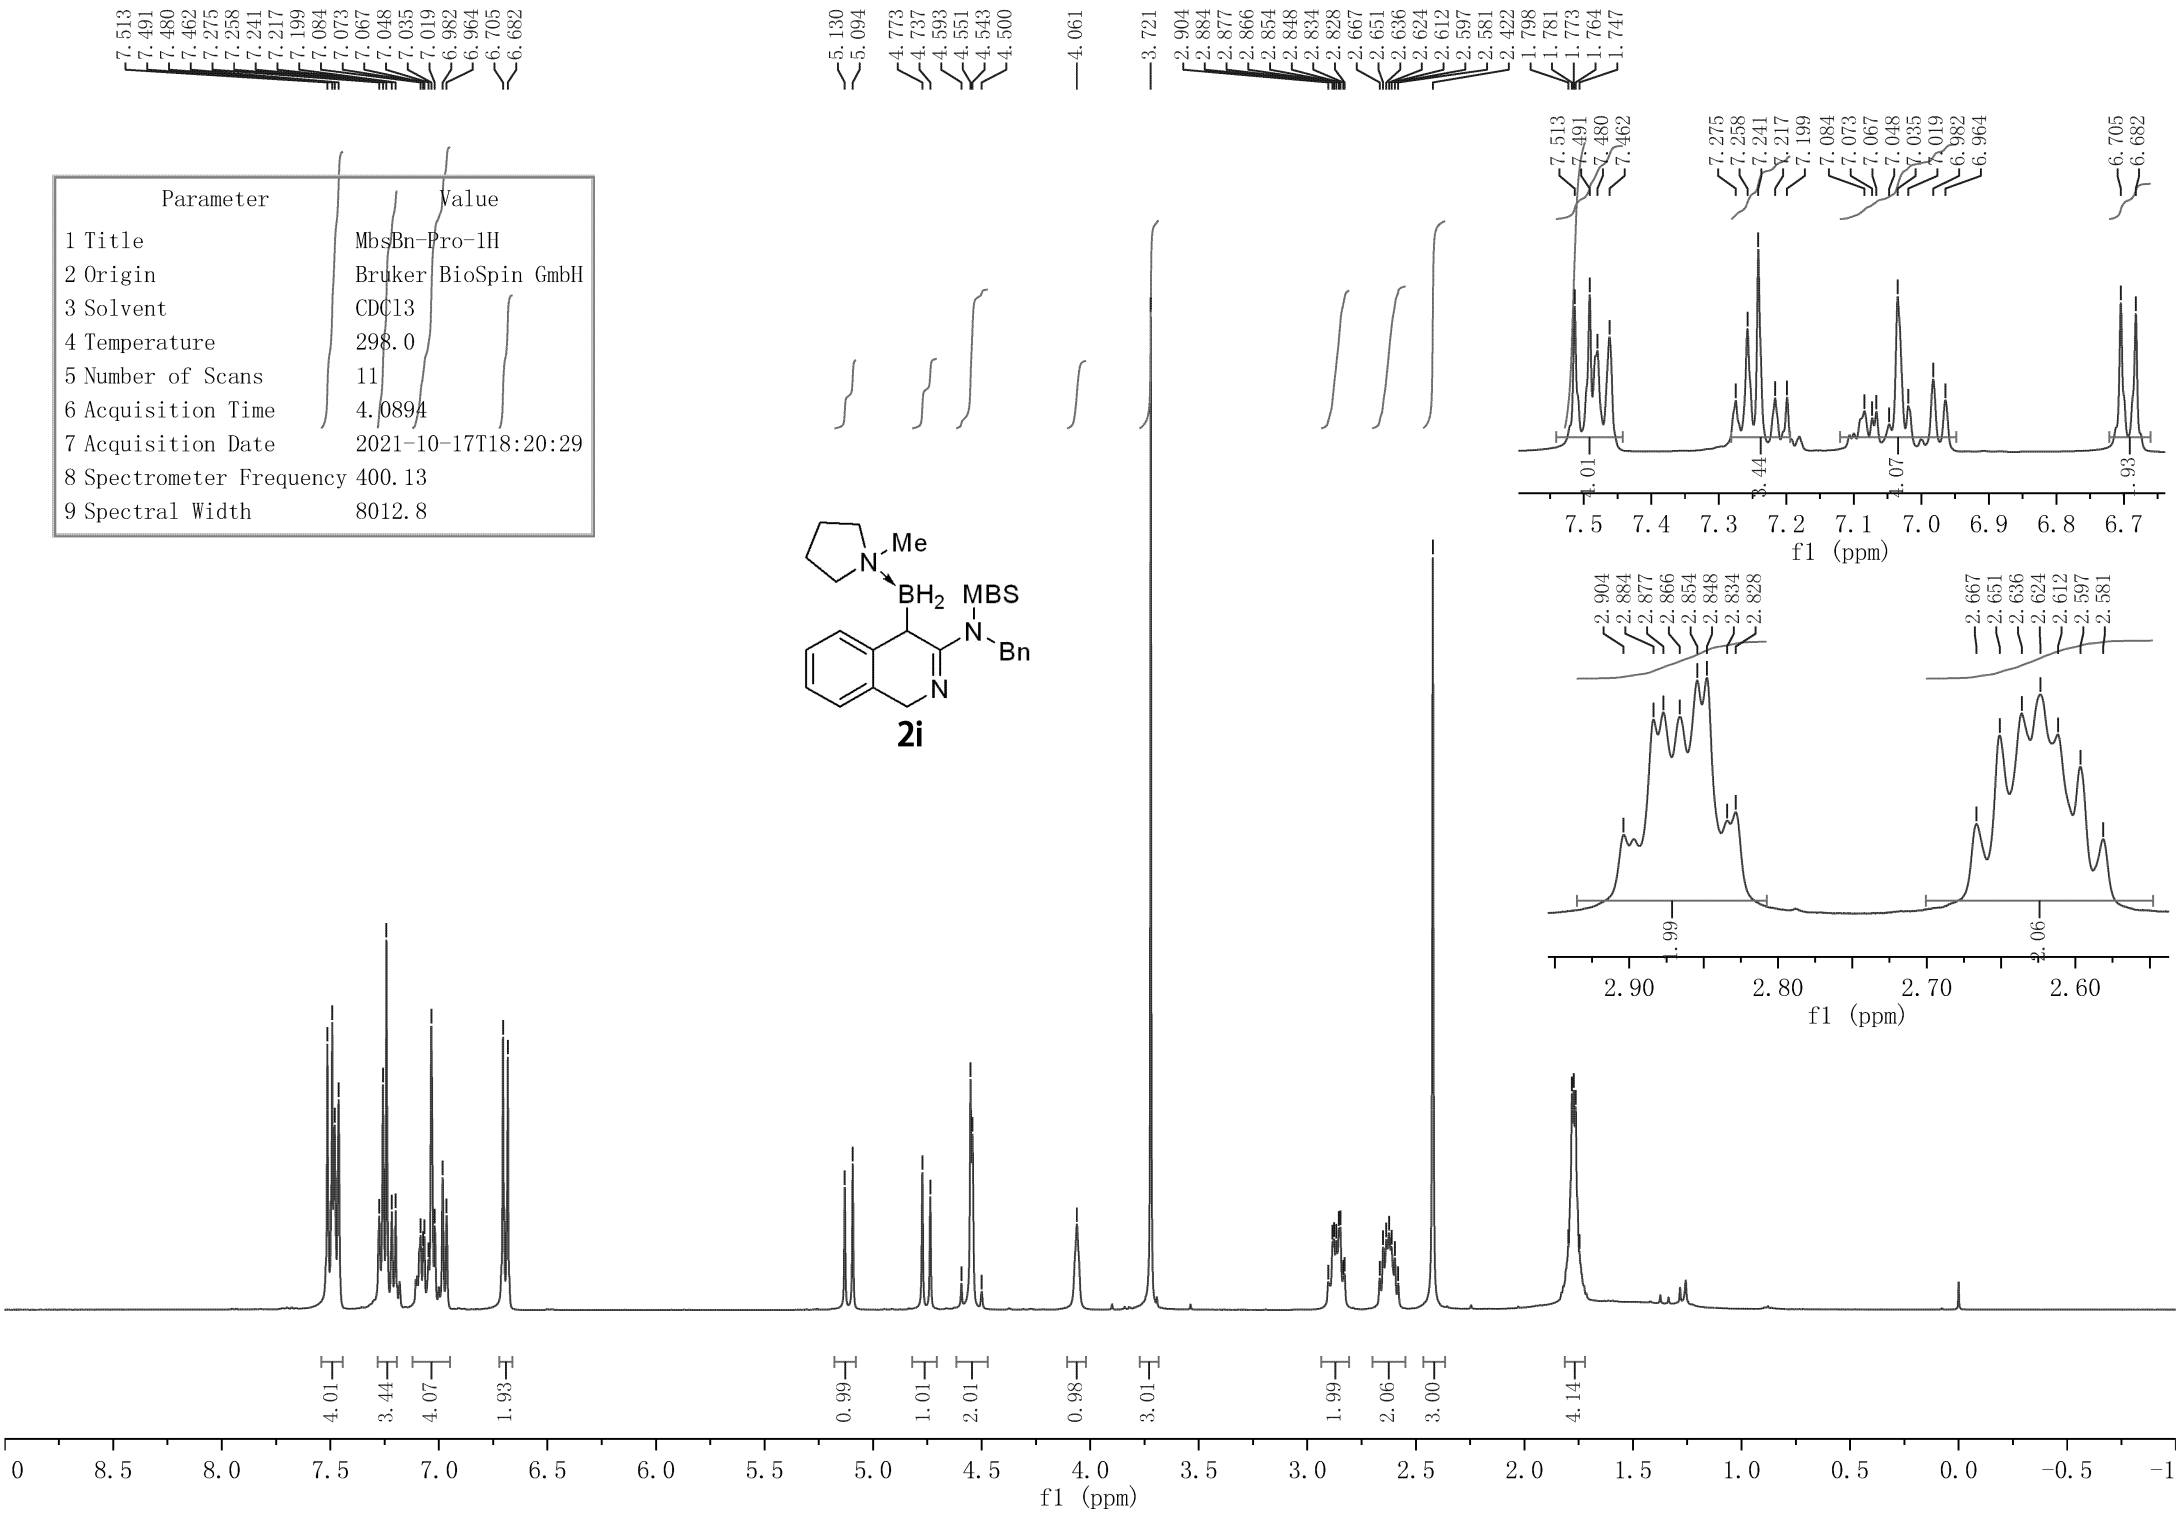

| Parameter                | Value               |
|--------------------------|---------------------|
| 1 Title                  | MbsBn-Pro-C         |
| 2 Origin                 | Bruker BioSpin GmbH |
| 3 Solvent                | CDC13               |
| 4 Temperature            | 300.0               |
| 5 Number of Scans        | 11                  |
| 6 Acquisition Time       | 1.3631              |
| 7 Acquisition Date       | 2021-10-16T17:38:41 |
| 8 Spectrometer Frequency | 100.61              |
| 9 Spectral Width         | 24038.5             |

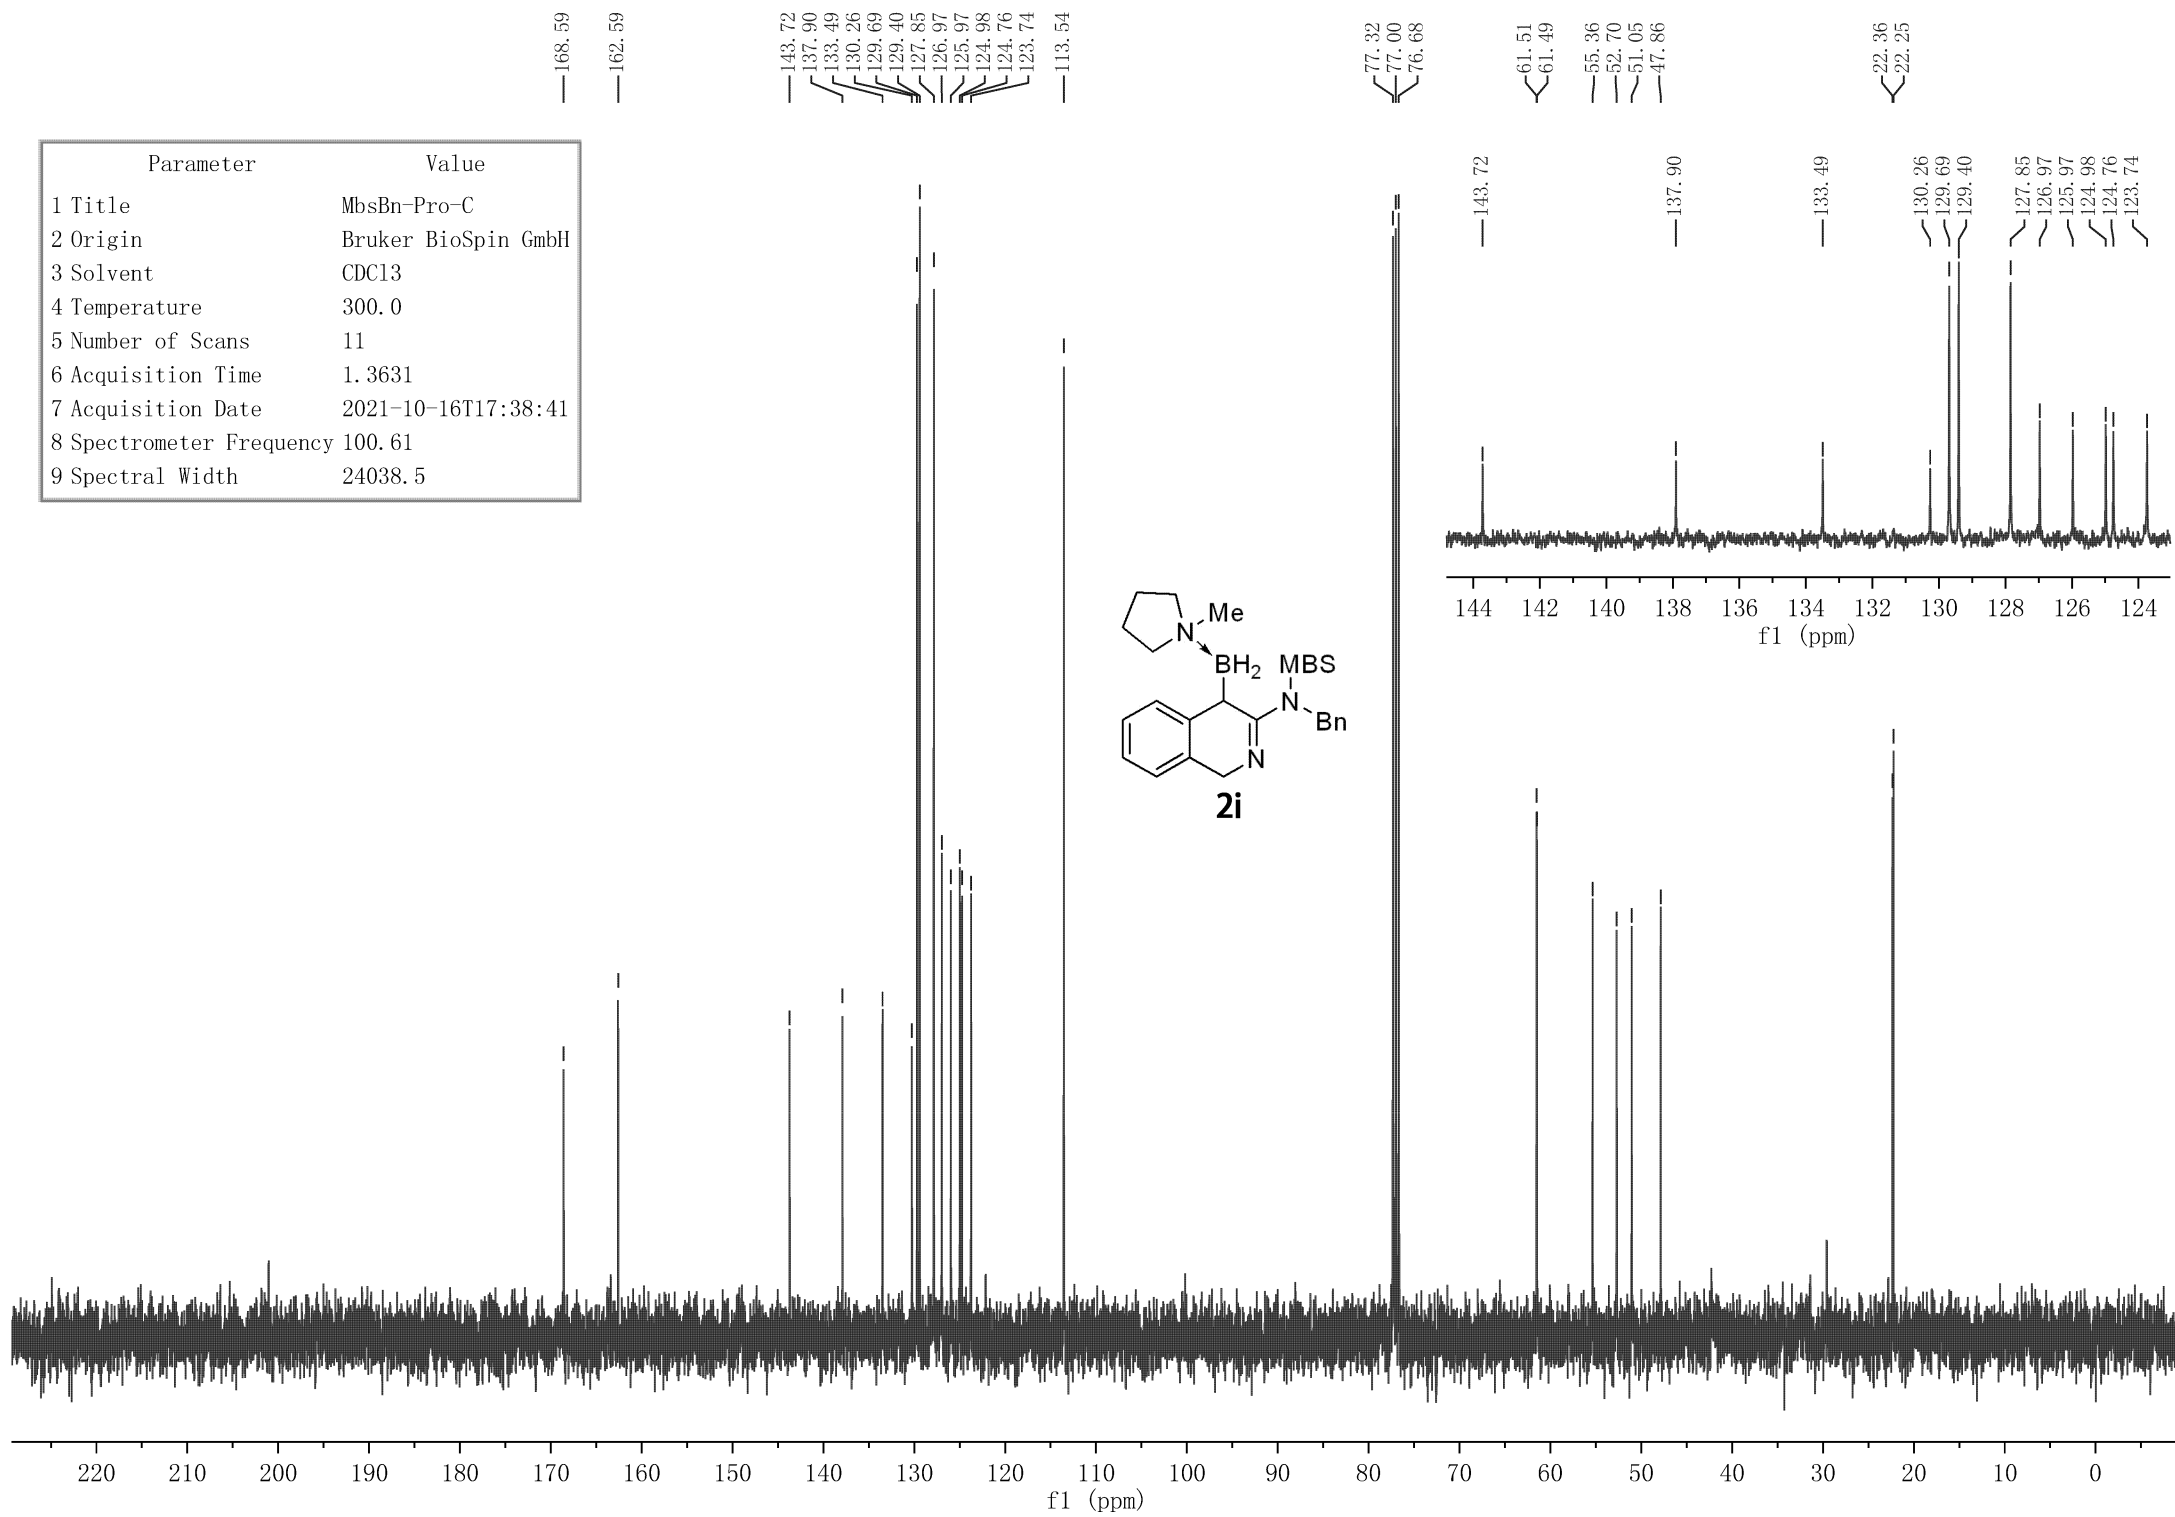

| Parameter                | Value                     |
|--------------------------|---------------------------|
| 1 Title                  | MbsPh <sub>7</sub> Pro-1H |
| 2 Origin                 | Bruker BioSpin GmbH       |
| 3 Solvent                | CDCl <sub>3</sub>         |
| 4 Temperature            | 298.0                     |
| 5 Number of Scans        | 7                         |
| 6 Acquisition Time       | 4.0894                    |
| 7 Acquisition Date       | 2021-10-16T17:24:44       |
| 8 Spectrometer Frequency | 400.13                    |
| 9 Spectral Width         | 8012.8                    |

7.730  
7.708  
7.433  
7.415  
7.397  
7.375  
7.355  
7.338  
7.151  
7.139  
7.130  
7.121  
7.081  
7.073  
7.067  
7.059  
6.871  
6.746  
6.738  
6.733  
6.725

4.815

3.828  
3.030  
3.021  
3.001  
2.980  
2.861  
2.846  
2.832  
2.760  
2.750  
2.740  
2.730  
2.625  
2.609  
2.594  
2.580  
2.382  
2.377  
1.903  
1.894  
1.889  
1.875  
1.867  
1.858  
1.840  
1.830

7.730  
7.708  
7.433  
7.415  
7.397  
7.375  
7.355  
7.338  
7.151  
7.139  
7.130  
7.121  
7.081  
7.073  
7.067  
7.059  
6.893  
6.871  
6.746  
6.738  
6.733  
6.725

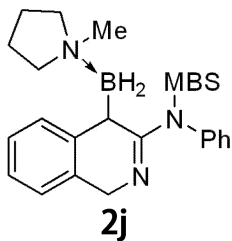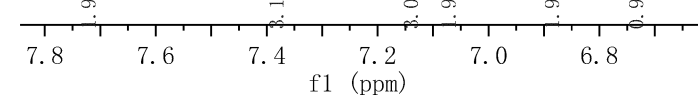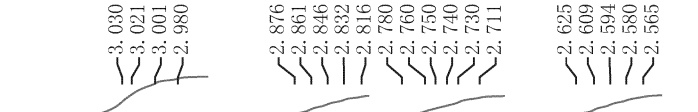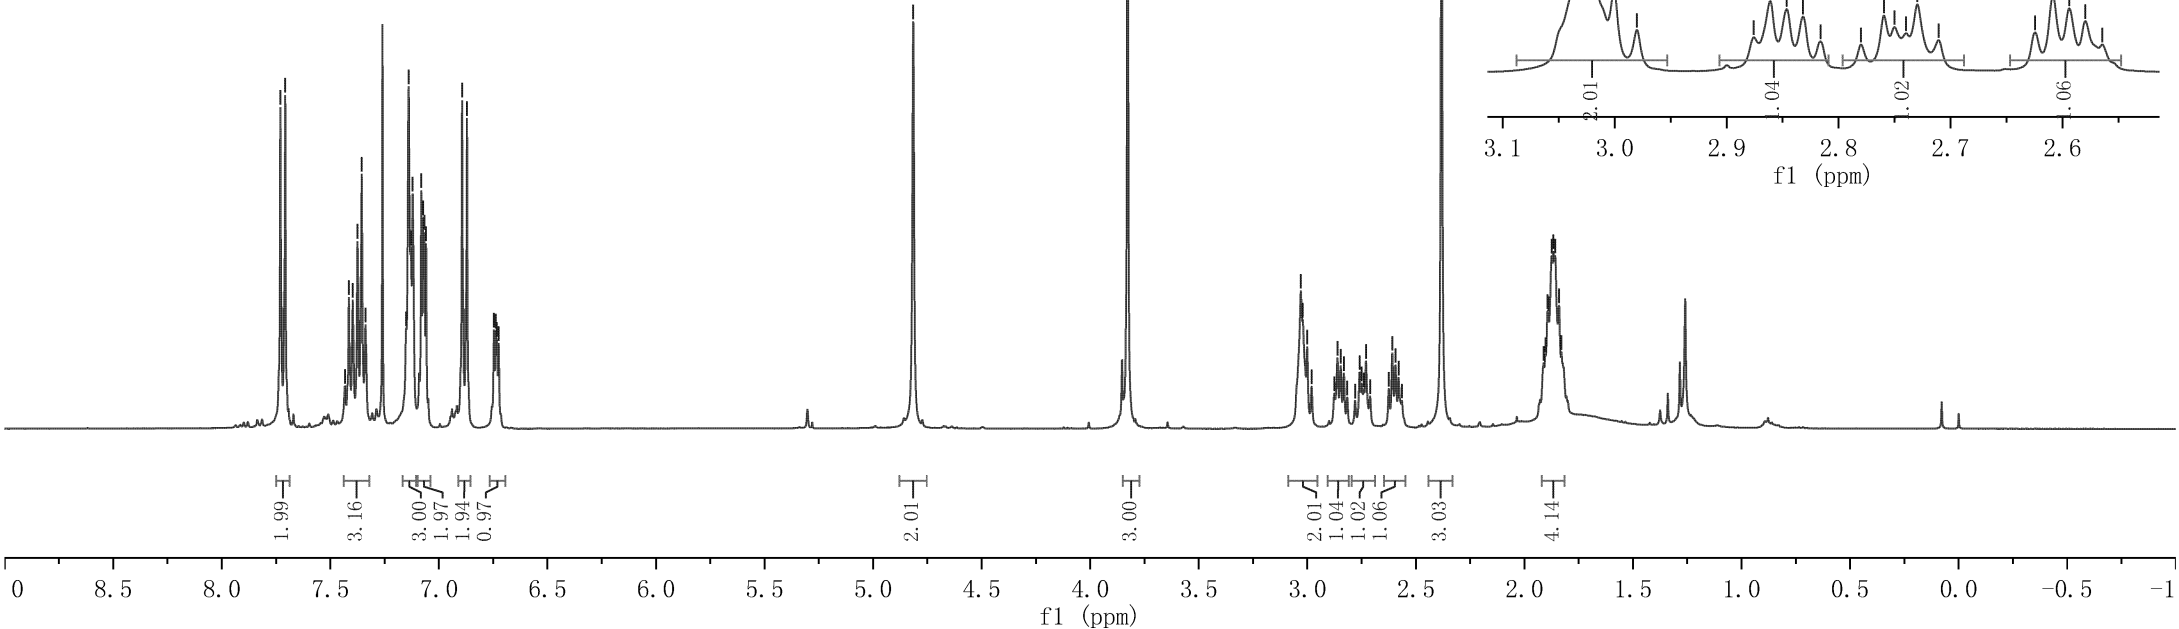

| Parameter                | Value               |
|--------------------------|---------------------|
| 1 Title                  | MbsPh-Pro-C         |
| 2 Origin                 | Bruker BioSpin GmbH |
| 3 Solvent                | CDC13               |
| 4 Temperature            | 300.0               |
| 5 Number of Scans        | 54                  |
| 6 Acquisition Time       | 1.3631              |
| 7 Acquisition Date       | 2021-10-16T17:26:20 |
| 8 Spectrometer Frequency | 100.61              |
| 9 Spectral Width         | 24038.5             |

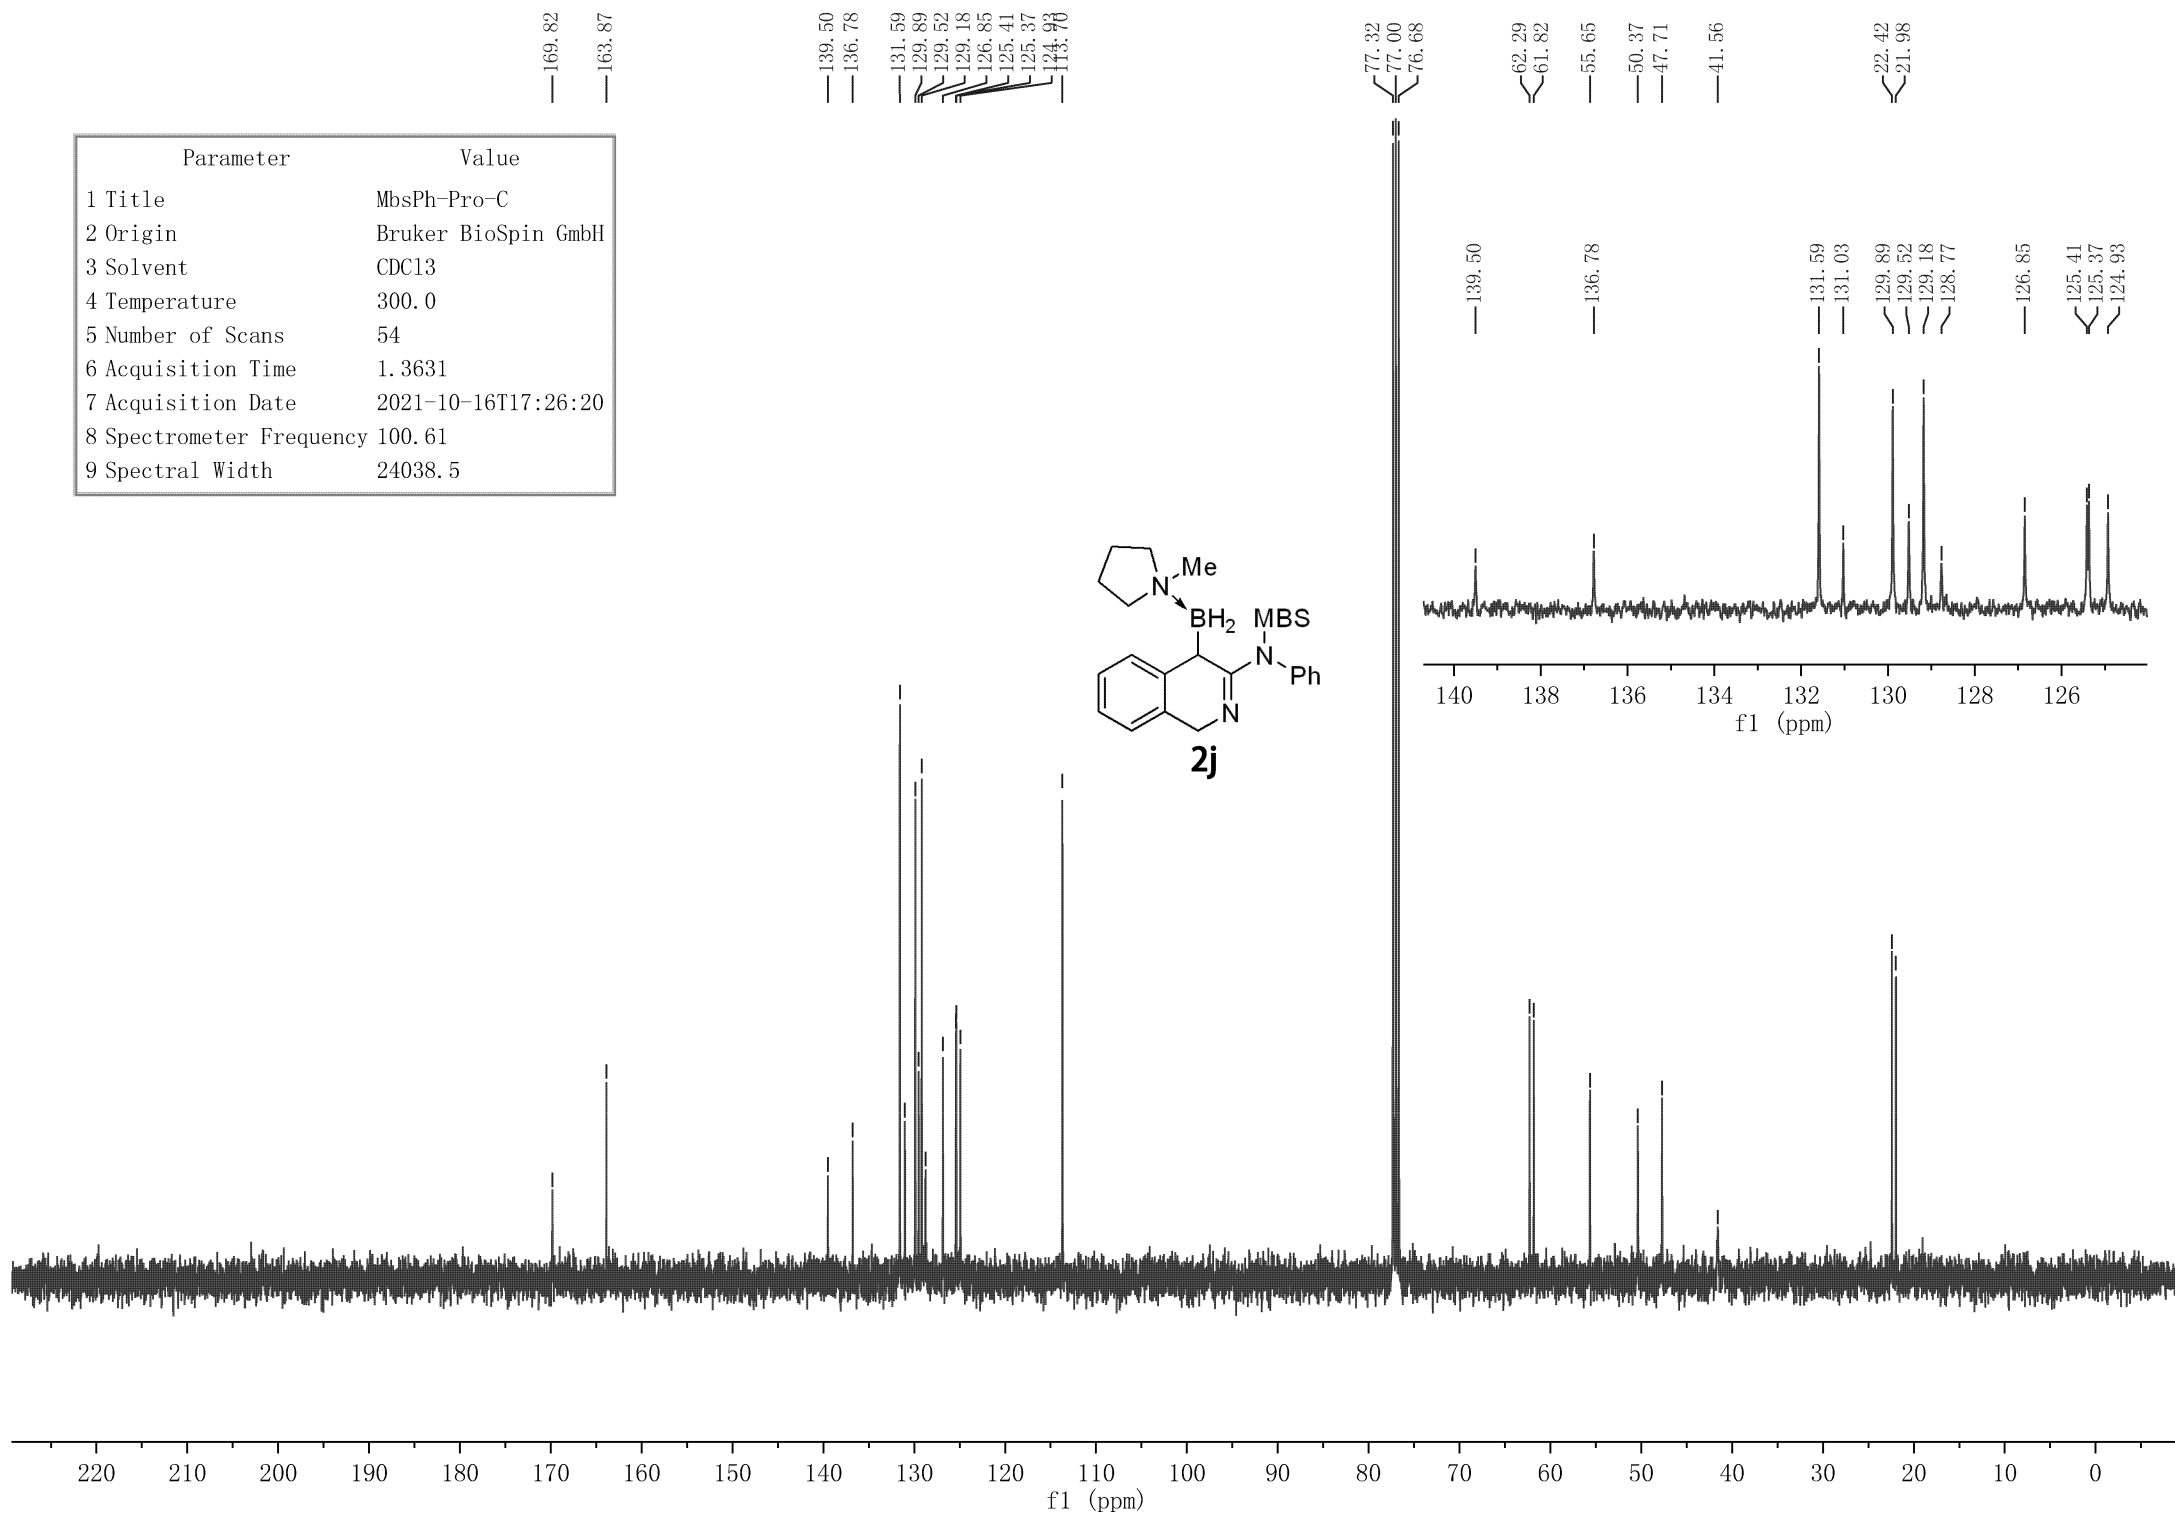

| Parameter                | Value               |
|--------------------------|---------------------|
| 1 Title                  | 4-F-Pro-IH          |
| 2 Origin                 | Bruker BioSpin GmbH |
| 3 Solvent                | CDC13               |
| 4 Temperature            | 298.0               |
| 5 Number of Scans        | 7                   |
| 6 Acquisition Time       | 4.0894              |
| 7 Acquisition Date       | 2021-10-07T16:21:50 |
| 8 Spectrometer Frequency | 400.13              |
| 9 Spectral Width         | 8012.8              |

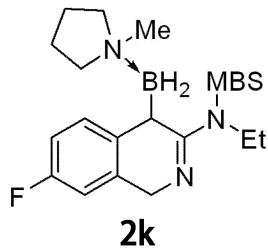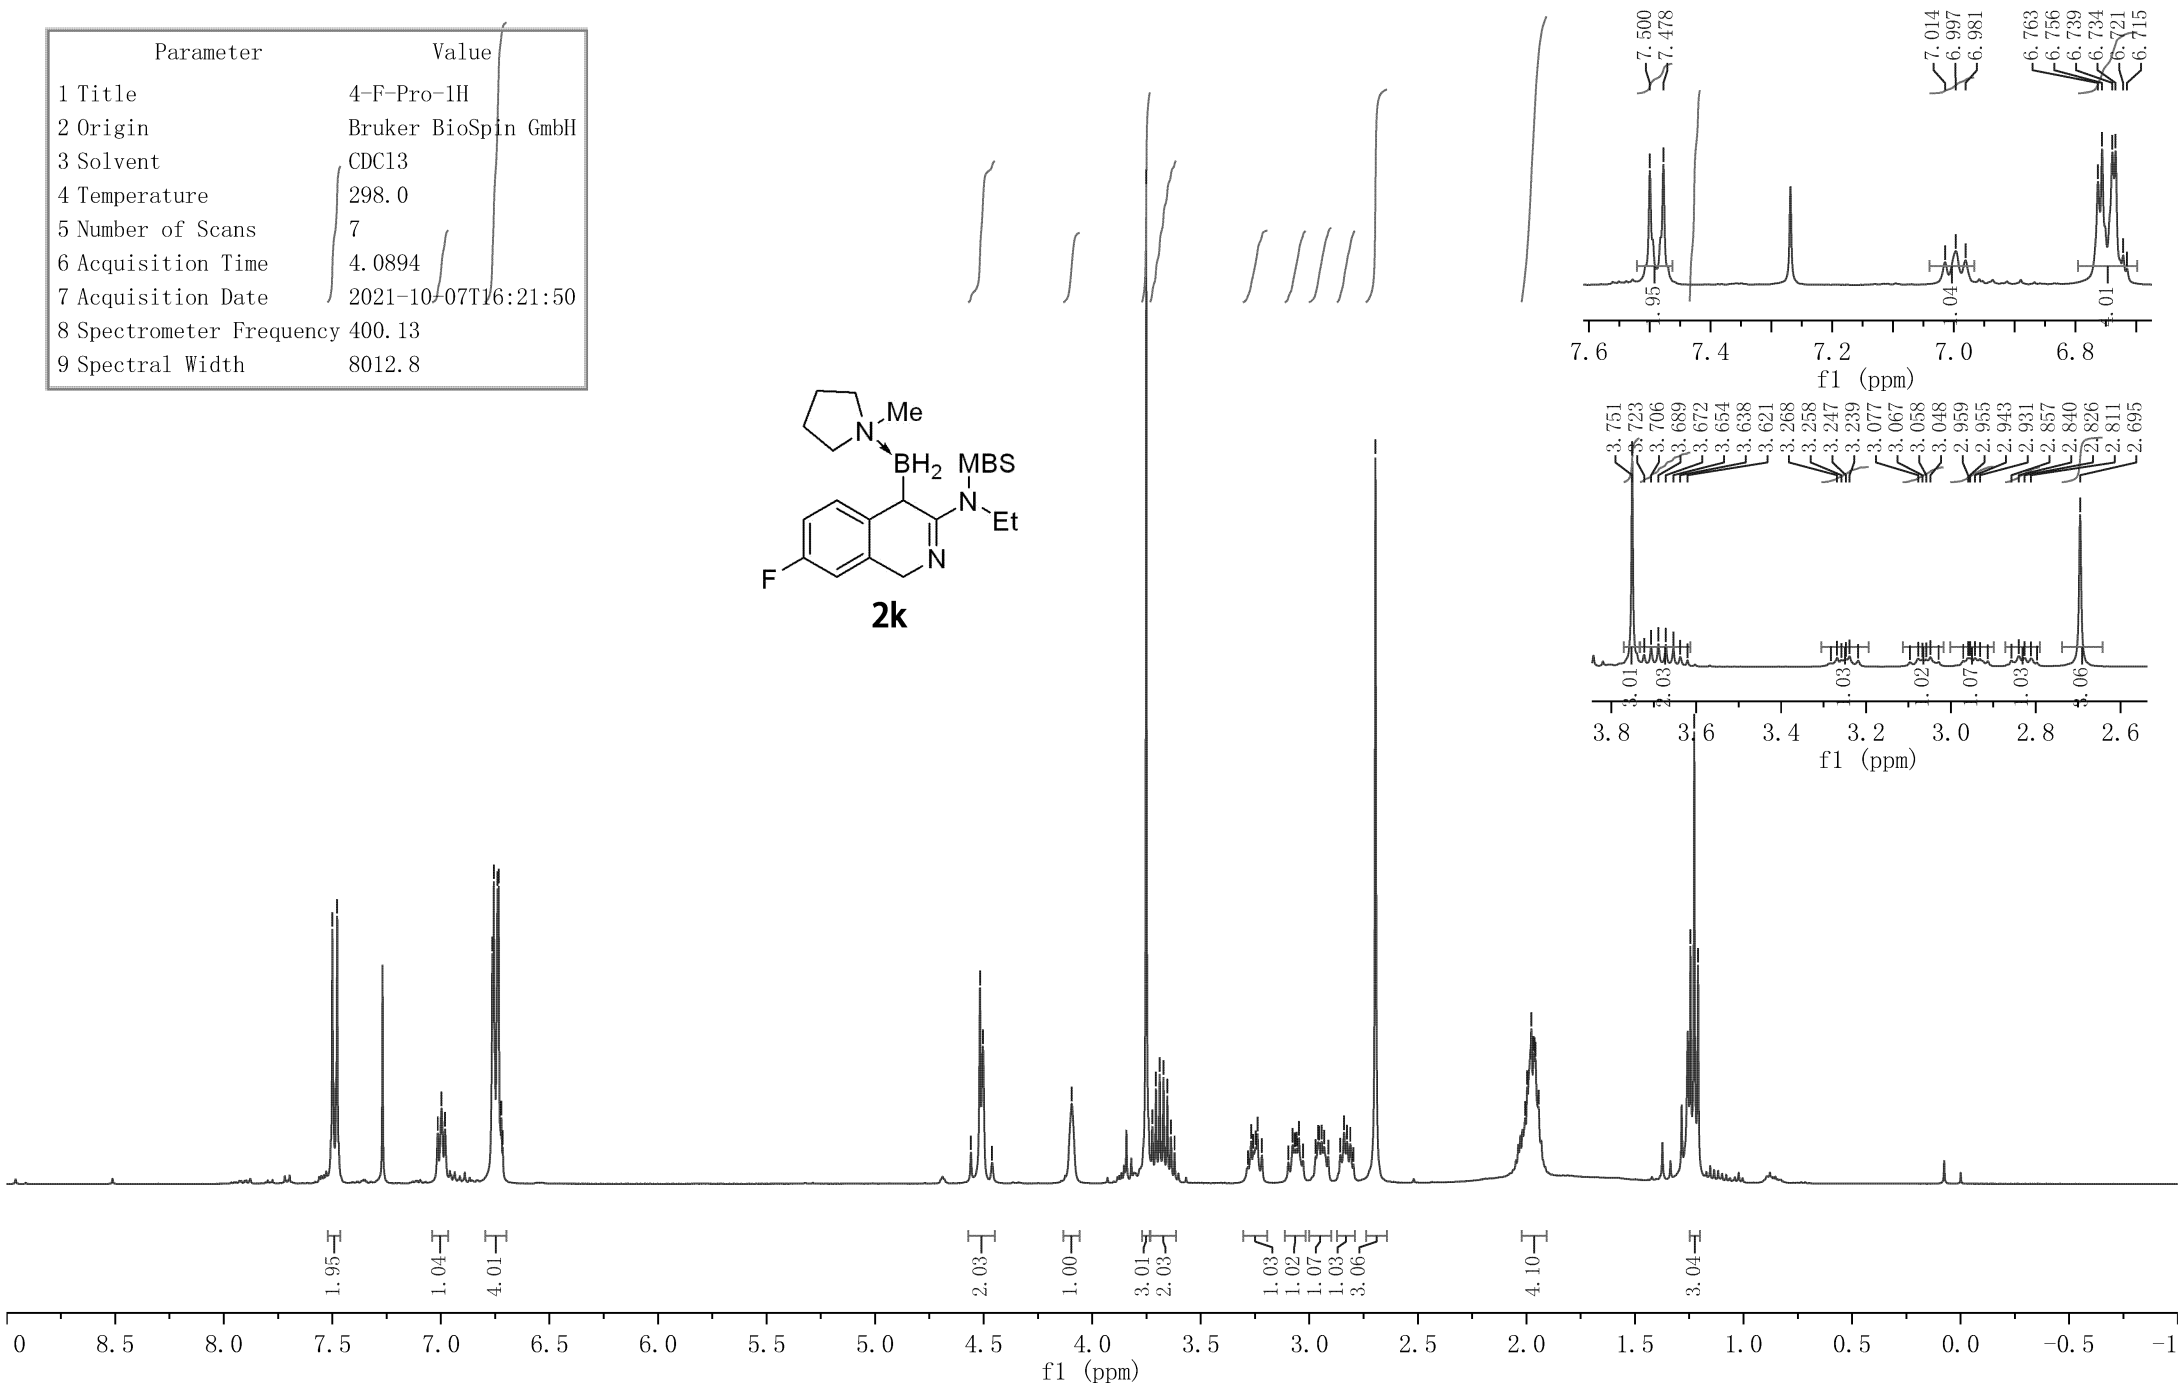



| Parameter                | Value               |
|--------------------------|---------------------|
| 1 Title                  | 4-F-Pro-C           |
| 2 Origin                 | Bruker BioSpin GmbH |
| 3 Solvent                | CDCl3               |
| 4 Temperature            | 300.0               |
| 5 Number of Scans        | 27                  |
| 6 Acquisition Time       | 1.3631              |
| 7 Acquisition Date       | 2021-10-07T16:23:11 |
| 8 Spectrometer Frequency | 100.61              |
| 9 Spectral Width         | 24038.5             |

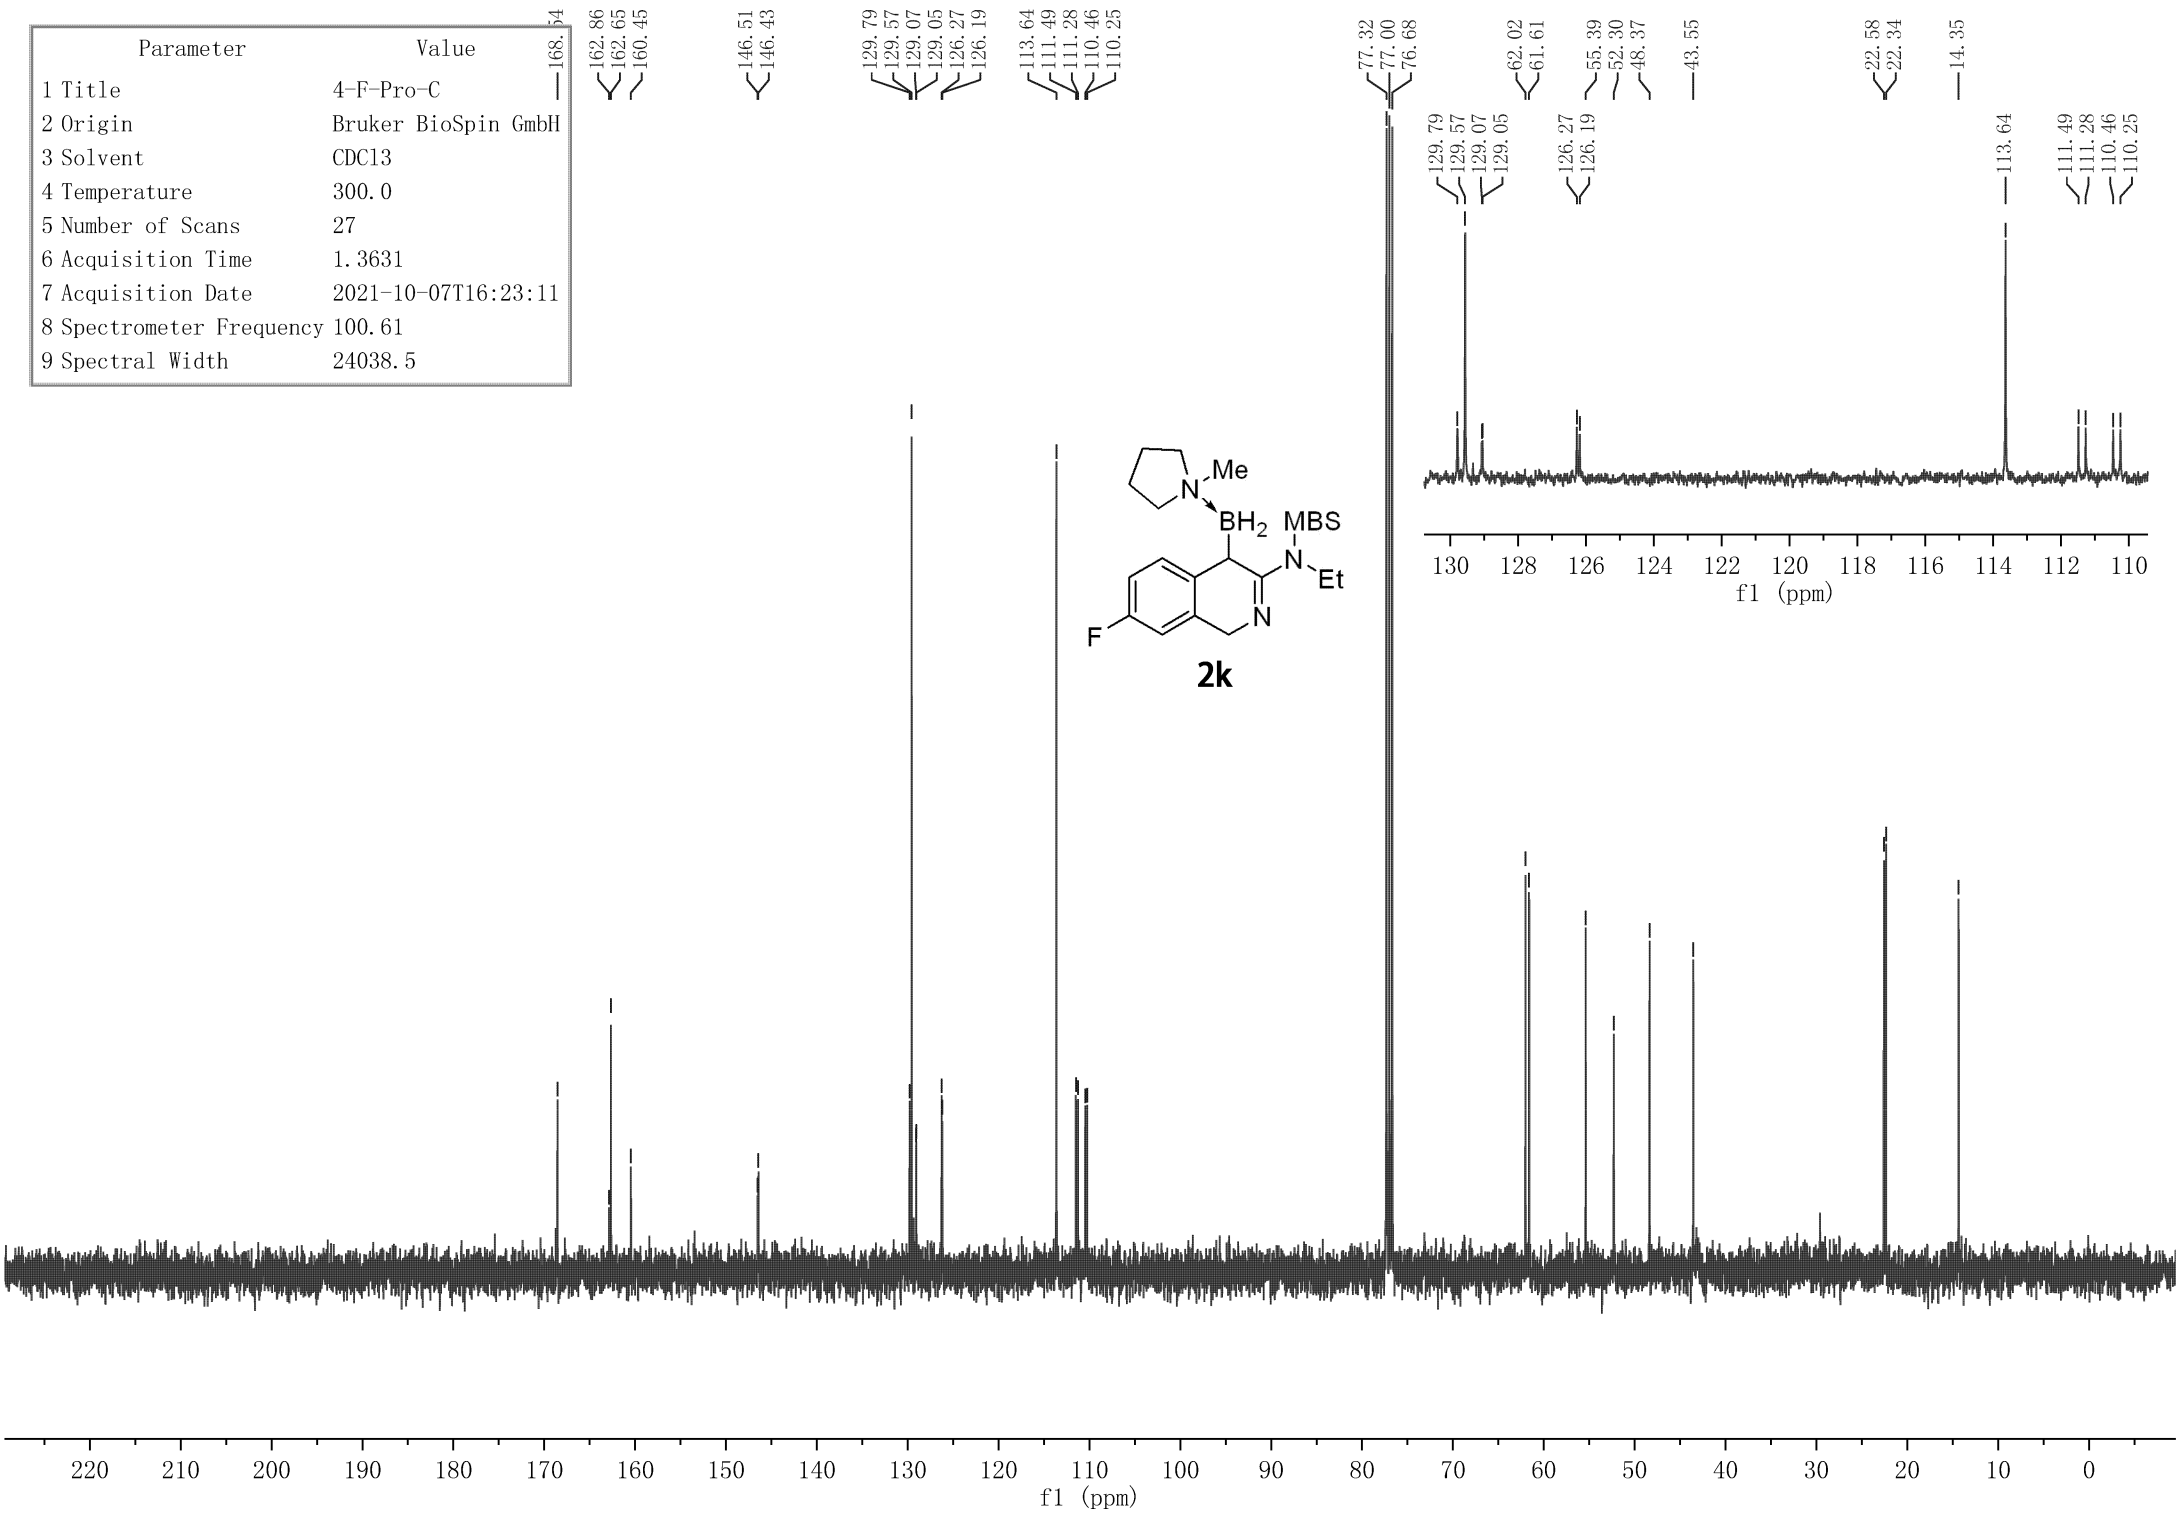

| Parameter                | Value               |
|--------------------------|---------------------|
| 1 Title                  | zgy-9-2k-F          |
| 2 Origin                 | Bruker BioSpin GmbH |
| 3 Solvent                | CDCl3               |
| 4 Temperature            | 295.2               |
| 5 Number of Scans        | 12                  |
| 6 Acquisition Time       | 0.7340              |
| 7 Acquisition Date       | 2022-01-21T14:32:44 |
| 8 Spectrometer Frequency | 376.31              |
| 9 Spectral Width         | 89285.7             |

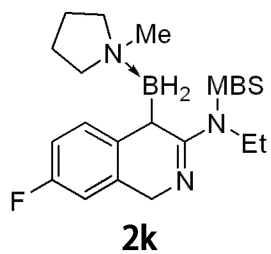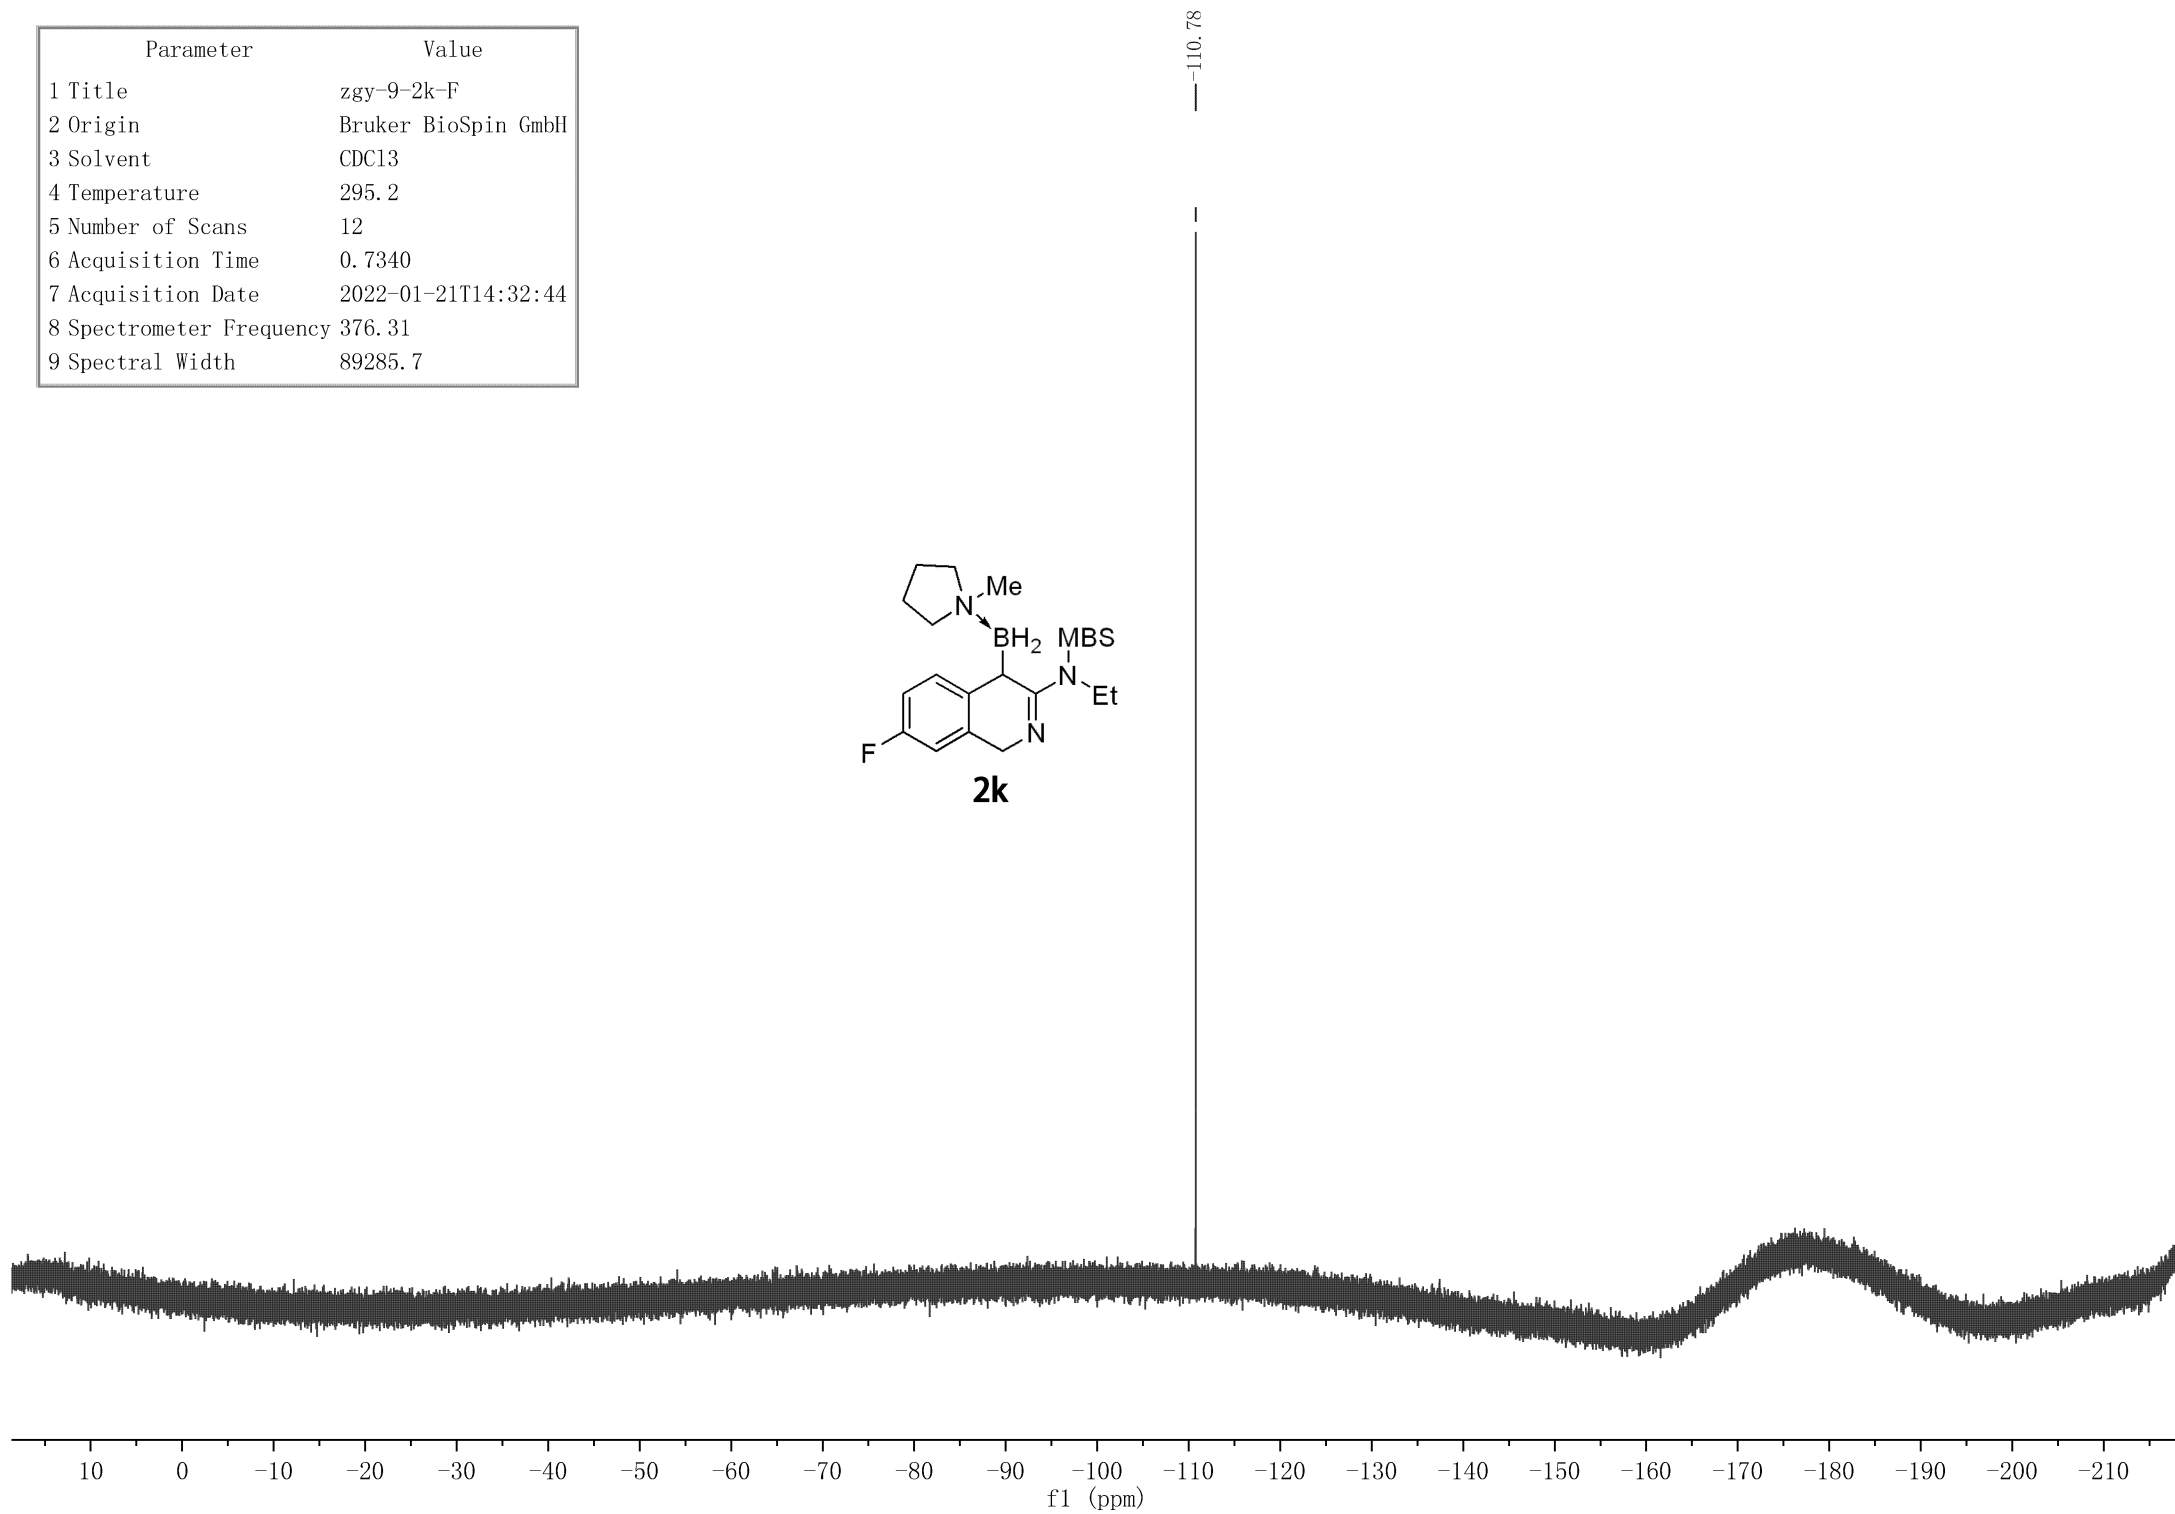

| Parameter                | Value               |
|--------------------------|---------------------|
| 1 Title                  | 4-Cl-Pro-1H         |
| 2 Origin                 | Bruker BioSpin GmbH |
| 3 Solvent                | CDCl3               |
| 4 Temperature            | 298.0               |
| 5 Number of Scans        | 8                   |
| 6 Acquisition Time       | 4.0894              |
| 7 Acquisition Date       | 2021-09-20T14:52:47 |
| 8 Spectrometer Frequency | 400.13              |
| 9 Spectral Width         | 8012.8              |

7.489  
7.467  
7.092  
7.087  
7.064  
6.985  
6.965  
6.763  
6.742

4.519  
4.115  
3.761  
3.713  
3.696  
3.679  
3.665  
3.648  
3.260  
3.230  
3.045  
3.015  
2.949  
2.943  
2.931  
2.805  
2.791  
2.775  
2.679  
2.629  
2.011  
1.999  
1.965  
1.957  
1.946

1.241  
1.224  
1.206

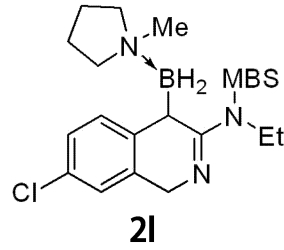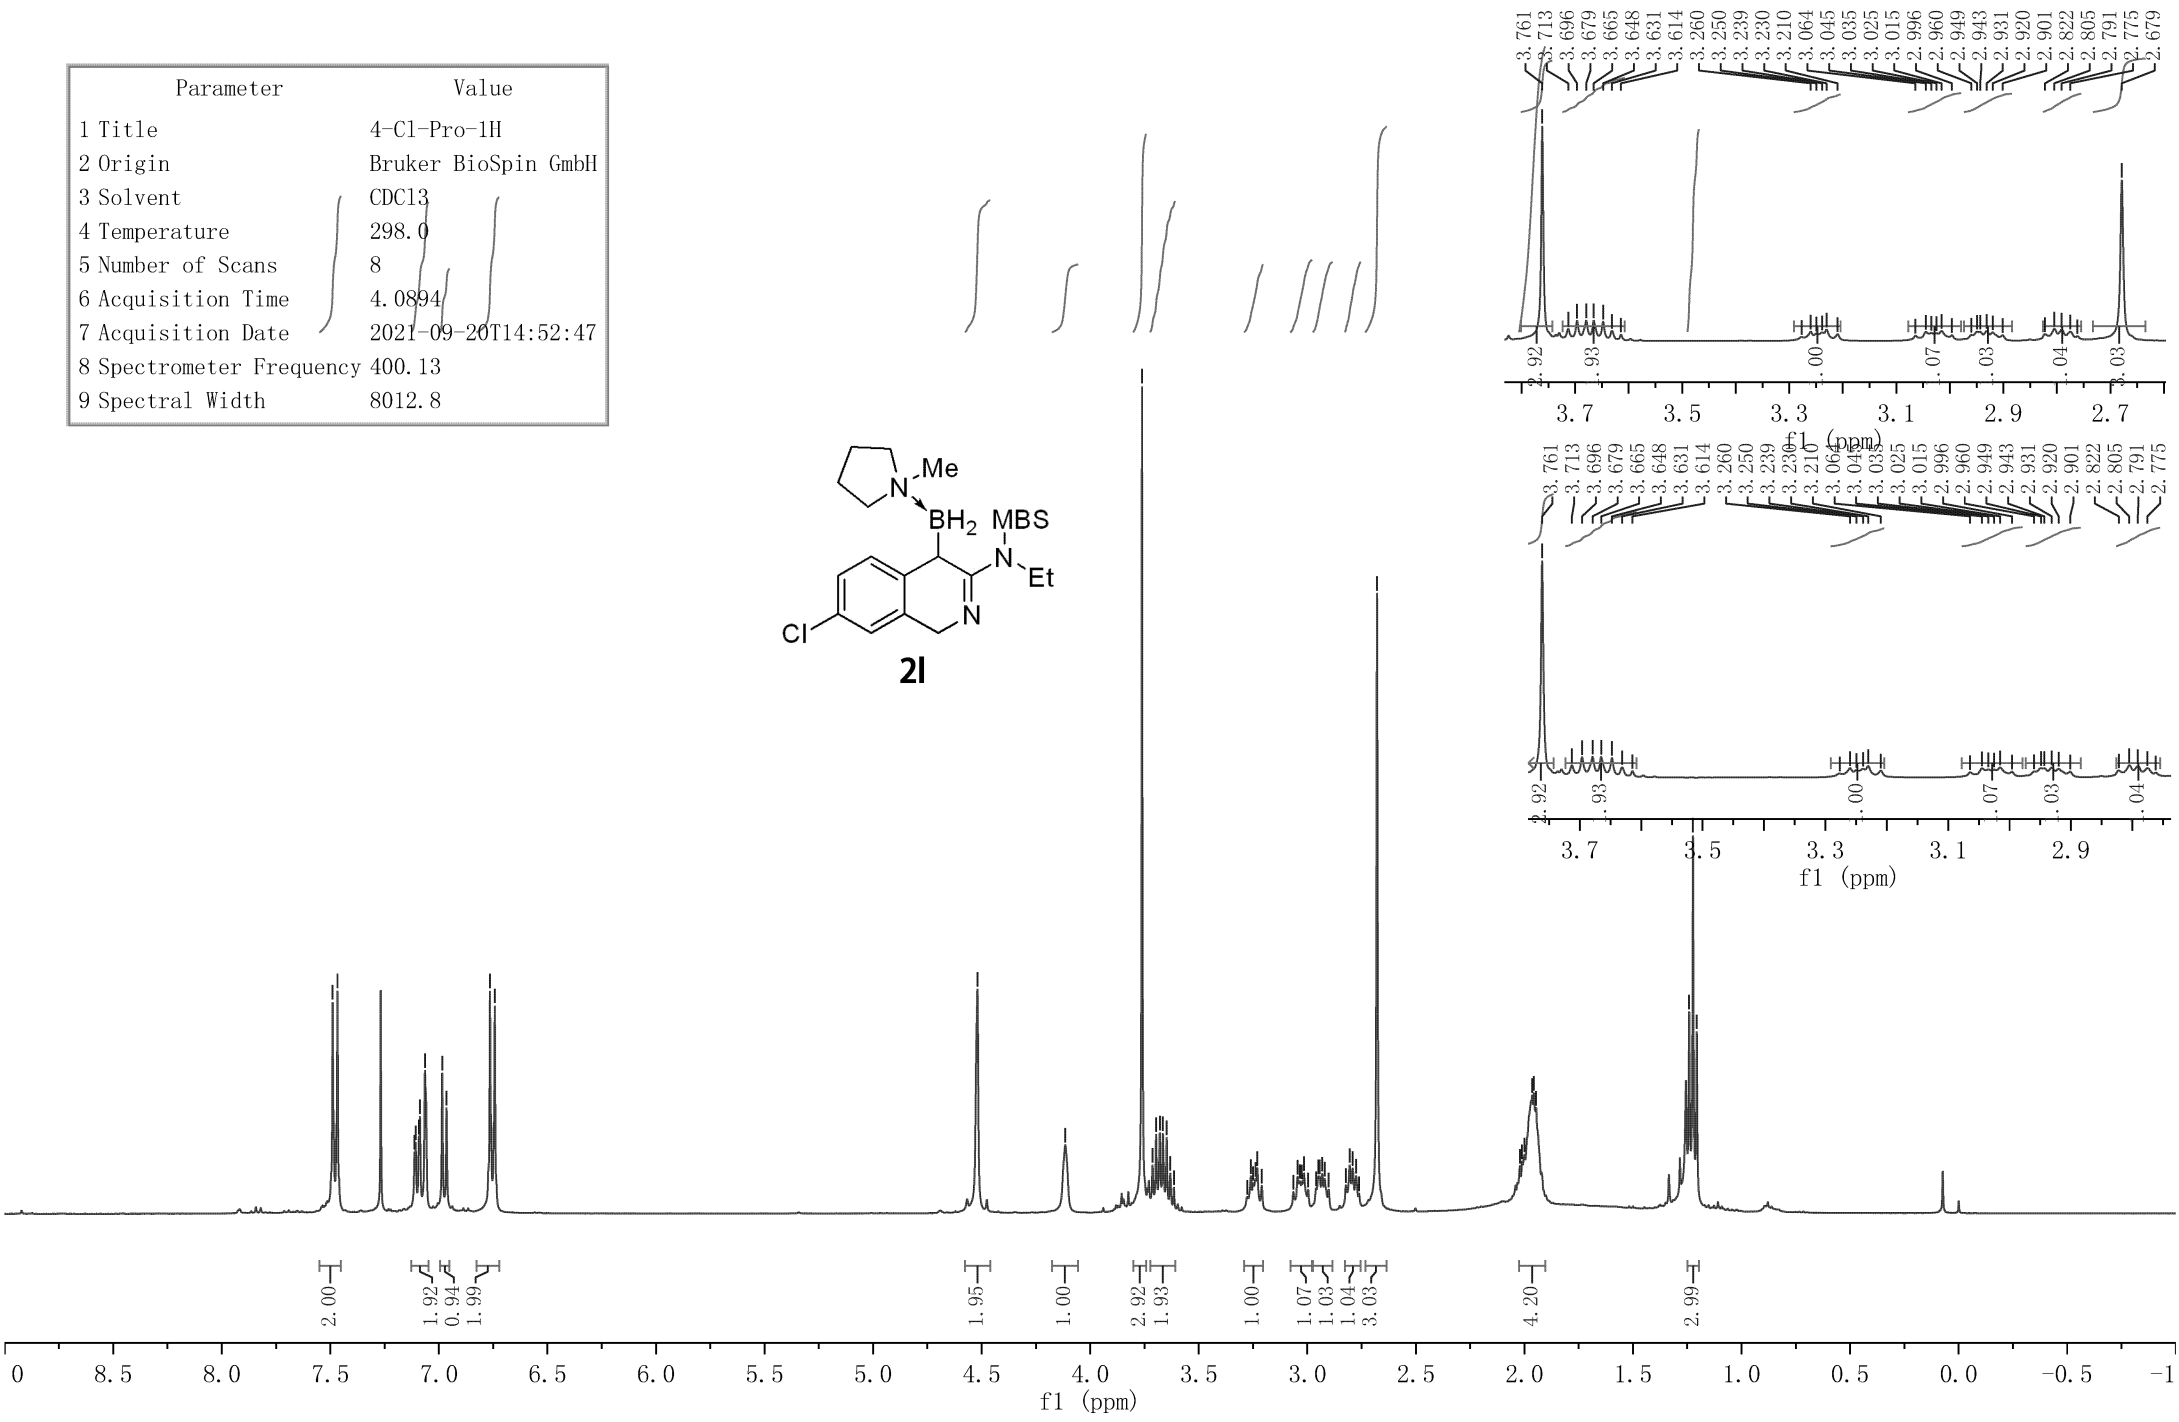

| Parameter                | Value               |
|--------------------------|---------------------|
| 1 Title                  | 4-Cl-Pro-C          |
| 2 Origin                 | Bruker BioSpin GmbH |
| 3 Solvent                | CDCl3               |
| 4 Temperature            | 300.0               |
| 5 Number of Scans        | 24                  |
| 6 Acquisition Time       | 1.3631              |
| 7 Acquisition Date       | 2021-09-20T14:54:13 |
| 8 Spectrometer Frequency | 100.61              |
| 9 Spectral Width         | 24038.5             |

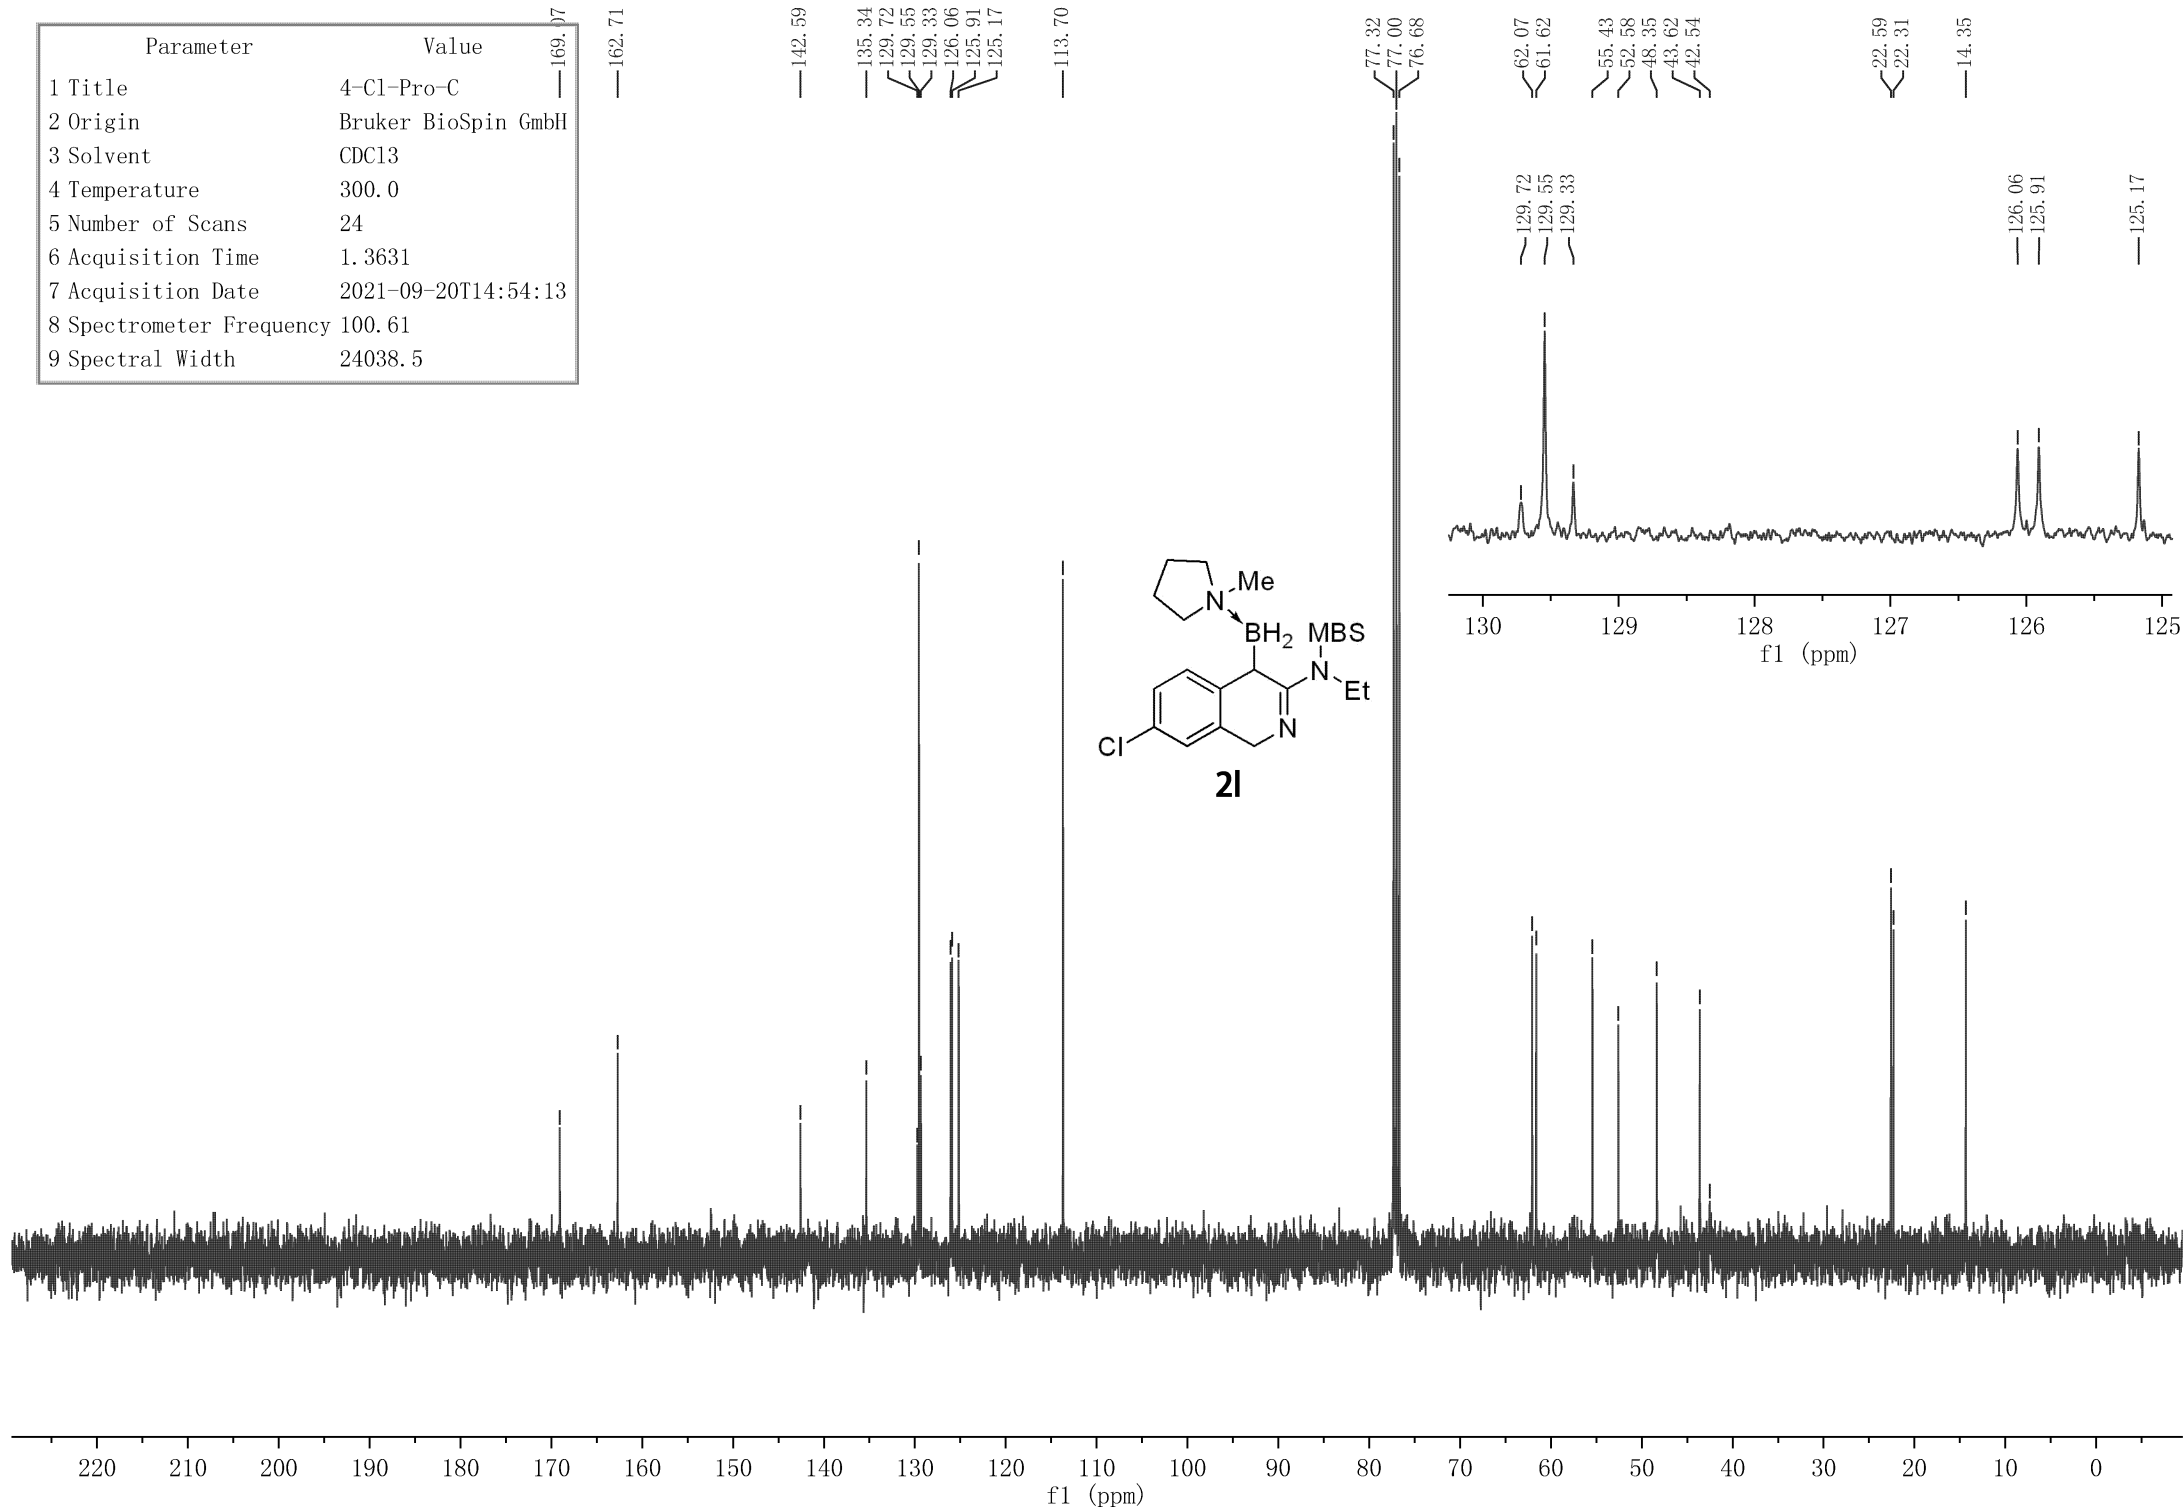

| Parameter                | Value               |
|--------------------------|---------------------|
| 1 Title                  | 4-Br-Pro-1H         |
| 2 Origin                 | Bruker BioSpin GmbH |
| 3 Solvent                | CDC13               |
| 4 Temperature            | 298.0               |
| 5 Number of Scans        | 8                   |
| 6 Acquisition Time       | 4.0894              |
| 7 Acquisition Date       | 2021-10-07T11:38:04 |
| 8 Spectrometer Frequency | 400,13              |
| 9 Spectral Width         | 8012.8              |

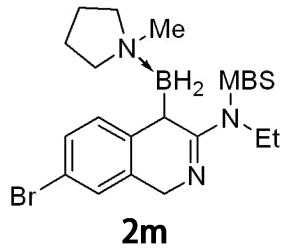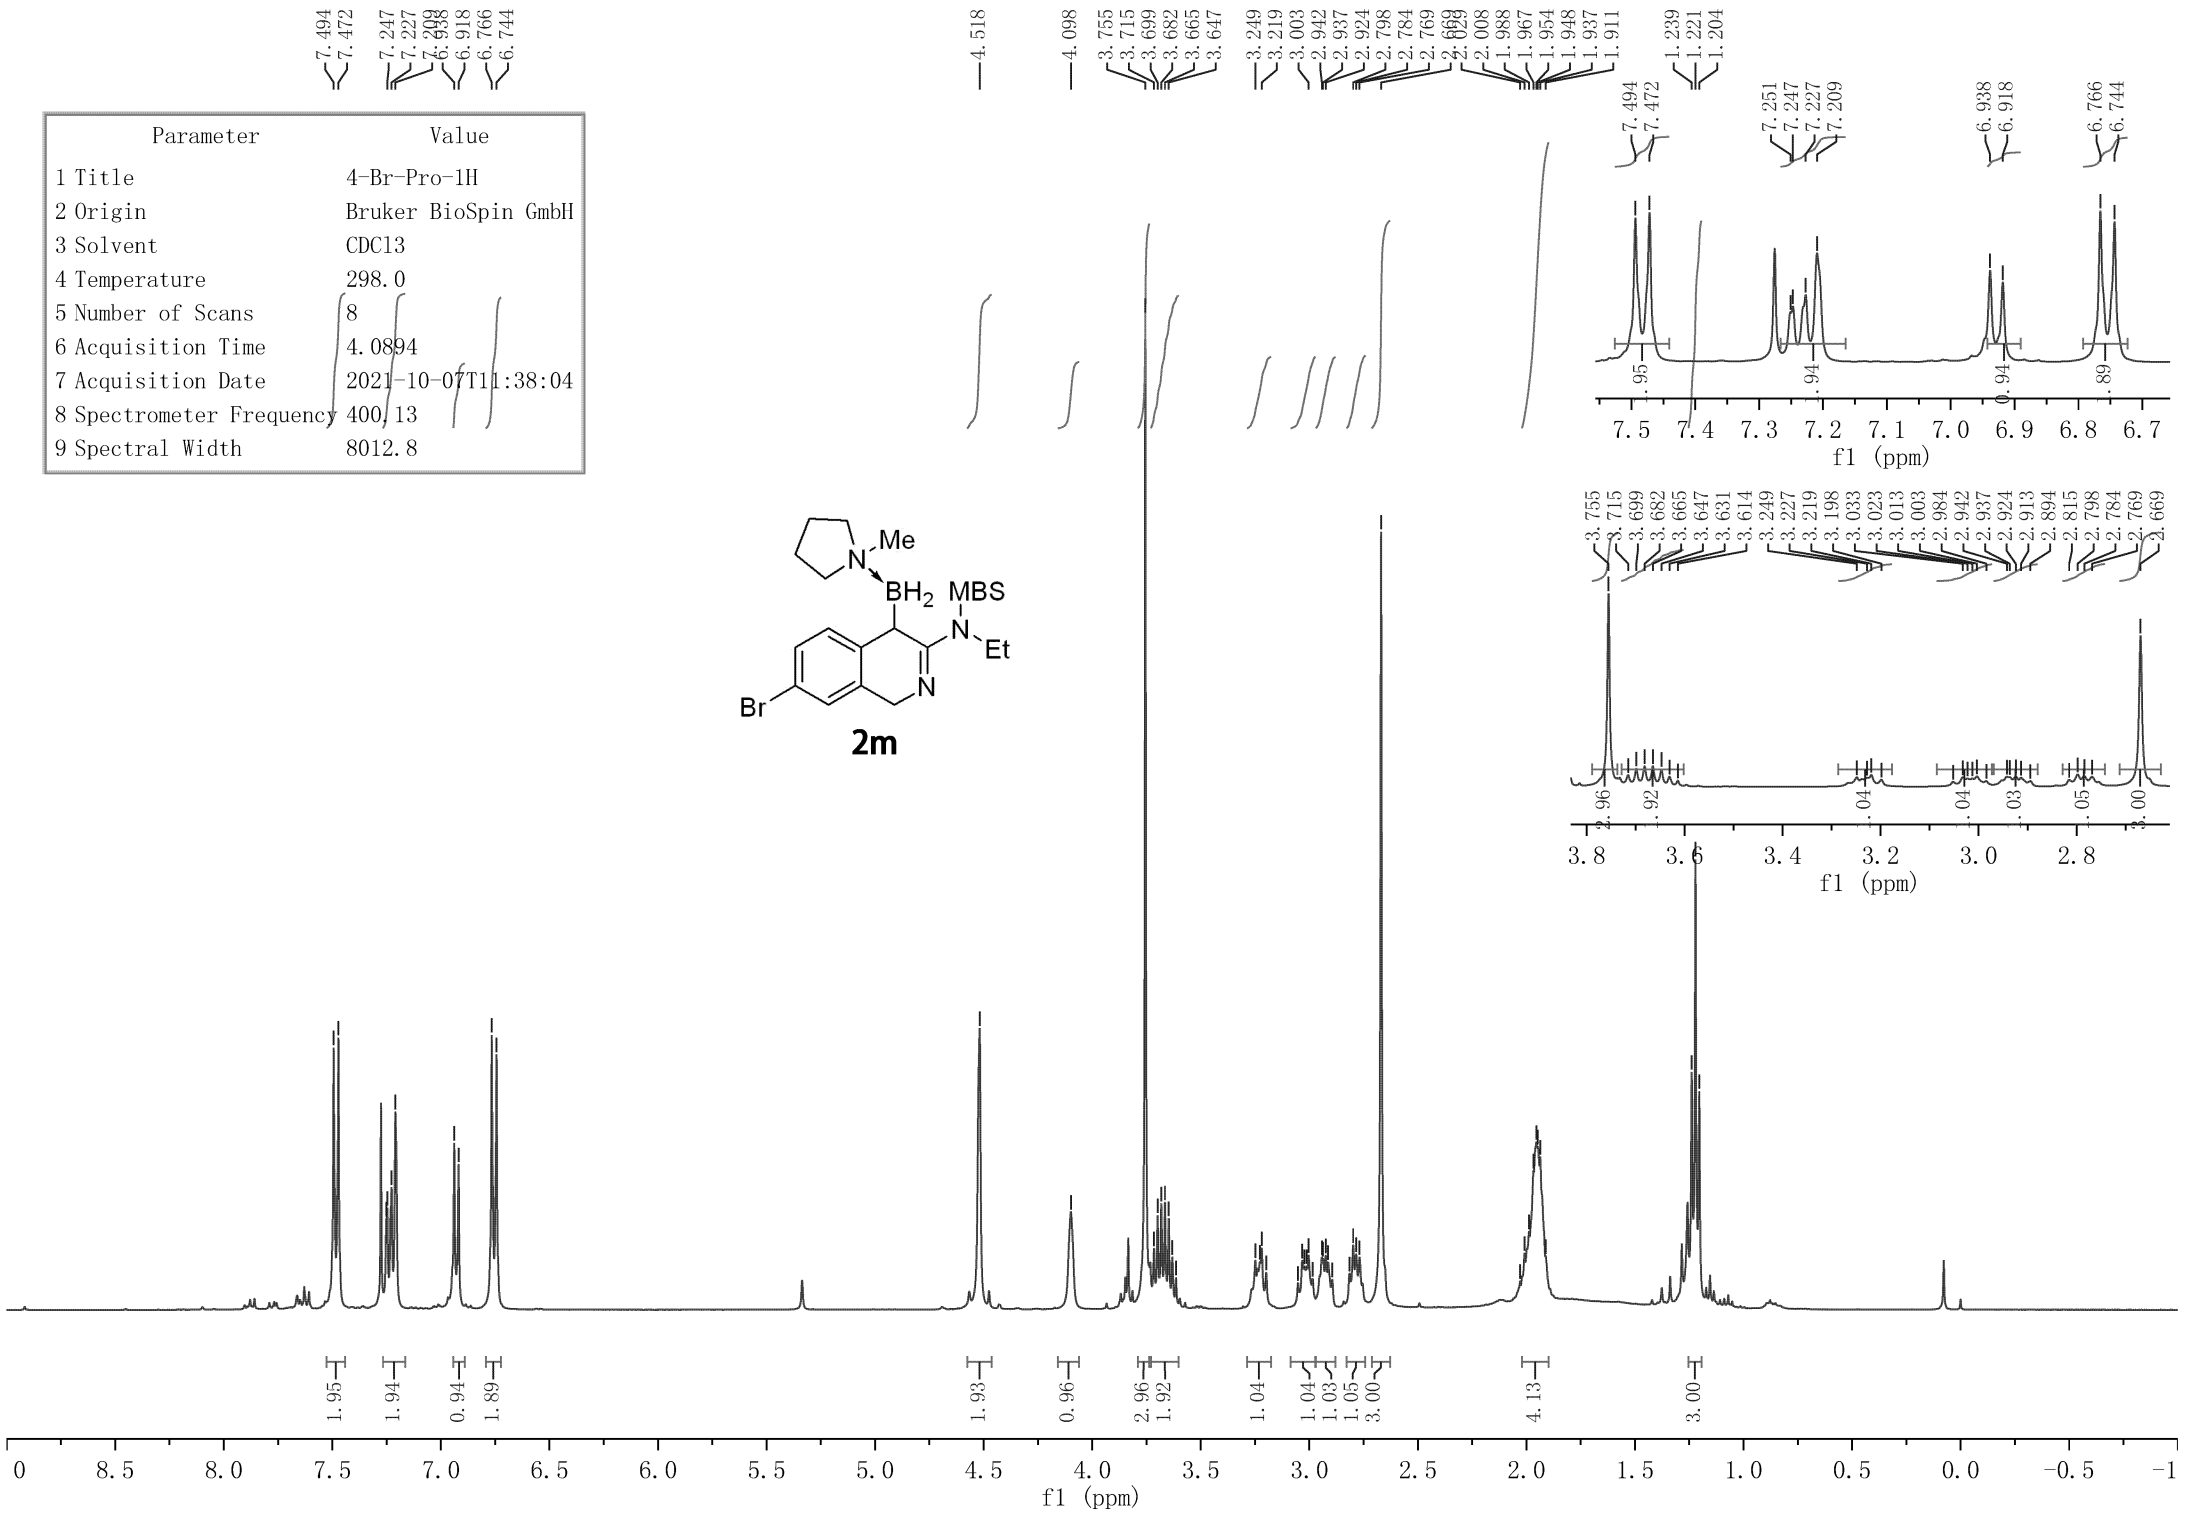

| Parameter                | Value               |
|--------------------------|---------------------|
| 1 Title                  | 4-Br-Pro-C          |
| 2 Origin                 | Bruker BioSpin GmbH |
| 3 Solvent                | CDC13               |
| 4 Temperature            | 300.0               |
| 5 Number of Scans        | 13                  |
| 6 Acquisition Time       | 1.3631              |
| 7 Acquisition Date       | 2021-10-07T14:11:10 |
| 8 Spectrometer Frequency | 100.61              |
| 9 Spectral Width         | 24038.5             |

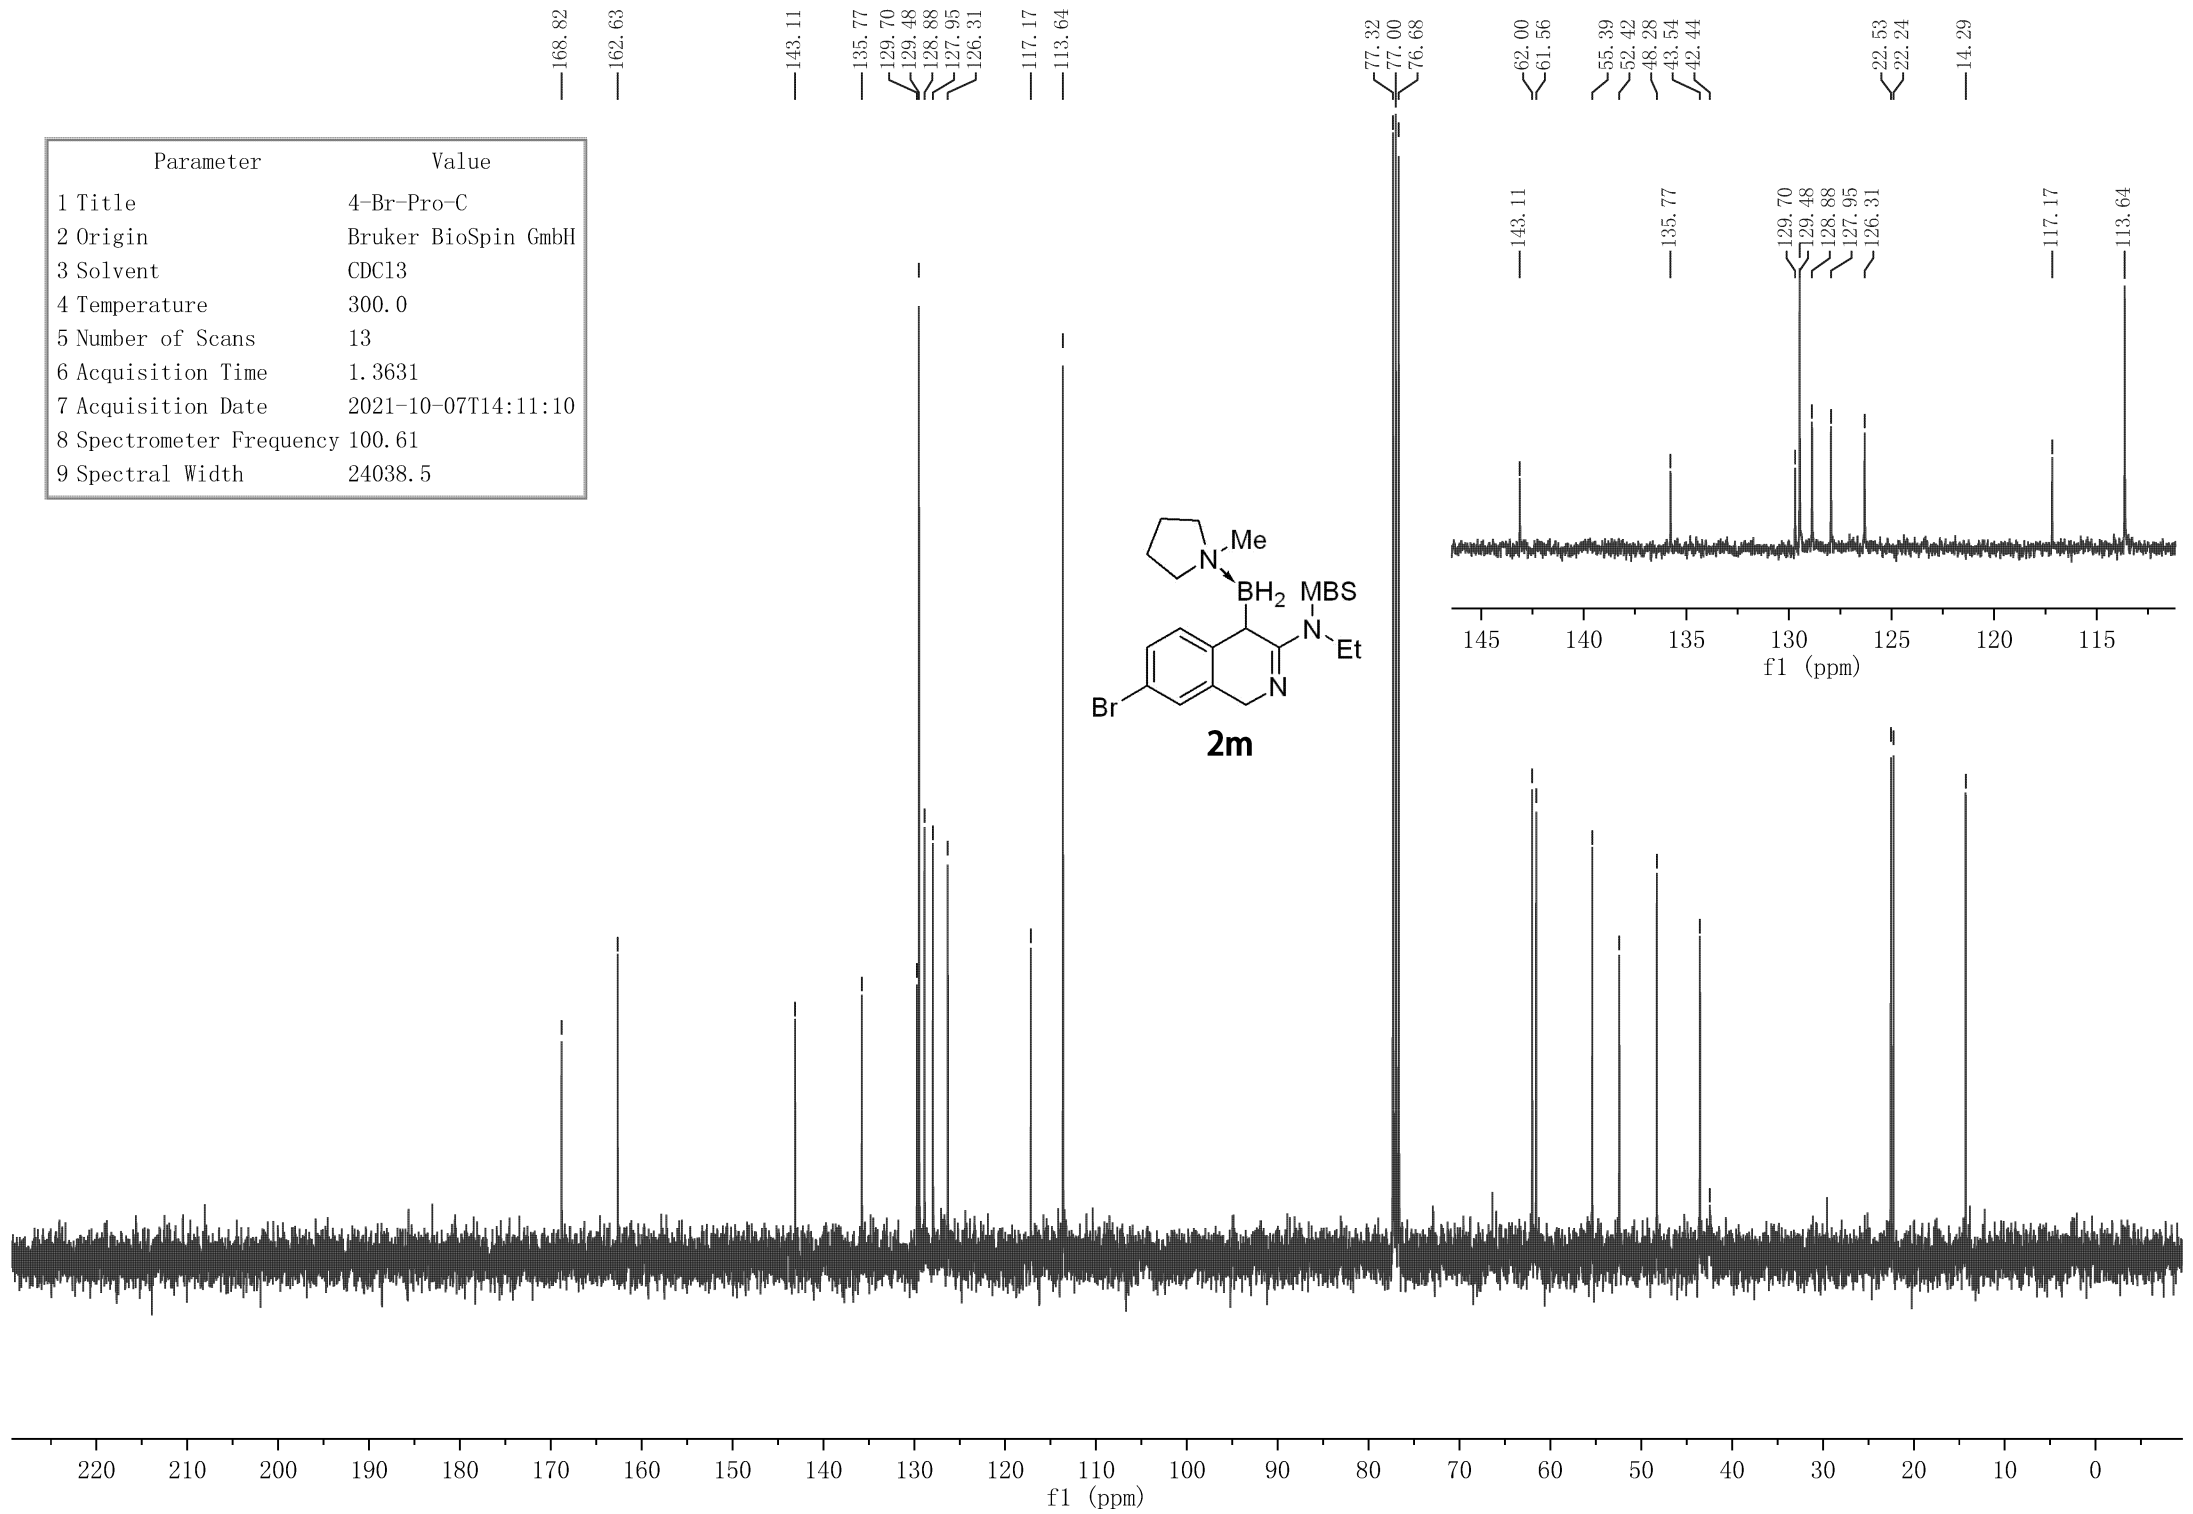

| Parameter                | Value               |
|--------------------------|---------------------|
| 1 Title                  | 4-Me-Prϕ-1H         |
| 2 Origin                 | Bruker BioSpin GmbH |
| 3 Solvent                | CDCl3               |
| 4 Temperature            | 298.0               |
| 5 Number of Scans        | 6                   |
| 6 Acquisition Time       | 4.0894              |
| 7 Acquisition Date       | 2021-10-23T09:39:49 |
| 8 Spectrometer Frequency | 400.13              |
| 9 Spectral Width         | 8012.8              |

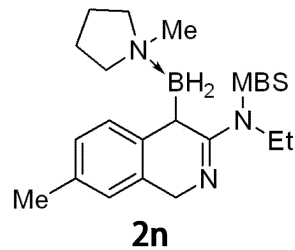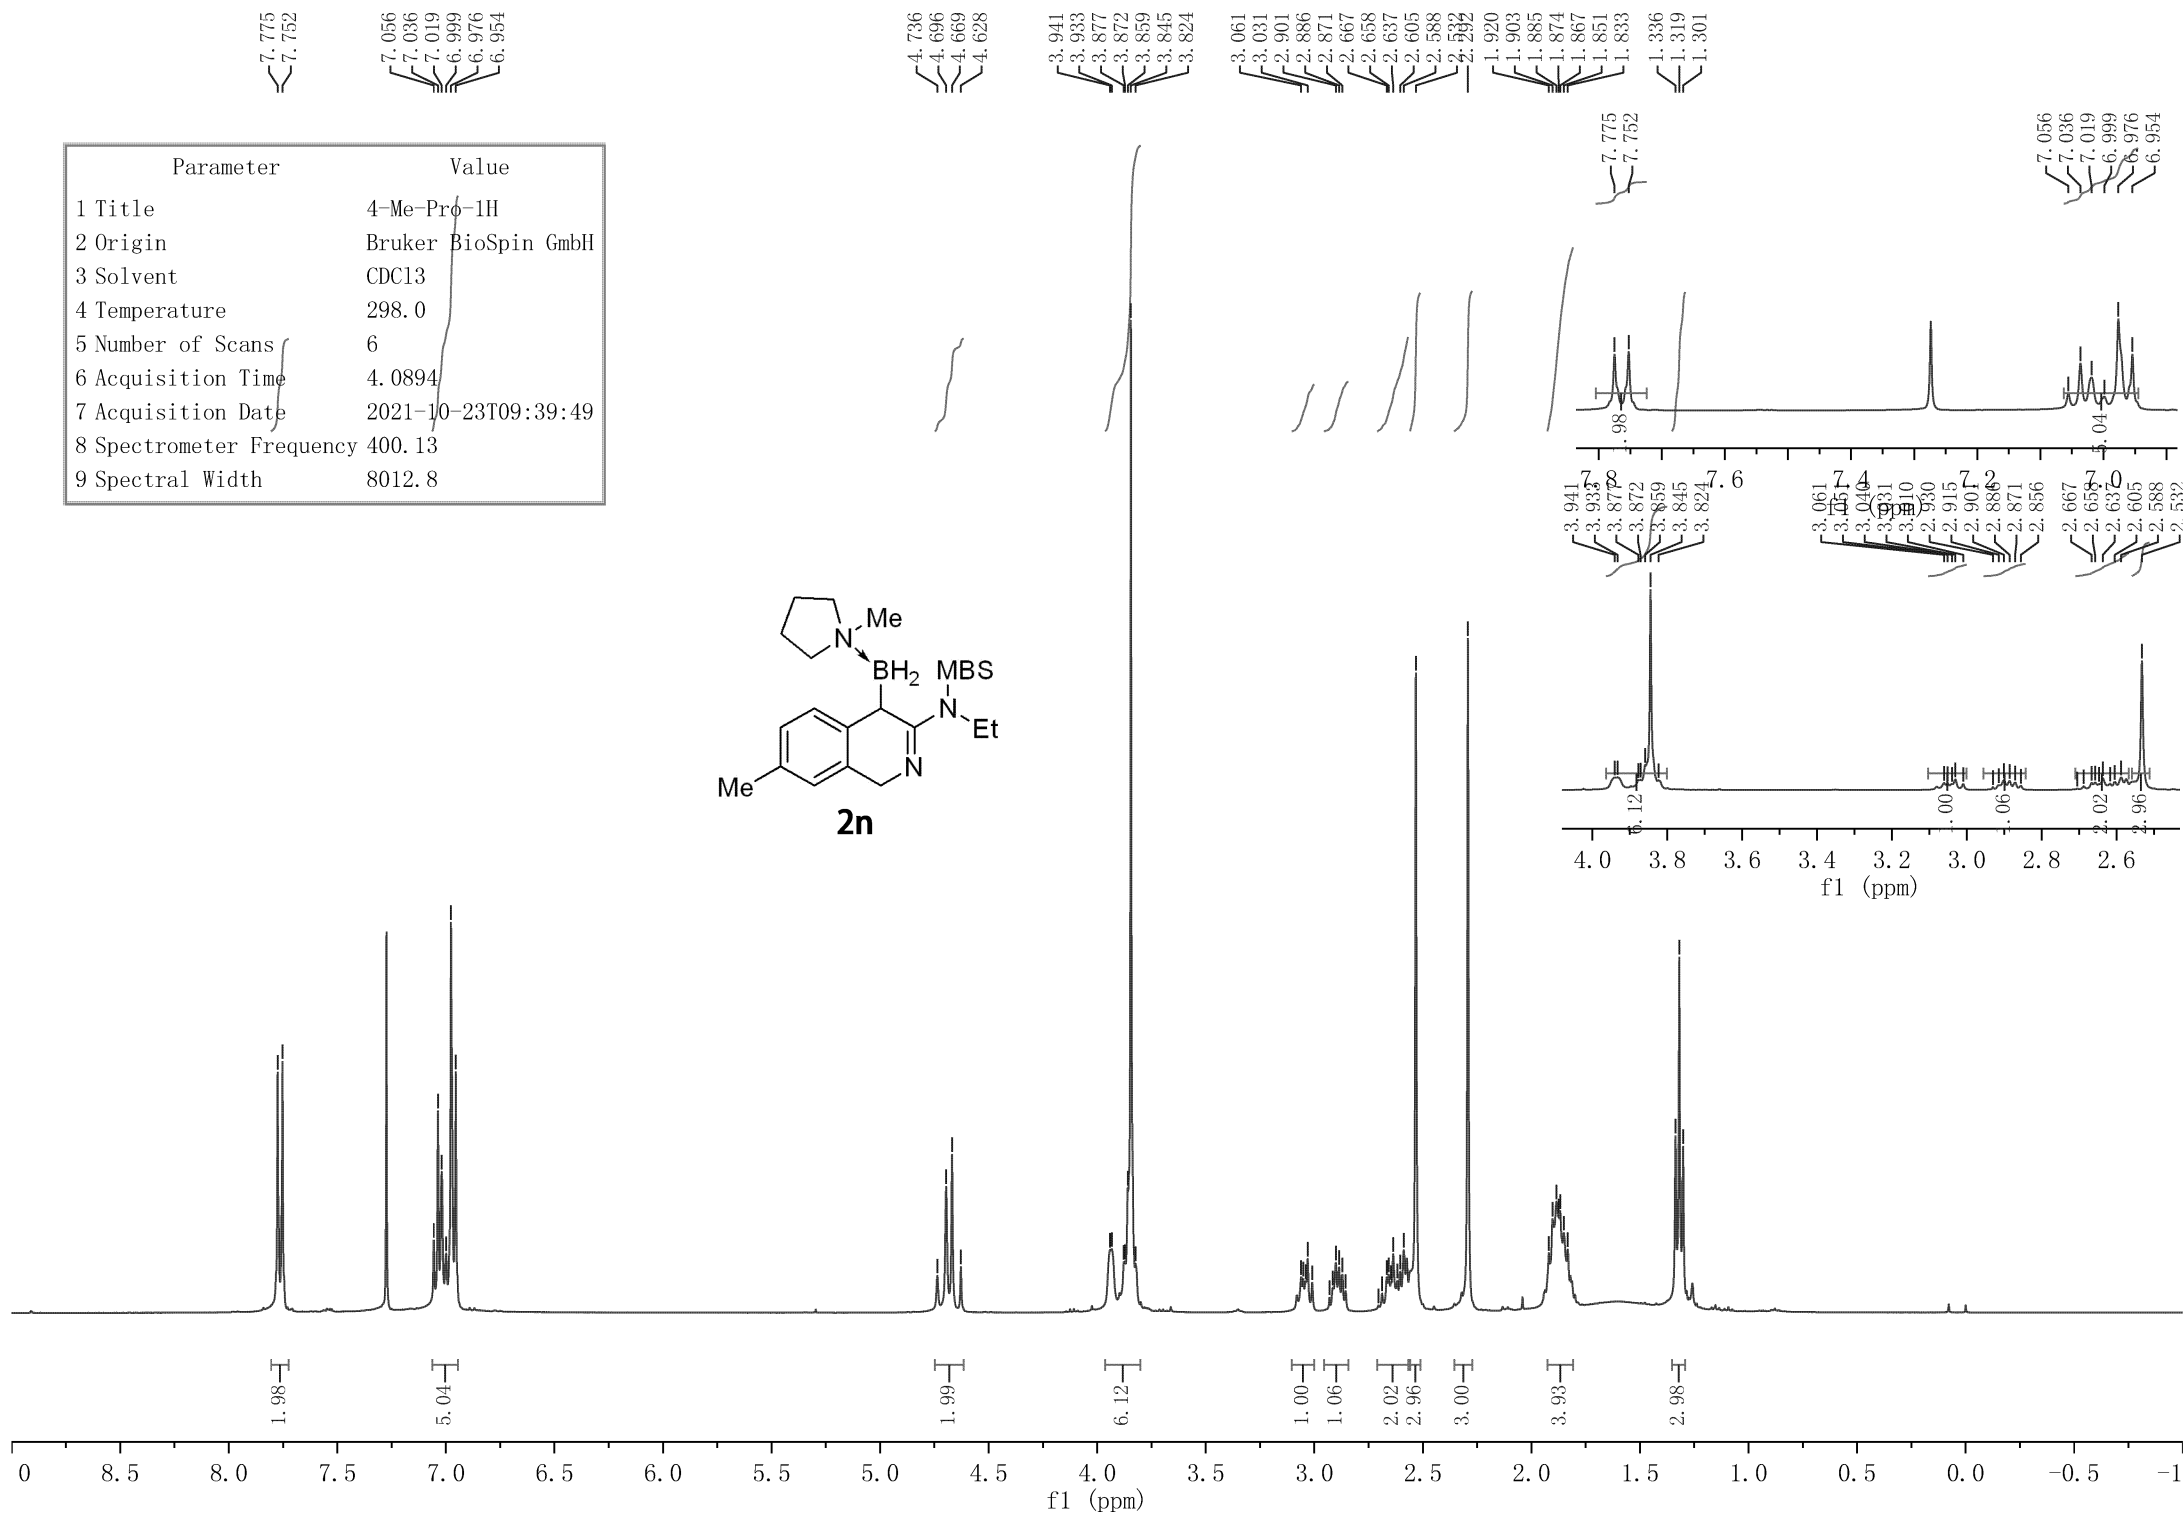

| Parameter                | Value               |
|--------------------------|---------------------|
| 1 Title                  | 4-Me-Pro-C          |
| 2 Origin                 | Bruker BioSpin GmbH |
| 3 Solvent                | CDC13               |
| 4 Temperature            | 300.0               |
| 5 Number of Scans        | 277                 |
| 6 Acquisition Time       | 1.3631              |
| 7 Acquisition Date       | 2021-11-18T13:18:48 |
| 8 Spectrometer Frequency | 100.61              |
| 9 Spectral Width         | 24038.5             |

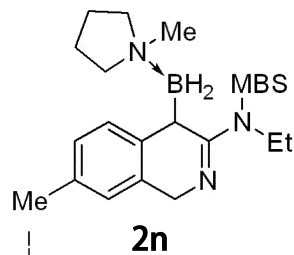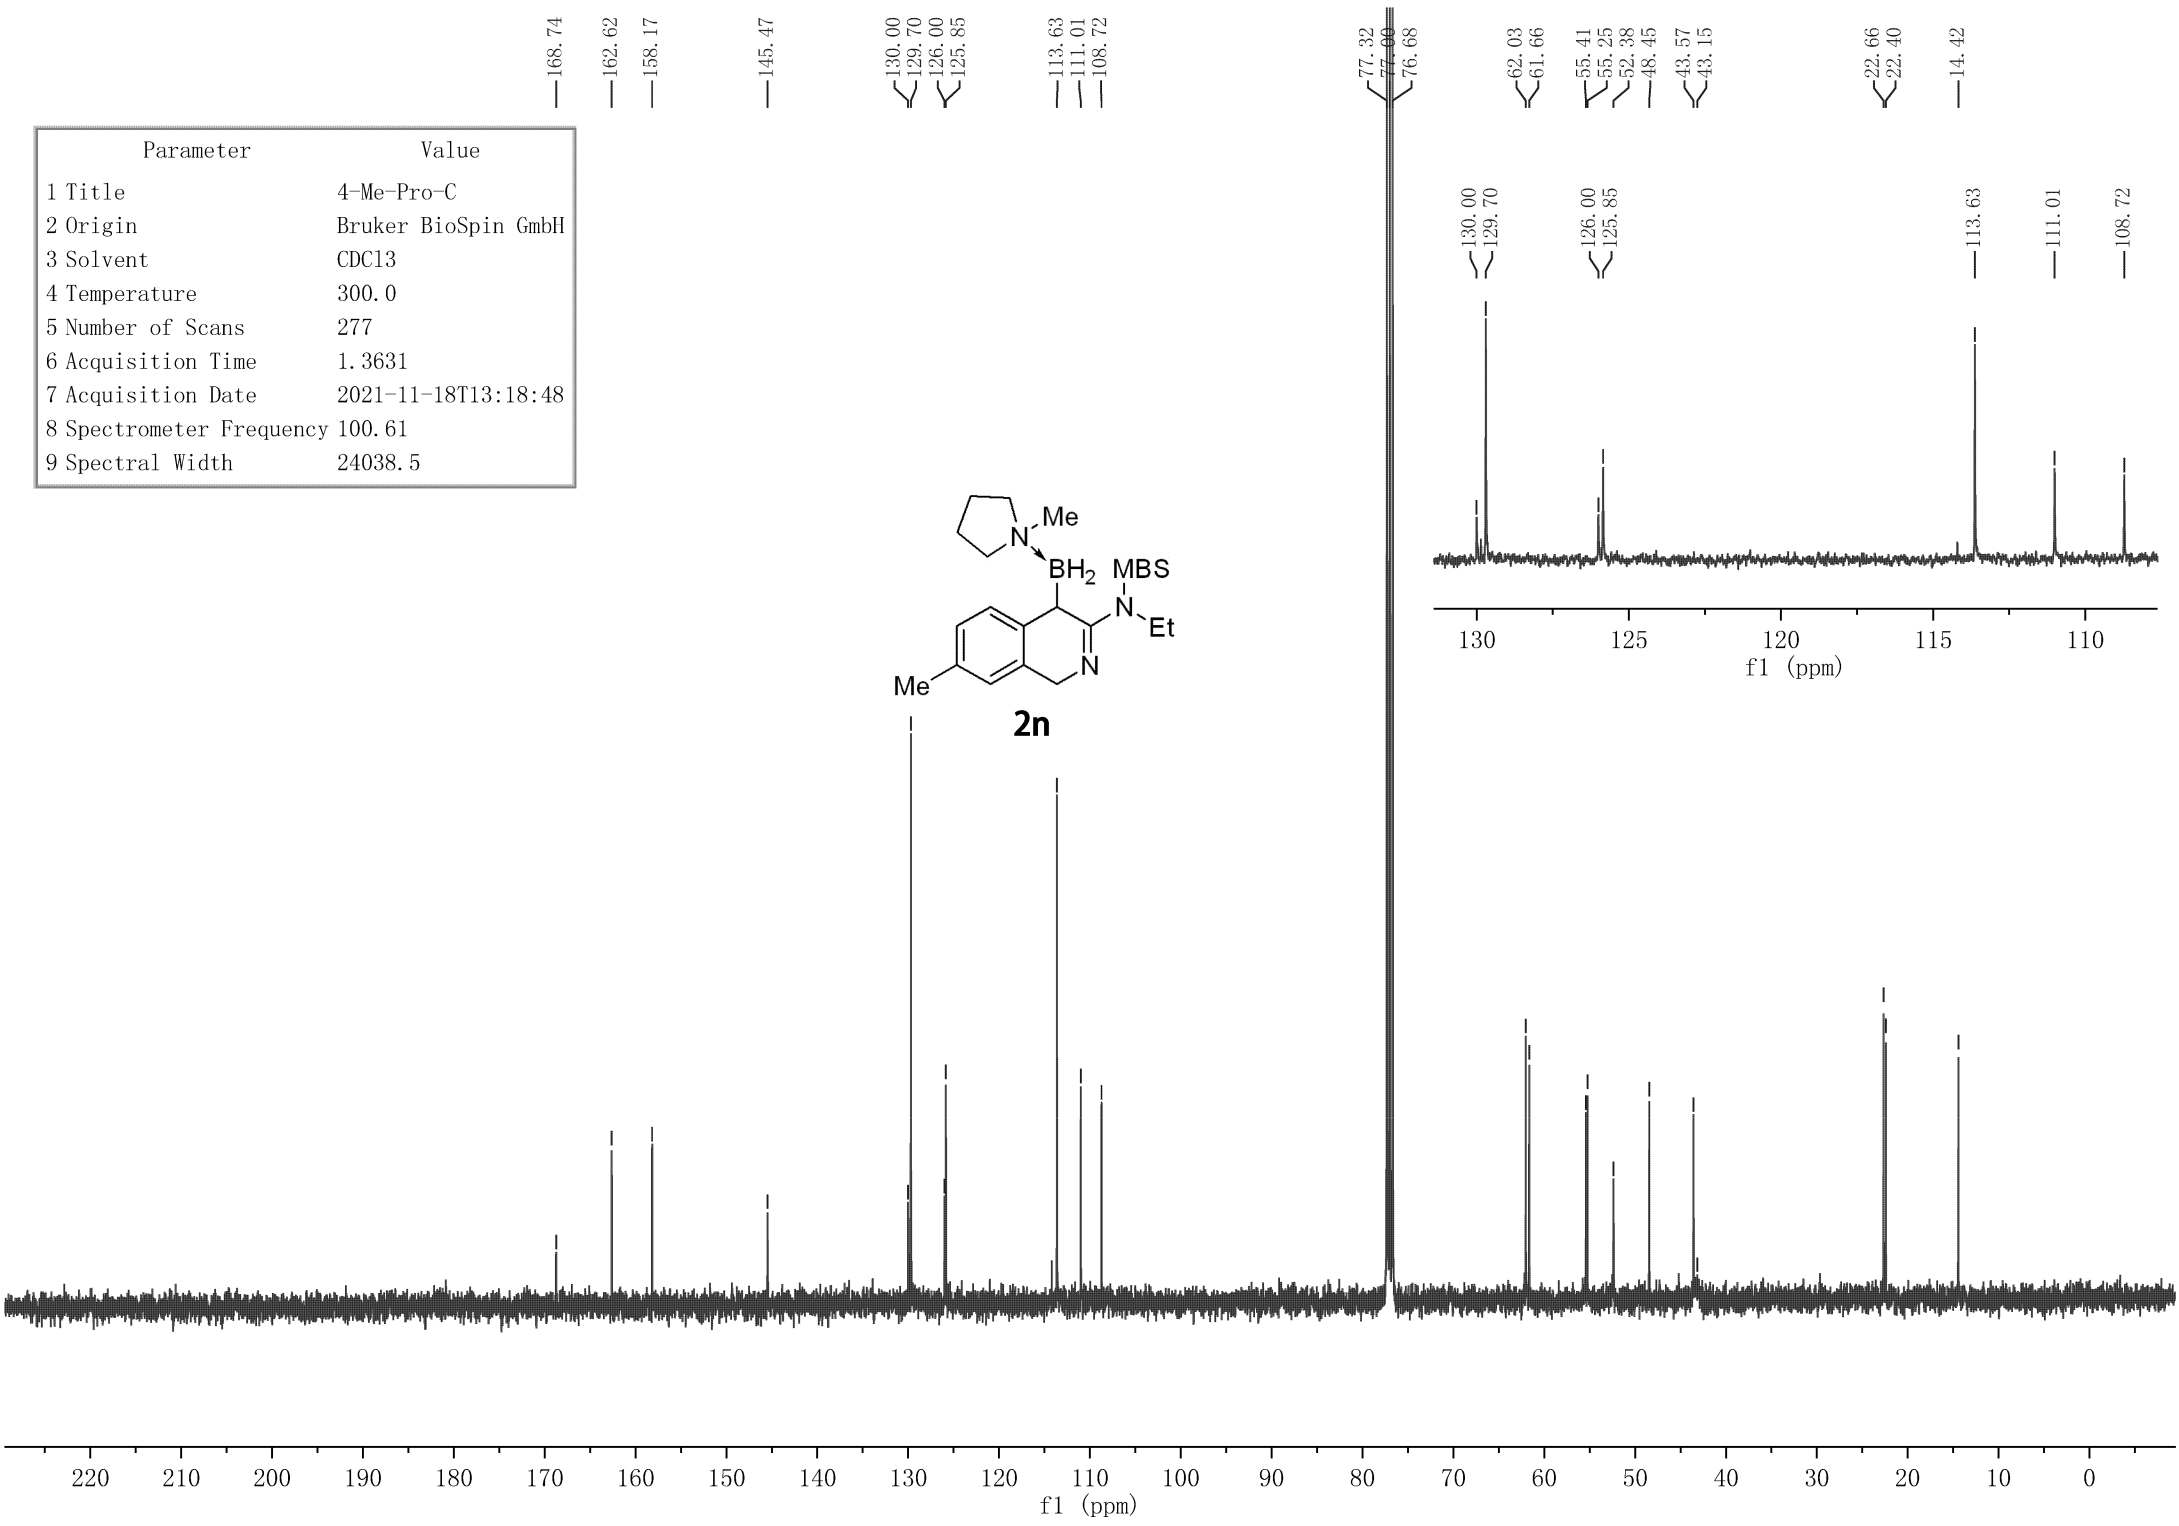



| Parameter                | Value               |
|--------------------------|---------------------|
| 1 Title                  | 5-Me-Pro-1H         |
| 2 Origin                 | Bruker BioSpin GmbH |
| 3 Solvent                | CDCl3               |
| 4 Temperature            | 298.0               |
| 5 Number of Scans        | 8                   |
| 6 Acquisition Time       | 4.0894              |
| 7 Acquisition Date       | 2021-09-20T14:46:16 |
| 8 Spectrometer Frequency | 400.13              |
| 9 Spectral Width         | 8012.8              |

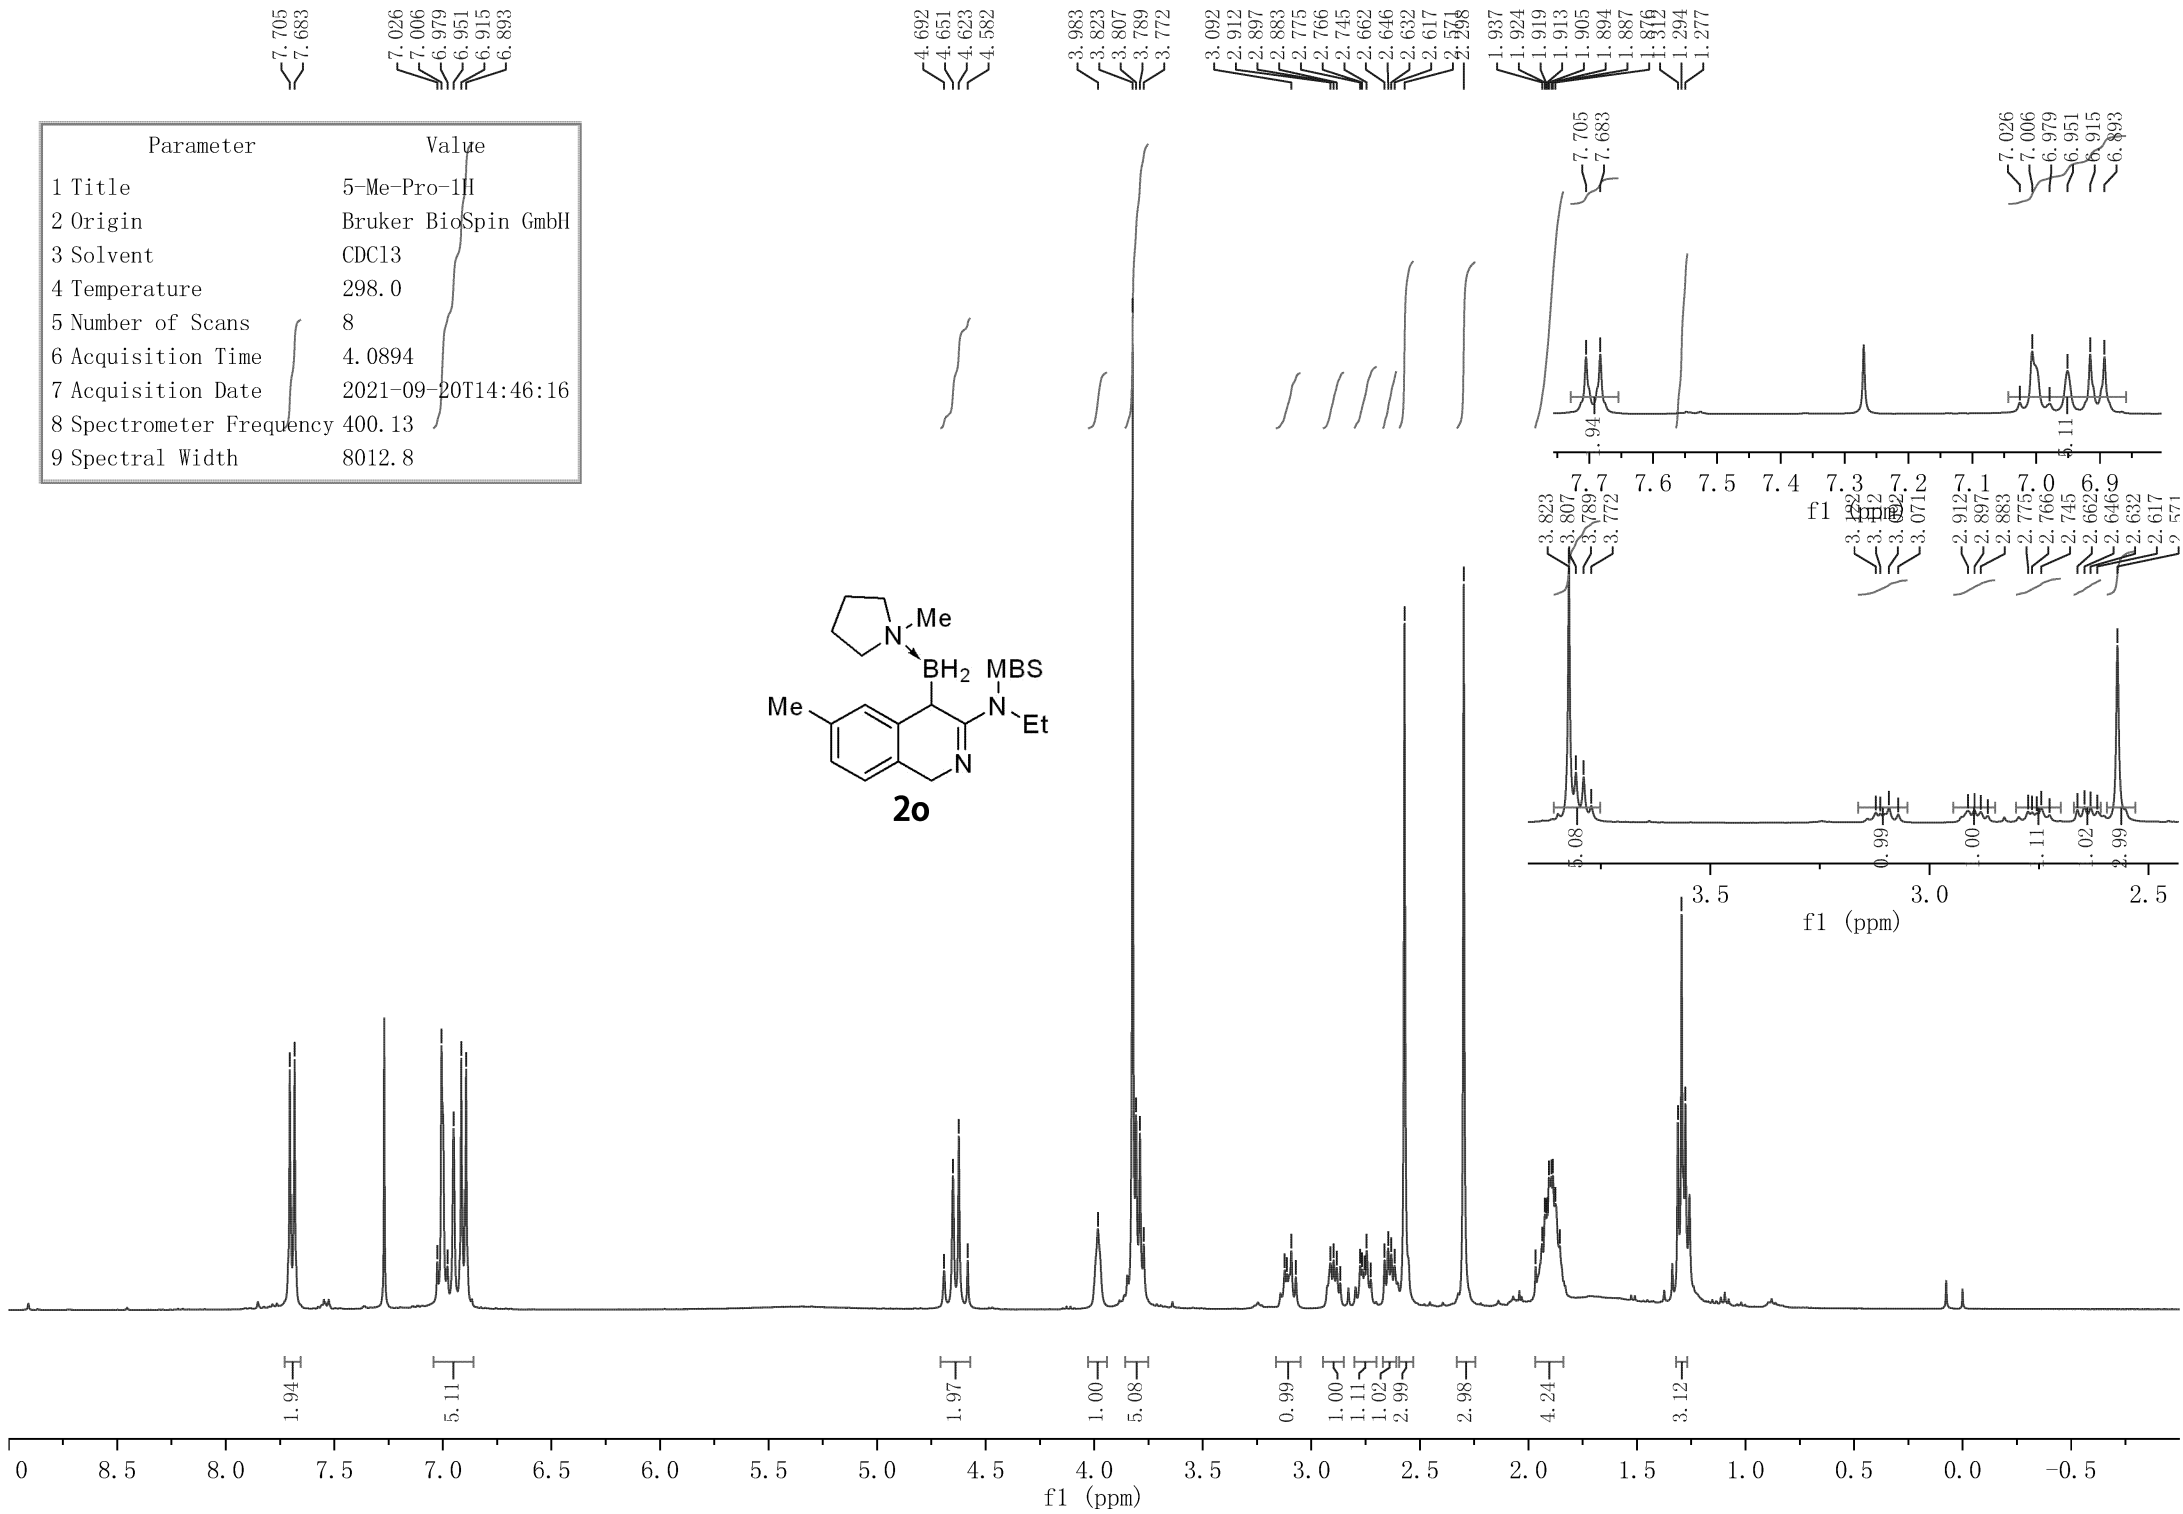

| Parameter                | Value               |
|--------------------------|---------------------|
| 1 Title                  | 5-Me-Pro-C          |
| 2 Origin                 | Bruker BioSpin GmbH |
| 3 Solvent                | CDC13               |
| 4 Temperature            | 300.0               |
| 5 Number of Scans        | 40                  |
| 6 Acquisition Time       | 1.3631              |
| 7 Acquisition Date       | 2021-09-20T14:47:43 |
| 8 Spectrometer Frequency | 100.61              |
| 9 Spectral Width         | 24038.5             |

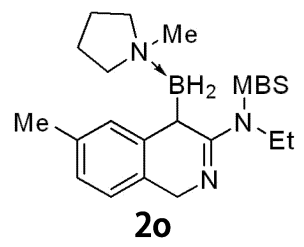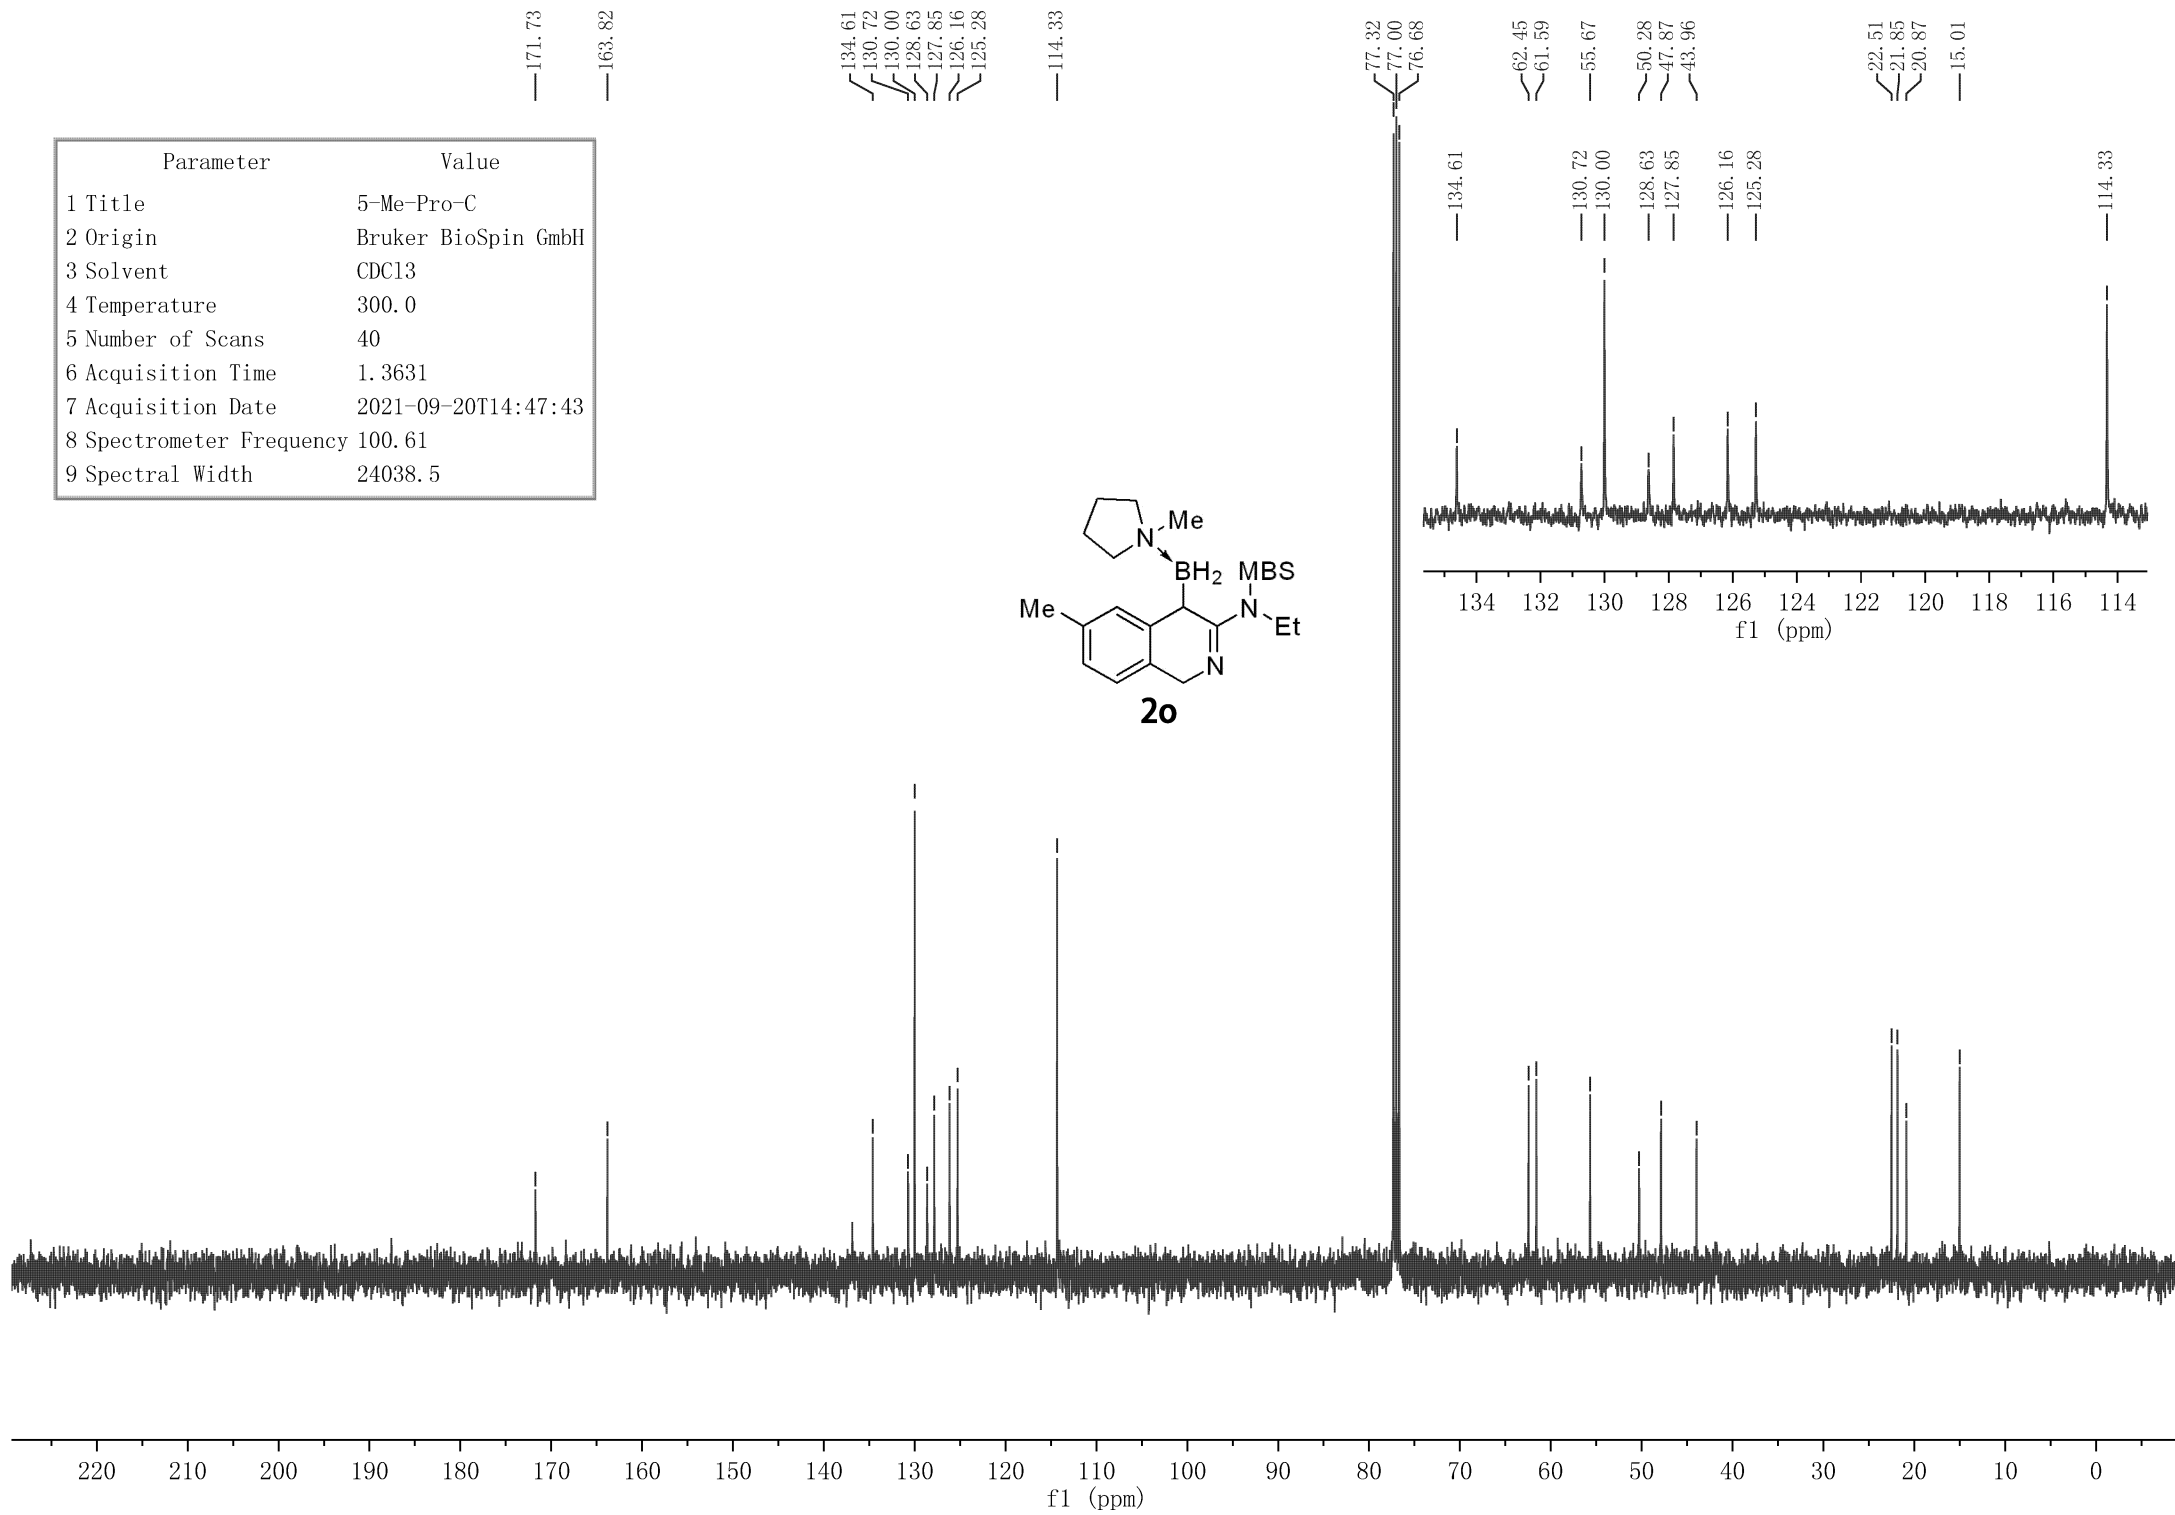

| Parameter                | Value               |
|--------------------------|---------------------|
| 1 Title                  | 5-MeO-P             |
| 2 Origin                 | Bruker BioSpin GmbH |
| 3 Solvent                | MeOD                |
| 4 Temperature            | 298.0               |
| 5 Number of Scans        | 8                   |
| 6 Acquisition Time       | 4.0894              |
| 7 Acquisition Date       | 2021-11-19T00:01:29 |
| 8 Spectrometer Frequency | 400.13              |
| 9 Spectral Width         | 8012.8              |

7.536  
7.513

6.908  
6.888  
6.834  
6.812  
6.573  
6.568  
6.562  
6.555  
6.541  
6.535

4.422  
4.382  
4.351  
4.311  
3.892  
3.734  
3.716  
3.693  
3.660  
3.630  
3.613  
3.022  
3.001  
2.972  
2.953  
2.820  
2.771  
2.716  
2.686  
2.630  
2.612  
2.582  
2.457

1.167  
1.149  
1.131

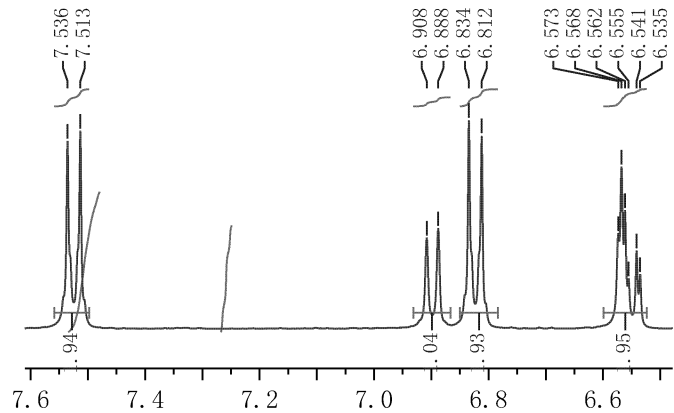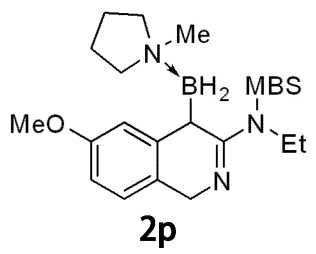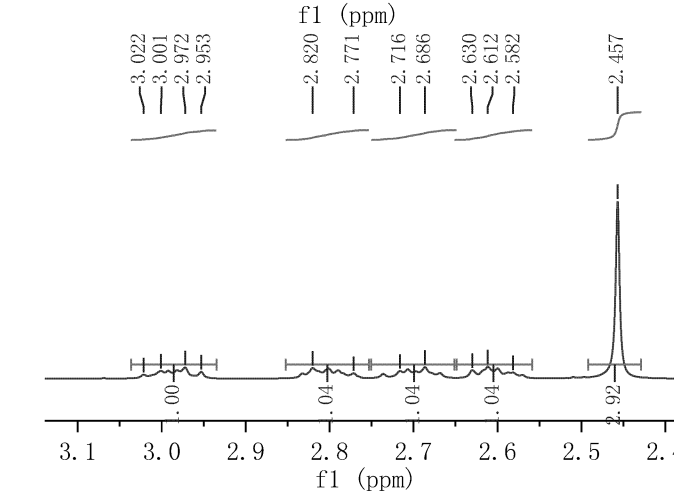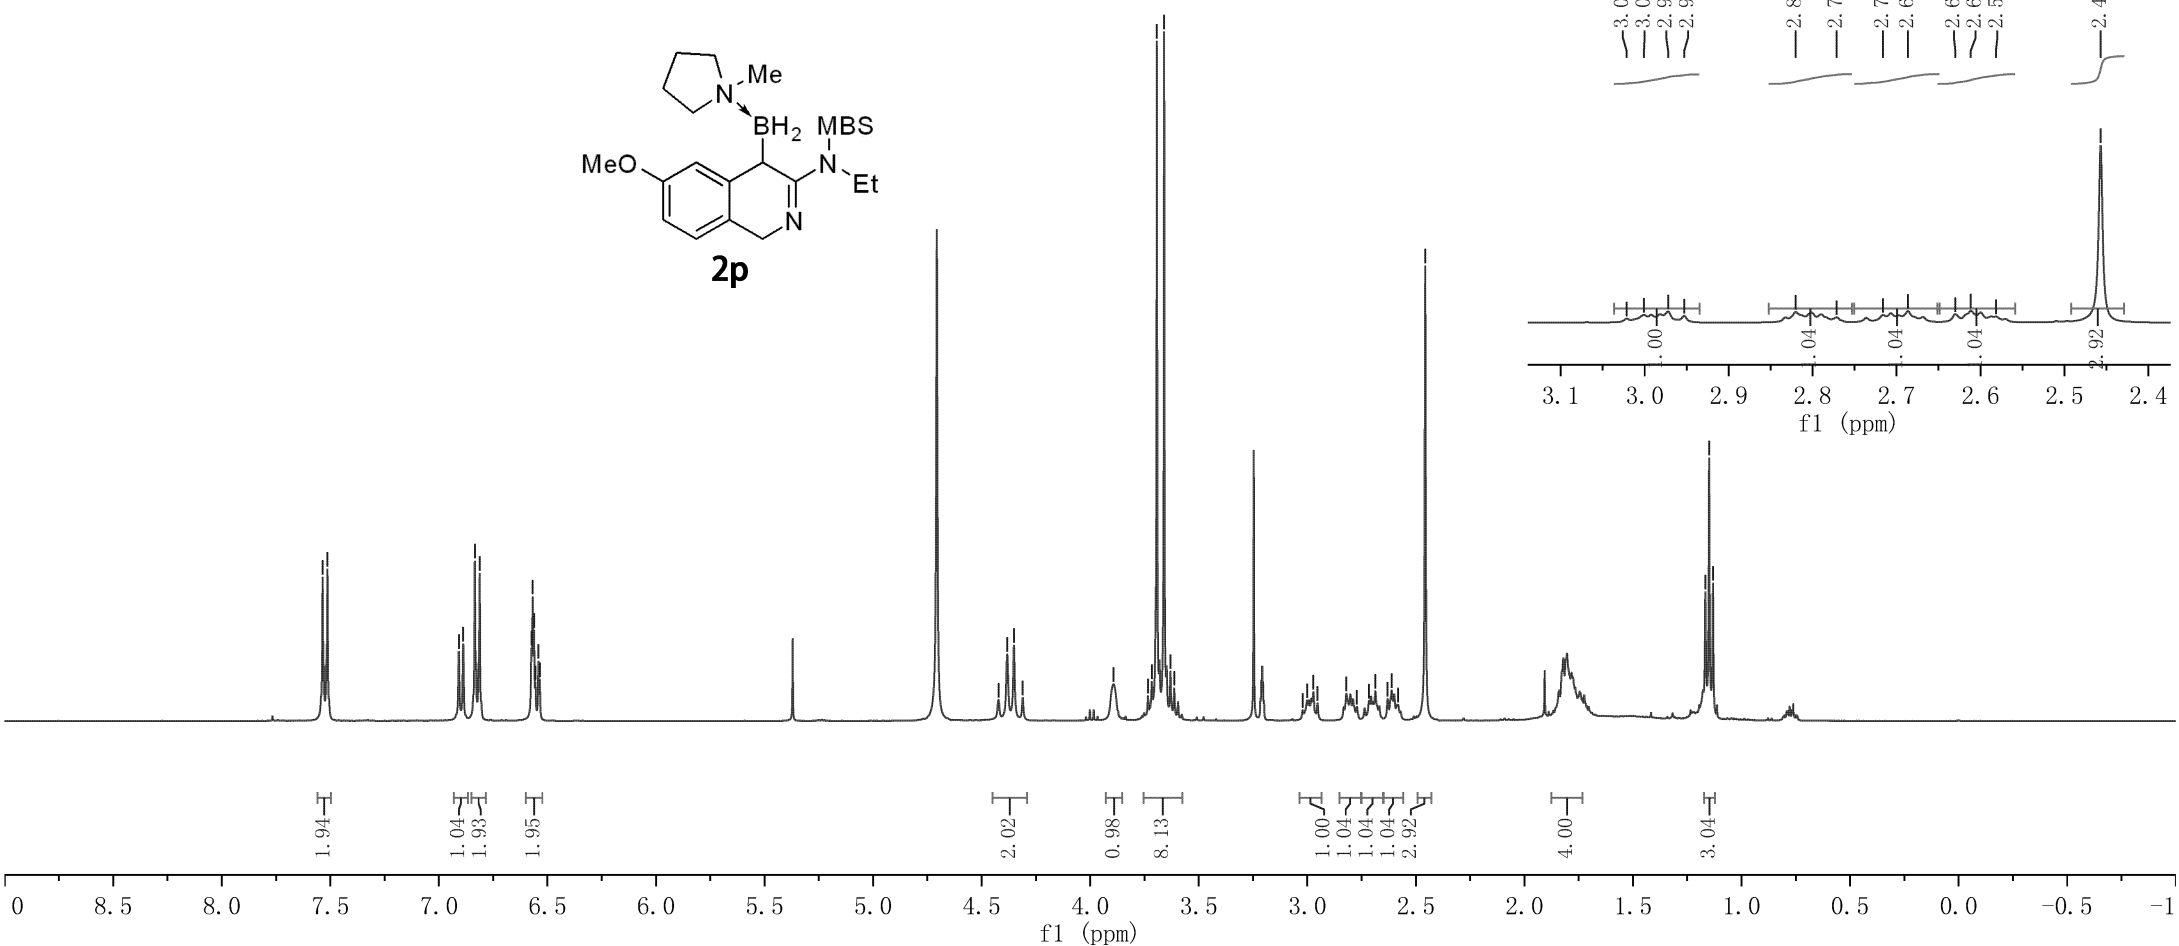

| Parameter                | Value               |
|--------------------------|---------------------|
| 1 Title                  | 5-MeO-product       |
| 2 Origin                 | Bruker BioSpin GmbH |
| 3 Solvent                | MeOD                |
| 4 Temperature            | 300.0               |
| 5 Number of Scans        | 43                  |
| 6 Acquisition Time       | 1.3631              |
| 7 Acquisition Date       | 2021-11-19T00:02:38 |
| 8 Spectrometer Frequency | 100.61              |
| 9 Spectral Width         | 24038.5             |

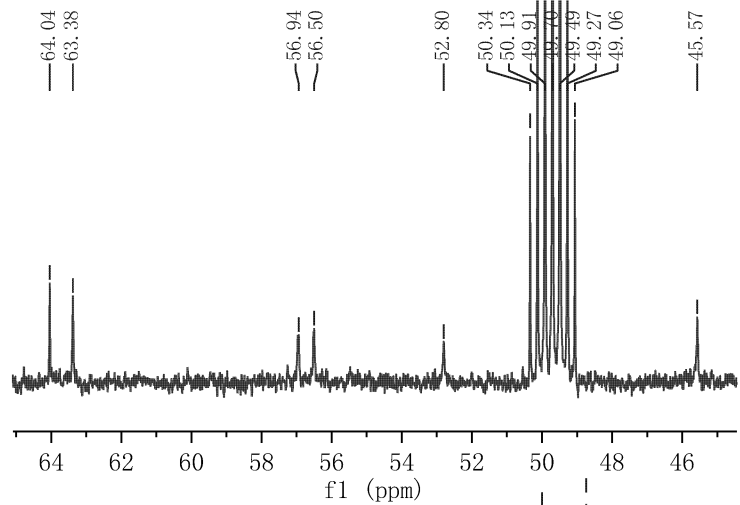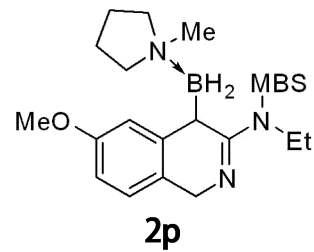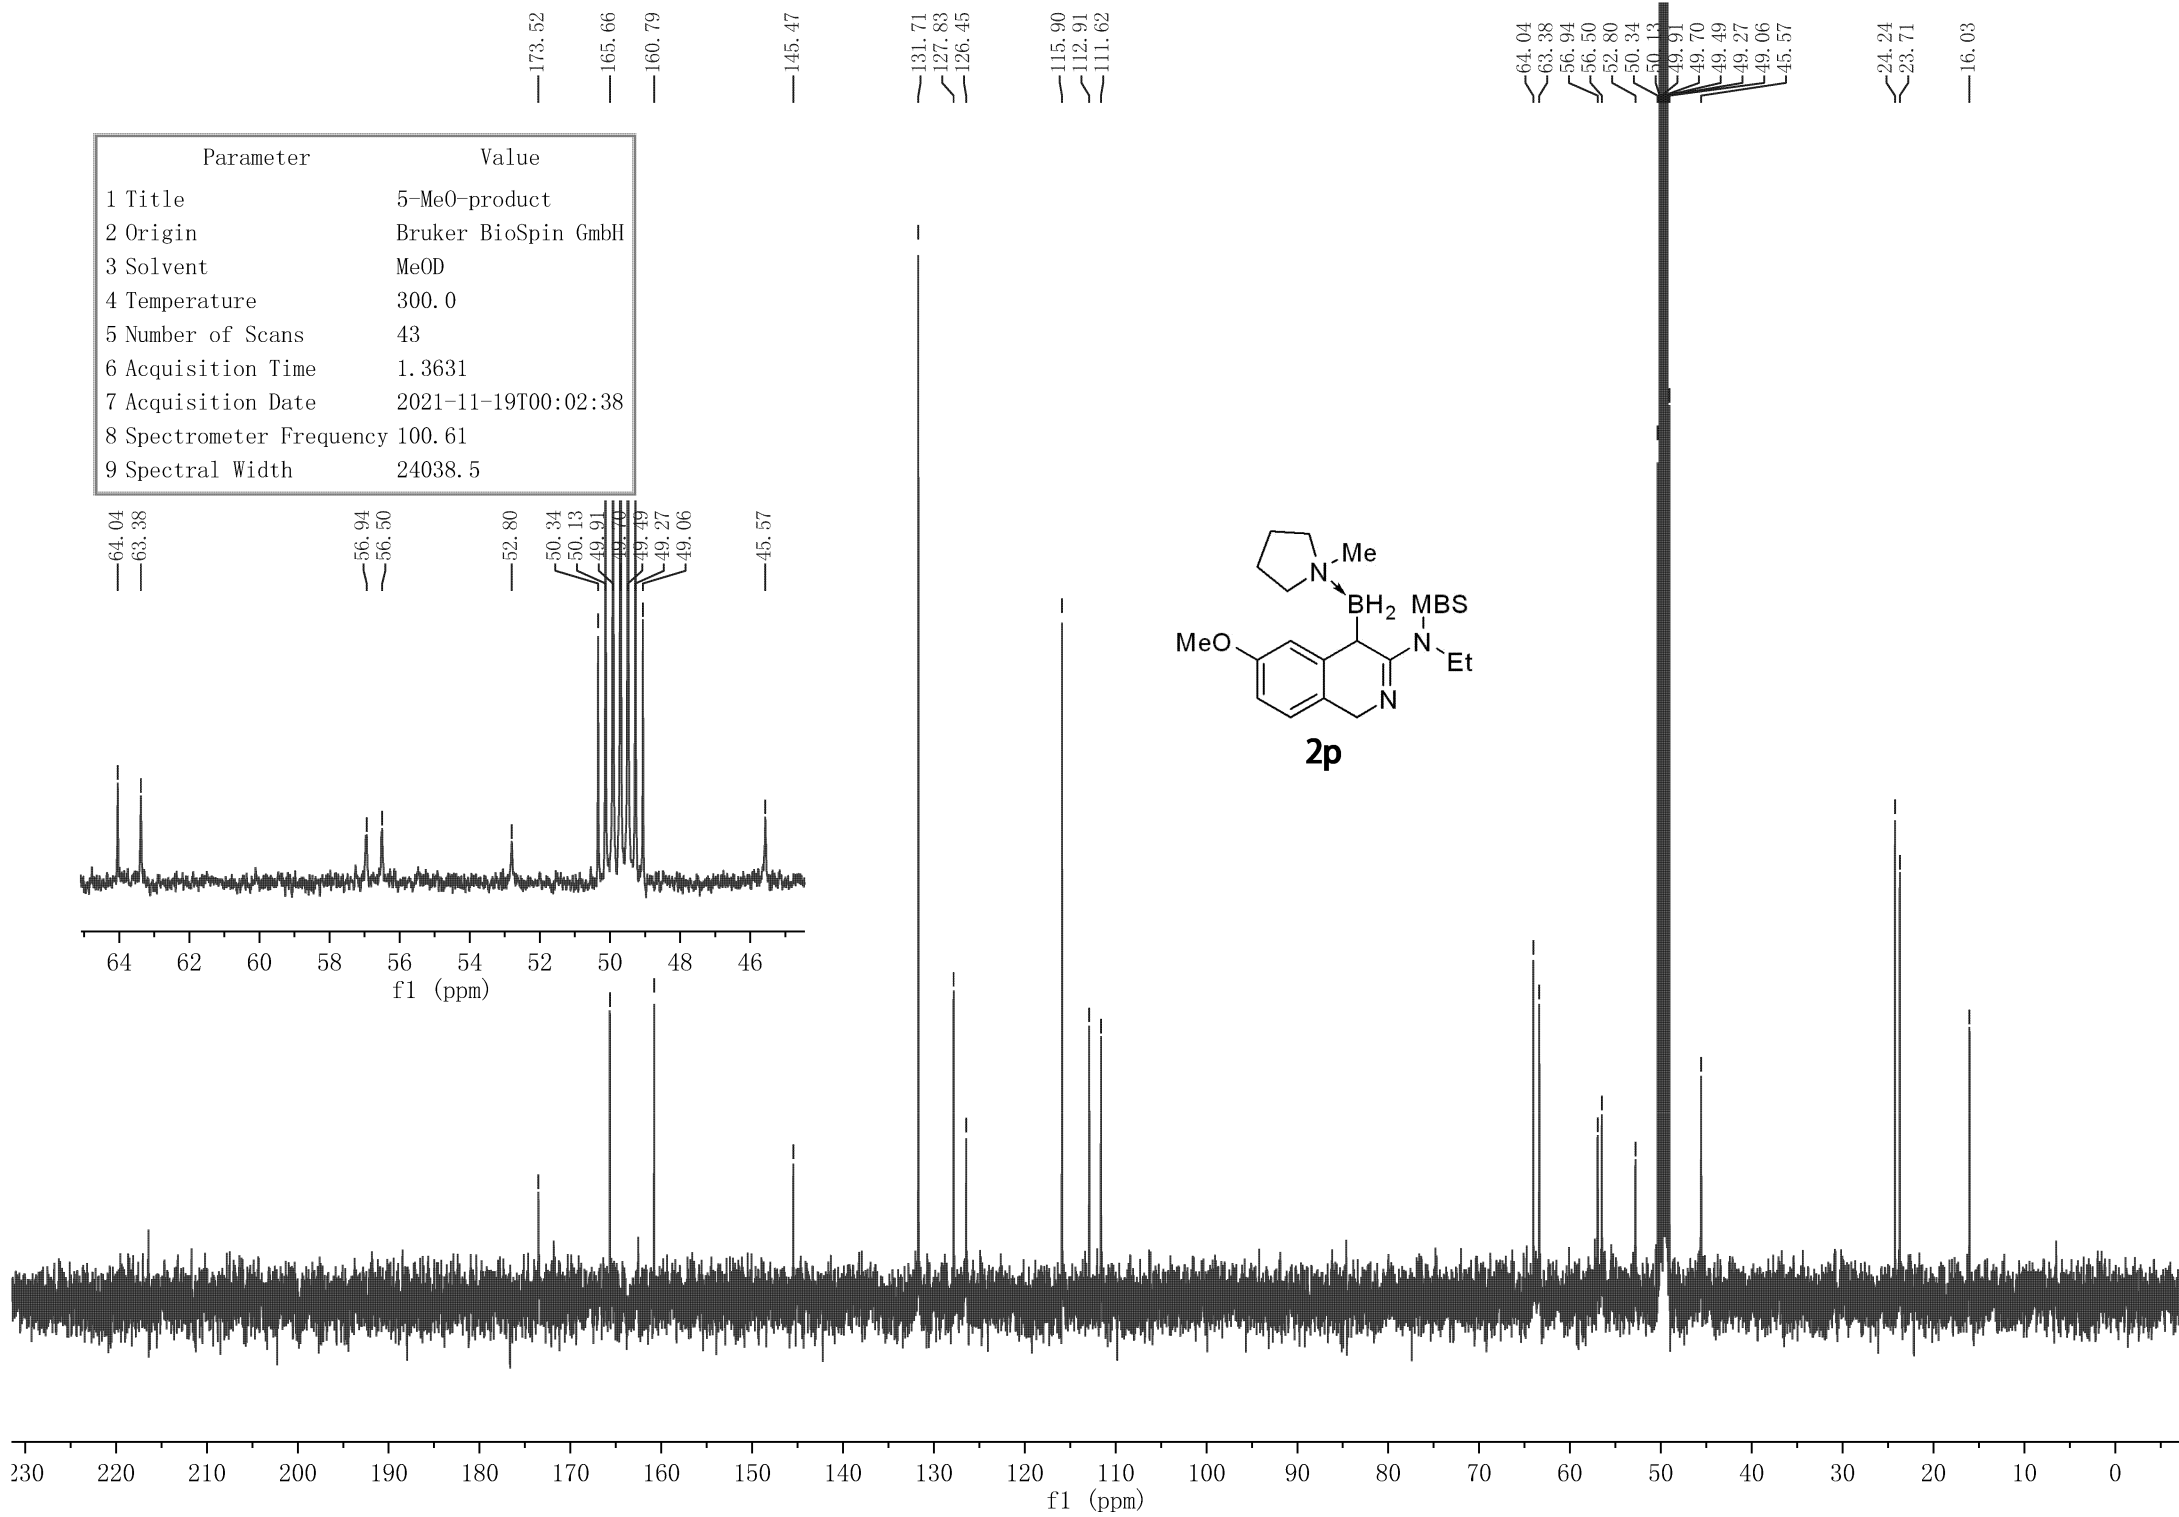

7.465  
7.443  
7.123  
7.115  
7.107  
7.064  
7.047  
6.974  
6.692

| Parameter                | Value               |
|--------------------------|---------------------|
| 1 Title                  | zgy-9-2q-H          |
| 2 Origin                 | Bruker BioSpin GmbH |
| 3 Solvent                | CDC13               |
| 4 Temperature            | 298.0               |
| 5 Number of Scans        | 9                   |
| 6 Acquisition Time       | 4.0894              |
| 7 Acquisition Date       | 2022-01-21T16:40:17 |
| 8 Spectrometer Frequency | 400.13              |
| 9 Spectral Width         | 8012.8              |

4.545  
4.123  
3.735  
3.705  
3.688  
3.671  
3.648  
3.631  
3.614  
3.601  
3.035  
2.975  
2.966  
2.886  
2.852  
2.808  
2.775  
2.646  
1.804  
1.792  
1.779  
1.769  
1.706  
1.681  
1.656  
1.638  
1.628  
1.478  
1.466  
1.453  
1.441  
1.257  
1.239  
1.222

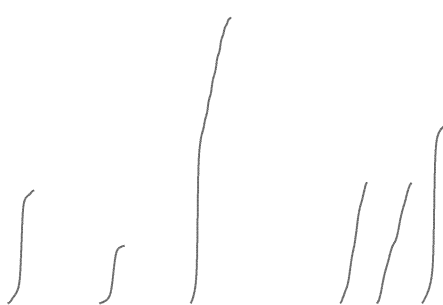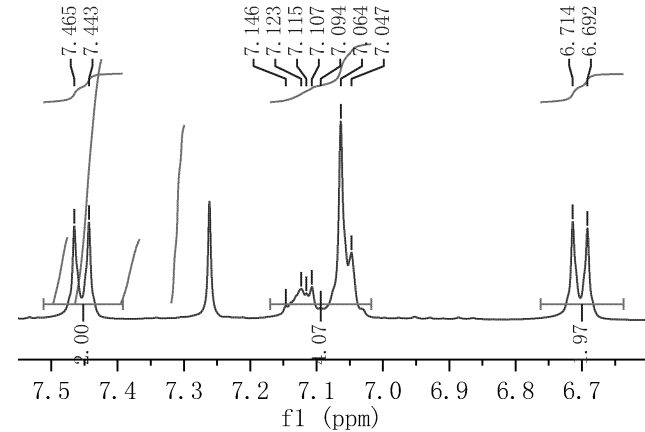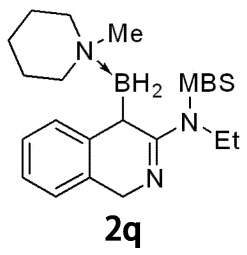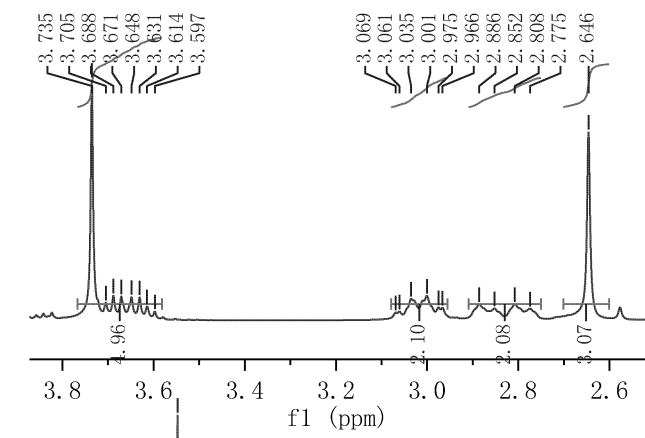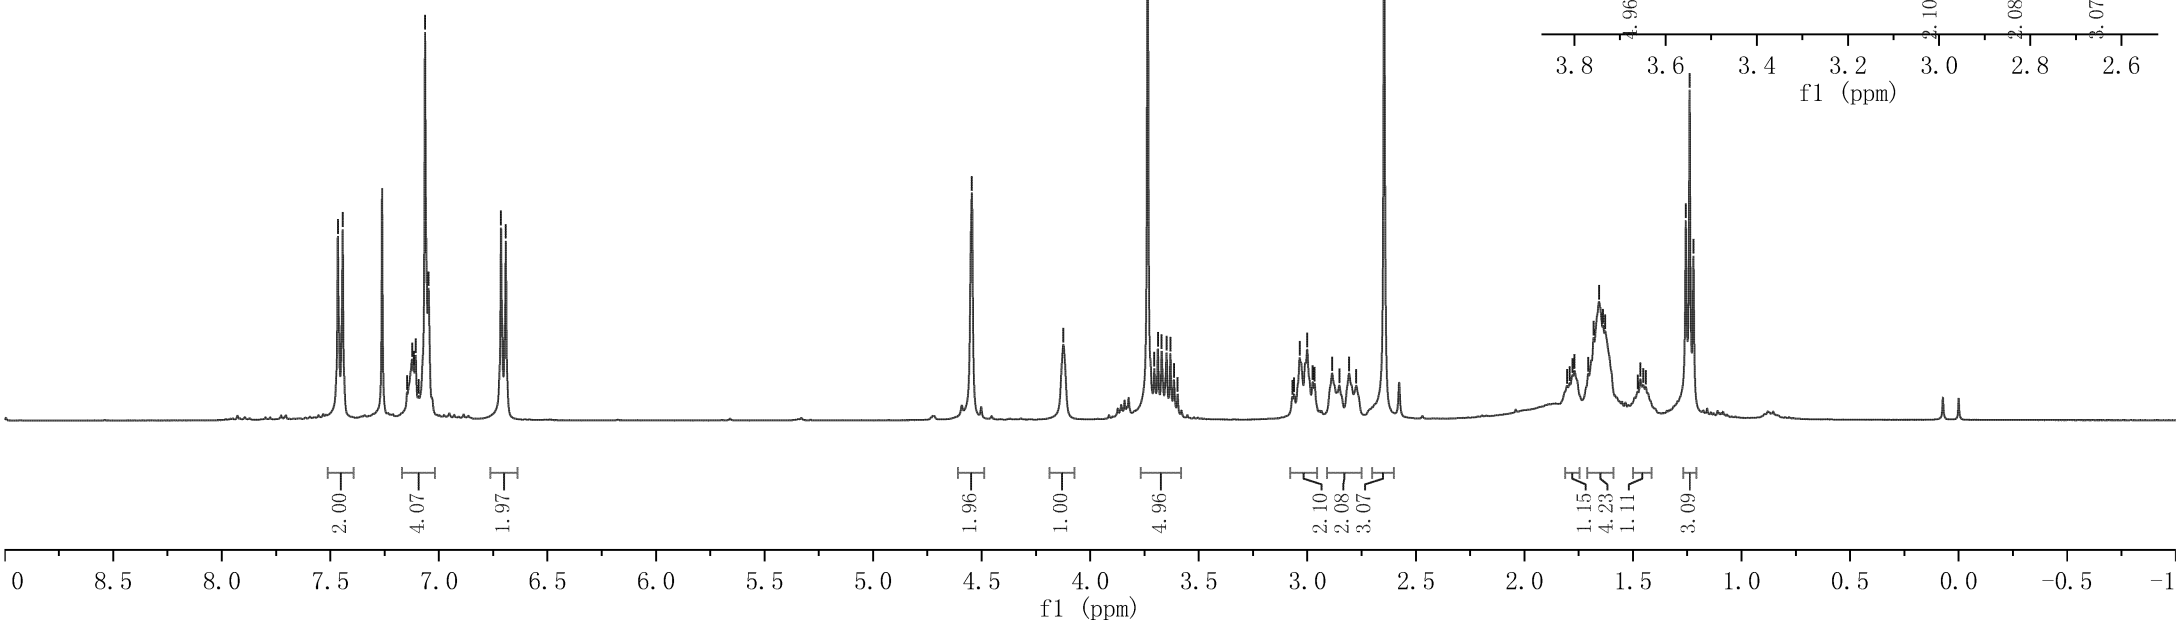

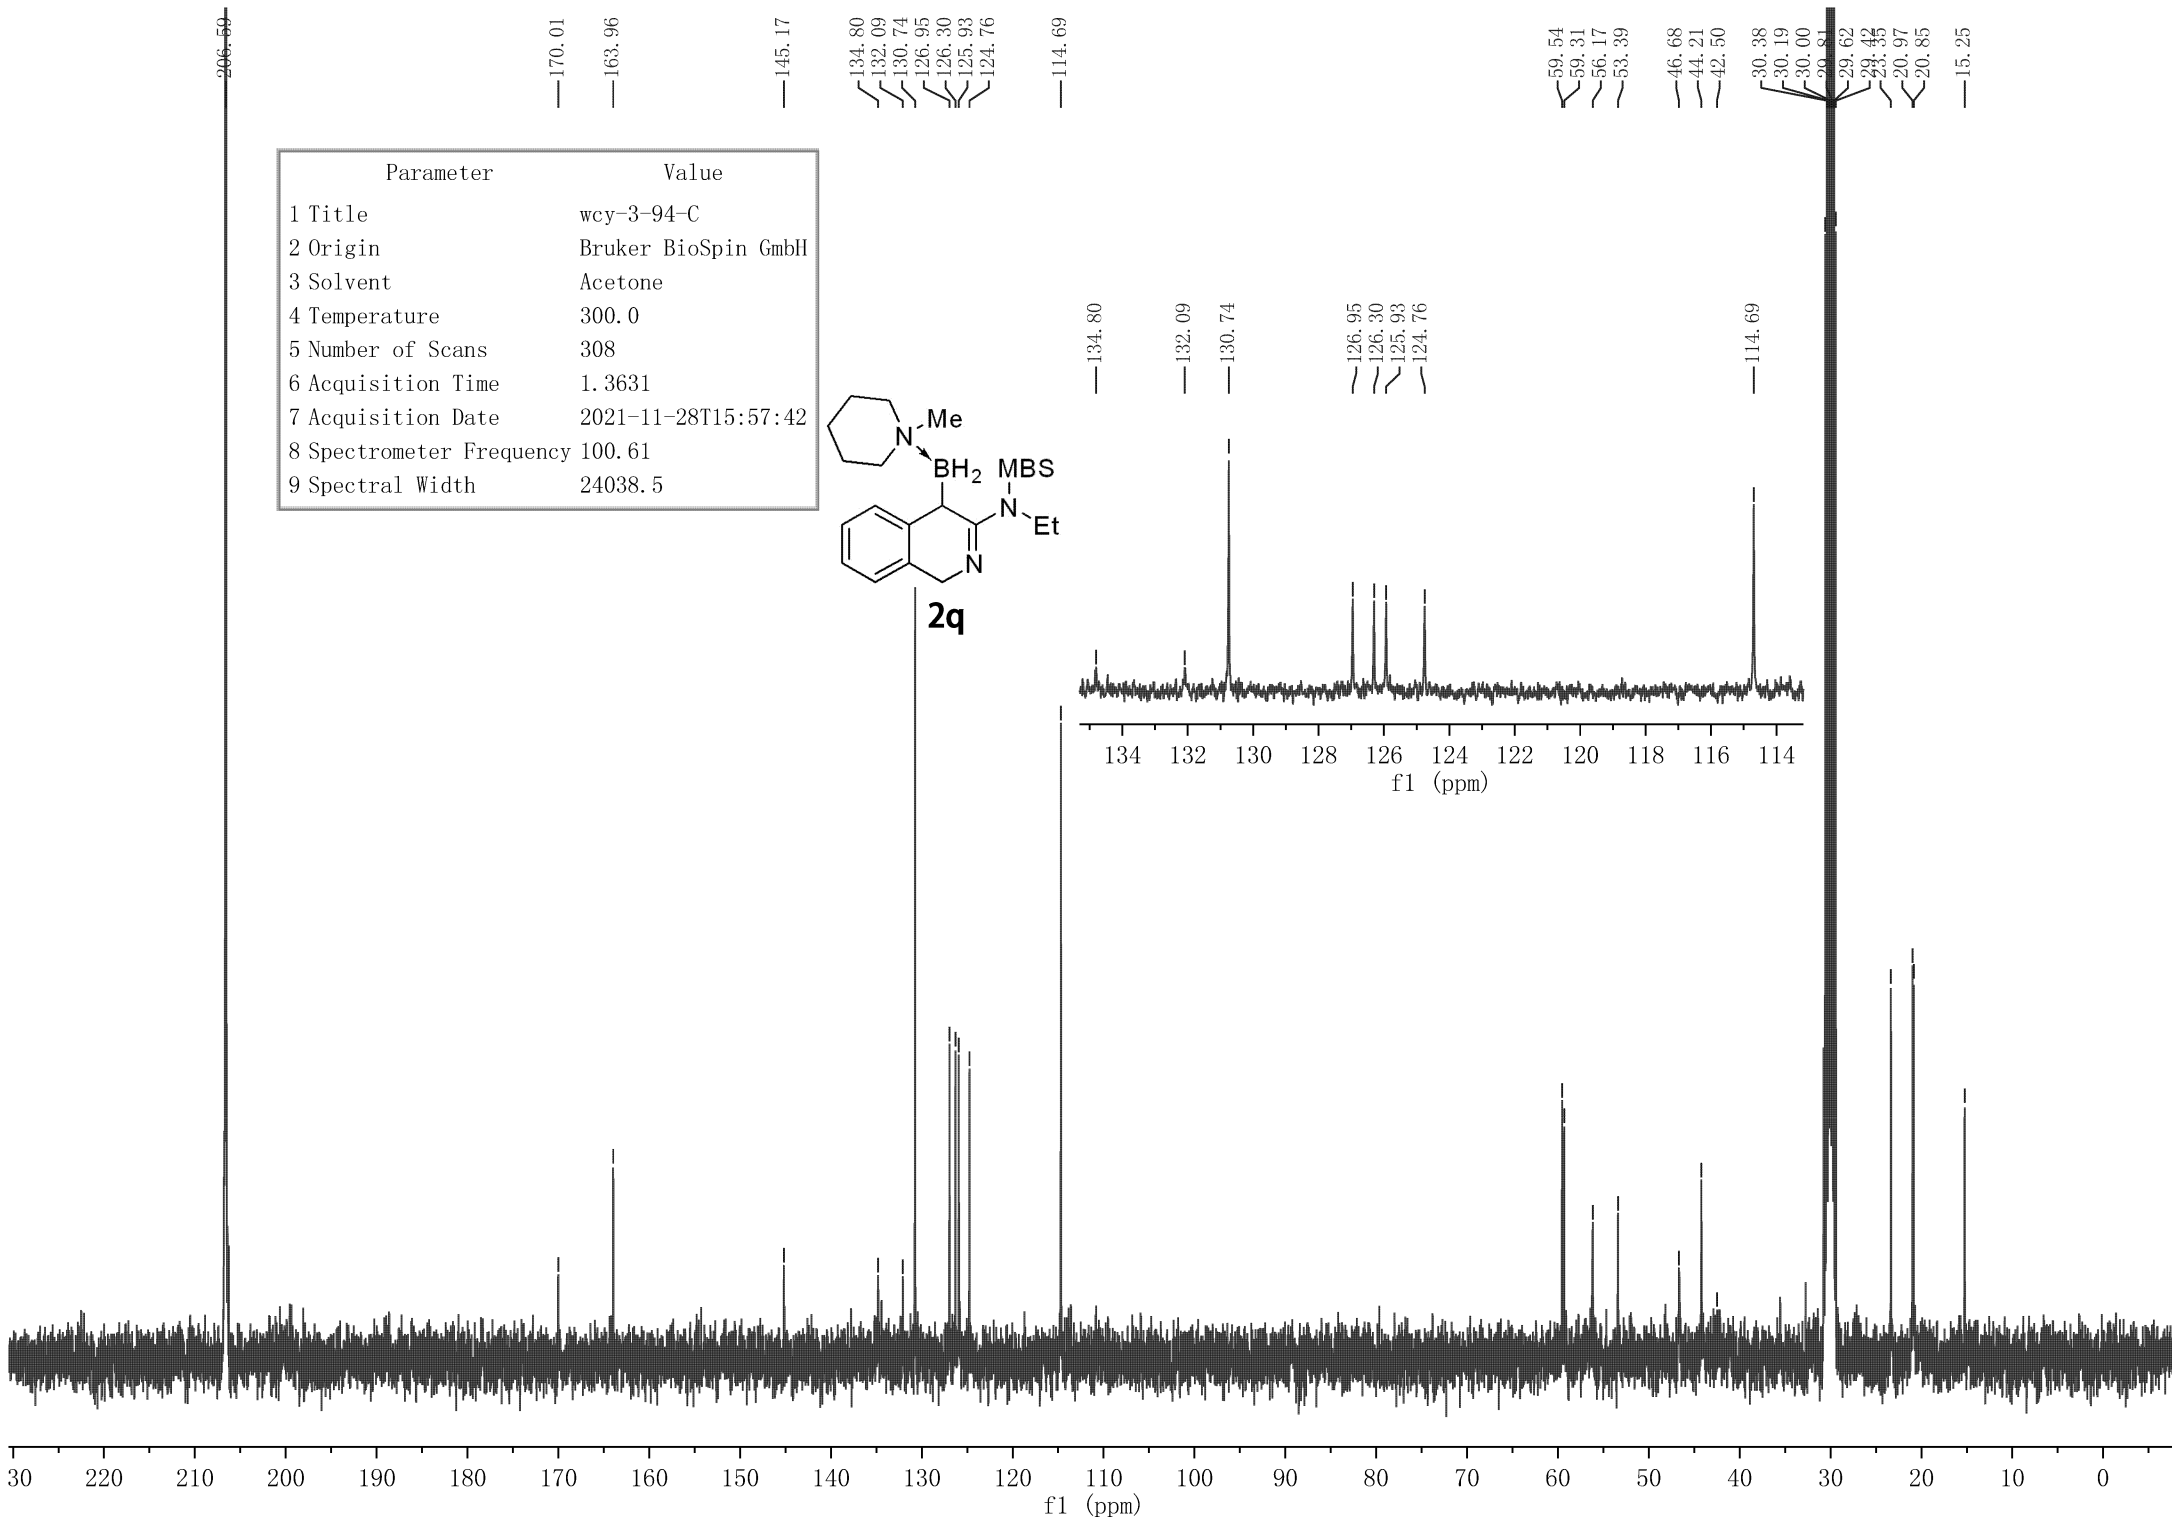

| Parameter                | Value               |
|--------------------------|---------------------|
| 1 Title                  | wcy-3-72-H          |
| 2 Origin                 | Bruker BioSpin GmbH |
| 3 Solvent                | CDC13               |
| 4 Temperature            | 298.0               |
| 5 Number of Scans        | 8                   |
| 6 Acquisition Time       | 4.0894              |
| 7 Acquisition Date       | 2021-11-24T13:18:52 |
| 8 Spectrometer Frequency | 400.13              |
| 9 Spectral Width         | 8012.8              |

7.495  
7.473  
7.135  
7.123  
7.079  
7.068  
6.964  
6.742  
6.720

4.555  
4.111  
3.753  
3.720  
3.704  
3.687  
3.672  
3.654  
3.638

1.257  
1.240  
1.222

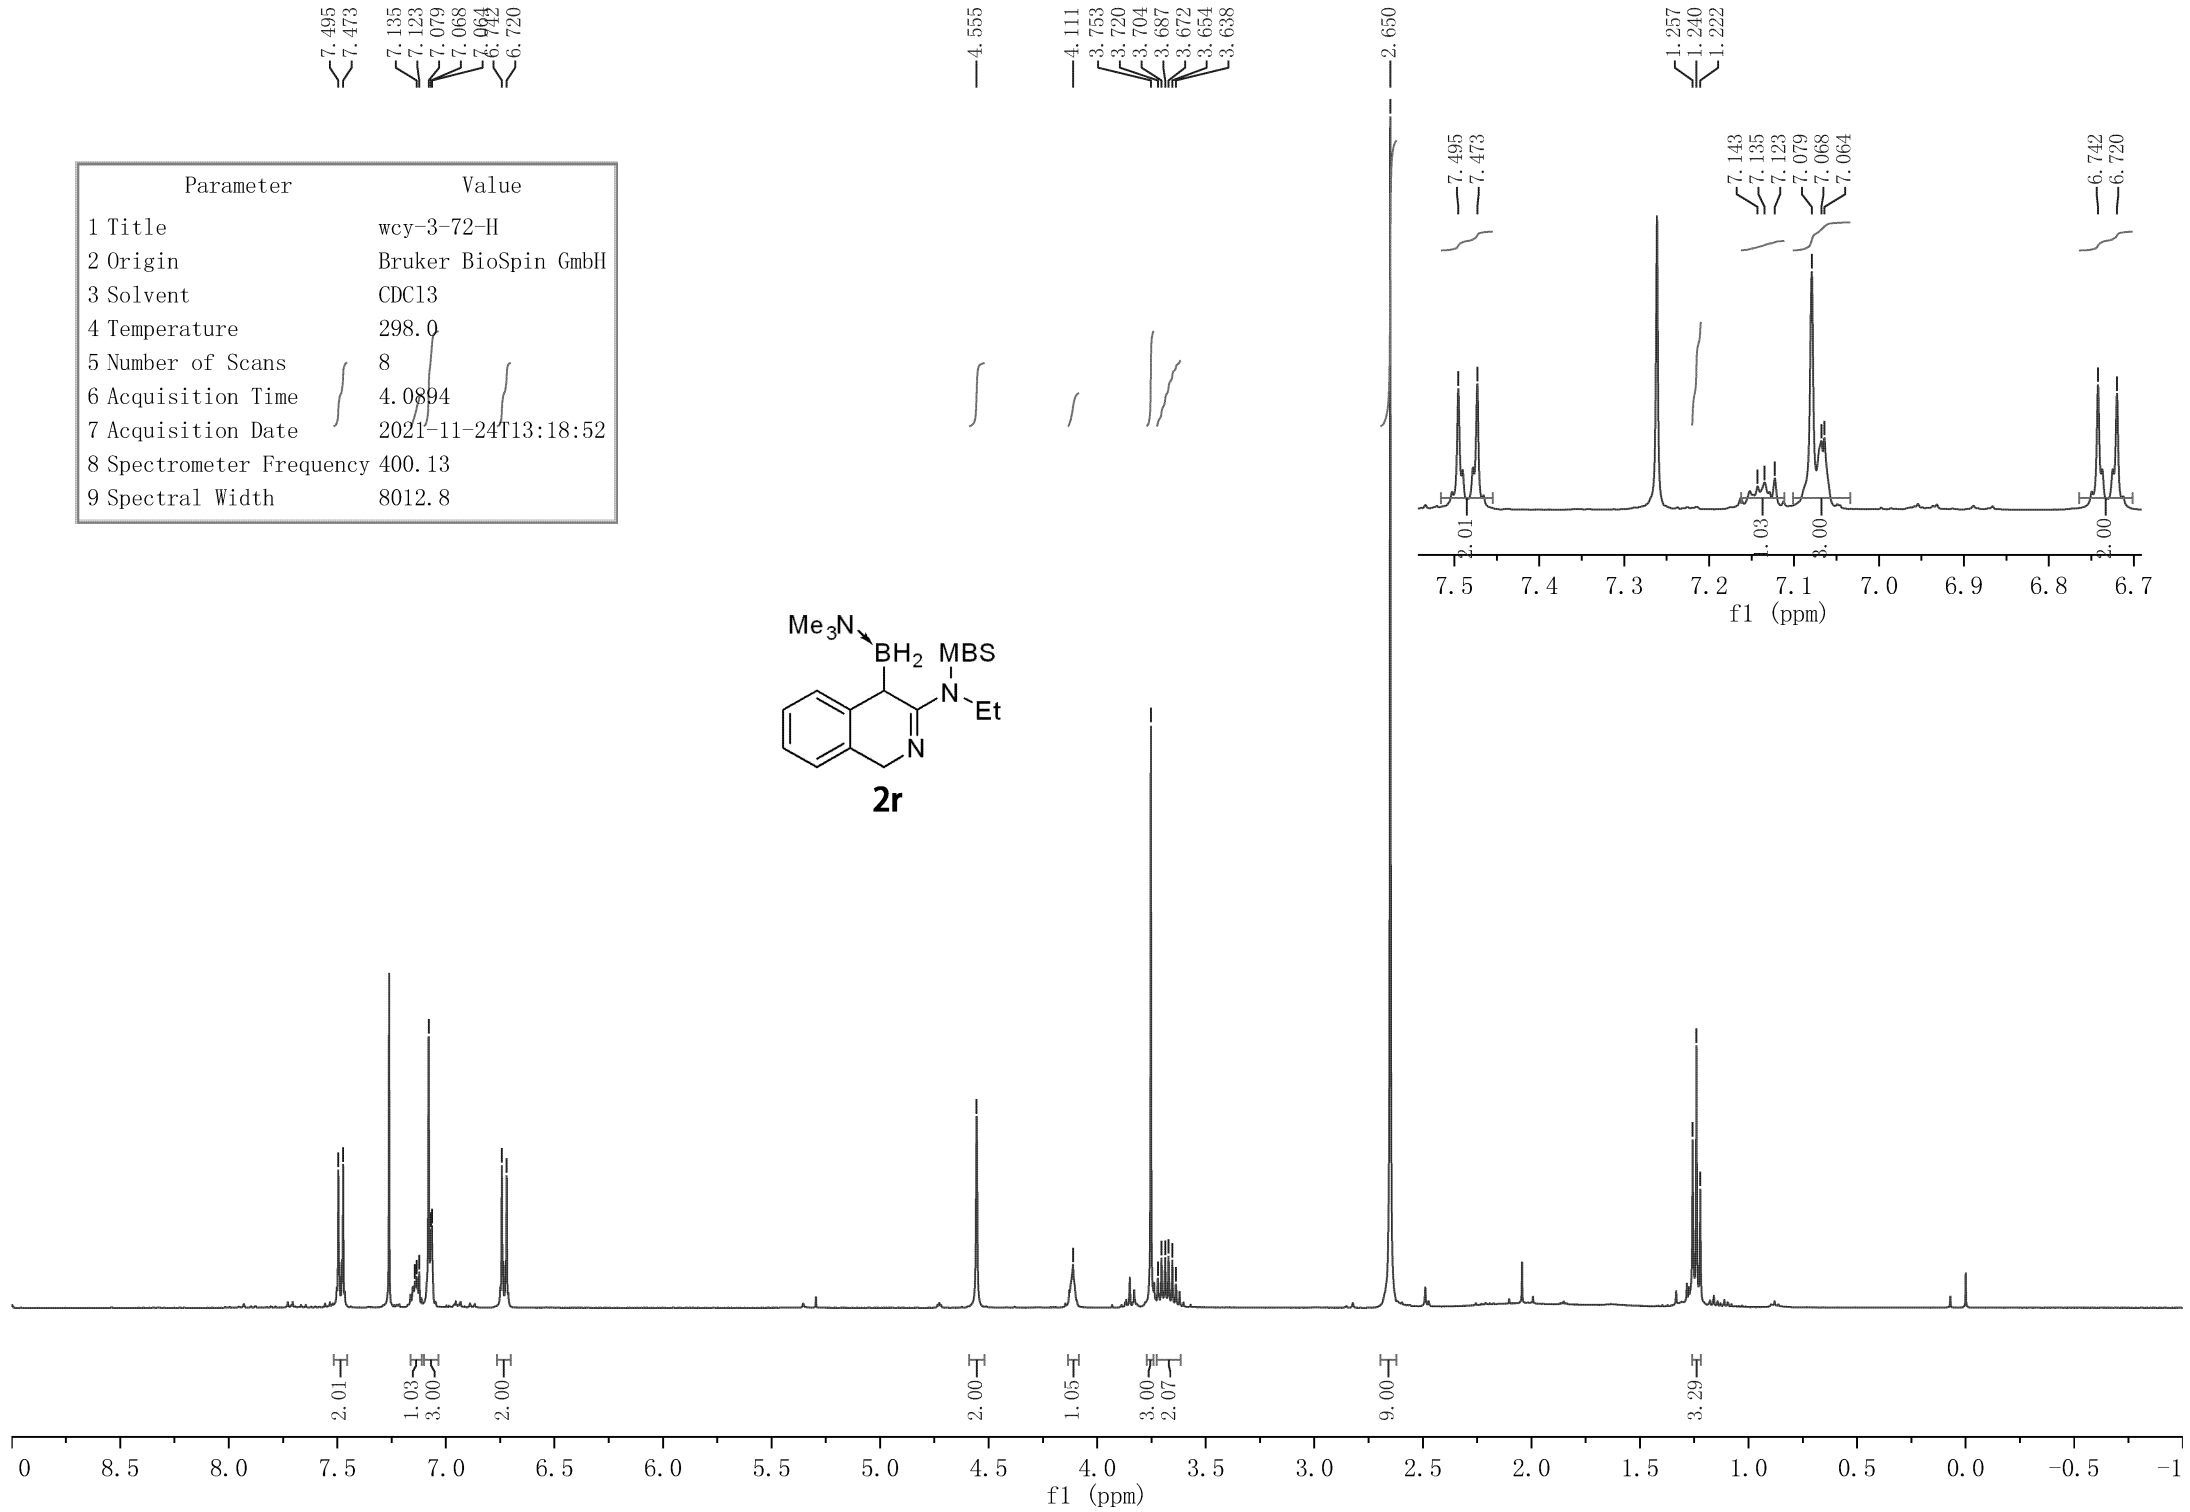

| Parameter                | Value               |
|--------------------------|---------------------|
| 1 Title                  | wcy-3-72-C          |
| 2 Origin                 | Bruker BioSpin GmbH |
| 3 Solvent                | CDCl3               |
| 4 Temperature            | 300.0               |
| 5 Number of Scans        | 234                 |
| 6 Acquisition Time       | 1.3631              |
| 7 Acquisition Date       | 2021-11-24T13:20:25 |
| 8 Spectrometer Frequency | 100.61              |
| 9 Spectral Width         | 24038.5             |

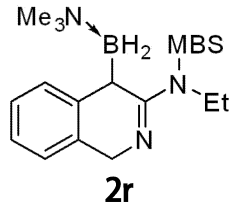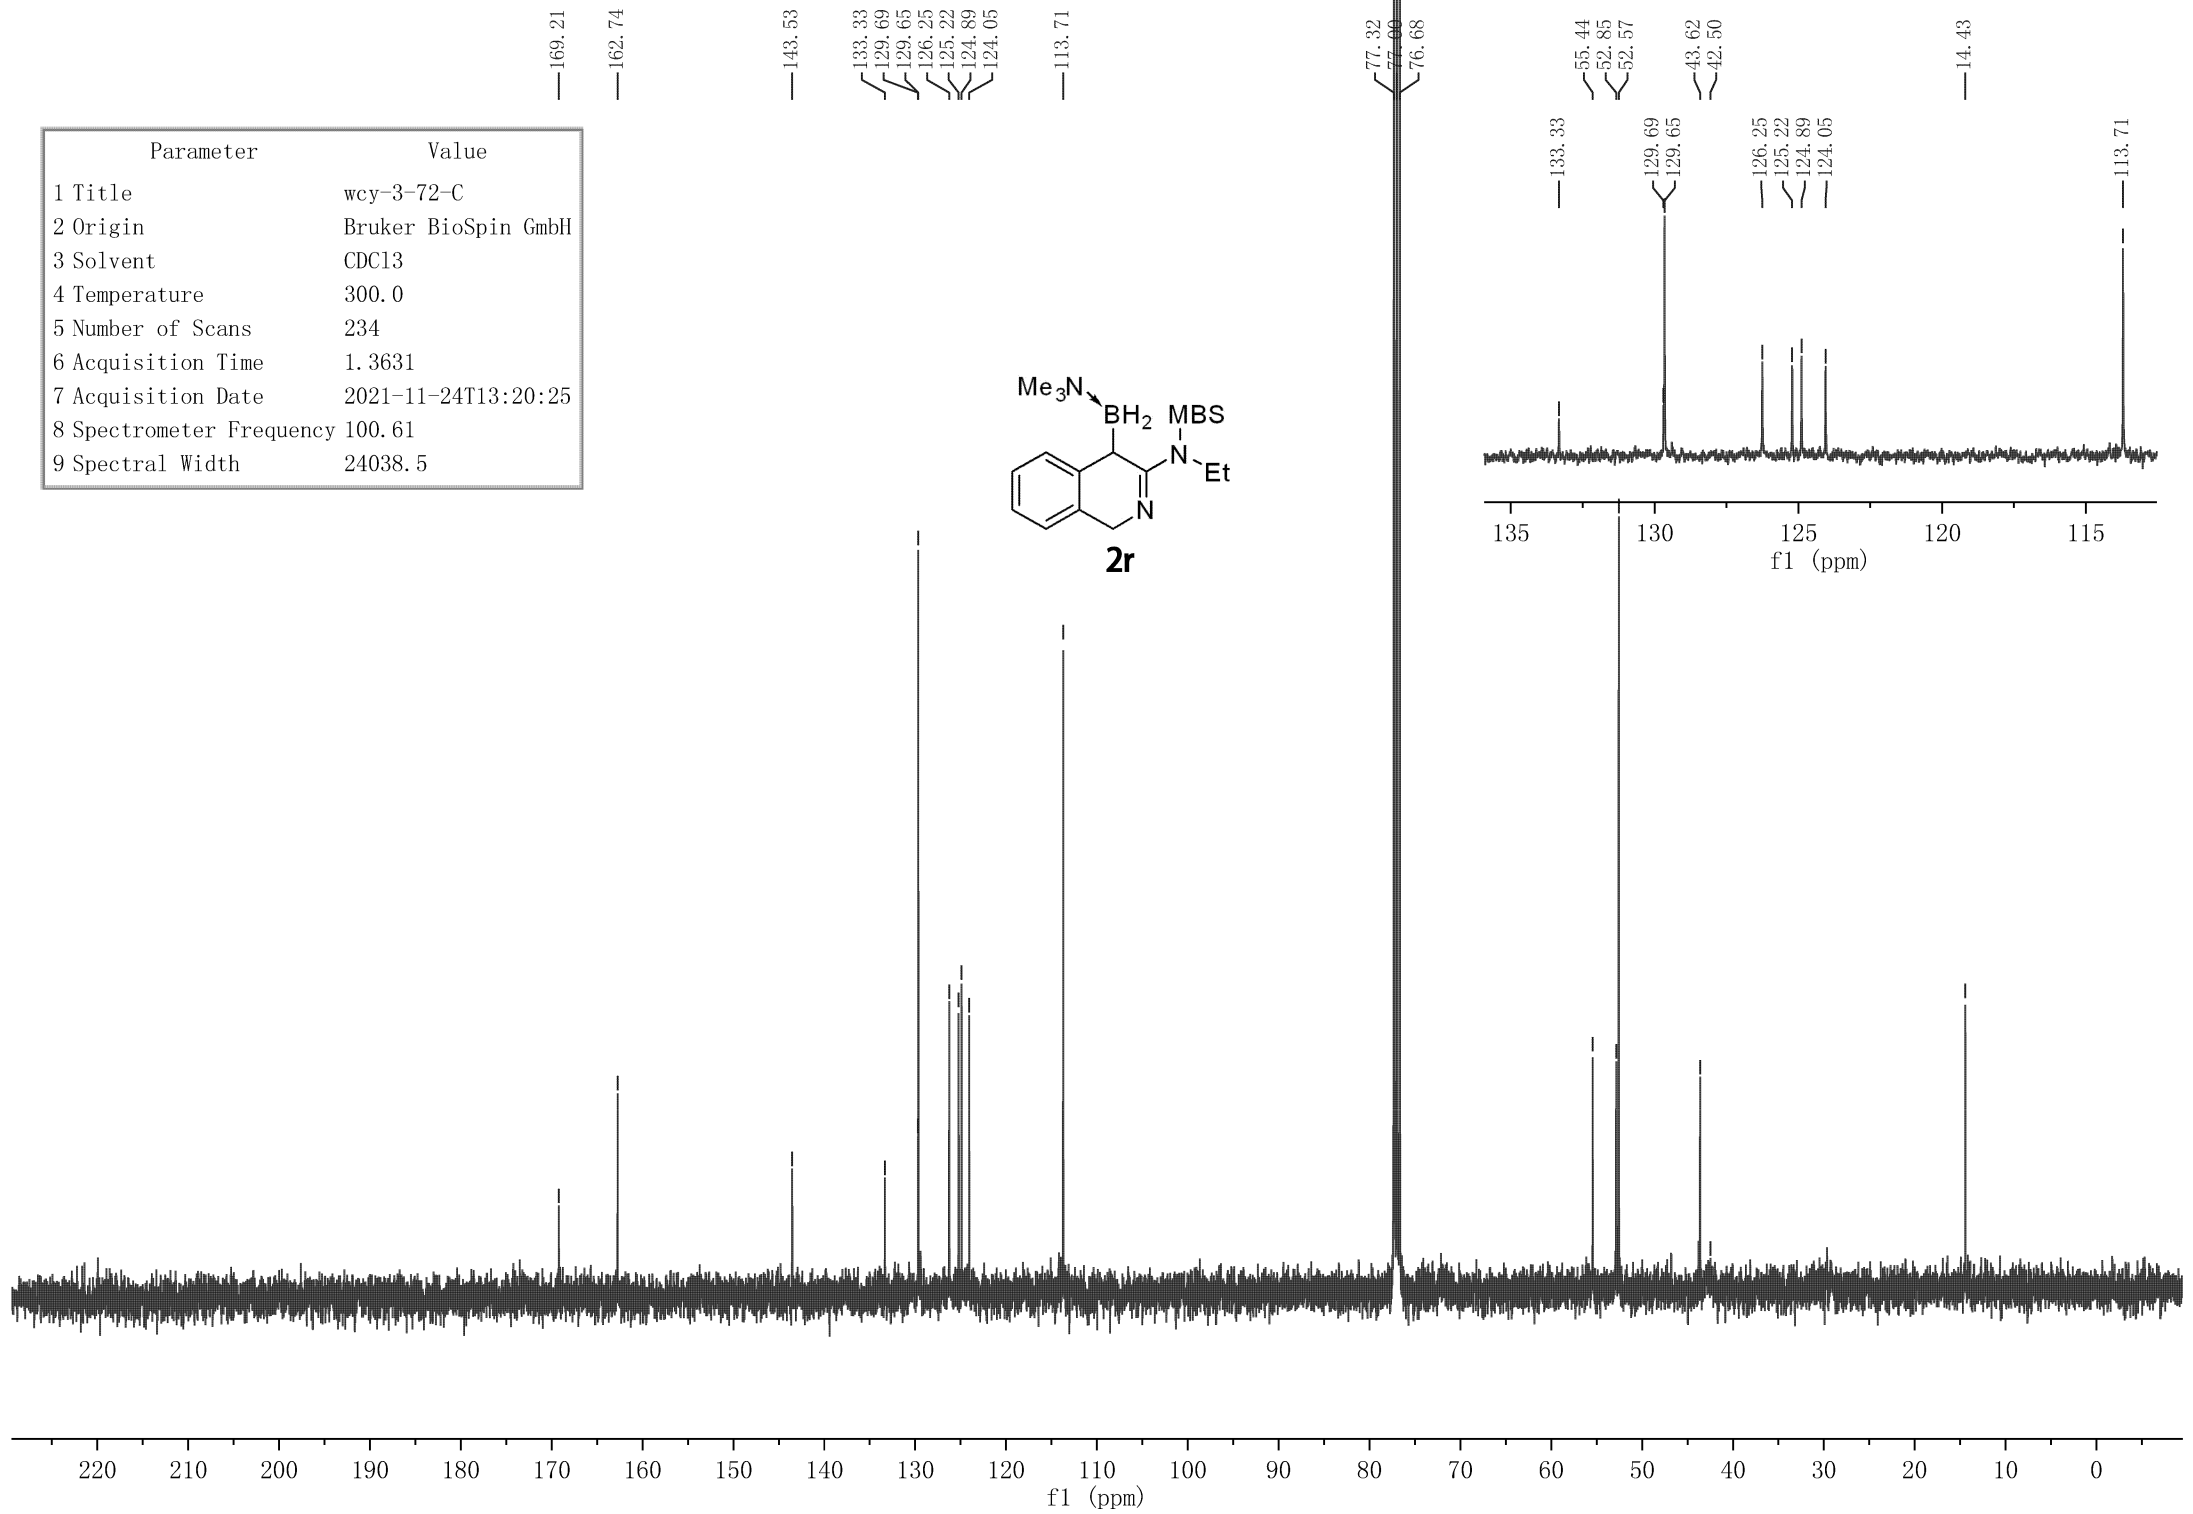



| Parameter                | Value               |
|--------------------------|---------------------|
| 1 Title                  | transformation      |
| 2 Origin                 | Bruker BioSpin GmbH |
| 3 Solvent                | CDC13               |
| 4 Temperature            | 298.0               |
| 5 Number of Scans        | 9                   |
| 6 Acquisition Time       | 4.0894              |
| 7 Acquisition Date       | 2021-12-10T16:00:47 |
| 8 Spectrometer Frequency | 400.13              |
| 9 Spectral Width         | 8012.8              |

7.728  
7.706  
7.235  
7.224  
7.219  
7.213  
7.174  
7.164  
7.146  
7.133  
7.124  
6.953  
6.931

4.735  
4.727  
4.719

3.847  
3.836  
3.827  
3.819  
3.734  
3.717  
3.699  
3.682

1.177  
1.160  
1.142

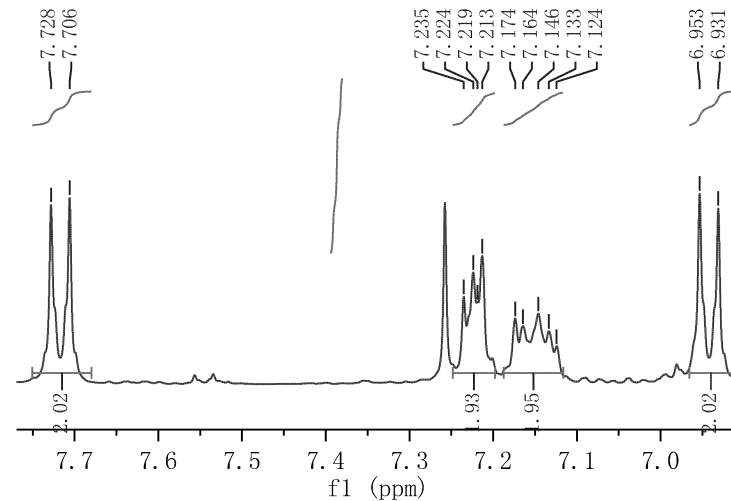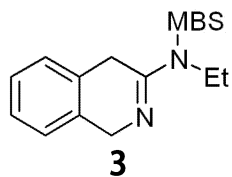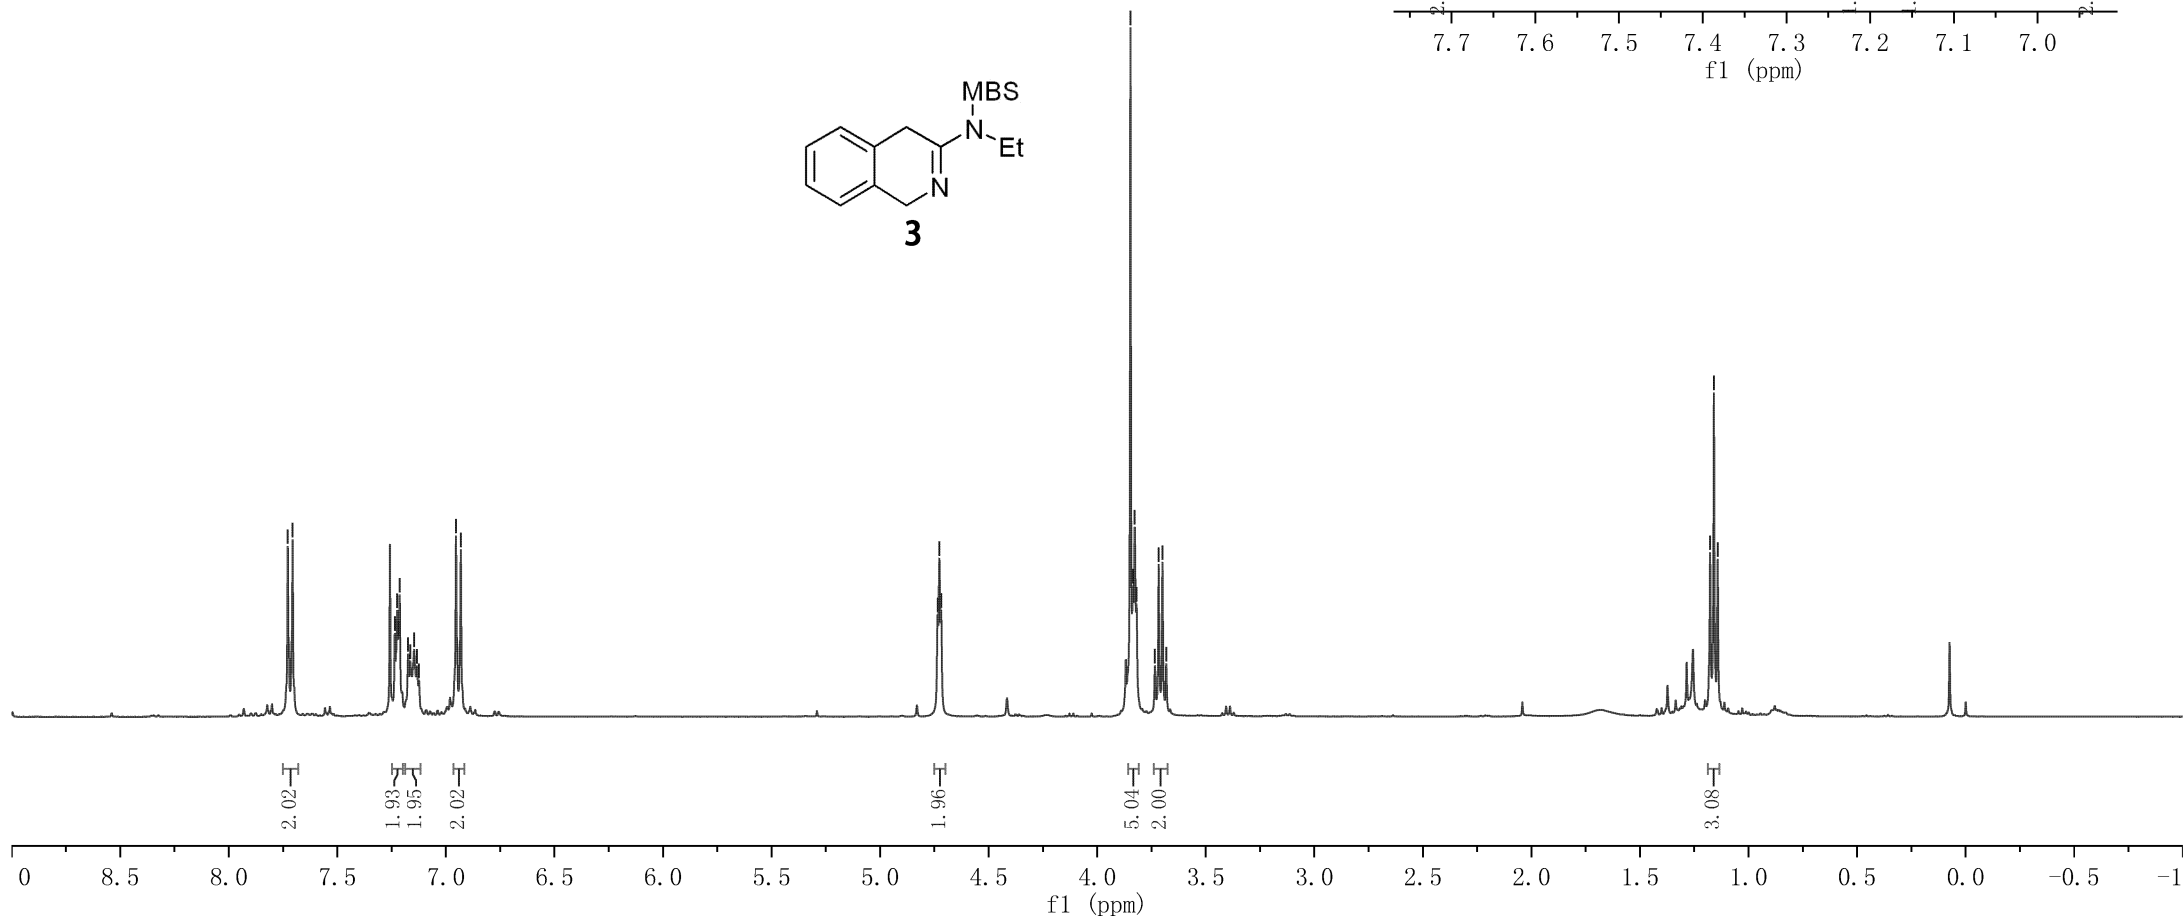

| Parameter                | Value               |
|--------------------------|---------------------|
| 1 Title                  | transformation      |
| 2 Origin                 | Bruker BioSpin GmbH |
| 3 Solvent                | CDC13               |
| 4 Temperature            | 300.0               |
| 5 Number of Scans        | 78                  |
| 6 Acquisition Time       | 1.3631              |
| 7 Acquisition Date       | 2021-12-10T16:02:10 |
| 8 Spectrometer Frequency | 100.61              |
| 9 Spectral Width         | 24038.5             |

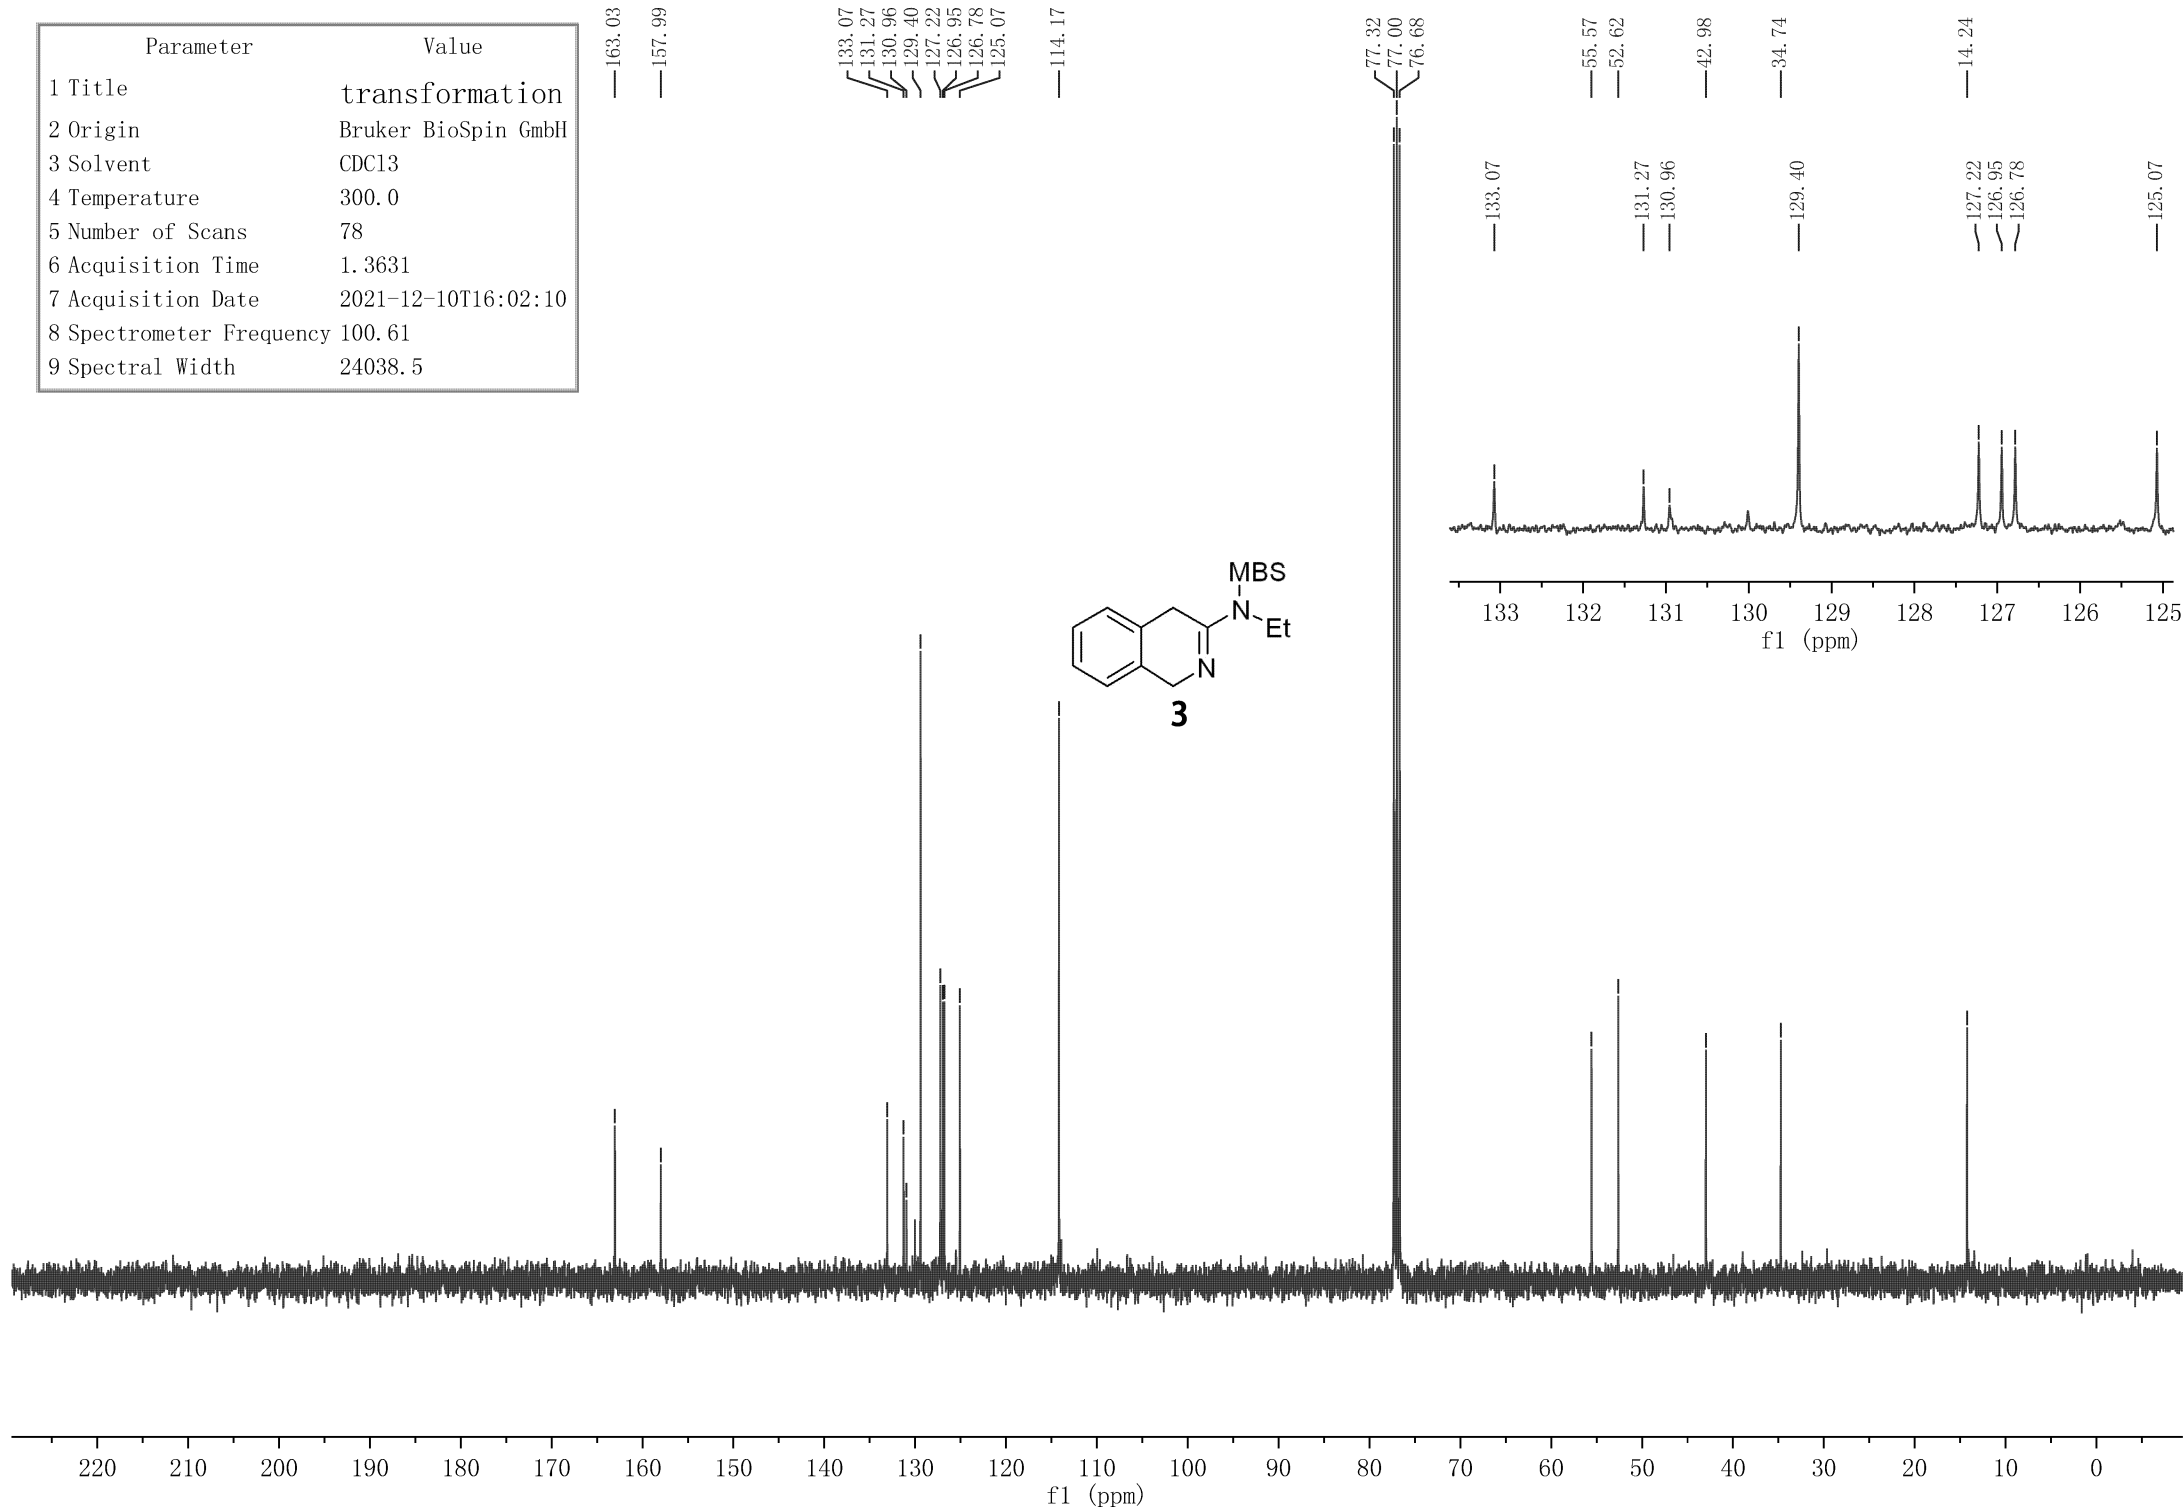

| Parameter                | Value               |
|--------------------------|---------------------|
| 1 Title                  | wcy-4-oxidation-H   |
| 2 Origin                 | Bruker BioSpin GmbH |
| 3 Solvent                | CDC13               |
| 4 Temperature            | 298.0               |
| 5 Number of Scans        | 5                   |
| 6 Acquisition Time       | 4.0894              |
| 7 Acquisition Date       | 2022-03-15T22:51:30 |
| 8 Spectrometer Frequency | 400.13              |
| 9 Spectral Width         | 8012.8              |

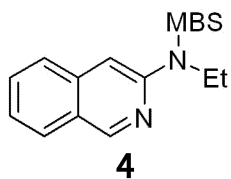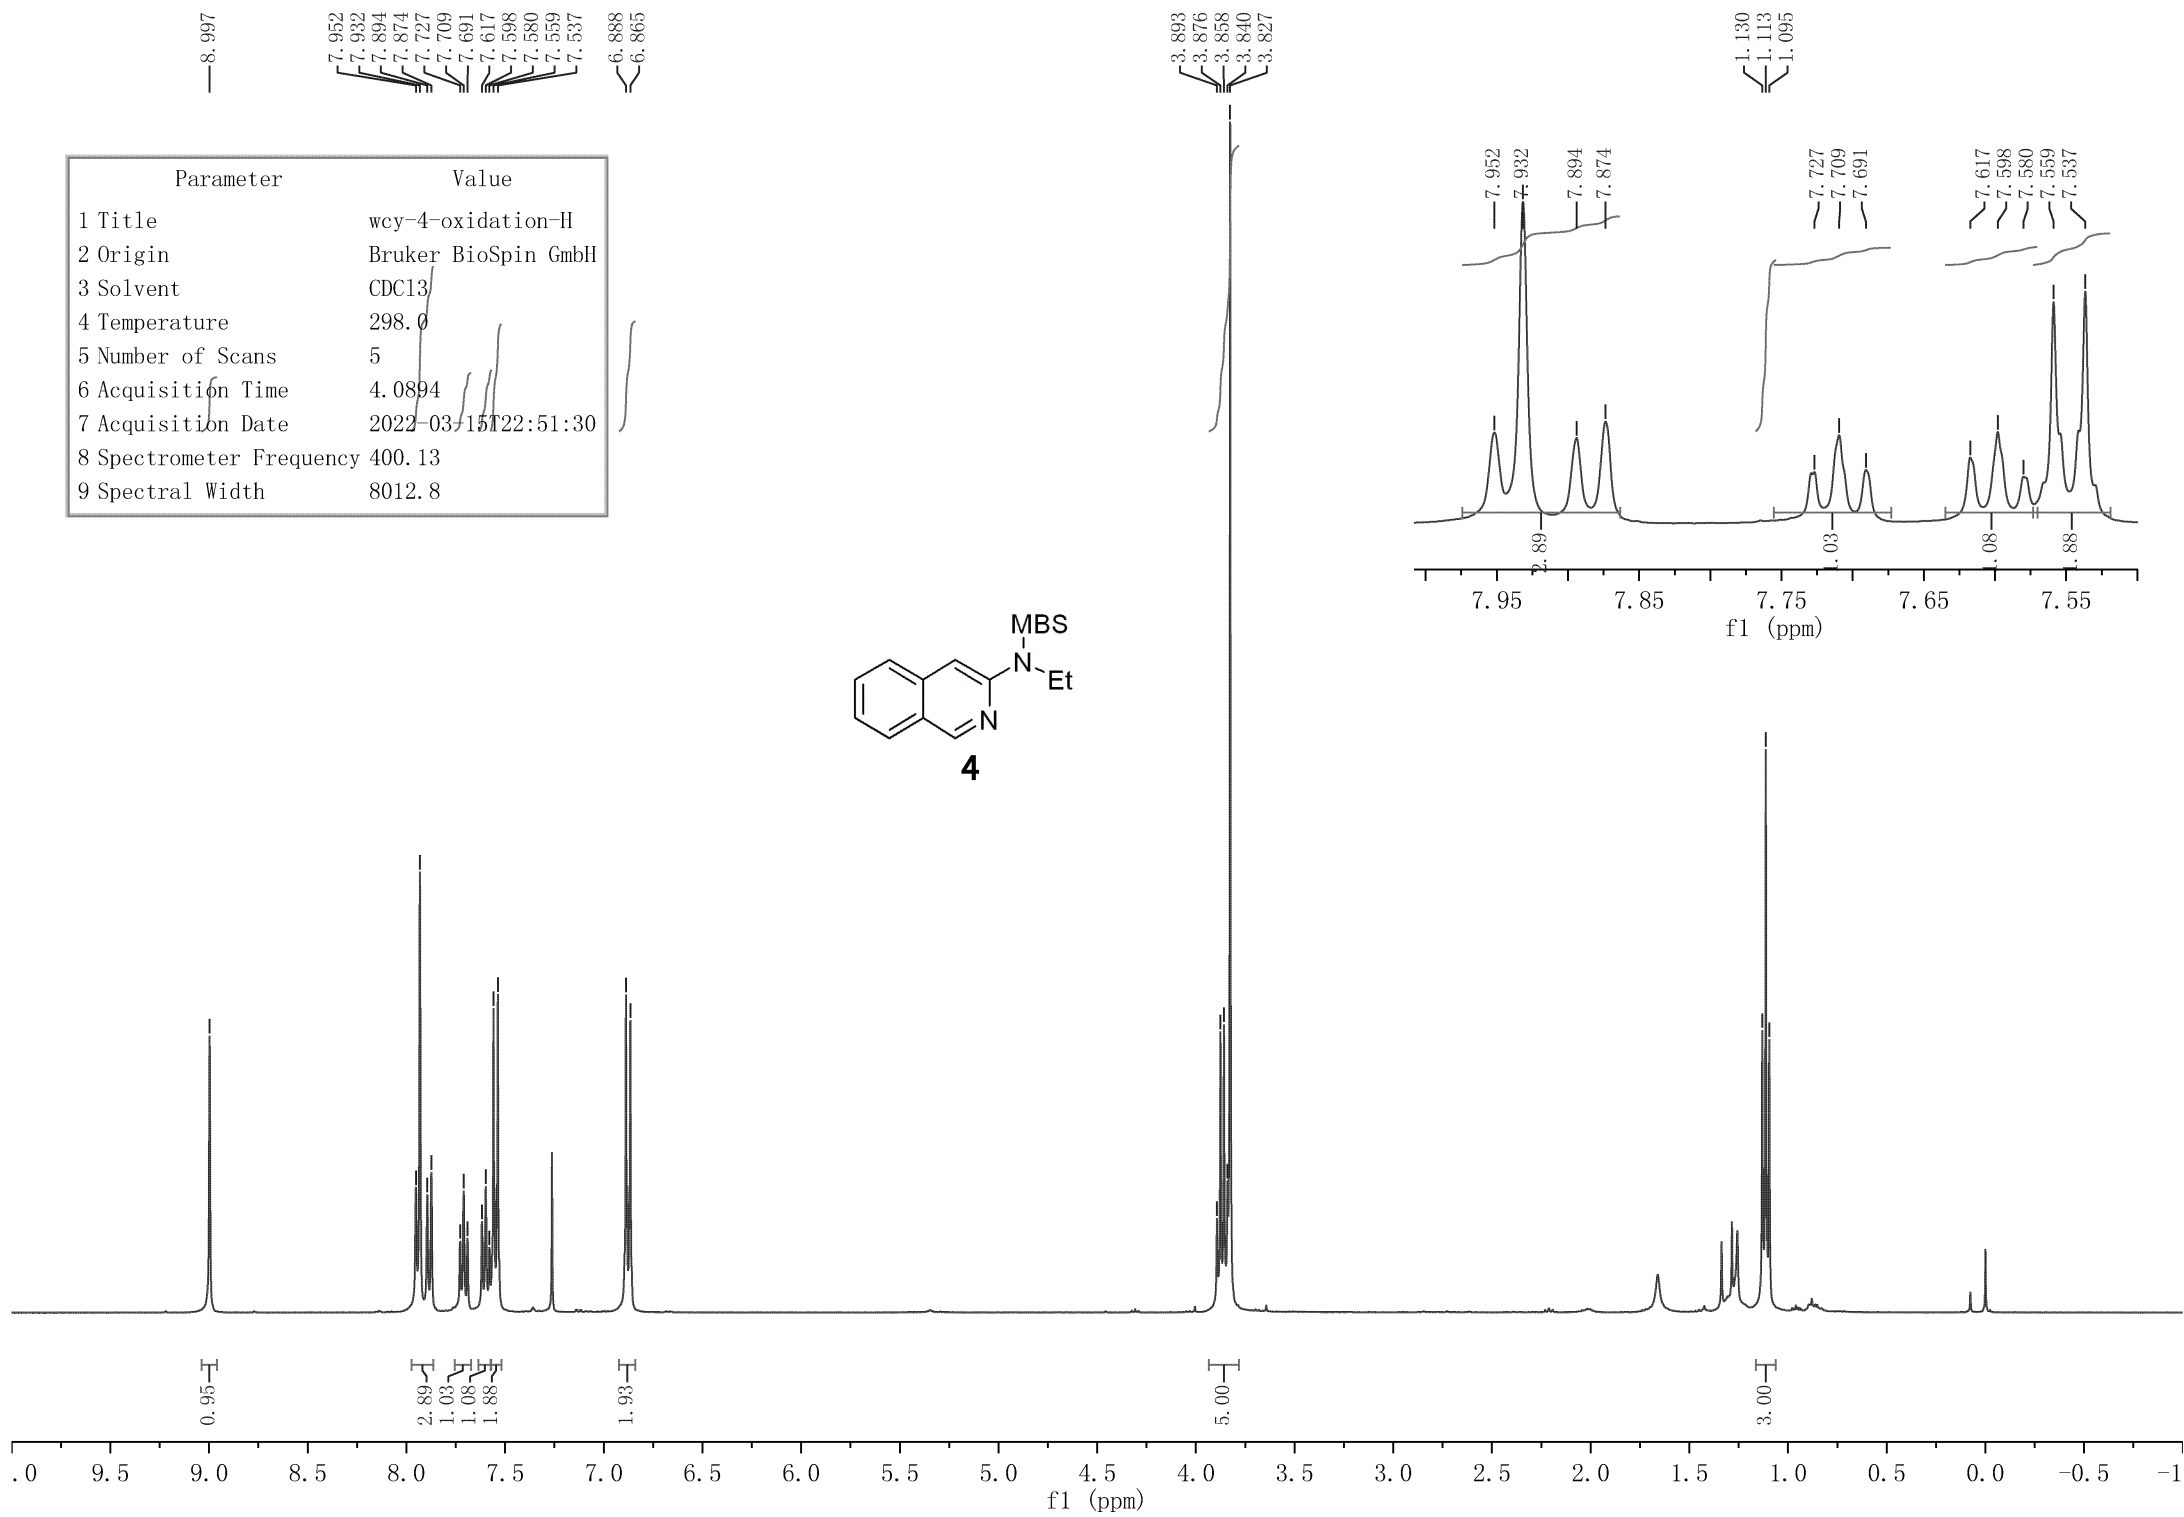

| Parameter                | Value               |
|--------------------------|---------------------|
| 1 Title                  | wcy-4-oxidation-C   |
| 2 Origin                 | Bruker BioSpin GmbH |
| 3 Solvent                | CDCl3               |
| 4 Temperature            | 300.0               |
| 5 Number of Scans        | 26                  |
| 6 Acquisition Time       | 1.3631              |
| 7 Acquisition Date       | 2022-03-15T22:52:43 |
| 8 Spectrometer Frequency | 100.61              |
| 9 Spectral Width         | 24038.5             |

162.80  
151.40  
146.61  
137.18  
130.67  
129.68  
127.44  
127.39  
127.29  
126.97  
113.93

77.32  
77.00  
76.68  
55.47  
43.31  
14.12

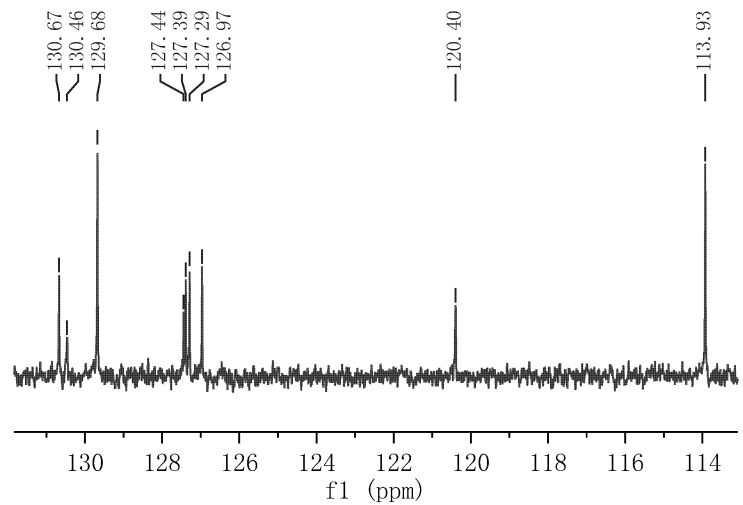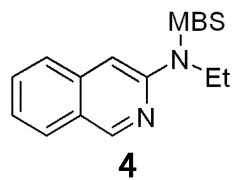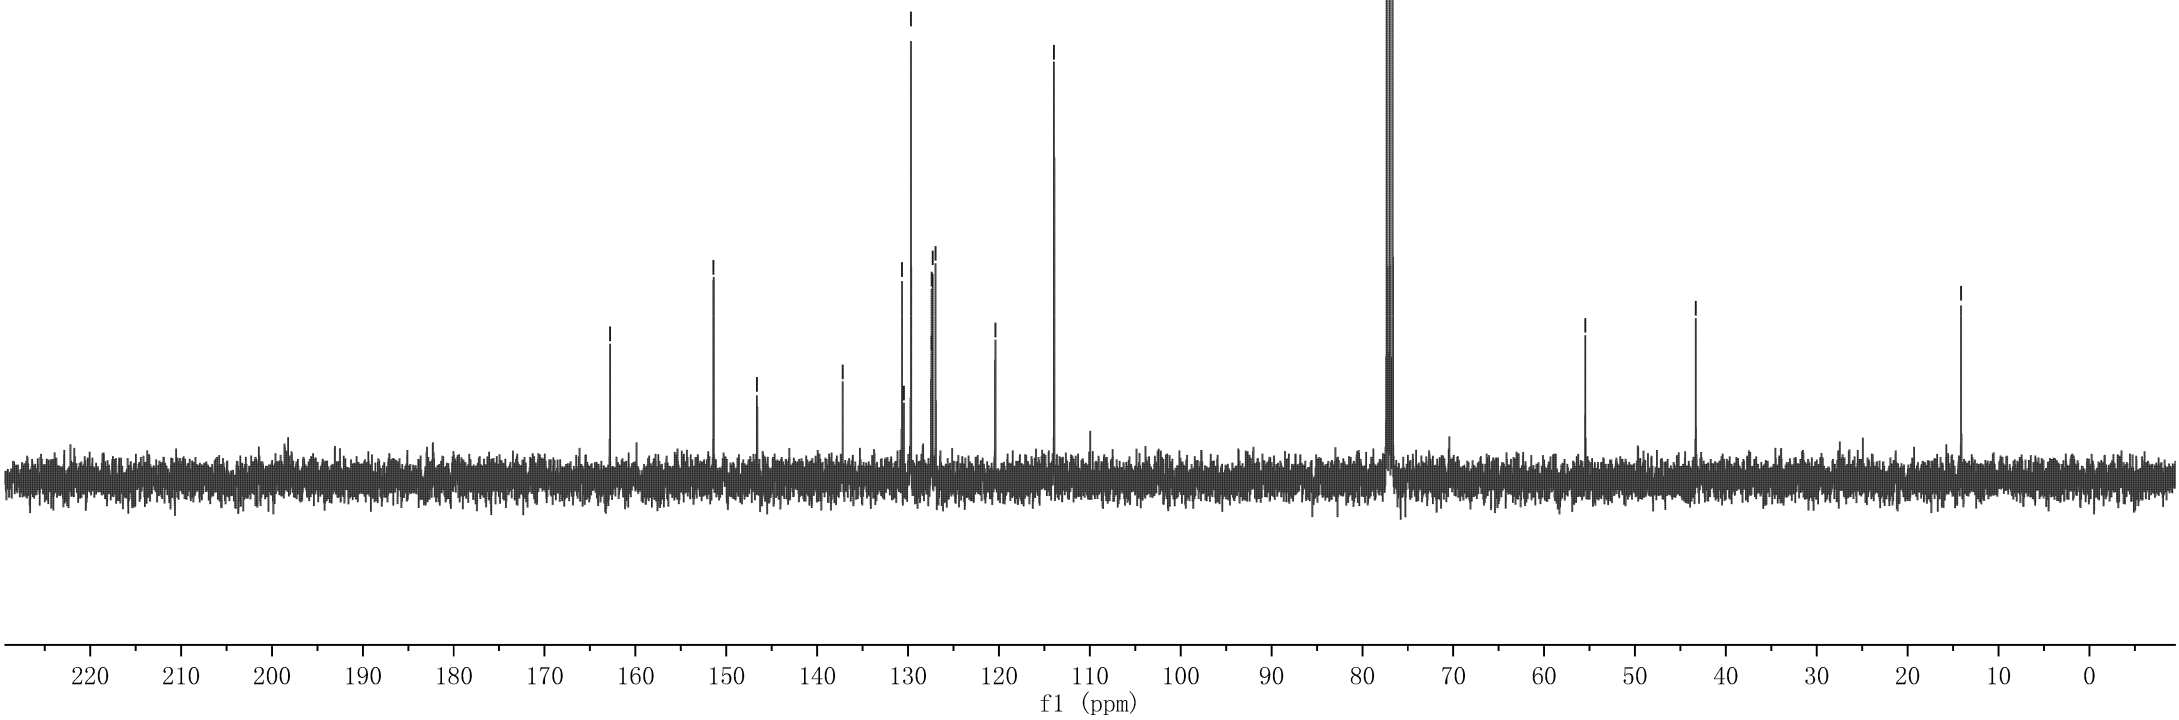

| Parameter                | Value                |
|--------------------------|----------------------|
| 1 Title                  | wcy-4-oxidation-dept |
| 2 Origin                 | Bruker BioSpin GmbH  |
| 3 Solvent                | CDC13                |
| 4 Temperature            | 300.0                |
| 5 Number of Scans        | 11                   |
| 6 Acquisition Time       | 1.3631               |
| 7 Acquisition Date       | 2022-03-19T17:54:57  |
| 8 Spectrometer Frequency | 100.61               |
| 9 Spectral Width         | 24038.5              |

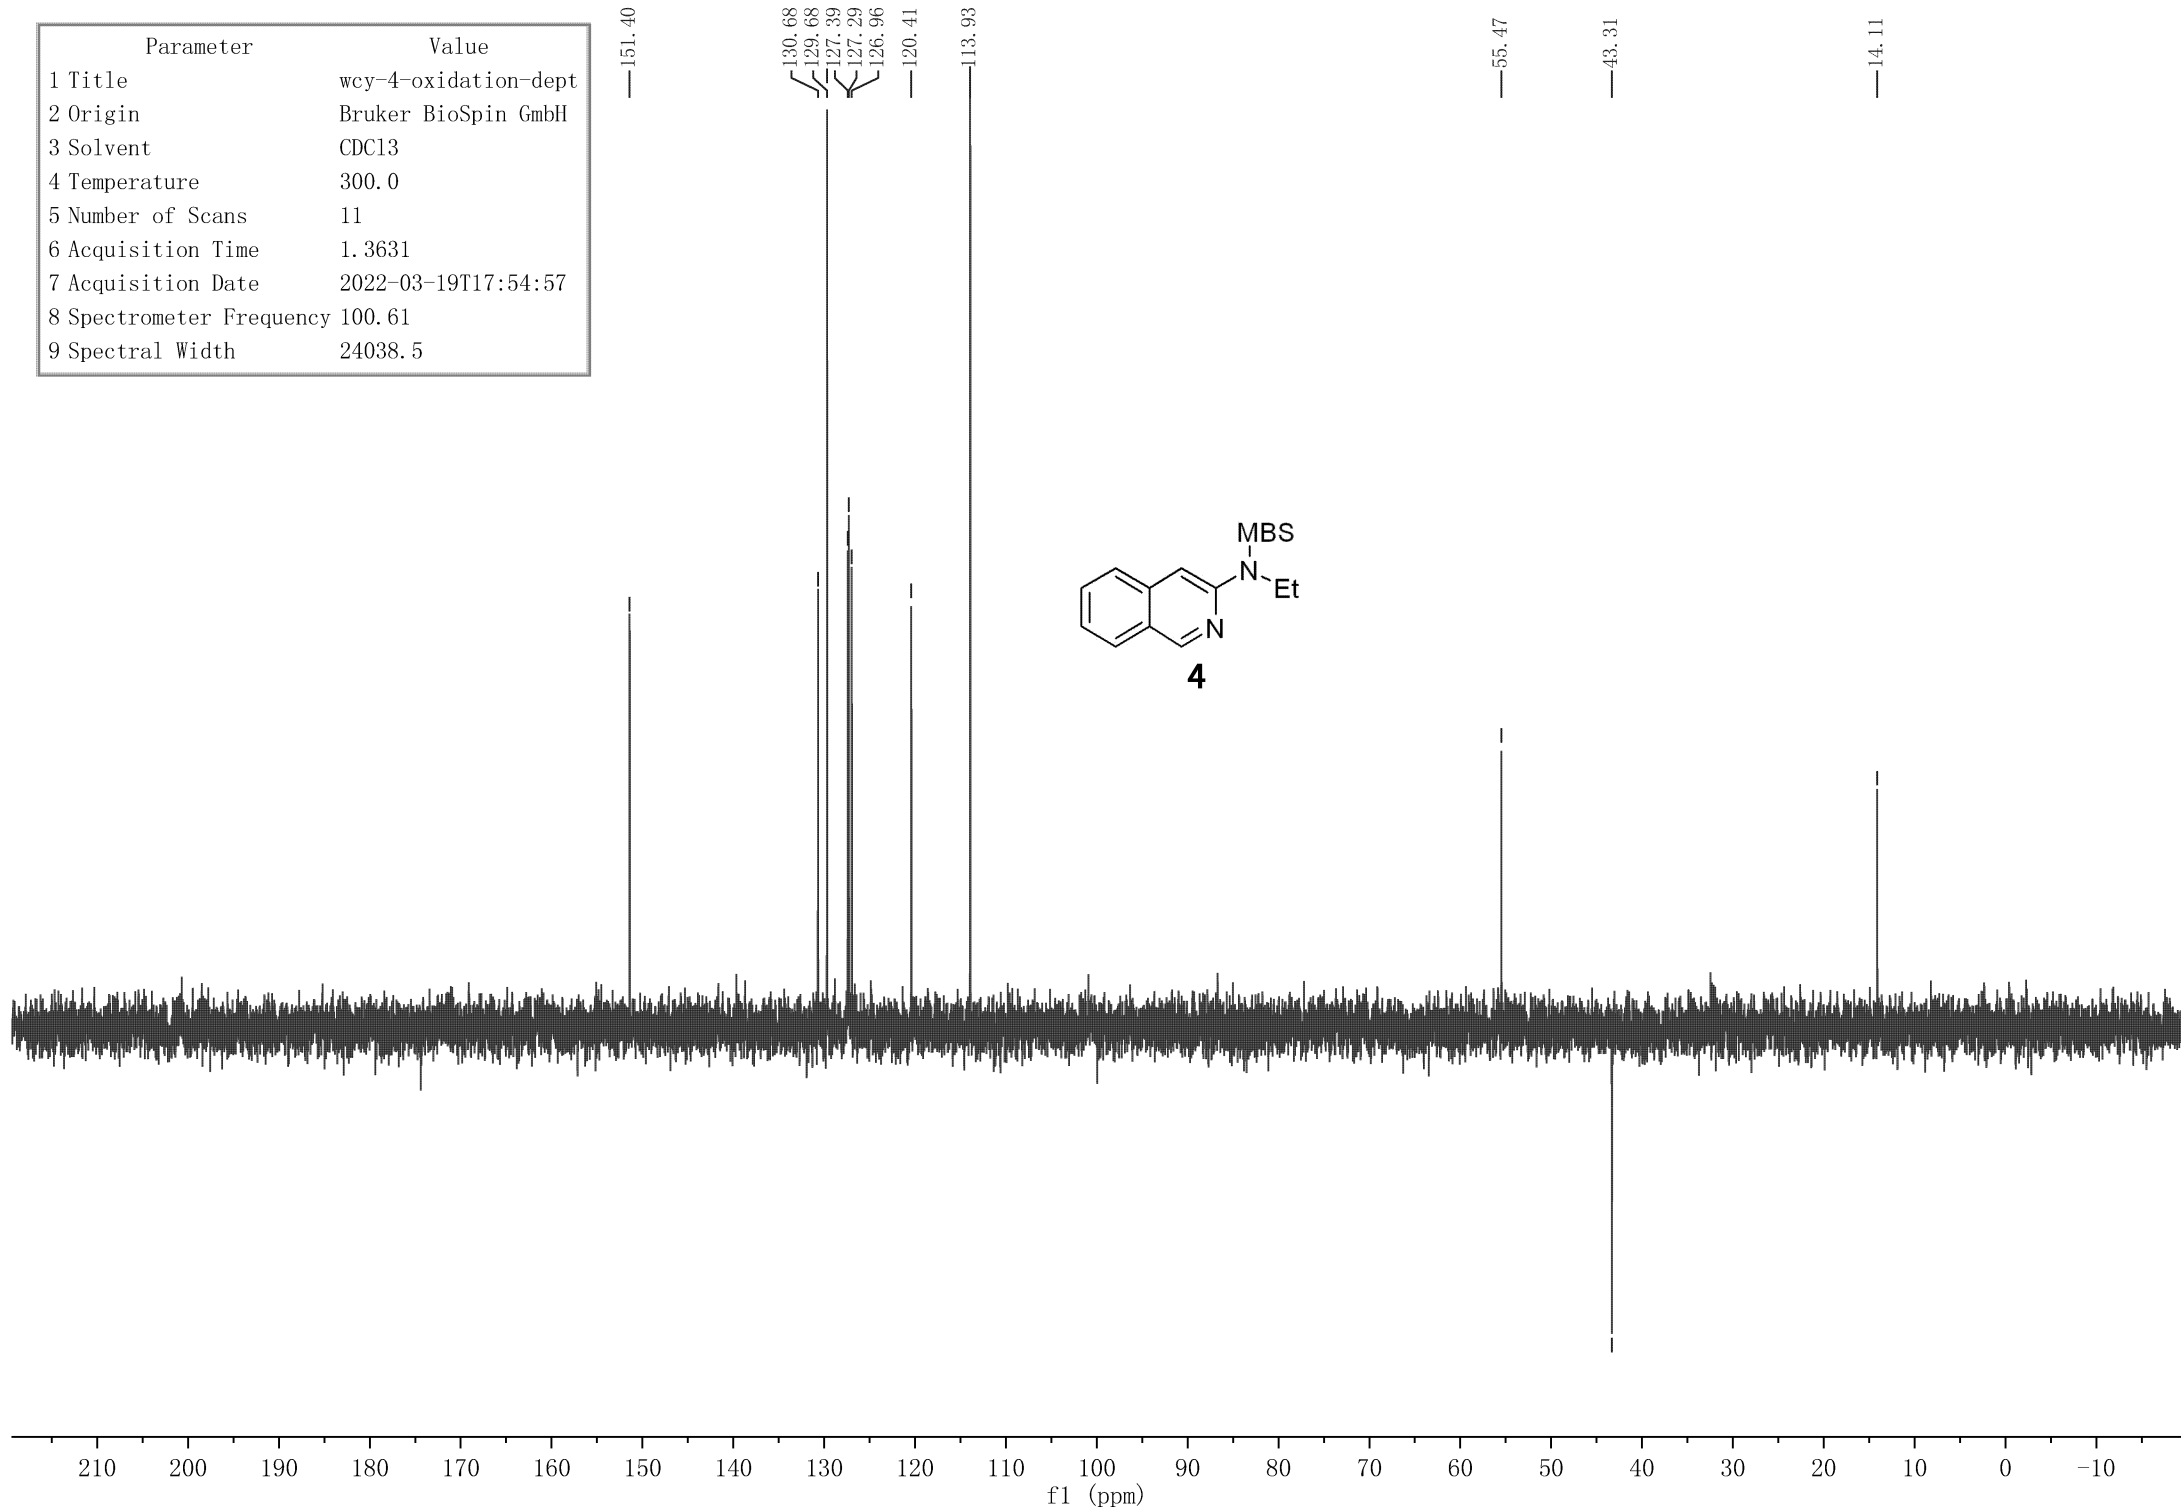

Supplement: d2qo00457g1.pdf [file d2qo00457g1.pdf]
